# Supplementary material for: From Plant Infectivity to Growth Patterns: The Role of Blue-Light Sensing in the Prokaryotic World
Source: MDPI journal article supplement (doi:10.3390/plants3010070), 2014-01-27
Supplement: s1 [file s1]

# Archaeal LOV domains

| Nr. | Species/strain                               | Group | Accession nr. Uniprot | Accession nr. NCBI        | aa nr. | Domains                               | Prot. nr |
|-----|----------------------------------------------|-------|-----------------------|---------------------------|--------|---------------------------------------|----------|
| 1   | <i>Haladaptatus paucihalophilus</i> DX253    | Eu A  | E7QV78                | WP_007980661.1            | 621    | PAS+LOV+GAF+HTH                       | 1        |
| 2   | <i>Halalkalicoccus jeotgali</i> DSM 18796    | Eu A  | D8J3G3                | YP_003737062.1            | 531    | PAS+LOV+GAF+HTH                       | 2        |
|     |                                              |       | G0HVV3                | YP_004795441.1            | 726    | RR+PAS+LOV+PAS+Kinase                 | 3        |
| 3   | <i>Halarchaeum acidiphilum</i>               | EuA   |                       | WP_021780048.1            | 548    | ?-LOV                                 | 4        |
| 4   | <i>Haloarcula amylolytica</i> JCM 13557      | EuA   | M0KRQ6                | WP_008309224.1            | 748    | RR+LOV+GAF+Kinase                     | 5        |
|     |                                              |       | M0KMX5                | WP_008310353.1            | 727    | RR+PAS+LOV+Kinase                     | 6        |
| 5   | <i>Haloarcula argentinensis</i> DSM 12282    | EuA   | M0KWF6                | WP_005534440.1            | 748    | RR+LOV+GAF+Kinase                     | 7        |
|     |                                              |       | M0KU22                | WP_005535584.1            | 726    | RR+PAS+LOV+Kinase                     | 8        |
| 6   | <i>Haloarcula californiae</i> ATCC 33799     | EuA   | M0KKE6                | WP_007188243.1            | 726    | RR+PAS+LOV+Kinase                     | 9        |
|     |                                              |       | M0JSQ9                | WP_007190397.1            | 748    | RR+LOV+GAF+Kinase                     | 10       |
| 7   | <i>Haloarcula hispanica</i> ATCC 33960       | EuA   | G0HRB1                | YP_004796084.1            | 748    | RR+PAS+LOV+GAF+Kinase                 | 11       |
| 8   | <i>Haloarcula japonica</i> DSM 6131          | EuA   | M0L9V9                | WP_004592775.1            | 748    | RR+LOV+GAF+Kinase                     | 12       |
|     |                                              |       | M0LBV1                | WP_004593543.1            | 726    | RR+PAS+LOV+Kinase                     | 13       |
|     |                                              |       | M0LAY8                | WP_004594204.1            | 599    | RR+LOV+Kinase                         | 14       |
| 9   | <i>Haloarcula marismortui</i> ATCC43049      | EuA   | Q5UWI7                | YP_138072.1               | 2306   | PAS+GAF+4PAS+GAF+4PAS+LOV+3PAS+Kinase | 15       |
|     |                                              |       | Q5V5P7                | YP_134861.1               | 726    | RR+PAS+LOV+PAS+Kinase                 | 16       |
|     |                                              |       | Q5V3S3                | YP_135535.1               | 748    | RR+PAS+LOV+GAF+Kinase                 | 17       |
| 10  | <i>Haloarcula sinaiensis</i> ATCC 33800      | EuA   | M0K0A6                | WP_004961457.1            | 748    | RR+LOV+GAF+Kinase                     | 18       |
|     |                                              |       | M0JUG2                | WP_004963306.1            | 726    | RR+PAS+LOV+Kinase                     | 19       |
|     |                                              |       | M0JKN0                | WP_004966422.1            | 870    | RR+PAS+LOV+3PAS                       | 20       |
| 11  | <i>Haloarcula vallismortis</i> ATCC 29715    | EuA   | M0IY14                | WP_004517958.1            | 748    | RR+PAS+LOV+GAF+Kinase                 | 21       |
|     |                                              |       | M0JF54                | WP_004516790.1            | 726    | RR+PAS+LOV+Kinase                     | 22       |
| 12  | <i>Halobiforma lacisalsi</i> AJ5             | EuA   |                       | WP_007141411.1            | 1462   | GAF+LOV+3PAS+2GAF+HTH                 | 23       |
|     |                                              |       |                       | WP_007142266.1            | 628    | PAS+LOV+HTH                           | 24       |
| 13  | <i>Halobiforma nitratireducens</i> JCM 10879 | EuA   | M0LF83                | WP_006674107.1            | 633    | PAS+LOV+HTH                           | 25       |
| 14  | <i>Haloferax alexandrinus</i> JCM 10717      | EuA   | M0ISC6                | WP_006600750.1            | 658    | LOV+GAF+HTH                           | 26       |
|     |                                              |       | M0I6S2                | WP_006600643.1            | 858    | LOV+4PAS+Kinase                       | 27       |
|     |                                              |       |                       | WP_004062881.1            | 725    | RR+PAS+LOV+PAS+Kinase                 | 28       |
| 15  | <i>Haloferax denitrificans</i> ATCC 35960    | EuA   | M0JKW4                | WP_004967303.1            | 639    | RR+LOV+PAS+Kinase                     | 29       |
|     |                                              |       | M0JGT6                | WP_004967308.1            | 390    | RR+LOV                                | 30       |
|     |                                              |       | M0JA63                | WP_004969028.1            | 659    | LOV+GAF+HTH                           | 31       |
|     |                                              |       | M0JQQ3                | WP_004970246.1            | 858    | LOV+3PAS+Kinase                       | 32       |
| 16  | <i>Haloferax elongans</i> ATCC BAA-1513      | EuA   | M0HS61                | WP_008322780.1            | 661    | LOV+GAF+HTH                           | 33       |
| 17  | <i>Haloferax gibbonsii</i> ATCC 33959        | EuA   | M0H5U8                | WP_004975760.1            | 716    | RR+PAS+LOV+PAS+Kinase                 | 34       |
|     |                                              |       | M0H5P9                | WP_004975752.1            | 369    | RR+LOV                                | 35       |
|     |                                              |       | M0HJ57                | WP_004973634.1            | 658    | LOV+GAF+HTH                           | 36       |
|     |                                              |       | M0HIK5                | WP_004972991.1            | 870    | RR+LOV+3PAS+Kinase                    | 37       |
| 18  | <i>Haloferax larsenii</i> JCM 13917          | EuA   | M0GTD6                | WP_007544473.1            | 661    | LOV+GAF+HTH                           | 38       |
| 19  | <i>Haloferax lucentense</i> DSM 14919        | EuA   | M0GV43                | ELZ87863.1/WP_004062881.1 | 725    | RR+PAS+LOV+PAS+Kinase                 | 39       |
|     |                                              |       | M0GGW3                | WP_004065380.1            | 658    | LOV+GAF+HTH                           | 40       |
|     |                                              |       | M0GFK0                | WP_004065100.1            | 858    | LOV+3PAS+Kinase                       | 41       |
| 20  | * <i>Haloferax mediterranei</i> ATCC 33500   | EuA   | I3R1D3                | YP_006348030.1            | 667    | LOV+GAF+HTH                           | 42       |
| 21  | <i>Haloferax mucosum</i> ATCC BAA-1512       | EuA   | M0IDW1                | WP_008319778.1            | 659    | LOV+GAF+HTH                           | 43       |

|    |                                             |      |        |                           |      |                               |    |
|----|---------------------------------------------|------|--------|---------------------------|------|-------------------------------|----|
| 22 | <i>Haloferax prahovense</i> DSM 18310       | EuA  | M0G333 | WP_008095971.1            | 712  | RR+PAS+LOV+PAS+Kinase         | 44 |
|    |                                             |      | M0GT38 | WP_008091440.1            | 658  | LOV+GAF+HTH                   | 45 |
|    |                                             |      | M0GL79 | WP_008091948.1            | 871  | LOV+3PAS+Kinase               | 46 |
| 23 | <i>Haloferax</i> sp. ATCC BAA-644           | EuA  |        | WP_008576999.1            | 658  | LOV+GAF+HTH                   | 47 |
|    |                                             |      |        | WP_008577397.1            | 858  | LOV+3PAS+Kinase               | 48 |
|    | <i>Haloferax</i> sp. ATCC BAA-645           | EuA  | M0G7U5 | WP_008577920.1            | 731  | RR+PAS+LOV+PAS+Kinase         | 49 |
|    |                                             |      |        | WP_008577397.1            | 858  | LOV+3PAS+Kinase               | 50 |
|    |                                             |      |        | ELZ63079.1/WP_008576999.1 | 658  | LOV+GAF+HTH                   | 51 |
|    | <i>Haloferax</i> sp. ATCC BAA-646           | EuA  | M0FM96 | WP_008579033.1            | 817  | RR+PAS+LOV+PAS+Kinase         | 52 |
|    |                                             |      |        | WP_008577397.1            | 858  | LOV+3PAS+Kinase               | 53 |
|    |                                             |      | M0FI62 | ELZ58294.1/WP_008576999.1 | 658  | LOV+GAF+HTH                   | 54 |
|    | <i>Haloferax</i> sp. BAB2207                | EuA  | L5NY38 | WP_008605787.1            | 646  | RR+PAS+LOV+PAS+Kinase         | 55 |
|    |                                             |      | L5NW28 | WP_008606020.1            | 709  | LOV+3PAS+Kinase               | 56 |
|    |                                             |      | L5NIY0 | WP_008609214.1            | 575  | LOV+GAF+HTH                   | 57 |
| 24 | <i>Haloferax sulfurifontis</i> ATCC BAA-897 | EuA  | M0I143 | WP_007276041.1            | 640  | RR+LOV+PAS+Kinase             | 58 |
|    |                                             |      | M0HZH1 | WP_007276043.1            | 369  | RR+PAS+LOV                    | 59 |
|    |                                             |      | M0IBQ3 | WP_007275007.1            | 606  | LOV+GAF+HTH                   | 60 |
|    |                                             |      | M0HVS1 | WP_007275764.1            | 858  | LOV+PAS+Kinase                | 61 |
| 25 | <i>Haloferax volcanii</i> DSM 3757          | Eu A | D4GU42 | YP_003536054.1            | 652  | RR+PAS+LOV+Kinase             | 62 |
|    |                                             |      | D4GSN6 | YP_003534694.1            | 858  | LOV+3PAS+Kinase               | 63 |
|    |                                             |      | D4GZU7 | YP_003534395.1            | 658  | LOV+GAF+HTH                   | 64 |
| 26 | <i>Halonotius</i>                           | EuA  |        | WP_021039170.1            | 828  | 2PAS+LOV+2PAS+Kinase          | 65 |
| 27 | <i>Halonotius</i> sp. J07HN4                | EuA  |        | WP_021040232.1            | 763  | PAS+LOV+PAS+Kinase            | 66 |
|    |                                             |      |        | WP_021040161.1            | 1018 | 2PAS+LOV+GAF+2PAS+Kinase      | 67 |
|    |                                             |      |        | WP_021039668.1            | 966  | RR+PAS+LOV+2PAS+Kinase        | 68 |
| 28 | <i>Halonotius</i> sp. J07HN6                | EuA  |        | WP_021062171.1            | 335  | RR+LOV (truncated LOV domain) | 69 |
|    |                                             |      |        | WP_021061359.1            | 419  | PAS+LOV                       | 70 |
|    |                                             |      |        | WP_021061848.1            | 697  | PAS+LOV+PAS+Kinase            | 71 |
| 29 | <i>Halophilic archaeon</i> DL31             | EuA  | G2MKJ0 | YP_004807311.1            | 400  | LOV+Kinase                    | 72 |
| 30 | <i>Halophilic archaeon</i> J07HX64          | EuA  |        | WP_021044206.1            | 666  | RR+LOV+HTH                    | 73 |
| 31 | <i>Halopiger xanaduensis</i> DSM 18323      | Eu A | F8D4L2 | YP_004596219.1            | 658  | PAS+LOV+GAF+HTH               | 74 |
| 32 | <i>Haloquadratum walsbyi</i>                | EuA  |        | WP_021050808.1            | 851  | RR+PAS+LOV+PAS+Kinase         | 75 |
| 33 | <i>Halorhabdus tiamatea</i> SARL4B          | Eu A | F7PMY2 | YP_008375964.1            | 677  | RR+LOV+GAF+HTH                | 76 |
| 34 | <i>Halorhabdus utahensis</i> DSM 12940      | EuA  | C7NQP5 | YP_003129237.1            | 680  | RR+LOV+GAF+HTH                | 77 |
| 35 | <i>Halorubrum aidingense</i> JCM 13560      | EuA  | M0PCX2 | WP_008001395.1            | 596  | RR+PAS+LOV+Kinase             | 78 |
|    |                                             |      | M0PAC7 | WP_008000810.1            | 522  | RR+ LOV+Kinase                | 79 |
|    |                                             |      | M0PJA7 | WP_007998980.1            | 981  | LOV+5PAS+Kinase               | 80 |
| 36 | <i>Halorubrum arcis</i> JCM 13916           | EuA  | M0PIL7 | WP_007996097.1            | 596  | RR+PAS+LOV+Kinase             | 81 |
|    |                                             |      | M0PIN6 | WP_007996657.1            | 501  | RR+ LOV+Kinase                | 82 |
| 37 | <i>Halorubrum californiensis</i> DSM 19288  | EuA  | M0EGK2 | WP_008441071.1            | 594  | RR+PAS+LOV+Kinase             | 83 |
|    |                                             |      | M0DYT3 | WP_008445922.1            | 683  | PAS+LOV+GAF+PAS+Kinase        | 84 |
|    |                                             |      |        | WP_008443170.1            | 743  | RR+PAS+LOV+Kinase             | 85 |
|    |                                             |      | M0EG61 | WP_008441781.1            | 507  | RR+ LOV+Kinase                | 86 |
| 38 | <i>Halorubrum coriense</i> DSM 10284        | EuA  | M0E8M1 | WP_006114486.1            | 594  | RR+PAS+LOV+Kinase             | 87 |
|    |                                             |      | M0EM75 | WP_006112652.1            | 510  | RR+ LOV+Kinase                | 88 |
| 39 | <i>Halorubrum distributum</i> JCM 9100      | EuA  | M0EQI8 | WP_004597500.1            | 596  | RR+PAS+LOV+Kinase             | 89 |
|    |                                             |      | M0EQ99 | WP_004596794.1            | 502  | RR+ LOV+Kinase                | 90 |
| 40 | <i>Halorubrum hochstenium</i> ATCC 700873   | EuA  | M0F978 | WP_008584939.1            | 594  | RR+PAS+LOV+Kinase             | 91 |
|    |                                             |      | M0F8B0 | WP_008584017.1            | 486  | LOV+Kinase                    | 92 |

|    |                                                 |      |        |                |      |                        |     |
|----|-------------------------------------------------|------|--------|----------------|------|------------------------|-----|
| 41 | <i>Halorubrum kocurii</i> JCM 14978             | EuA  | M0PAC1 | WP_008847455.1 | 607  | RR+PAS+LOV+Kinase      | 93  |
|    |                                                 |      | M0NND4 | WP_008849553.1 | 720  | RR+PAS+LOV+Kinase      | 94  |
|    |                                                 |      | M0NXJ3 | WP_008848851.1 | 555  | LOV+GAF+HTH            | 95  |
|    |                                                 |      | M0P7I5 | WP_008848390.1 | 493  | RR+LOV+Kinase          | 96  |
| 42 | <i>Halorubrum lacusprofundi</i> ATCC 49239      | EuA  | B9LXB3 | YP_002567701.1 | 587  | PAS+LOV+PAS+kinase     | 97  |
|    |                                                 |      | B9LPK0 | YP_002566358.1 | 294  | LOV+Kinase             | 98  |
| 43 | <i>Halorubrum lipolyticum</i> DSM 21995         | EuA  | M0NMJ4 | WP_008007944.1 | 620  | RR+PAS+LOV+Kinase      | 99  |
|    |                                                 |      | M0NJB8 | WP_008008306.1 | 494  | LOV+Kinase             | 100 |
| 44 | <i>Halorubrum litoreum</i> JCM 13561            | EuA  | M0NPX9 | WP_008367060.1 | 596  | RR+PAS+LOV+Kinase      | 101 |
|    |                                                 |      | M0NLQ5 | WP_008367611.1 | 501  | RR+LOV+Kinase          | 102 |
| 45 | <i>Halorubrum saccharovororum</i> DSM 1137      | EuA  | M0E2F0 | WP_004047251.1 | 590  | RR+PAS+LOV+Kinase      | 103 |
|    |                                                 |      | M0DW79 | WP_004048308.1 | 717  | RR+PAS+LOV+PAS+Kinase  | 104 |
|    |                                                 |      | M0E4X7 | WP_004046404.1 | 475  | RR+LOV+Kinase          | 105 |
| 46 | <i>Halorubrum</i> sp. T3                        | EuA  |        | WP_017343793.1 | 596  | RR+PAS+LOV+Kinase      | 106 |
|    |                                                 |      |        | WP_017344163.1 | 506  | RR+LOV+Kinase          | 107 |
| 47 | <i>Halorubrum tebenquichense</i> DSM 14210      | EuA  | M0DVK1 | WP_006628902.1 | 1102 | RR+PAS+LOV             | 108 |
|    |                                                 |      | M0DE24 | WP_006630444.1 | 461  | LOV+Kinase             | 109 |
| 48 | <i>Halorubrum terrestre</i> JCM 10247           | EuA  | M0D8R1 | WP_007345452.1 | 596  | RR+PAS+LOV+Kinase      | 110 |
|    |                                                 |      | M0DD56 | WP_007345203.1 | 501  | RR+ LOV+Kinase         | 111 |
| 49 | <i>Halosimplex carlsbadense</i> 2-9-1           | EuA  | M0CWF6 | WP_006882975.1 | 972  | RR+PAS+LOV+3PAS+Kinase | 112 |
|    |                                                 |      | M0D066 | WP_006882606.1 | 652  | RR+LOV+GAF+HTH         | 113 |
|    |                                                 |      | M0D0B9 | WP_006882998.1 | 648  | GAF+PAS+LOV+Kinase     | 114 |
|    |                                                 |      |        | WP_006882499.1 | 1794 | LOV+8PAS+GAF+HTH       | 115 |
| 50 | <i>Haloterrigena limicola</i> JCM 13563         | EuA  | M0CPI1 | WP_008009308.1 | 633  | PAS+LOV+GAF+HTH        | 116 |
| 51 | <i>Haloterrigena salina</i> JCM 13891           | EuA  | M0BXZ7 | WP_008896043.1 | 643  | PAS+LOV+GAF+HTH        | 117 |
|    |                                                 |      | M0C8L1 | WP_008893875.1 | 652  | GAF+PAS+LOV+Kinase     | 118 |
| 52 | <i>Haloterrigena thermotolerans</i> DSM 11522   | EuA  | M0BP65 | WP_006650177.1 | 627  | PAS+LOV+GAF+HTH        | 119 |
| 53 | <i>Haloterrigena turkmenica</i> DSM 5511        | Eu A | D2RWH0 | YP_003402232.1 | 644  | PAS+LOV+GAF+HTH        | 120 |
|    |                                                 |      | D2RZP8 | YP_003404760.1 | 654  | GAF+PAS+LOV+Kinase     | 121 |
| 54 | <i>Halovivax asiaticus</i> JCM 14624            | Eu A | M0BRR0 | WP_007697375.1 | 674  | RR+LOV+GAF+HTH         | 122 |
| 55 | <i>Halovivax ruber</i> XH-70                    | EuA  | L0IC85 | YP_007283949.1 | 674  | LOV+GAF+HTH            | 123 |
| 56 | <i>Methanoculleus bourgensis</i> ATCC 43281     | EuA  |        | YP_006543787.1 | 630  | 2PAS+GAF+LOV+Kinase    | 124 |
|    |                                                 |      |        | YP_006545702.1 | 971  | 4PAS+LOV+Kinase        | 125 |
| 57 | <i>Methanoculleus marisnigri</i> ATCC 35101     | EuA  |        | YP_001047260.1 | 888  | 4PAS+LOV+Kinase        | 126 |
|    |                                                 |      |        | YP_001046186.1 | 630  | 2PAS+GAF+LOV+Kinase    | 127 |
|    |                                                 |      | A3CUN9 | YP_001047071.1 | 753  | 2PAS+LOV+Kinase        | 128 |
| 58 | <i>Methanobolus psychrophilus</i> R15           | EuA  |        | YP_006922864.1 | 541  | LOV+Kinase+RR          | 129 |
| 59 | <i>Methanoplanus limicola</i> DSM 2279          | EuA  | H1YYA6 | WP_004075781.1 | 476  | PAS+LOV+PAS+Kinase     | 130 |
| 60 | <i>Methanosphaerula palustris</i> ATCC BAA-1556 | EuA  |        | YP_002465170.1 | 968  | PAS+LOV+3PAS+Kinase    | 131 |
| 61 | <i>Natrialba chahannaoensis</i> JCM 10990       | EuA  | M0B9X5 | WP_006165579.1 | 478  | RR+LOV+Kinase          | 132 |
| 62 | <i>Natrialba hulunbeirensis</i> JCM 10989       | EuA  | L9ZYC6 | WP_006653494.1 | 478  | RR+LOV+Kinase          | 133 |
|    |                                                 |      | M0AA97 | WP_006651477.1 | 736  | RR+2PAS+LOV+Kinase     | 134 |
| 63 | <i>Natrialba magadii</i> ATCC 43099             | Eu A | D3SVK4 | YP_003480174.1 | 477  | RR+LOV+Kinase          | 135 |
| 64 | <i>Natrinema altunense</i> JCM 12890            | Eu A | L9ZYN2 | WP_007107921.1 | 629  | PAS+LOV+HTH            | 136 |
| 65 | <i>Natrinema gari</i> JCM 14663                 | Eu A | L9YWZ4 | WP_008457298.1 | 630  | PAS+LOV+HTH            | 137 |
| 66 | <i>Natrinema pallidum</i> DSM 3751              | Eu A | L9YJK9 | WP_006187119.1 | 649  | PAS+LOV+HTH            | 138 |
| 67 | <i>Natrinema pellirubrum</i> DSM 15624          | Eu A | L9YNP9 | WP_006181371.1 | 657  | LOV+GAF+HTH            | 139 |
|    |                                                 |      | L0JQR8 | YP_007281871.1 | 627  | PAS+LOV+GAF+HTH        | 140 |
| 68 | <i>*Natrinema</i> sp. (strain J7-2)             | EuA  | I7C1F5 | YP_006543291.1 | 630  | PAS+LOV+HTH            | 141 |

|    |                                                   |     |        |                |      |                        |     |
|----|---------------------------------------------------|-----|--------|----------------|------|------------------------|-----|
| 69 | <i>Natrinema versiforme</i> JCM 10478             | EuA | L9XNH7 | WP_006432901.1 | 717  | RR+PAS+LOV+PAS+Kinase  | 142 |
|    |                                                   |     | L9YBA9 | WP_006429256.1 | 631  | PAS+LOV+HTH            | 143 |
| 70 | <i>Natronobacterium gregoryi</i> SP2              | EuA | L0AGT8 | YP_007176754.1 | 616  | PAS+LOV+GAF+HTH        | 144 |
|    |                                                   |     | L0AIG8 | YP_007177421.1 | 1517 | GAF+LOV+4PAS+2GAF+HTH  | 145 |
| 71 | <i>Natronococcus amylolyticus</i> DSM 10524       | EuA | L9XFR4 | WP_005554108.1 | 618  | PAS+LOV+HTH            | 146 |
|    | <i>Natronococcus amylolyticus</i> DSM 10524       | EuA |        | WP_005554006.1 | 634  | LOV+PAS+GAF+Kinase     | 147 |
| 72 | <i>Natronococcus jeotgali</i> DSM 18795           | EuA | L9WMX9 | WP_008427349.1 | 619  | PAS+LOV+HTH            | 148 |
| 73 | <i>Natronococcus occultus</i> SP4                 | EuA | L0JXN1 | YP_007308413.1 | 634  | LOV+PAS+GAF+Kinase     | 149 |
|    |                                                   |     | L0JTP7 | YP_007308142.1 | 616  | PAS+LOV+HTH            | 150 |
| 74 | <i>Natronolimnobius innermongolicus</i> JCM 12255 | EuA | L9XAN4 | WP_007258756.1 | 655  | RR+PAS+LOV+PAS+Kinase  | 151 |
|    |                                                   |     | L9XE91 | WP_007258481.1 | 645  | PAS+LOV+GAF+HTH        | 152 |
| 75 | <i>Natronomonas moolapensis</i> 8.8.11            | EuA |        | YP_007486593.1 | 583  | LOV+PAS+Kinase         | 153 |
|    |                                                   |     |        | YP_007486271.1 | 673  | RR+LOV+GAF+HTH         | 154 |
|    |                                                   |     |        | YP_007487143.1 | 723  | LOV+Kinase             | 155 |
|    |                                                   |     |        | YP_007488415.1 | 652  | RR+LOV+GAF+PAS         | 156 |
|    |                                                   |     |        | YP_007487711.1 | 583  | PAS+LOV+PAS+Kinase     | 157 |
| 76 | <i>Natronomonas pharaonis</i> DSM 2160            | EuA | Q3ITW5 | YP_325987.1    | 681  | RR+LOV+GAF+HTH         | 158 |
|    |                                                   |     | Q3IM51 | YP_327664.1    | 596  | PAS+LOV+PAS+Kinase     | 159 |
| 77 | <i>Natronorubrum bangense</i> JCM 10635           | EuA | L9WG87 | WP_006066370.1 | 646  | PAS+LOV+HTH            | 160 |
|    |                                                   |     |        | WP_006067023.1 | 480  | LOV+PAS+Kinase         | 161 |
| 78 | <i>Natronorubrum sulfidifaciens</i> JCM 14089     | EuA | L9W7D2 | WP_008162495.1 | 638  | PAS+LOV+HTH            | 162 |
| 79 | <i>Natronorubrum tibetense</i>                    | EuA |        | WP_006090010.1 | 1005 | PAS+LOV+3PAS+Kinase    | 163 |
| 80 | <i>Natronorubrum tibetense</i> GA33               | EuA | L9W0I4 | WP_006088978.1 | 646  | PAS+LOV+HTH            | 164 |
|    |                                                   |     | L9VKX1 | WP_006092104.1 | 563  | PAS+LOV+PAS+Kinase     | 165 |
| 81 | <i>Salinarchaeum</i> sp. Harcht-Bsk1              | EuA |        | YP_008054154.1 | 874  | RR+PAS+LOV+2PAS+Kinase | 166 |
| 82 | <i>Halogeometricum borinquense</i> ATCC 700274    | EuA | E4NMD1 | YP_004036781.1 | 648  | GAF+PAS+LOV+Kinase     | 167 |
|    |                                                   |     |        |                |      |                        | 1   |
