# Supplementary material for: From Plant Infectivity to Growth Patterns: The Role of Blue-Light Sensing in the Prokaryotic World
Source: MDPI journal article supplement (doi:10.3390/plants3010070), 2014-01-27
Supplement: s1 [file s1]

## Bacterial BLUF domains

| Nr. | Species/strain                                                         | Group | Accession nr. Uniprot | Accession nr. NCBI | aa nr. | Domains    |    |
|-----|------------------------------------------------------------------------|-------|-----------------------|--------------------|--------|------------|----|
| 1   | <i>Enterococcus gallinarum</i> EGD-AAK12                               | F     |                       | ERE59647.1         | 405    | BLUF+EAL   | 1  |
| 2   | <i>Actinomycetospira chiangmaiensis</i>                                | Ac    |                       | WP_018332181.1     | 148    | Short-BLUF | 2  |
|     |                                                                        |       |                       | WP_018331556.1     | 175    | Short-BLUF | 3  |
|     |                                                                        |       |                       | WP_018332897.1     | 150    | Short-BLUF | 4  |
|     |                                                                        |       |                       | WP_018331430.1     | 141    | Short-BLUF | 5  |
| 3   | <i>Actinoplanes</i> sp. N902-109                                       | Ac    | R4LLI6                | YP_007952341.1     | 135    | Short-BLUF | 6  |
| 4   | <i>Clavibacter michiganensis</i> subsp. <i>michiganensis</i> NCPPB 382 | Ac    | A5CNT4                | YP_001221435.1     | 142    | Short-BLUF | 7  |
|     |                                                                        |       | A5CM94                | YP_001220898.1     | 148    | Short-BLUF | 8  |
| 5   | <i>Clavibacter michiganensis</i> subsp. <i>nebraskensis</i> NCPPB 2581 | Ac    | M5B6Z4                | YP_007684954.1     | 142    | Short-BLUF | 9  |
|     |                                                                        |       | M5B789                | YP_007684430.1     | 139    | Short-BLUF | 10 |
| 6   | <i>Clavibacter michiganensis</i> subsp. <i>sepedonicus</i> ATCC 33113  | Ac    | B0RBP8                |                    | 126    | Short-BLUF | 11 |
|     |                                                                        |       | B0RFL5                | YP_001710824.1     | 142    | Short-BLUF | 12 |
| 7   | <i>Corynebacterium efficiens</i> DSM 44549                             | Ac    | Q8FMY2                | NP_738977.1        | 158    | Short-BLUF | 13 |
| 8   | <i>Corynebacterium maris</i> DSM 45190                                 | Ac    | S5TI47                | YP_008371038.1     | 159    | Short-BLUF | 14 |
| 9   | <i>Curtobacterium flaccumfaciens</i>                                   | Ac    |                       | WP_017888306.1     | 142    | Short-BLUF | 15 |
|     |                                                                        |       |                       | WP_017888712.1     | 190    | Short-BLUF | 16 |
| 10  | <i>Curtobacterium</i> sp. B18                                          | Ac    |                       | WP_022907696.1     | 142    | Short-BLUF | 17 |
|     |                                                                        |       |                       | WP_022907690.1     | 156    | Short-BLUF | 18 |
|     | <i>Curtobacterium</i> sp. B8                                           | Ac    |                       | WP_022902403.1     | 109    | Short-BLUF | 19 |
|     |                                                                        |       |                       | WP_022904642.1     | 168    | Short-BLUF | 20 |
|     |                                                                        |       |                       | WP_022902388.1     | 149    | Short-BLUF | 21 |
|     |                                                                        |       |                       | WP_022902223.1     | 139    | Short-BLUF | 22 |
| 11  | <i>Dietzia alimentaria</i>                                             | Ac    |                       | WP_010540020.1     | 158    | Short-BLUF | 23 |
| 12  | <i>Dietzia</i> sp. UCD-THP                                             | Ac    |                       | WP_017837588.1     | 160    | Short-BLUF | 24 |
|     |                                                                        |       |                       | WP_017836468.1     | 158    | Short-BLUF | 25 |
| 13  | <i>Ilumatobacter coccineus</i> YM16-304                                | Ac    | M4ZW07                | YP_007562816.1     | 353    | BLUF+GGDEF | 26 |
| 14  | <i>Leifsonia xyli</i> subsp. <i>cynodontis</i> DSM 46306               | Ac    |                       | YP_008579210.1     | 168    | Short-BLUF | 27 |
| 15  | <i>Leifsonia xyli</i> subsp. <i>xyli</i>                               | Ac    | Q6AGS2                | YP_061528.1        | 145    | Short-BLUF | 28 |
| 16  | <i>Leucobacter chromiirensistens</i>                                   | Ac    |                       | WP_010155083.1     | 154    | Short-BLUF | 29 |
| 17  | <i>Microbacterium maritopicum</i> MF109                                | Ac    | T5KEX1                | WP_021201284.1     | 162    | Short-BLUF | 30 |
| 18  | <i>Microbacterium paraoxydans</i>                                      | Ac    |                       | WP_018186897.1     | 149    | Short-BLUF | 31 |
|     |                                                                        |       |                       | WP_018187668.1     | 142    | Short-BLUF | 32 |
| 19  | <i>Microbacterium</i> sp. 11MF                                         | Ac    |                       | WP_020098083.1     | 149    | Short-BLUF | 33 |
|     |                                                                        |       |                       | WP_020098408.1     | 142    | Short-BLUF | 34 |
|     | <i>Microbacterium</i> sp. B19                                          | Ac    |                       | WP_022879455.1     | 146    | Short-BLUF | 35 |
|     | <i>Microbacterium</i> sp. TS-1                                         | Ac    |                       | GAD34866.1         | 156    | Short-BLUF | 36 |
|     | <i>Microbacterium</i> sp. UCD-TDU                                      | Ac    |                       | WP_017829376.1     | 174    | Short-BLUF | 37 |
|     |                                                                        |       |                       | WP_017829365.1     | 193    | Short-BLUF | 38 |
| 20  | <i>Microbacterium testaceum</i> (strain StLB037)                       | Ac    | E8NB71                | YP_004224598.1     | 145    | Short-BLUF | 39 |
| 21  | <i>Afipia</i> sp. 1NLS2                                                | P(α)  | D6V881                | WP_009340159.1     | 151    | Short-BLUF | 40 |
| 22  | <i>Ahrensia</i> sp. R2A130                                             | P(α)  | E0MSP0                | WP_009758676.1     | 125    | Short-BLUF | 41 |
| 23  | <i>alpha</i> proteobacterium BAL199                                    | P(α)U | A8TQR5                | WP_007672921.1     | 124    | Short-BLUF | 42 |
| 24  | <i>alpha</i> proteobacterium JLT2015                                   | P(α)U | M2T6L9                | WP_008603323.1     | 133    | Short-BLUF | 43 |
| 25  | <i>alpha</i> proteobacterium L41A                                      | P(α)U |                       | WP_017506466.1     | 135    | Short-BLUF | 44 |
| 26  | <i>alpha</i> proteobacterium SCGC AAA076-C03                           | P(α)U |                       | WP_020057179.1     | 142    | Short-BLUF | 45 |
| 27  | <i>alpha</i> proteobacterium SCGC AAA298-K06                           | P(α)U |                       | WP_020044700.1     | 140    | Short-BLUF | 46 |
| 28  | <i>Amorphus coralli</i>                                                | P(α)  |                       | WP_018701439.1     | 148    | Short-BLUF | 47 |
| 29  | <i>Asticcacaulis benevestitus</i>                                      | P(α)  |                       | WP_018084049.1     | 161    | Short-BLUF | 48 |
|     |                                                                        |       |                       | WP_023447472.1     | 163    | Short-BLUF | 49 |

|    |                                               |      |        |                               |     |            |     |
|----|-----------------------------------------------|------|--------|-------------------------------|-----|------------|-----|
| 30 | <i>Asticcacaulis biprosthecum</i> C19         | P(α) | F4QHK8 | WP_006271926.1                | 122 | Short-BLUF | 50  |
| 31 | <i>Asticcacaulis</i> sp. AC460                | P(α) |        | WP_023451483.1                | 140 | Short-BLUF | 51  |
|    | <i>Asticcacaulis</i> sp. AC466                | P(α) |        | WP_023459633.1                | 139 | Short-BLUF | 52  |
|    |                                               |      |        | WP_023456967.1                | 169 | Short-BLUF | 53  |
|    | <i>Asticcacaulis</i> sp. YBE204               | P(α) |        | WP_023462718.1                | 148 | Short-BLUF | 54  |
| 32 | <i>Aureimonas ureilytica</i>                  | P(α) |        | WP_019995874.1                | 108 | Short-BLUF | 55  |
|    |                                               |      |        | WP_019998548.1                | 138 | Short-BLUF | 56  |
| 33 | <i>Azospirillum lipoferum</i> (strain 4B)     | P(α) | G7ZDG1 | YP_004974645.1                | 163 | Short-BLUF | 57  |
|    |                                               |      | G7Z5P1 | YP_005039978.1                | 161 | Short-BLUF | 58  |
| 34 | <i>Blastomonas</i> sp. AAP53                  | P(α) |        | WP_017672203.1                | 135 | Short-BLUF | 59  |
| 35 | <i>Bradyrhizobium</i> sp. STM 3809            | P(α) | H0SXV9 | WP_008961634.1                | 151 | Short-BLUF | 60  |
|    |                                               |      | H0T8Q2 | WP_008965377.1                | 125 | Short-BLUF | 61  |
| 36 | <i>Brevundimonas abyssalis</i> TAR-001        | P(α) | U2ZDP3 | WP_021697307.1                | 100 | Short-BLUF | 62  |
| 37 | <i>Brevundimonas diminuta</i> 470-4           | P(α) | L1QEI8 | WP_003168376.1                | 133 | Short-BLUF | 63  |
|    |                                               |      | L1QGZ1 | WP_003168022.1                | 165 | Short-BLUF | 64  |
| 38 | <i>Brevundimonas diminuta</i> ATCC 11568      | P(α) | F4QZ49 | WP_003166443.1                | 136 | Short-BLUF | 65  |
|    |                                               |      | F4R104 | WP_003166654.1                | 136 | Short-BLUF | 66  |
| 39 | <i>Brevundimonas</i> sp. BAL3                 | P(α) | B4W666 | WP_008261602.1                | 136 | Short-BLUF | 67  |
|    |                                               |      | B4WEH9 | WP_008264082.1                | 151 | Short-BLUF | 68  |
|    |                                               |      | B4W667 | WP_008262982.1                | 141 | Short-BLUF | 69  |
| 40 | <i>Brevundimonas subvibrioides</i> ATCC 15264 | P(α) | D9QFJ9 | YP_003820137.1                | 133 | Short-BLUF | 70  |
|    |                                               |      | D9QF25 | YP_003818133.1                | 148 | Short-BLUF | 71  |
|    |                                               |      | D9QJR6 | YP_003817291.1                | 137 | Short-BLUF | 72  |
|    |                                               |      | D9QHQ8 | YP_003816957.1                | 129 | Short-BLUF | 73  |
|    |                                               |      | D9QN89 | YP_003817913.1                | 167 | Short-BLUF | 74  |
| 41 | <i>Caenispirillum salinarum</i> AK4           | P(α) | K9GNQ3 | WP_009542082.1                | 148 | Short-BLUF | 75  |
| 42 | <i>Caulobacter</i> sp. JGI 0001010-J14        | P(α) |        | WP_019847616.1                | 155 | Short-BLUF | 76  |
|    | <i>Caulobacter</i> sp. JGI 0001013-D04        | P(α) |        | WP_018113275.1                | 155 | Short-BLUF | 77  |
| 43 | <i>Citricella</i> sp. 357                     | P(α) | I1ASF9 | WP_009506357.1                | 135 | Short-BLUF | 78  |
|    | <i>Citricella</i> sp. SE45                    | P(α) | D0D5D9 | WP_008885899.1                | 131 | Short-BLUF | 79  |
| 44 | <i>Dinoroseobacter shibae</i> DFL 12          | P(α) | A8LL23 | YP_001534373.1                | 135 | Short-BLUF | 80  |
| 45 | <i>Fodinicurvata sediminis</i>                | P(α) |        | WP_022728487.1                | 145 | Short-BLUF | 81  |
| 46 | <i>Fulvimarina pelagi</i> HTCC2506            | P(α) | Q0G5H1 | WP_007067067.1                | 144 | Short-BLUF | 82  |
|    |                                               |      | Q0G0Q7 | WP_007068840.1                | 145 | Short-BLUF | 83  |
|    |                                               |      | Q0G114 | WP_007068733.1                | 122 | Short-BLUF | 84  |
| 47 | <i>Henriciella marina</i>                     | P(α) |        | WP_018146618.1                | 137 | Short-BLUF | 85  |
|    |                                               |      |        | WP_018146679.1                | 136 | Short-BLUF | 86  |
|    |                                               |      |        | WP_018147000.1                | 146 | Short-BLUF | 87  |
| 48 | <i>Hoeflea phototrophica</i> DFL-43           | P(α) | A9DDP2 | WP_007196455.1                | 130 | Short-BLUF | 88  |
| 49 | <i>Hyphomonas neptunium</i> ATCC 15444        | P(α) | Q0C3J3 | YP_759700.1                   | 152 | Short-BLUF | 89  |
| 50 | <i>Jannaschia</i> sp. (strain CCS1)           | P(α) | Q28NL5 | YP_510722.1                   | 164 | Short-BLUF | 90  |
|    |                                               |      | Q28QR5 | YP_509972.1                   | 150 | Short-BLUF | 91  |
|    |                                               |      | Q28M24 | YP_511263.1                   | 135 | Short-BLUF | 92  |
| 51 | <i>Labrenzia aggregata</i> IAM 12614          | P(α) | A0NTY6 | WP_006935087.1                | 152 | Short-BLUF | 93  |
| 52 | <i>Labrenzia alexandrii</i> DFL-11            | P(α) | B9QVG5 | WP_008192786.1                | 152 | Short-BLUF | 94  |
| 53 | <i>Loktanella vestfoldensis</i>               | P(α) |        | WP_019955376.1                | 138 | Short-BLUF | 95  |
|    | <i>Loktanella vestfoldensis</i> SKA53         | P(α) | A3V3H6 | WP_007204263.1                | 136 | Short-BLUF | 96  |
| 54 | <i>Magnetospirillum gryphiswaldense</i>       | P(α) | A4U007 | CAM76214.1                    | 156 | Short-BLUF | 97  |
|    |                                               |      | A4U445 | CAM77652.1                    | 151 | Short-BLUF | 98  |
| 55 | <i>Maricaulis maris</i> (strain MCS10)        | P(α) | Q0AMF1 | YP_757480.1                   | 152 | Short-BLUF | 99  |
|    |                                               |      | Q0ALH8 | YP_757803.1/NP_949618.1       | 141 | Short-BLUF | 100 |
| 56 | <i>Maricaulis</i> sp. JL2009                  | P(α) |        | WP_022699434.1                | 141 | Short-BLUF | 101 |
| 57 | <i>Methylobacterium chloromethanicum</i> CM4  | P(α) | B7KRN3 | YP_002423488.1/YP_002422117.1 | 150 | Short-BLUF | 102 |

|    |                                                  |          |        |                               |     |            |     |
|----|--------------------------------------------------|----------|--------|-------------------------------|-----|------------|-----|
|    |                                                  |          | B7KN60 | YP_002423105.1                | 148 | Short-BLUF | 103 |
|    |                                                  |          | B7L1R5 | YP_002419387.1                | 150 | Short-BLUF | 104 |
|    |                                                  |          | C5B322 | YP_002965329.1                | 148 | Short-BLUF | 105 |
| 58 | <i>Methylobacterium extorquens</i> AM1           | P(α)     | C5AVI4 | YP_002961929.1/YP_001638425.1 | 155 | Short-BLUF | 106 |
|    |                                                  |          | C7CE09 | YP_003066731.1/YP_001638425.1 | 155 | Short-BLUF | 107 |
|    | <i>Methylobacterium extorquens</i> DM4           | P(α)     | C7CJD7 | YP_003070453.1                | 148 | Short-BLUF | 108 |
|    |                                                  |          | H1KED3 | WP_003597563.1/YP_002965329.1 | 148 | Short-BLUF | 109 |
|    | <i>Methylobacterium extorquens</i> DSM 13060     | P(α)     | H1KPI6 | WP_003603713.1/YP_001638425.1 | 155 | Short-BLUF | 110 |
|    |                                                  |          | A9VWG7 | YP_001637613.1                | 150 | Short-BLUF | 111 |
|    | <i>Methylobacterium extorquens</i> PA1           | P(α)     | A9W8Q2 | YP_001641472.1                | 148 | Short-BLUF | 112 |
|    |                                                  |          | A9W198 | YP_001638425.1                | 155 | Short-BLUF | 113 |
| 59 | <i>Methylobacterium mesophilicum</i> SR1.6/6     | P(α)     | M7XWX4 | WP_010687537.1                | 294 | BLUF       | 114 |
|    |                                                  |          | M7XZR2 | WP_010683805.1                | 155 | Short-BLUF | 115 |
| 60 | <i>Methylobacterium nodulans</i> ORS 2060        | P(α)     | B8IB70 | YP_002497588.1                | 155 | Short-BLUF | 116 |
| 61 | <i>Methylobacterium populi</i> ATCC BAA-705      | P(α)     | B1ZGT3 | YP_001927146.1                | 162 | Short-BLUF | 117 |
|    |                                                  |          | B1Z908 | YP_001923601.1                | 155 | Short-BLUF | 118 |
| 62 | <i>Methylobacterium radiotolerans</i> ATCC 27329 | P(α)     | B1M482 | YP_001757060.1                | 309 | Short-BLUF | 119 |
|    |                                                  |          | B1M108 | YP_001755241.1                | 139 | Short-BLUF | 120 |
|    |                                                  |          | B1LTA6 | YP_001753095.1                | 143 | Short-BLUF | 121 |
|    |                                                  |          | B1M0G5 | YP_001758170.1                | 155 | Short-BLUF | 122 |
| 63 | <i>Methylobacterium</i> sp. 285MFTsu5.1          | P(α)     |        | WP_020092935.1                | 155 | Short-BLUF | 123 |
|    | <i>Methylobacterium</i> sp. 4-46                 | P(α)     | B0UJP3 | YP_001769419.1                | 150 | Short-BLUF | 124 |
|    |                                                  |          | B0ULI8 | YP_001770966.1                | 155 | Short-BLUF | 125 |
|    |                                                  |          | B0U8I2 | YP_001768746.1                | 296 | Short-BLUF | 126 |
|    |                                                  |          | B0UQT1 | YP_001771351.1                | 162 | Short-BLUF | 127 |
|    |                                                  |          | B0UIK0 | YP_001770814.1                | 373 | Short-BLUF | 128 |
|    | <i>Methylobacterium</i> sp. 77                   | P(α)     |        | WP_019905219.1                | 155 | Short-BLUF | 129 |
|    | <i>Methylobacterium</i> sp. 88A                  | P(α)     |        | WP_018045976.1                | 150 | Short-BLUF | 130 |
|    |                                                  |          |        | WP_018044868.1                | 155 | Short-BLUF | 131 |
|    | <i>Methylobacterium</i> sp. GXF4                 | P(α)     | I9CMR0 | WP_007562637.1                | 306 | Short-BLUF | 132 |
|    |                                                  |          | I9LE30 | WP_007566415.1                | 155 | Short-BLUF | 133 |
|    | <i>Methylobacterium</i> sp. MB200                | P(α)     |        | WP_017484131.1                | 156 | Short-BLUF | 134 |
|    |                                                  |          |        | WP_017487136.1                | 155 | Short-BLUF | 135 |
|    | <i>Methylobacterium</i> sp. WSM2598              | P(α)     |        | WP_018261940.1                | 290 | Short-BLUF | 136 |
| 64 | <i>Methylocystis rosea</i>                       | P(α)     |        | WP_018408523.1                | 134 | Short-BLUF | 137 |
| 65 | <i>Methylocystis</i> sp. (strain SC2)            | P(α)     | J7QPQ2 | YP_006590526.1                | 134 | Short-BLUF | 138 |
| 66 | <i>Oceanicaulis alexandrii</i>                   | P(α)     |        | WP_022700825.1                | 149 | Short-BLUF | 139 |
| 67 | <i>Oceaniovalibus guishaninsula</i> JLT2003      | P(α)     | K2HTA6 | WP_007425238.1                | 138 | Short-BLUF | 140 |
| 68 | <i>Octadecabacter antarcticus</i> 307            | P(α)     | M9RHP8 | YP_007706545.1                | 143 | Short-BLUF | 141 |
|    |                                                  |          | M9R7E3 | YP_007705193.1                | 170 | Short-BLUF | 142 |
|    |                                                  |          | M9RA14 | YP_007705656.1                | 170 | Short-BLUF | 143 |
|    |                                                  |          | M9RGN7 | YP_007705589.1                | 158 | Short-BLUF | 144 |
| 69 | <i>Octadecabacter arcticus</i> 238               | P(α)     | M9RPU8 | YP_007699880.1                | 146 | Short-BLUF | 145 |
| 70 | <i>Pannonibacter phragmitetus</i>                | P(α)     |        | WP_019963279.1                | 150 | Short-BLUF | 146 |
|    |                                                  |          |        | WP_019963280.1                | 152 | Short-BLUF | 147 |
| 71 | <i>Paracoccus</i> sp. N5                         | P(α)     |        | WP_017999944.1                | 138 | Short-BLUF | 148 |
| 72 | <i>Paracoccus zeaxanthinifaciens</i>             | P(α)     |        | WP_022708278.1                | 141 | Short-BLUF | 149 |
| 73 | <i>Parvibaculum lavamentivorans</i> DS-1         | P(α)     | A7HQ46 | YP_001411686.1/WP_011995320.1 | 153 | Short-BLUF | 150 |
| 74 | <i>Phaeosporillum molischianum</i> DSM 120       | P(α)     | H8FX83 | WP_002730899.1                | 150 | Short-BLUF | 151 |
| 75 | <i>Phenylobacterium zucineum</i> HLK1            | P(α)     | B4RAQ0 | YP_002132077.1                | 166 | Short-BLUF | 152 |
| 76 | <i>Polymorphum gilvum</i> LMG 25793              | P(α)poly | F2J5Y4 | YP_004304542.1                | 156 | Short-BLUF | 153 |
| 77 | <i>Porphyrobacter</i> sp. AAP82                  | P(α)     |        | WP_017663773.1                | 152 | Short-BLUF | 154 |
|    |                                                  |          |        | WP_017663774.1                | 130 | Short-BLUF | 155 |

|    |                                                                        |      |        |                            |     |                           |     |
|----|------------------------------------------------------------------------|------|--------|----------------------------|-----|---------------------------|-----|
| 78 | <i>Pseudovibrio</i> sp. JE062                                          | P(α) | B6R848 | WP_008551887.1             | 152 | Short-BLUF                | 156 |
| 79 | <i>Puniceispirillum marinum</i> (strain IMCC1322)                      | P(α) | D5BS69 | YP_003551200.1             | 411 | RRF-BLUF                  | 157 |
| 80 | <i>Rhodobacter</i> sp. AKP1                                            | P(α) | L1KCR3 | WP_009563298.1             | 140 | Short-BLUF                | 158 |
|    |                                                                        |      | L1K965 | WP_009564586.1             | 450 | BLUF+SCHICH               | 159 |
| 81 | <i>Rhodobacter sphaeroides</i> ( <i>Rhodopseudomonas sphaeroides</i> ) | P(α) | Q53119 | YP_351608.1                | 450 | BLUF+SCHICH               | 160 |
|    | <i>Rhodobacter sphaeroides</i> ATCC 17023/2.4.1                        | P(α) | Q3J677 | YP_351608.1                | 450 | BLUF+SCHICH <sup>II</sup> | 161 |
|    |                                                                        |      | Q3IV98 | YP_345277.1                | 134 | Short-BLUF                | 162 |
|    |                                                                        |      | Q3IYE4 | YP_354341.1/WP_011338827.1 | 140 | Short-BLUF                | 163 |
|    | <i>Rhodobacter sphaeroides</i> ATCC 17025                              | P(α) | A4WX15 | YP_001169234.1             | 448 | BLUF+SCHICH               | 164 |
|    |                                                                        |      | A4WZZ2 | YP_001170261.1             | 135 | Short-BLUF                | 165 |
|    | <i>Rhodobacter sphaeroides</i> ATCC 17029                              | P(α) | A3PG69 | YP_001042107.1             | 450 | BLUF+SCHICH               | 166 |
|    |                                                                        |      | A3PNV7 | YP_001044795.1             | 140 | Short-BLUF                | 167 |
|    | <i>Rhodobacter sphaeroides</i> KD131                                   | P(α) | B9KRZ4 | YP_002527323.1             | 450 | BLUF+SCHICH               | 168 |
|    |                                                                        |      | B9KPY5 | YP_002527021.1             | 128 | Short-BLUF                | 169 |
|    | <i>Rhodobacter sphaeroides</i> WS8N                                    | P(α) | F3U4S4 | WP_002724946.1             | 174 | BLUF+TETR                 | 170 |
|    |                                                                        |      | F5M0G5 | EGJ22762.1/YPP_001044795.1 | 140 | Short-BLUF                | 171 |
|    |                                                                        |      | F5M357 | WP_002722303.1             | 450 | BLUF+SCHICH               | 172 |
| 82 | <i>Rhodobacterales bacterium</i> HTCC2255                              | P(α) | Q0FFK4 | WP_008034321.1             | 142 | Short-BLUF                | 173 |
|    | <i>Rhodobacterales bacterium</i> Y4I                                   | P(α) | B6BAZ4 | WP_008557343.1             | 145 | Short-BLUF                | 174 |
| 83 | <i>Rhodopseudomonas palustris</i> (strain HaA2)                        | P(α) | Q2J2T2 | YP_484139.1                | 141 | Short-BLUF                | 175 |
|    | <i>Rhodopseudomonas palustris</i> BisA53                               | P(α) | Q07KQ3 | YP_782461.1                | 202 | Short-BLUF                | 176 |
|    |                                                                        |      | Q07NU1 | YP_781373.1                | 172 | Short-BLUF                | 177 |
|    |                                                                        |      | Q07V95 | YP_779119.1                | 146 | Short-BLUF                | 178 |
|    |                                                                        |      | Q07LL8 | YP_782146.1                | 134 | Short-BLUF                | 179 |
|    | <i>Rhodopseudomonas palustris</i> BisB18                               | P(α) | Q211J0 | YP_533265.1                | 225 | Short-BLUF                | 180 |
|    |                                                                        |      | Q21C17 | YP_530388.1                | 147 | Short-BLUF                | 181 |
|    |                                                                        |      | Q214S4 | YP_532431.1                | 131 | Short-BLUF                | 182 |
|    | <i>Rhodopseudomonas palustris</i> CGA009                               | P(α) | Q6NCF0 | NP_945875.1                | 147 | Short-BLUF                | 183 |
|    |                                                                        |      | Q6N1X0 | NP_949618.1                | 157 | Short-BLUF                | 184 |
|    |                                                                        |      | Q6N4H0 | NP_948706.1                | 156 | Short-BLUF                | 185 |
|    | <i>Rhodopseudomonas palustris</i> DX-1                                 | P(α) | E6VP72 | YP_004108354.1             | 148 | Short-BLUF                | 186 |
|    |                                                                        |      | E6VKR4 | YP_004106926.1             | 147 | Short-BLUF                | 187 |
|    |                                                                        |      | E6VPR9 | YP_004110781.1             | 157 | Short-BLUF                | 188 |
|    | <i>Rhodopseudomonas palustris</i> TIE-1                                | P(α) | B3QE01 | YP_001992821.1             | 148 | Short-BLUF                | 189 |
|    |                                                                        |      | B3QBC9 | YP_001989558.1             | 147 | Short-BLUF                | 190 |
|    |                                                                        |      | B3Q6V3 | YP_001993727.1             | 157 | Short-BLUF                | 191 |
| 84 | <i>Rhodopseudomonas</i> sp. B29                                        | P(α) |        | WP_022723876.1             | 156 | Short-BLUF                | 192 |
| 85 | <i>Rhodospirillum centenum</i> ATCC 51521 / SW                         | P(α) | B6IP78 | YP_002298393.1             | 148 | Short-BLUF                | 193 |
| 86 | <i>Rhodospirillum photometricum</i> DSM 122                            | P(α) | H6SMN4 | YP_005418139.1             | 175 | Short-BLUF                | 194 |
| 87 | <i>Rhodovulum</i> sp. PH10                                             | P(α) | J6UCI9 | WP_008388881.1             | 164 | Short-BLUF                | 195 |
|    |                                                                        |      | J6UF18 | WP_008385672.1             | 144 | Short-BLUF                | 196 |
| 88 | <i>Robiginitomaculum antarcticum</i>                                   | P(α) |        | WP_017931728.1             | 138 | Short-BLUF                | 197 |
| 89 | <i>Roseibium</i> sp. TrichSKD4                                         | P(α) | E2CEP5 | WP_009466697.1             | 157 | Short-BLUF                | 198 |
| 90 | <i>Roseobacter denitrificans</i> OCh 114                               | P(α) | Q169R5 | YP_681964.1                | 131 | Short-BLUF                | 199 |
| 91 | <i>Roseobacter litoralis</i> OCh 149                                   | P(α) | F7ZIV2 | YP_004691975.1             | 131 | Short-BLUF                | 200 |
| 92 | <i>Roseobacter</i> sp. AzwK-3b                                         | P(α) | A6FLZ7 | WP_007812297.1             | 138 | Short-BLUF                | 201 |
|    | <i>Roseobacter</i> sp. CCS2                                            | P(α) | A4EDL7 | WP_008230522.1             | 158 | Short-BLUF                | 202 |
|    |                                                                        |      | A4EKD4 | WP_008234592.1             | 95  | Short-BLUF                | 203 |
|    | <i>Roseobacter</i> sp. GA101                                           | P(α) | B7RMG6 | WP_008228573.1             | 108 | Short-BLUF                | 204 |
|    | <i>Roseobacter</i> sp. MED193                                          | P(α) | A3X3E5 | WP_009811077.1             | 146 | Short-BLUF                | 205 |
|    | <i>Roseobacter</i> sp. SK209-2-6                                       | P(α) | A4EP54 | WP_008203735.1             | 143 | Short-BLUF                | 206 |
| 93 | <i>Roseovarius</i> sp. 217                                             | P(α) | A3W442 | WP_009816911.1             | 137 | Short-BLUF                | 207 |
|    | <i>Roseovarius</i> sp. HTCC2601                                        | P(α) | Q0FHM9 | WP_007792538.1             | 131 | Short-BLUF                | 208 |

|     |                                                  |      |        |                |     |                |     |
|-----|--------------------------------------------------|------|--------|----------------|-----|----------------|-----|
|     | <i>Roseovarius</i> sp. TM1035                    | P(α) | A6E0Y7 | WP_008281285.1 | 137 | Short-BLUF     | 209 |
| 94  | <i>Rubellimicrobium thermophilum</i> DSM 16684   | P(α) | S9QTZ7 | WP_021097950.1 | 142 | Short-BLUF     | 210 |
| 95  | <i>Sagittula stellata</i> E-37                   | P(α) | A3JX11 | WP_005854872.1 | 157 | Short-BLUF     | 211 |
|     |                                                  |      | A3JYT3 | WP_005855744.1 | 177 | Short-BLUF     | 212 |
| 96  | <i>Silicibacter</i> sp. TrichCH4B                | P(α) | C9CW04 | WP_009176168.1 | 144 | Short-BLUF     | 213 |
|     |                                                  |      | C9CW06 | WP_009176303.1 | 131 | Short-BLUF     | 214 |
|     | <i>Silicibacter</i> sp. TM1040                   | P(α) | Q1GF07 | YP_614021.1    | 144 | Short-BLUF     | 215 |
|     |                                                  |      | Q1GF09 | YP_614019.1    | 169 | Short-BLUF     | 216 |
| 97  | <i>Sphingobium baderi</i> LL03                   | P(α) | T0GMM3 | WP_021243582.1 | 138 | Short-BLUF     | 217 |
| 98  | <i>Sphingobium chlorophenolicum</i> L-1          | P(α) | F6ETZ8 | YP_004552311.1 | 138 | Short-BLUF     | 218 |
| 99  | <i>Sphingobium indicum</i> B90A                  | P(α) | I5BF60 | WP_007684659.1 | 138 | Short-BLUF     | 219 |
| 100 | <i>Sphingobium japonicum</i> BiD32               | P(α) | N1MG97 | WP_006950198.1 | 129 | Short-BLUF     | 220 |
|     | <i>Sphingobium japonicum</i> NBRC 101211 / UT26S | P(α) | D4Z033 | YP_003544577.1 | 138 | Short-BLUF     | 221 |
| 101 | <i>Sphingobium lactosutens</i> DS20              | P(α) | T0J2S2 | WP_021225549.1 | 133 | Short-BLUF     | 222 |
| 102 | <i>Sphingobium quisquiliarum</i> P25             | P(α) | T0H8I1 | WP_021237988.1 | 127 | Short-BLUF     | 223 |
| 103 | <i>Sphingobium</i> sp. HDIP04                    | P(α) | T0G7F1 | WP_020818413.1 | 138 | Short-BLUF     | 224 |
|     | <i>Sphingobium</i> sp. YL23                      | P(α) |        | WP_022681831.1 | 139 | Short-BLUF     | 225 |
|     |                                                  |      |        | WP_022683884.1 | 136 | Short-BLUF     | 226 |
|     |                                                  |      |        | WP_022682837.1 | 133 | Short-BLUF     | 227 |
| 104 | <i>Sphingobium ummariense</i> RL-3               | P(α) | T0IST7 | WP_021318238.1 | 137 | Short-BLUF     | 228 |
| 105 | <i>Sphingobium xenophagum</i>                    | P(α) |        | WP_019051433.1 | 129 | Short-BLUF     | 229 |
|     |                                                  |      |        | WP_017182074.1 | 129 | Short-BLUF     | 230 |
| 106 | <i>Sphingomonas</i>                              | P(α) |        | WP_010164332.1 | 130 | Short-BLUF     | 231 |
| 107 | <i>Sphingomonas elodea</i>                       | P(α) |        | WP_010543334.1 | 131 | Short-BLUF     | 232 |
| 108 | <i>Sphingomonas phyllosphaerae</i>               | P(α) |        | WP_022687793.1 | 153 | Short-BLUF     | 233 |
| 109 | <i>Sphingomonas</i> sp. Mn802worker              | P(α) |        | WP_019517102.1 | 138 | Short-BLUF     | 234 |
|     | <i>Sphingomonas</i> sp. PAMC 26605               | P(α) |        | WP_010188000.1 | 131 | Short-BLUF     | 235 |
|     |                                                  |      |        | WP_010187435.1 | 215 | Short-BLUF     | 236 |
|     |                                                  |      |        | WP_010187036.1 | 135 | Short-BLUF     | 237 |
|     |                                                  |      |        | WP_010186219.1 | 148 | Short-BLUF     | 238 |
|     | <i>Sphingomonas</i> sp. PAMC 26617               | P(α) |        | WP_010163859.1 | 146 | Short-BLUF     | 239 |
|     |                                                  |      |        | WP_010164991.1 | 147 | Short-BLUF     | 240 |
|     | <i>Sphingomonas</i> sp. PAMC 26621               | P(α) |        | WP_010219263.1 | 240 | Short-BLUF     | 241 |
|     |                                                  |      |        | WP_010219976.1 | 148 | Short-BLUF     | 242 |
|     |                                                  |      |        | WP_010217326.1 | 141 | Short-BLUF     | 243 |
|     |                                                  |      |        | WP_010219296.1 | 134 | Short-BLUF     | 244 |
|     |                                                  |      |        | WP_010217042.1 | 165 | Short-BLUF     | 245 |
|     |                                                  |      |        | WP_010219603.1 | 133 | Short-BLUF     | 246 |
|     |                                                  |      |        | WP_010219403.1 | 147 | Short-BLUF     | 247 |
|     |                                                  |      |        | WP_010219691.1 | 140 | Short-BLUF     | 248 |
|     |                                                  |      |        | WP_010220036.1 | 81  | Short-BLUF     | 249 |
|     | <i>Sphingomonas</i> sp. S17                      | P(α) | F3X316 | WP_007406954.1 | 130 | Short-BLUF     | 250 |
|     | <i>Sphingomonas</i> sp. SKA58                    | P(α) | Q1NAZ4 | WP_009821301.1 | 133 | Short-BLUF     | 251 |
| 110 | <i>Sphingomonas wittichii</i>                    | P(α) |        | WP_016746531.1 | 150 | Short-BLUF     | 252 |
|     | <i>Sphingomonas wittichii</i> RW1                | P(α) | A5VFD3 | YP_001265137.1 | 164 | Short-BLUF     | 253 |
| 111 | <i>Sphingomonas-like bacterium</i> B12           | P(α) |        | WP_022691481.1 | 137 | Short-BLUF     | 254 |
| 112 | <i>Sphingopyxis alaskensis</i>                   | P(α) | Q1GWG4 | YP_615341.1    | 141 | Short-BLUF     | 255 |
| 113 | <i>Sphingopyxis baekryungensis</i>               | P(α) |        | WP_022672508.1 | 704 | GGDEF+EAL+BLUF | 256 |
|     |                                                  |      |        | WP_022673489.1 | 136 | Short-BLUF     | 257 |
| 114 | <i>Sphingopyxis</i> sp. MC1                      | P(α) | N9WHS2 | WP_003038631.1 | 138 | Short-BLUF     | 258 |
| 115 | <i>Sulfitobacter guttiiformis</i>                | P(α) | J7G2U7 | YP_006965188.1 | 144 | Short-BLUF     | 259 |
| 116 | <i>Sulfitobacter</i> sp. EE-36                   | P(α) | A3S970 | WP_005850501.1 | 110 | Short-BLUF     | 260 |
|     | <i>Sulfitobacter</i> sp. NAS-14.1                | P(α) | A3SU32 | WP_009825579.1 | 110 | Short-BLUF     | 261 |

|     |                                                       |                 |        |                |     |            |     |
|-----|-------------------------------------------------------|-----------------|--------|----------------|-----|------------|-----|
| 117 | <i>Variovorax paradoxus</i> B4                        | P( $\alpha$ )   | T1X5J0 | YP_008514845.1 | 134 | Short-BLUF | 262 |
| 118 | <i>Achromobacter xylosoxidans</i>                     | P( $\beta$ )    | F7SWX0 | WP_006391283.1 | 408 | BLUF+EAL   | 263 |
|     | <i>Achromobacter xylosoxidans</i> NH44784-1996        | P( $\beta$ )    | R4XQI4 | YP_008030152.1 | 408 | BLUF+EAL   | 264 |
| 119 | <i>Acidovorax avenae</i>                              | P( $\beta$ )    |        | WP_019702121.1 | 140 | Short-BLUF | 265 |
|     | <i>Acidovorax avenae</i> ATCC 19860                   | P( $\beta$ )    | F0QCG3 | YP_004236013.1 | 140 | Short-BLUF | 266 |
|     |                                                       |                 | F0Q3D8 | YP_004236407.1 | 137 | Short-BLUF | 267 |
| 120 | <i>Acidovorax avenae</i> sub. <i>citrulli</i> AAC00-1 | P( $\beta$ )    | A1TT92 | YP_971954.1    | 140 | Short-BLUF | 268 |
|     |                                                       |                 | A1TUE4 | YP_972356.1    | 137 | Short-BLUF | 269 |
| 121 | <i>Acidovorax delafieldii</i> 2AN                     | P( $\beta$ )    | C5TAV7 | WP_005799771.1 | 140 | Short-BLUF | 270 |
|     |                                                       |                 | C5TBB6 | WP_005799950.1 | 132 | Short-BLUF | 271 |
| 122 | <i>Acidovorax ebreus</i> TPSY                         | P( $\beta$ )    | B9ME34 | YP_002552288.1 | 140 | Short-BLUF | 272 |
| 123 | <i>Acidovorax radicis</i>                             | P( $\beta$ )    |        | WP_010466631.1 | 132 | Short-BLUF | 273 |
|     |                                                       |                 |        | WP_010461918.1 | 140 | Short-BLUF | 274 |
|     |                                                       |                 |        | WP_010465348.1 | 139 | Short-BLUF | 275 |
| 124 | <i>Acidovorax</i> sp. CF316                           | P( $\beta$ )    | J0KJ25 | WP_007856976.1 | 132 | Short-BLUF | 276 |
|     |                                                       |                 | J1EI97 | WP_007855842.1 | 140 | Short-BLUF | 277 |
|     |                                                       |                 | J0U4I2 | WP_007857182.1 | 139 | Short-BLUF | 278 |
|     | <i>Acidovorax</i> sp. JS42                            | P( $\beta$ )    | A1W4E7 | YP_985198.1    | 140 | Short-BLUF | 279 |
|     | <i>Acidovorax</i> sp. KKS102                          | P( $\beta$ )    | K0IEC4 | YP_006856384.1 | 132 | Short-BLUF | 280 |
|     |                                                       |                 |        | YP_006853313.1 | 140 | Short-BLUF | 281 |
|     |                                                       |                 | K0I309 | YP_006854227.1 | 139 | Short-BLUF | 282 |
|     | <i>Acidovorax</i> sp. MR-S7                           | P( $\beta$ )    |        | WP_020229597.1 | 140 | Short-BLUF | 283 |
|     | <i>Acidovorax</i> sp. NO-1                            | P( $\beta$ )    | H0C3A0 | WP_008906782.1 | 139 | Short-BLUF | 284 |
|     |                                                       |                 | H0BYE8 | WP_008905106.1 | 140 | Short-BLUF | 285 |
|     |                                                       |                 | H0C4J7 | WP_008907226.1 | 132 | Short-BLUF | 286 |
| 125 | <i>Alicyciphilus denitrificans</i> DSM 14773          | P( $\beta$ )    | F4G8R2 | YP_004386855.1 | 140 | Short-BLUF | 287 |
|     | <i>Alicyciphilus denitrificans</i> JCM 14587          | P( $\beta$ )    | E8U0X9 | YP_004125618.1 | 140 | Short-BLUF | 288 |
| 126 | <i>beta proteobacterium</i> KB13                      | P( $\beta$ )U   | B6BTG8 | WP_009852483.1 | 135 | Short-BLUF | 289 |
| 127 | <i>beta proteobacterium</i> L13                       | P( $\beta$ )    |        | WP_017509222.1 | 142 | Short-BLUF | 290 |
| 128 | <i>Betaproteobacteria bacterium</i> MOLA814           | P( $\beta$ )Unc |        | WP_023472146.1 | 141 | Short-BLUF | 291 |
| 129 | <i>Bordetella avium</i> (strain 197N)                 | P( $\beta$ )    | Q2L1Z3 | YP_786068.1    | 421 | BLUF+EAL   | 292 |
| 130 | <i>Brachymonas chironomi</i>                          | P( $\beta$ )    |        | WP_018715076.1 | 140 | Short-BLUF | 293 |
| 131 | <i>Burkholderia bryophila</i>                         | P( $\beta$ )    |        | WP_020069946.1 | 171 | Short-BLUF | 294 |
| 132 | <i>Burkholderia</i> sp. CCGE1003                      | P( $\beta$ )    | E1TCW7 | YP_003907473.1 | 174 | Short-BLUF | 295 |
| 133 | <i>Burkholderiales bacterium</i> JOSHI_001            | P( $\beta$ )    | H5WUY1 | WP_009548903.1 | 143 | Short-BLUF | 296 |
|     |                                                       |                 | H5WRM6 | WP_009552427.1 | 157 | Short-BLUF | 297 |
|     |                                                       |                 | H5WLF9 | WP_009549831.1 | 142 | Short-BLUF | 298 |
|     |                                                       |                 | H5WT39 | WP_009553481.1 | 137 | Short-BLUF | 299 |
| 134 | <i>Caldimonas manganoxidans</i>                       | P( $\beta$ )    |        | WP_019560888.1 | 143 | Short-BLUF | 300 |
| 135 | <i>Chromobacterium violaceum</i>                      | P( $\beta$ )    | Q7NSR1 | NP_903029.1    | 141 | Short-BLUF | 301 |
| 136 | <i>Comamonadaceae bacterium</i> CR                    | P( $\beta$ )    |        | YP_008681716.1 | 140 | Short-BLUF | 302 |
|     |                                                       |                 |        | YP_008682224.1 | 144 | Short-BLUF | 303 |
| 137 | <i>Comamonas testosteroni</i> (strain CNB-2)          | P( $\beta$ )    | D0J3Z8 | YP_003277487.1 | 135 | Short-BLUF | 304 |
|     |                                                       |                 | D0J4M9 | YP_003277583.1 | 131 | Short-BLUF | 305 |
|     | <i>Comamonas testosteroni</i> ATCC 11996              | P( $\beta$ )    | H1RQ19 | WP_003076132.1 | 132 | Short-BLUF | 306 |
|     | <i>Comamonas testosteroni</i> S44                     | P( $\beta$ )    | D8DEA6 | WP_003071555.1 | 132 | Short-BLUF | 307 |
| 138 | <i>Cupriavidus basilensis</i> OR16                    | P( $\beta$ )    | H1S5P4 | WP_006158738.1 | 147 | Short-BLUF | 308 |
| 139 | <i>Cupriavidus necator</i> ATCC 17699                 | P( $\beta$ )    | Q0JZS4 | YP_841480.1    | 147 | Short-BLUF | 309 |
|     | <i>Cupriavidus necator</i> ATCC 43291                 | P( $\beta$ )    | F8GRM4 | YP_004682121.1 | 147 | Short-BLUF | 310 |
| 140 | <i>Cupriavidus</i> sp. BIS7                           | P( $\beta$ )    |        | WP_019447941.1 | 147 | Short-BLUF | 311 |
|     | <i>Cupriavidus</i> sp. HMR-1                          | P( $\beta$ )    | L2ELR6 | WP_008643847.1 | 147 | Short-BLUF | 312 |
|     | <i>Cupriavidus</i> sp. HPC(L)                         | P( $\beta$ )    | K6B9H2 | WP_006577586.1 | 147 | Short-BLUF | 313 |
|     | <i>Cupriavidus</i> sp. UYPR2.512                      | P( $\beta$ )    |        | WP_018308878.1 | 147 | Short-BLUF | 314 |



|     |                                                              |      |        |                |     |            |     |
|-----|--------------------------------------------------------------|------|--------|----------------|-----|------------|-----|
|     | <i>Cupriavidus sp. WS</i>                                    | P(β) |        | WP_020204073.1 | 147 | Short-BLUF | 315 |
| 141 | <i>Cupriavidus taiwanensis</i>                               | P(β) |        | WP_018008408.1 | 147 | Short-BLUF | 316 |
|     | <i>Cupriavidus taiwanensis</i> LMG 19424                     | P(β) | B3RBI8 | YP_002008317.1 | 147 | Short-BLUF | 317 |
| 142 | <i>Curvibacter lanceolatus</i>                               | P(β) |        | WP_019576065.1 | 140 | Short-BLUF | 318 |
|     | <i>Curvibacter lanceolatus</i>                               | P(β) |        | WP_019577548.1 | 140 | Short-BLUF | 319 |
| 143 | <i>Curvibacter putative symbiont of Hydra magnipapillata</i> | P(β) | C9Y8H7 | CBA27840.1     | 156 | Short-BLUF | 320 |
|     |                                                              |      | C9Y9E1 | CBA28480.1     | 425 | BLUF+EAL   | 321 |
|     |                                                              |      | C9YG67 | CBA33160.1     | 77  | Short-BLUF | 322 |
| 144 | <i>Delftia acidovorans</i> SPH-1                             | P(β) | A9BX41 | YP_001565411.1 | 133 | Short-BLUF | 323 |
| 145 | <i>Delftia sp. (strain Cs1-4)</i>                            | P(β) | F6ALE0 | YP_004488022.1 | 133 | Short-BLUF | 324 |
| 146 | <i>Duganella zoogloeoides</i>                                | P(β) |        | WP_019920955.1 | 141 | Short-BLUF | 325 |
| 147 | <i>Herbaspirillum frisingense</i> GSF30                      | P(β) | R0FSP4 | WP_006463383.1 | 141 | Short-BLUF | 326 |
| 148 | <i>Herbaspirillum lusitanum</i>                              | P(β) |        | WP_016833369.1 | 141 | Short-BLUF | 327 |
| 149 | <i>Herbaspirillum seropedicae</i>                            | P(β) |        | WP_017452789.1 | 141 | Short-BLUF | 328 |
|     | <i>Herbaspirillum seropedicae</i> (strain SmR1)              | P(β) | D8IY84 | YP_003778114.1 | 141 | Short-BLUF | 329 |
| 150 | <i>Herbaspirillum sp. CF444</i>                              | P(β) | J3D4X2 | WP_007882396.1 | 141 | Short-BLUF | 330 |
|     | <i>Herbaspirillum sp. GW103</i>                              | P(β) | I3CM34 | WP_008333777.1 | 141 | Short-BLUF | 331 |
|     | <i>Herbaspirillum sp. YR522</i>                              | P(β) | J3CNJ7 | WP_008112004.1 | 141 | Short-BLUF | 332 |
| 151 | <i>Herminiimonas arsenicoxydans</i>                          | P(β) | A4G7R3 | CAL62550.2     | 116 | Short-BLUF | 333 |
| 152 | <i>Hydrogenophaga sp. PBC</i>                                | P(β) |        | WP_009520410.1 | 140 | Short-BLUF | 334 |
| 153 | <i>Janthinobacterium lividum</i>                             | P(β) |        | WP_010396398.1 | 135 | Short-BLUF | 335 |
|     |                                                              |      |        | WP_010399694.1 | 141 | Short-BLUF | 336 |
| 154 | <i>Janthinobacterium sp. CG3</i>                             | P(β) |        | WP_017879051.1 | 136 | Short-BLUF | 337 |
| 155 | <i>Leptothrix cholodnii</i> SP-6                             | P(β) | B1XZW9 | YP_001790861.1 | 141 | Short-BLUF | 338 |
| 156 | <i>Limnobacter sp. MED105</i>                                | P(β) | A6GT96 | WP_008252022.1 | 157 | Short-BLUF | 339 |
|     |                                                              |      | A6GT66 | WP_008251962.1 | 134 | Short-BLUF | 340 |
| 157 | <i>Limnohabitans sp. Rim28</i>                               | P(β) |        | WP_019425978.1 | 147 | Short-BLUF | 341 |
|     |                                                              |      |        | WP_019426427.1 | 140 | Short-BLUF | 342 |
|     | <i>Limnohabitans sp. Rim47</i>                               | P(β) |        | WP_019429110.1 | 147 | Short-BLUF | 343 |
|     |                                                              |      |        | WP_019430089.1 | 140 | Short-BLUF | 344 |
| 158 | <i>Methylibium petroleiphilum</i> (strain PM1)               | P(β) | A2SEP7 | YP_001020271.1 | 142 | Short-BLUF | 345 |
|     |                                                              |      | A2SHW7 | YP_001021391.1 | 97  | Short-BLUF | 346 |
| 159 | <i>Methylothermobacter mobilis</i>                           | P(β) |        | WP_019897538.1 | 138 | Short-BLUF | 347 |
|     |                                                              |      |        | WP_019896887.1 | 159 | Short-BLUF | 348 |
|     | <i>Methylothermobacter mobilis</i> JLW8                      | P(β) | C6WT83 | YP_003049672.1 | 162 | Short-BLUF | 349 |
| 160 | <i>Methylothermobacter sp. 301</i>                           | P(β) | D7DKL3 | YP_003675036.1 | 137 | Short-BLUF | 350 |
|     |                                                              |      | D7DLZ8 | YP_003675269.1 | 199 | Short-BLUF | 351 |
| 161 | <i>Methylothermobacter sp. NVD</i>                           | P(β) |        | WP_018410763.1 | 140 | Short-BLUF | 352 |
| 162 | <i>Methylothermobacter universalis</i>                       | P(β) |        | WP_018230298.1 | 140 | Short-BLUF | 353 |
|     |                                                              |      |        | WP_020164190.1 | 147 | Short-BLUF | 354 |
|     |                                                              |      |        | WP_018229736.1 | 141 | Short-BLUF | 355 |
|     | <i>Methylothermobacter universalis</i> FAM5                  | P(β) | F5RDI2 | WP_008061871.1 | 140 | Short-BLUF | 356 |
|     |                                                              |      | F5RC20 | WP_008060661.1 | 141 | Short-BLUF | 357 |
| 163 | <i>Oxalobacteraceae bacterium</i> IMCC9480                   | P(β) | F1VUP6 | WP_009664611.1 | 141 | Short-BLUF | 358 |
|     | <i>Oxalobacteraceae bacterium</i> JGI 0001004-K23            | P(β) |        | WP_018058743.1 | 141 | Short-BLUF | 359 |
| 164 | <i>Polaromonas naphthalenivorans</i> CJ2                     | P(β) | A1VKQ2 | YP_981151.1    | 140 | Short-BLUF | 360 |
|     |                                                              |      | A1VJM4 | YP_980773.1    | 134 | Short-BLUF | 361 |
| 165 | <i>Polaromonas sp. CF318</i>                                 | P(β) | J2LWR4 | WP_007863266.1 | 135 | Short-BLUF | 362 |
|     |                                                              |      | J2U008 | WP_007867959.1 | 140 | Short-BLUF | 363 |
|     |                                                              |      | J2UJU6 | WP_007862374.1 | 135 | Short-BLUF | 364 |
|     | <i>Polaromonas sp. strain JS666</i>                          | P(β) | Q12F66 | YP_547724.1    | 140 | Short-BLUF | 365 |
|     |                                                              |      | Q12FR6 | YP_547524.1    | 135 | Short-BLUF | 366 |
| 166 | <i>Polynucleobacter necessarius</i> STIR1                    | P(β) | B1XTH8 | YP_001797269.1 | 135 | Short-BLUF | 367 |

|     |                                                            |      |        |                           |     |                    |     |
|-----|------------------------------------------------------------|------|--------|---------------------------|-----|--------------------|-----|
| 167 | <i>Polynucleobacter</i> sp. QLW-P1DMWA-1                   | P(β) | A4SVS3 | YP_001155151.1            | 135 | Short-BLUF         | 368 |
| 168 | <i>Pseudogulbenkiania ferrooxidans</i> EGD-HP2             | P(β) | U1AEJ0 | WP_021475086.1            | 141 | Short-BLUF         | 369 |
| 169 | <i>Ralstonia eutropha</i> H16                              | P(β) | Q0JZS4 | CAJ96750.1/YP_841480.1    | 147 | Short-BLUF         | 370 |
|     | <i>Ralstonia eutropha</i> JMP134                           | P(β) | Q46V06 | YP_297872.1               | 147 | Short-BLUF         | 371 |
| 170 | <i>Ralstonia metallidurans</i> CH34                        | P(β) | Q1LG69 | YP_586126.1               | 147 | Short-BLUF         | 372 |
| 171 | <i>Ralstonia pickettii</i> DTP0602                         | P(β) |        | YP_008600000.1            | 147 | Short-BLUF         | 373 |
| 172 | <i>Ralstonia</i> sp. GA3-3                                 | P(β) | R7XF66 | EON18032.1/YP_841480.1    | 147 | Short-BLUF         | 374 |
| 173 | <i>Ramlibacter tataouinensis</i> DSM 14655                 | P(β) | F5XYH6 | YP_004619171.1            | 225 | Short-BLUF         | 375 |
|     |                                                            |      | F5XWS2 | YP_004620235.1            | 140 | Short-BLUF         | 376 |
| 174 | <i>Rhodocyclaceae</i> bacterium RZ94                       | P(β) |        | WP_019918775.1            | 144 | Short-BLUF         | 377 |
| 175 | <i>Rhodoferax ferrireducens</i> DSM 15236                  | P(β) | Q21YW7 | YP_522567.1               | 140 | Short-BLUF         | 378 |
| 176 | <i>Rubrivivax benzoatilyticus</i> JA2                      | P(β) | F3LLG6 | WP_009855751.1            | 141 | Short-BLUF         | 379 |
|     |                                                            |      | F3LQM5 | WP_009857208.1            | 187 | Short-BLUF         | 380 |
| 177 | <i>Rubrivivax gelatinosus</i> (strain NBRC 100245 / IL144) | P(β) | I0HNG0 | YP_005436046.1            | 151 | Short-BLUF         | 381 |
|     |                                                            |      | I0HXR5 | YP_005439301.1            | 141 | Short-BLUF         | 382 |
| 178 | <i>Thauera</i> sp. 27                                      | P(β) | N6YS95 | WP_002936113.1            | 779 | PAS+GGDEF+EAL+BLUF | 383 |
| 179 | <i>Thiomonas intermedia</i> K12                            | P(β) | D5X5X2 | YP_003642355.1            | 159 | Short-BLUF         | 384 |
| 180 | <i>Variovorax paradoxus</i>                                | P(β) |        | WP_019654574.1            | 135 | Short-BLUF         | 385 |
|     |                                                            |      |        | WP_019656584.1            | 140 | Short-BLUF         | 386 |
|     | <i>Variovorax paradoxus</i> (strain EPS)                   | P(β) | E6UYP4 | YP_004157058.1            | 140 | Short-BLUF         | 387 |
|     |                                                            |      | E6UZL0 | YP_004155929.1            | 140 | Short-BLUF         | 388 |
|     |                                                            |      | E6UVP8 | YP_004153392.1            | 134 | Short-BLUF         | 389 |
|     | <i>Variovorax paradoxus</i> B4                             | P(β) | T1XG74 | YP_008518022.1            | 140 | Short-BLUF         | 390 |
|     | <i>Variovorax paradoxus</i> S110                           | P(β) | C5CWX4 | YP_002945997.1            | 140 | Short-BLUF         | 391 |
|     |                                                            |      | C5CNN1 | YP_002942913.1            | 134 | Short-BLUF         | 392 |
|     | <i>Variovorax</i> sp. CF313                                | P(β) | J2TF58 | WP_007831506.1            | 138 | Short-BLUF         | 393 |
|     |                                                            |      |        | WP_007837143.1            | 140 | Short-BLUF         | 394 |
| 181 | <i>Verminephrobacter aporrectodeae</i>                     | P(β) |        | WP_010101101.1            | 140 | Short-BLUF         | 395 |
| 182 | <i>Verminephrobacter eiseniae</i> strain EF01-2            | P(β) | A1WMH3 | YP_997848.1               | 133 | Short-BLUF         | 396 |
|     |                                                            |      | A1WHJ0 | YP_996115.1               | 142 | Short-BLUF         | 397 |
| 183 | <i>Acinetobacter</i>                                       | P(γ) |        | WP_017398952.1            | 147 | Short-BLUF         | 398 |
| 184 | <i>Acinetobacter baumannii</i>                             | P(γ) | B9UN50 | ACJ61333.1                | 125 | Short-BLUF         | 399 |
|     |                                                            |      |        | WP_000383195.1            | 156 | Short-BLUF         | 400 |
|     |                                                            |      |        | WP_001102891.1            | 156 | Short-BLUF         | 401 |
|     |                                                            |      |        | WP_019205050.1            | 110 | Short-BLUF         | 402 |
|     | <i>Acinetobacter baumannii</i> ATCC 17978                  | P(γ) | A3M6V8 | ABO12652.2/YP_001847089.1 | 156 | Short-BLUF         | 403 |
|     | <i>Acinetobacter baumannii</i> 6013113                     | P(γ) | F5IG55 | EGJ62365.1/YP_001713224.1 | 156 | Short-BLUF         | 404 |
|     | <i>Acinetobacter baumannii</i> 6013150                     | P(γ) | F5I0V4 | EGJ59752.1/YP_001713224.1 | 156 | Short-BLUF         | 405 |
|     | <i>Acinetobacter baumannii</i> 6014059                     | P(γ) | F5INK0 | EGJ67557.1/YP_001847089.1 | 156 | Short-BLUF         | 406 |
|     | <i>Acinetobacter baumannii</i> AA-014                      | P(γ) | L9MMX8 | ELW87667.1/YP_001847089.1 | 156 | Short-BLUF         | 407 |
|     | <i>Acinetobacter baumannii</i> AB0057                      | P(γ) | B7IC80 | YP_002319929.1            | 146 | Short-BLUF         | 408 |
|     | <i>Acinetobacter baumannii</i> Ab11111                     | P(γ) | K1KNL6 | EKB33264.1/YP_001847089.1 | 156 | Short-BLUF         | 409 |
|     | <i>Acinetobacter baumannii</i> AB210                       | P(γ) | F5JQ04 | EGK47564.1/YP_001847089.1 | 156 | Short-BLUF         | 410 |
|     | <i>Acinetobacter baumannii</i> AB307-0294                  | P(γ) | B7H0C4 | YP_002325120.1            | 156 | Short-BLUF         | 411 |
|     | <i>Acinetobacter baumannii</i> Ab33333                     | P(γ) | K1L153 | EKB37999.1/YP_001847089.1 | 156 | Short-BLUF         | 412 |
|     | <i>Acinetobacter baumannii</i> Ab44444                     | P(γ) | K1LDN5 | EKB42599.1/YP_001847089.1 | 156 | Short-BLUF         | 413 |
|     | <i>Acinetobacter baumannii</i> ABNIH1                      | P(γ) | F9I778 | EGT96279.1/YP_001847089.1 | 156 | Short-BLUF         | 414 |
|     | <i>Acinetobacter baumannii</i> ABNIH10                     | P(γ) | M8FRG3 | EMU01204.1/YP_001713224.1 | 156 | Short-BLUF         | 415 |
|     | <i>Acinetobacter baumannii</i> ABNIH11                     | P(γ) | M8FCJ0 | EMU03061.1/YP_001713224.1 | 156 | Short-BLUF         | 416 |
|     | <i>Acinetobacter baumannii</i> ABNIH13                     | P(γ) | M8G623 | EMU12871.1/YP_001847089.1 | 156 | Short-BLUF         | 417 |
|     | <i>Acinetobacter baumannii</i> ABNIH14                     | P(γ) | M8G600 | EMU15902.1/YP_001847089.1 | 156 | Short-BLUF         | 418 |
|     | <i>Acinetobacter baumannii</i> ABNIH15                     | P(γ) | M8GPL3 | EMU19730.1/YP_001847089.1 | 156 | Short-BLUF         | 419 |
|     | <i>Acinetobacter baumannii</i> ABNIH16                     | P(γ) | M8HH59 | EMU18738.1/YP_001847089.1 | 156 | Short-BLUF         | 420 |



|                                     |      |        |                               |     |            |     |
|-------------------------------------|------|--------|-------------------------------|-----|------------|-----|
| Acinetobacter baumannii ABNIH17     | P(y) | M8I2R0 | EMU36405.1/YP_001847089.1     | 156 | Short-BLUF | 421 |
| Acinetobacter baumannii ABNIH18     | P(y) | M8HM77 | EMU34022.1/YP_001847089.1     | 156 | Short-BLUF | 422 |
| Acinetobacter baumannii ABNIH19     | P(y) | M8IIQ3 | EMU31648.1/YP_001713224.1     | 156 | Short-BLUF | 423 |
| Acinetobacter baumannii ABNIH2      | P(y) | F9IL05 | EGT94630.1/YP_001847089.1     | 156 | Short-BLUF | 424 |
| Acinetobacter baumannii ABNIH20     | P(y) | M8HYS5 | EMU38102.1/YP_001847089.1     | 156 | Short-BLUF | 425 |
| Acinetobacter baumannii ABNIH22     | P(y) | M8IRW2 | EMU37704.1/YP_001847089.1     | 156 | Short-BLUF | 426 |
| Acinetobacter baumannii ABNIH23     | P(y) | M8INV0 | EMU43935.1/YP_001847089.1     | 156 | Short-BLUF | 427 |
| Acinetobacter baumannii ABNIH24     | P(y) | M8JP20 | EMU48679.1/YP_001847089.1     | 156 | Short-BLUF | 428 |
| Acinetobacter baumannii ABNIH25     | P(y) | M8E8P5 | EMT89469.1/YP_001847089.1     | 156 | Short-BLUF | 429 |
| Acinetobacter baumannii ABNIH26     | P(y) | M8ENA7 | EMT84227.1/YP_001847089.1     | 156 | Short-BLUF | 430 |
| Acinetobacter baumannii ABNIH3      | P(y) | F9J0C3 | EGT93760.1/YP_001847089.1     | 156 | Short-BLUF | 431 |
| Acinetobacter baumannii ABNIH4      | P(y) | F9J5J3 | EGU03419.1/YP_001847089.1     | 156 | Short-BLUF | 432 |
| Acinetobacter baumannii ABNIH5      | P(y) | M8E7N4 | EMT89085.1/YP_001847089.1     | 156 | Short-BLUF | 433 |
| Acinetobacter baumannii ABNIH6      | P(y) | M8FRA0 | EMT97557.1/YP_001713224.1     | 156 | Short-BLUF | 434 |
| Acinetobacter baumannii ABNIH7      | P(y) | M8EIC5 | EMT95636.1/YP_001713224.1     | 156 | Short-BLUF | 435 |
| Acinetobacter baumannii AC12        | P(y) | J2Z674 | EJN44155.1/YP_001847089.1     | 156 | Short-BLUF | 436 |
| Acinetobacter baumannii AC30        | P(y) | K6HQG6 | EKO44813.1/YP_001847089.1     | 156 | Short-BLUF | 437 |
| Acinetobacter baumannii ACICU       | P(y) | B2HUF8 | YP_001847089.1                | 156 | Short-BLUF | 438 |
| Acinetobacter baumannii ANC 4097    | P(y) | N9KTG4 | ENW69199.1/YP_001713224.1     | 156 | Short-BLUF | 439 |
| Acinetobacter baumannii ATCC 19606  | P(y) | D0C5R9 | EEX04334.1/YP_007596771.1     | 156 | Short-BLUF | 440 |
| Acinetobacter baumannii AYE         | P(y) | B0V7Y7 | YP_001713224.1                | 156 | Short-BLUF | 441 |
| Acinetobacter baumannii BJAB0715    | P(y) | S5CPN1 | YP_008217774.1                | 156 | Short-BLUF | 442 |
| Acinetobacter baumannii Canada BC-5 | P(y) | J4JC81 | EJO38969.1/YP_001713224.1     | 156 | Short-BLUF | 443 |
| Acinetobacter baumannii Canada BC1  | P(y) | K6MXH5 | EKP56108.1/YP_001713224.1     | 156 | Short-BLUF | 444 |
| Acinetobacter baumannii D1279779    | P(y) | M4QZE8 | AGH36110.1/YP_007596771.1     | 156 | Short-BLUF | 445 |
| Acinetobacter baumannii IS-116      | P(y) | K1F8S0 | EKA67743.1/YP_001847089.1     | 156 | Short-BLUF | 446 |
| Acinetobacter baumannii IS-123      | P(y) | J4ZJ36 | EJO37798.1/WP_001102890.1     | 156 | Short-BLUF | 447 |
| Acinetobacter baumannii IS-143      | P(y) | K1F3U0 | EKA73961.1/YP_001847089.1     | 156 | Short-BLUF | 448 |
| Acinetobacter baumannii IS-235      | P(y) | K5EGT2 | EKK05136.1/YP_001713224.1     | 156 | Short-BLUF | 449 |
| Acinetobacter baumannii IS-251      | P(y) | K5EN29 | EKK16599.1/YP_001713224.1     | 156 | Short-BLUF | 450 |
| Acinetobacter baumannii IS-58       | P(y) | K1F7X7 | EKA77090.1/YP_001713224.1     | 156 | Short-BLUF | 451 |
| Acinetobacter baumannii MDR-TJ      | P(y) | I1XZ18 | AFI94904.1/YP_001847089.1     | 156 | Short-BLUF | 452 |
| Acinetobacter baumannii MDR-ZJ06    | P(y) | G2JJV4 | YP_005526514.1/YP_001847089.1 | 156 | Short-BLUF | 453 |
| Acinetobacter baumannii MSP4-16     | P(y) | M2Z5Q5 | EME56213.1/YP_007596771.1     | 156 | Short-BLUF | 454 |
| Acinetobacter baumannii Naval-113   | P(y) | K9C0B8 | EKU64146.1/YP_001847089.1     | 156 | Short-BLUF | 455 |
| Acinetobacter baumannii Naval-13    | P(y) | K5PLW1 | EKL51476.1/WP_001102890.1     | 156 | Short-BLUF | 456 |
| Acinetobacter baumannii Naval-17    | P(y) | J1MTN3 | EJG29655.1/YP_001847089.1     | 156 | Short-BLUF | 457 |
| Acinetobacter baumannii Naval-18    | P(y) | J4UB75 | EJP50580.1/WP_001102890.1     | 156 | Short-BLUF | 458 |
| Acinetobacter baumannii Naval-2     | P(y) | K6M6A9 | EKP46927.1/YP_001847089.1     | 156 | Short-BLUF | 459 |
| Acinetobacter baumannii Naval-21    | P(y) | K6N8V9 | EKP54045.1/YP_001713224.1     | 156 | Short-BLUF | 460 |
| Acinetobacter baumannii Naval-57    | P(y) | L9P2K2 | ELX05830.1/YP_007596771.1     | 156 | Short-BLUF | 461 |
| Acinetobacter baumannii Naval-72    | P(y) | K5EE33 | EKK13424.1/YP_001847089.1     | 156 | Short-BLUF | 462 |
| Acinetobacter baumannii Naval-78    | P(y) | L9NMD3 | ELX00539.1/YP_001847089.1     | 156 | Short-BLUF | 463 |
| Acinetobacter baumannii Naval-81    | P(y) | K4YNM4 | EJP60409.1/WP_001102890.1     | 156 | Short-BLUF | 464 |
| Acinetobacter baumannii Naval-82    | P(y) | K6NY26 | EKP62400.1/YP_007596771.1     | 156 | Short-BLUF | 465 |
| Acinetobacter baumannii Naval-83    | P(y) | K5Q641 | EKL58786.1/YP_001713224.1     | 156 | Short-BLUF | 466 |
| Acinetobacter baumannii NIPH 1362   | P(y) | N8TB24 | ENU55812.1/YP_001847089.1     | 156 | Short-BLUF | 467 |
| Acinetobacter baumannii NIPH 146    | P(y) | N8TY29 | ENU64868.1/WP_001102890.1     | 156 | Short-BLUF | 468 |
| Acinetobacter baumannii NIPH 1669   | P(y) | N8SXZ9 | ENU51242.1/WP_001102890.1     | 156 | Short-BLUF | 469 |
| Acinetobacter baumannii NIPH 1734   | P(y) | N8V464 | ENU77902/WP_001102890.1       | 156 | Short-BLUF | 470 |
| Acinetobacter baumannii NIPH 190    | P(y) | N8YY11 | ENV26434.1/YP_007596771.1     | 156 | Short-BLUF | 471 |
| Acinetobacter baumannii NIPH 201    | P(y) | N9GPE0 | ENW36793.1/YP_001847089.1     | 156 | Short-BLUF | 472 |
| Acinetobacter baumannii NIPH 2061   | P(y) | N8UQL2 | ENU72709.1/YP_001847089.1     | 156 | Short-BLUF | 473 |

|                                       |      |        |                               |     |            |     |
|---------------------------------------|------|--------|-------------------------------|-----|------------|-----|
| Acinetobacter baumannii NIPH 24       | P(γ) | N8NHZ5 | ENU14041.1/YP_001847089.1     | 156 | Short-BLUF | 474 |
| Acinetobacter baumannii NIPH 290      | P(γ) | N9KFC5 | ENW64524.1/YP_001713224.1     | 156 | Short-BLUF | 475 |
| Acinetobacter baumannii NIPH 329      | P(γ) | N9IN83 | ENW45510.1/WP_002132039.1     | 156 | Short-BLUF | 476 |
| Acinetobacter baumannii NIPH 329      | P(γ) | N9II22 | ENW43700.1/WP_004708845.1     | 147 | Short-BLUF | 477 |
| Acinetobacter baumannii NIPH 335      | P(γ) | N9IRT6 | ENW44164.1/YP_001847089.1     | 156 | Short-BLUF | 478 |
| Acinetobacter baumannii NIPH 410      | P(γ) | S3TXG4 | WP_016653868.1                | 156 | Short-BLUF | 479 |
| Acinetobacter baumannii NIPH 527      | P(γ) | N9GQH5 | ENW37177.1/YP_001713224.1     | 156 | Short-BLUF | 480 |
| Acinetobacter baumannii NIPH 528      | P(γ) | N9JTB2 | ENW57311.1/YP_001847089.1     | 156 | Short-BLUF | 481 |
| Acinetobacter baumannii NIPH 60       | P(γ) | N8ZBA3 | ENV30959/WP_001102890.1       | 156 | Short-BLUF | 482 |
| Acinetobacter baumannii NIPH 601      | P(γ) | N9HY38 | ENW52033.1/YP_007596771.1     | 156 | Short-BLUF | 483 |
| Acinetobacter baumannii NIPH 615      | P(γ) | N8U9R8 | ENU68973.1/WP_001102890.1     | 156 | Short-BLUF | 484 |
| Acinetobacter baumannii NIPH 67       | P(γ) | N9J4Z4 | WP_005131310.1                | 156 | Short-BLUF | 485 |
| Acinetobacter baumannii NIPH 70       | P(γ) | N9KCX5 | ENW63679.1/YP_001847089.1     | 156 | Short-BLUF | 486 |
| Acinetobacter baumannii NIPH 80       | P(γ) | N9L2Z3 | WP_005138547.1                | 156 | Short-BLUF | 487 |
| Acinetobacter baumannii OIFC0162      | P(γ) | K5ET94 | EKK09161.1/WP_001102887.1     | 156 | Short-BLUF | 488 |
| Acinetobacter baumannii OIFC021       | P(γ) | L9MFF6 | ELW84997.1/WP_002049354.1     | 156 | Short-BLUF | 489 |
| Acinetobacter baumannii OIFC021       | P(γ) | L9M8U5 | ELW83379.1/WP_002050218.1     | 141 | Short-BLUF | 490 |
| Acinetobacter baumannii OIFC032       | P(γ) | J5I903 | EJP41595.1/WP_001102890.1     | 156 | Short-BLUF | 491 |
| Acinetobacter baumannii OIFC035       | P(γ) | K6NZL3 | EKP69017.1/WP_002132039.1     | 156 | Short-BLUF | 492 |
| Acinetobacter baumannii OIFC035       | P(γ) | K6NTF7 | EKP66878.1/WP_002050218.1     | 141 | Short-BLUF | 493 |
| Acinetobacter baumannii OIFC047       | P(γ) | L9NCI1 | ELW97145.1/WP_001102887.1     | 156 | Short-BLUF | 494 |
| Acinetobacter baumannii OIFC065       | P(γ) | K6LT01 | EKP36620.1/YP_001847089.1     | 156 | Short-BLUF | 495 |
| Acinetobacter baumannii OIFC074       | P(γ) | K5Q9S4 | EKL46135.1/YP_001713224.1     | 156 | Short-BLUF | 496 |
| Acinetobacter baumannii OIFC087       | P(γ) | K6LPN9 | EKP41027.1/WP_001102890.1     | 156 | Short-BLUF | 497 |
| Acinetobacter baumannii OIFC098       | P(γ) | K5PV19 | EKL41434.1/YP_001847089.1     | 156 | Short-BLUF | 498 |
| Acinetobacter baumannii OIFC099       | P(γ) | K6LQV6 | EKP41452.1/WP_001102890.1     | 156 | Short-BLUF | 499 |
| Acinetobacter baumannii OIFC109       | P(γ) | J0TMG8 | EJG27711.1/WP_001102890.1     | 156 | Short-BLUF | 500 |
| Acinetobacter baumannii OIFC110       | P(γ) | K5RVQ7 | EKL57522.1/YP_001847089.1     | 156 | Short-BLUF | 501 |
| Acinetobacter baumannii OIFC111       | P(γ) | K6M4D7 | EKP46227.1/YP_001847089.1     | 156 | Short-BLUF | 502 |
| Acinetobacter baumannii OIFC137       | P(γ) | J0S923 | EJG10461.1/WP_001102890.1     | 156 | Short-BLUF | 503 |
| Acinetobacter baumannii OIFC143       | P(γ) | J0T757 | EJG19269.1/WP_001102890.1     | 156 | Short-BLUF | 504 |
| Acinetobacter baumannii OIFC180       | P(γ) | K5RHA5 | EKL52712.1/YP_001847089.1     | 156 | Short-BLUF | 505 |
| Acinetobacter baumannii OIFC189       | P(γ) | J0SZ83 | EJG19316.1/YP_001847089.1     | 156 | Short-BLUF | 506 |
| Acinetobacter baumannii OIFC338       | P(γ) | L9N142 | ELW92889.1/YP_001847089.1     | 156 | Short-BLUF | 507 |
| Acinetobacter baumannii strain 1656-2 | P(γ) | E8PHF0 | YP_001847089.1                | 156 | Short-BLUF | 508 |
| Acinetobacter baumannii TCDC-AB0715   | P(γ) | F0QKL9 | YP_005799504.1/YP_001847089.1 | 156 | Short-BLUF | 509 |
| Acinetobacter baumannii TYTH-1        | P(γ) | K0HGX0 | AFU38785.1/YP_001847089.1     | 156 | Short-BLUF | 510 |
| Acinetobacter baumannii WC-136        | P(γ) | K9CVT9 | WP_002115327.1                | 156 | Short-BLUF | 511 |
| Acinetobacter baumannii WC-136        | P(γ) | K9CRD3 | WP_002115633.1                | 141 | Short-BLUF | 512 |
| Acinetobacter baumannii WC-141        | P(γ) | K9A8F1 | WP_009389951.1                | 156 | Short-BLUF | 513 |
| Acinetobacter baumannii WC-141        | P(γ) | K8ZYY4 | WP_009387234.1                | 141 | Short-BLUF | 514 |
| Acinetobacter baumannii WC-323        | P(γ) | K9BIS2 | EKU54817/WP_005230460.1       | 156 | Short-BLUF | 515 |
| Acinetobacter baumannii WC-323        | P(γ) | K9BM26 | WP_009511737.1                | 155 | Short-BLUF | 516 |
| Acinetobacter baumannii WC-323        | P(γ) | K9B986 | WP_009515481.1                | 147 | Short-BLUF | 517 |
| Acinetobacter baumannii WC-323        | P(γ) | K9BC39 | WP_009511693.1                | 149 | Short-BLUF | 518 |
| Acinetobacter baumannii WC-348        | P(γ) | K9B241 | EKU53718.1/WP_001102887.1     | 156 | Short-BLUF | 519 |
| Acinetobacter baumannii WC-487        | P(γ) | K9AXM6 | EKU51999/WP_006580584.1       | 156 | Short-BLUF | 520 |
| Acinetobacter baumannii WC-487        | P(γ) | K9BLE6 | EKU60294.1/WP_002050218.1     | 141 | Short-BLUF | 521 |
| Acinetobacter baumannii WC-692        | P(γ) | K1ESG1 | EKA71749.1/YP_001847089.1     | 156 | Short-BLUF | 522 |
| Acinetobacter baumannii WC-A-694      | P(γ) | K6MFE1 | EKP63369.1/WP_001102890.1     | 156 | Short-BLUF | 523 |
| Acinetobacter baumannii WC-A-92       | P(γ) | L9M673 | WP_001102886.1                | 156 | Short-BLUF | 524 |
| Acinetobacter baumannii ZWS1122       | P(γ) | K2ILA9 | EKE59799.1/YP_001847089.1     | 156 | Short-BLUF | 525 |
| Acinetobacter baumannii ZWS1219       | P(γ) | K2HQ55 | EKE59891.1/YP_001847089.1     | 156 | Short-BLUF | 526 |

|     |                                                         |      |        |                           |     |            |     |
|-----|---------------------------------------------------------|------|--------|---------------------------|-----|------------|-----|
| 185 | <i>Acinetobacter baylyi</i> DSM 14961 = CIP 107474      | P(γ) | N9B659 | YP_046740.1               | 155 | Short-BLUF | 527 |
|     |                                                         |      | N9BCT4 | WP_004927632.1            | 148 | Short-BLUF | 528 |
|     |                                                         |      | N9BED0 | YP_046178.1               | 149 | Short-BLUF | 529 |
|     |                                                         |      | N8ZXW2 | WP_004927624.1            | 155 | Short-BLUF | 530 |
| 186 | <i>Acinetobacter beijerinckii</i> ANC 3835              | P(γ) | N9FTS1 | WP_005051584.1            | 157 | Short-BLUF | 531 |
|     |                                                         |      | N9F6Z4 | WP_005055777.1            | 155 | Short-BLUF | 532 |
|     |                                                         |      | N9FJQ5 | WP_005054245.1            | 138 | Short-BLUF | 533 |
|     |                                                         |      | N9FDZ0 | WP_005055778.1            | 149 | Short-BLUF | 534 |
|     | <i>Acinetobacter beijerinckii</i> CIP 110307            | P(γ) | N9FHE8 | WP_005059436.1            | 157 | Short-BLUF | 535 |
| 187 | <i>Acinetobacter bereziniae</i> CIP 70.12               | P(γ) | N9F616 | WP_005029839.1            | 155 | Short-BLUF | 536 |
|     |                                                         |      | N9F7L1 | ENW00876.1/WP_004830862.1 | 147 | Short-BLUF | 537 |
|     |                                                         |      | N9DPW4 | WP_005029837.1            | 149 | Short-BLUF | 538 |
|     | <i>Acinetobacter bereziniae</i> NIPH 3                  | P(γ) | N8YPM4 | ENV21180.1/WP_004831317.1 | 155 | Short-BLUF | 539 |
|     |                                                         |      | N8YQK9 | ENV21525.1/WP_004830862.1 | 147 | Short-BLUF | 540 |
|     |                                                         |      | N8YIN9 | ENV21179.1/WP_004831316.1 | 149 | Short-BLUF | 541 |
| 188 | <i>Acinetobacter calcoaceticus</i>                      | P(γ) |        | WP_017392001.1            | 156 | Short-BLUF | 542 |
|     |                                                         |      |        | WP_017392001.1            | 156 | Short-BLUF | 543 |
|     |                                                         |      |        | WP_017480957.1            | 89  | Short-BLUF | 544 |
|     | <i>Acinetobacter calcoaceticus</i> (strain PHEA-2)      | P(γ) | F0KGE8 | YP_004995739.1            | 141 | Short-BLUF | 545 |
|     |                                                         |      | F0KII1 | ADY82317.1/YP_004995999.1 | 156 | Short-BLUF | 546 |
|     | <i>Acinetobacter calcoaceticus</i> ANC 3680             | P(γ) | N9EC09 | WP_005039435.1            | 156 | Short-BLUF | 547 |
|     | <i>Acinetobacter calcoaceticus</i> ANC 3811             | P(γ) | R8Y6J9 | WP_016137597.1            | 156 | Short-BLUF | 548 |
|     |                                                         |      | R8Y874 | WP_016138168.1            | 161 | Short-BLUF | 549 |
|     | <i>Acinetobacter calcoaceticus</i> DSM 30006 = CIP 81.8 | P(γ) | N9F0B6 | ENV98323.1/WP_004643428.1 | 156 | Short-BLUF | 550 |
|     | <i>Acinetobacter calcoaceticus</i> NIPH 13              | P(γ) | N8PJK1 | ENU09837.1/WP_004643428.1 | 156 | Short-BLUF | 551 |
|     | <i>Acinetobacter calcoaceticus</i> RUH2202              | P(γ) | D0S286 | WP_003650777.1            | 156 | Short-BLUF | 552 |
| 189 | <i>Acinetobacter gerneri</i>                            | P(γ) | N8YFI2 | WP_004871730.1            | 157 | Short-BLUF | 553 |
| 190 | <i>Acinetobacter guillouiae</i> CIP 63.46               | P(γ) | N8S7G3 | ENU59170.1/WP_004719325.1 | 142 | Short-BLUF | 554 |
|     |                                                         |      | N8THK4 | ENU57977.1/WP_004721233.1 | 155 | Short-BLUF | 555 |
|     |                                                         |      | N8S437 | WP_004721230.1            | 149 | Short-BLUF | 556 |
|     | <i>Acinetobacter guillouiae</i> MSP4-18                 | P(γ) | S3Z3U9 | EPH37159.1/WP_004719325.1 | 142 | Short-BLUF | 557 |
|     |                                                         |      | S3ZKX5 | EPH38960.1/WP_004721233.1 | 155 | Short-BLUF | 558 |
|     | <i>Acinetobacter guillouiae</i> NIPH 991                | P(γ) | N8WUW8 | WP_004822451.1            | 142 | Short-BLUF | 559 |
|     |                                                         |      | N8WXK7 | WP_004820747.1            | 155 | Short-BLUF | 560 |
|     |                                                         |      | N8YB72 | WP_004820748.1            | 149 | Short-BLUF | 561 |
| 191 | <i>Acinetobacter gyllenbergii</i>                       | P(γ) |        | WP_023269848.1            | 147 | Short-BLUF | 562 |
|     |                                                         |      |        | WP_023269642.1            | 155 | Short-BLUF | 563 |
|     | <i>Acinetobacter gyllenbergii</i> CIP 110306            | P(γ) | S3PY91 | EPF83591.1/WP_016539987.1 | 155 | Short-BLUF | 564 |
|     |                                                         |      | S3PP26 | EPF88044.1/WP_016540194.1 | 147 | Short-BLUF | 565 |
|     | <i>Acinetobacter gyllenbergii</i> MTCC 11365            | P(γ) | S3YW62 | EPH35666.1/WP_016539987.1 | 155 | Short-BLUF | 566 |
|     |                                                         |      | S3ZBX9 | EPH35880.1/WP_016540194.1 | 147 | Short-BLUF | 567 |
| 192 | <i>Acinetobacter haemolyticus</i> ATCC 19194            | P(γ) | D4XPD9 | WP_004638534.1            | 128 | Short-BLUF | 568 |
|     | <i>Acinetobacter haemolyticus</i> CIP 64.3              | P(γ) | N9F599 | WP_005082086.1            | 141 | Short-BLUF | 569 |
|     | <i>Acinetobacter haemolyticus</i> NIPH 261              | P(γ) | N9GP72 | WP_005090981.1            | 141 | Short-BLUF | 570 |
| 193 | <i>Acinetobacter indicus</i> ANC 4215                   | P(γ) | S3N2L2 | WP_016659098.1            | 144 | Short-BLUF | 571 |
| 194 | <i>Acinetobacter johnsonii</i> ANC 3681                 | P(γ) | N9CQ68 | WP_004982048.1            | 141 | Short-BLUF | 572 |
|     | <i>Acinetobacter johnsonii</i> CIP 64.6                 | P(γ) | N8RTR2 | WP_004696426.1            | 141 | Short-BLUF | 573 |
|     | <i>Acinetobacter johnsonii</i> SH046                    | P(γ) | D0SCH6 | WP_005400678.1            | 156 | Short-BLUF | 574 |
| 195 | <i>Acinetobacter lwoffii</i>                            | P(γ) |        | WP_010327040.1            | 141 | Short-BLUF | 575 |
|     |                                                         |      |        | WP_016806942.1            | 156 | Short-BLUF | 576 |
|     | <i>Acinetobacter lwoffii</i> CIP 70.31                  | P(γ) | N9HDC8 | ENW29835.1/WP_004278796.1 | 143 | Short-BLUF | 577 |
|     |                                                         |      | N9H602 | ENW27250.1/WP_005104921.1 | 157 | Short-BLUF | 578 |
|     |                                                         |      | N9G8Z9 | WP_005102339.1            | 149 | Short-BLUF | 579 |

|     |                                                    |      |        |                           |     |            |     |
|-----|----------------------------------------------------|------|--------|---------------------------|-----|------------|-----|
|     | <i>Acinetobacter lwoffii</i> NCTC 5866 = CIP 64.10 | P(γ) | N9FL15 | ENW23433.1/WP_005097246.1 | 143 | Short-BLUF | 580 |
|     |                                                    |      | N9FRT2 | ENW25392.1/WP_004281912.1 | 157 | Short-BLUF | 581 |
|     | <i>Acinetobacter lwoffii</i> NIPH 478              | P(γ) | N9GA40 | WP_005106614.1            | 143 | Short-BLUF | 582 |
|     |                                                    |      | N9G1N1 | ENW28923 /WP_004281912.1  | 157 | Short-BLUF | 583 |
|     | <i>Acinetobacter lwoffii</i> NIPH 715              | P(γ) | N8TVU5 | ENU62389.1/WP_004278796.1 | 143 | Short-BLUF | 584 |
|     |                                                    |      | N8TZW9 | ENU64062.1/WP_004729009.1 | 157 | Short-BLUF | 585 |
|     | <i>Acinetobacter lwoffii</i> SH145                 | P(γ) | D0SQ9  | EEY88544.1/WP_004281912.1 | 157 | Short-BLUF | 586 |
|     |                                                    |      | D0ST39 | EEY90693.1/WP_004278796.1 | 143 | Short-BLUF | 587 |
| 196 | <i>Acinetobacter nectaris</i>                      | P(γ) |        | WP_023272517.1            | 164 | Short-BLUF | 588 |
|     |                                                    |      |        | WP_023274063.1            | 154 | Short-BLUF | 589 |
| 197 | <i>Acinetobacter nosocomialis</i>                  | P(γ) |        | WP_006581725.1            | 150 | Short-BLUF | 590 |
|     |                                                    |      |        | WP_017398279.1            | 158 | Short-BLUF | 591 |
|     |                                                    |      |        | WP_016804882.1            | 192 | Short-BLUF | 592 |
|     |                                                    |      |        | WP_017392774.1            | 158 | Short-BLUF | 593 |
|     | <i>Acinetobacter nosocomialis</i> Ab22222          | P(γ) | K2PWD6 | WP_006580584.1            | 156 | Short-BLUF | 594 |
|     |                                                    |      | K2PVW2 | WP_006581982.1            | 147 | Short-BLUF | 595 |
|     | <i>Acinetobacter nosocomialis</i> NIPH 2119        | P(γ) | N8RB52 | ENU48161/WP_002049354.1   | 156 | Short-BLUF | 596 |
|     |                                                    |      | N8SP20 | ENU47659.1/WP_004708845.1 | 147 | Short-BLUF | 597 |
|     | <i>Acinetobacter nosocomialis</i> NIPH 386         | P(γ) | N8YWQ6 | WP_004886335.1            | 156 | Short-BLUF | 598 |
|     |                                                    |      | N8YS47 | ENV39612.1/WP_004708845.1 | 147 | Short-BLUF | 599 |
| 198 | <i>Acinetobacter oleivorans</i>                    | P(γ) |        | WP_023274242.1            | 147 | Short-BLUF | 600 |
| 199 | <i>Acinetobacter parvus</i> DSM 16617 = CIP 108168 | P(γ) | N8QCF2 | WP_004682504.1            | 142 | Short-BLUF | 601 |
| 200 | <i>Acinetobacter pittii</i>                        | P(γ) |        | WP_023187856.1            | 141 | Short-BLUF | 602 |
|     | <i>Acinetobacter pittii</i> ANC 3678               | P(γ) | N9G3B5 | WP_005068354.1            | 156 | Short-BLUF | 603 |
|     |                                                    |      | N9ENJ6 | WP_005068879.1            | 147 | Short-BLUF | 604 |
|     | <i>Acinetobacter pittii</i> ANC 4050               | P(γ) | R8YQG3 | WP_016140521.1            | 156 | Short-BLUF | 605 |
|     |                                                    |      | R8YMS0 | WP_016140719.1            | 147 | Short-BLUF | 606 |
|     | <i>Acinetobacter pittii</i> ANC 4052               | P(γ) | R8YV96 | WP_016145865.1            | 156 | Short-BLUF | 607 |
|     |                                                    |      | R8YV13 | WP_016145659.1            | 147 | Short-BLUF | 608 |
|     | <i>Acinetobacter pittii</i> CIP 70.29              | P(γ) | N9EK11 | YP_004995999.1            | 156 | Short-BLUF | 609 |
|     |                                                    |      | N9EKQ9 | WP_005073889.1            | 147 | Short-BLUF | 610 |
| 201 | <i>Acinetobacter radioresistens</i>                | P(γ) |        | WP_017401064.1            | 208 | Short-BLUF | 611 |
|     |                                                    |      |        | WP_017401136.1            | 185 | Short-BLUF | 612 |
|     | <i>Acinetobacter radioresistens</i> DSM 6976       | P(γ) | K6W0U9 | WP_005404197.1            | 140 | Short-BLUF | 613 |
|     |                                                    |      | K6VGN5 | ENV88969.1/WP_005025739.1 | 146 | Short-BLUF | 614 |
|     |                                                    |      | K6UYR6 | WP_005025735.1            | 147 | Short-BLUF | 615 |
|     |                                                    |      | K6UIB5 | WP_005025720.1            | 158 | Short-BLUF | 616 |
|     | <i>Acinetobacter radioresistens</i> NIPH 2130      | P(γ) | N9E4V1 | WP_005014499.1            | 146 | Short-BLUF | 617 |
|     |                                                    |      | N9DVX6 | WP_005019483.1            | 146 | Short-BLUF | 618 |
|     |                                                    |      | N9E4J8 | WP_005014506.1            | 147 | Short-BLUF | 619 |
|     | <i>Acinetobacter radioresistens</i> SH164          | P(γ) | D0T1D2 | EEY87475.1/WP_005014499.1 | 146 | Short-BLUF | 620 |
|     |                                                    |      | D0T5A8 | EEY86881.1/WP_005019483.1 | 146 | Short-BLUF | 621 |
|     |                                                    |      | D0T1Y5 | EEY87678.1/WP_005404197.1 | 140 | Short-BLUF | 622 |
|     |                                                    |      | D0T1A1 | WP_005404152.1            | 152 | Short-BLUF | 623 |
|     |                                                    |      | D0T1D4 | WP_005404170.1            | 154 | Short-BLUF | 624 |
|     |                                                    |      | D0T1E1 | WP_005014522.1            | 118 | Short-BLUF | 625 |
|     | <i>Acinetobacter radioresistens</i> SK82           | P(γ) | C6RNE8 | EET82638.1/WP_005404197.1 | 140 | Short-BLUF | 626 |
|     |                                                    |      | C6RPU2 | WP_005405185.1            | 148 | Short-BLUF | 627 |
|     |                                                    |      | C6RLZ1 | EET83186.1/WP_005014522.1 | 118 | Short-BLUF | 628 |
|     |                                                    |      | C6RQ12 | EET82088.1/WP_005019483.1 | 146 | Short-BLUF | 629 |
|     |                                                    |      | C6RLZ9 | EET83194.1/WP_005014499.1 | 146 | Short-BLUF | 630 |
|     |                                                    |      | C6RLZ8 | EET83193.1/WP_005014506.1 | 147 | Short-BLUF | 631 |
|     | <i>Acinetobacter radioresistens</i> WC-A-157       | P(γ) | J4ZH05 | WP_005405555.1            | 140 | Short-BLUF | 632 |

|     |                                            |      |        |                           |     |            |     |
|-----|--------------------------------------------|------|--------|---------------------------|-----|------------|-----|
|     |                                            |      | J4ZPX4 | EJO37381.1/WP_005025739.1 | 146 | Short-BLUF | 633 |
|     |                                            |      | J4Z2C2 | WP_005407064.1            | 146 | Short-BLUF | 634 |
|     |                                            |      | J4JB98 | WP_005405508.1            | 148 | Short-BLUF | 635 |
|     |                                            |      | J4ZHC1 | WP_005405601.1            | 158 | Short-BLUF | 636 |
| 202 | <i>Acinetobacter schindleri</i> CIP 107287 | P(γ) | N9AFC9 | WP_004892906.1            | 142 | Short-BLUF | 637 |
|     |                                            |      | N8ZAE4 | ENV45921.1/WP_004897488.1 | 156 | Short-BLUF | 638 |
|     | <i>Acinetobacter schindleri</i> NIPH 900   | P(γ) | N8XZD8 | ENV12748.1/WP_004815687.1 | 142 | Short-BLUF | 639 |
|     |                                            |      | N8WNA0 | WP_004813968.1            | 156 | Short-BLUF | 640 |
| 203 | <i>Acinetobacter soli</i> CIP 110264       | P(γ) | N9BKH9 | WP_004938488.1            | 155 | Short-BLUF | 641 |
|     |                                            |      | N9A8X8 | WP_004937197.1            | 148 | Short-BLUF | 642 |
|     |                                            |      | N9BMU6 | ENV57428.1/WP_004937200.1 | 148 | Short-BLUF | 643 |
|     |                                            |      | N9BJV1 | WP_004938129.1            | 155 | Short-BLUF | 644 |
|     |                                            |      | N9A568 | ENV56437.1/WP_004938066.1 | 152 | Short-BLUF | 645 |
|     | <i>Acinetobacter soli</i> CIP 110264       | P(γ) | N9A5P2 | ENV56587.1/WP_004938485.1 | 150 | Short-BLUF | 646 |
|     | <i>Acinetobacter soli</i> NIPH 2899        | P(γ) | N9AFQ3 | WP_004947954.1            | 155 | Short-BLUF | 647 |
|     |                                            |      | N9AFF8 | WP_004946942.1            | 148 | Short-BLUF | 648 |
|     |                                            |      | N9BN22 | ENV59724.1/WP_004937200.1 | 148 | Short-BLUF | 649 |
|     |                                            |      | N9AFI2 | ENV60082.1/WP_004938066.1 | 152 | Short-BLUF | 650 |
|     |                                            |      | N9AGU9 | ENV60181.1/WP_004938485.1 | 150 | Short-BLUF | 651 |
| 204 | <i>Acinetobacter</i> sp. 93A2              | P(γ) | Q933L6 | YP_046178.1               | 149 | Short-BLUF | 652 |
|     | <i>Acinetobacter</i> sp. ADP1              | P(γ) | Q6FAI1 | YP_046754.1               | 149 | Short-BLUF | 653 |
|     |                                            |      | Q6FAJ5 | CAG68918.1/YP_046740.1    | 155 | Short-BLUF | 654 |
|     |                                            |      | Q6FAH9 | YP_046756.1               | 163 | Short-BLUF | 655 |
|     |                                            |      | Q7BC36 | CAG68356.1/YP_046178.1    | 149 | Short-BLUF | 656 |
|     | <i>Acinetobacter</i> sp. ANC 3880          | P(γ) | N9T085 | ENX57062.1/WP_005189133.1 | 155 | Short-BLUF | 657 |
|     |                                            |      | N9T0N2 | ENX56900.1/WP_004807238.1 | 148 | Short-BLUF | 658 |
|     |                                            |      | N9RGG2 | ENX57063.1/WP_005189145.1 | 149 | Short-BLUF | 659 |
|     | <i>Acinetobacter</i> sp. ANC 3929          | P(γ) | N9LK71 | WP_005152839.1            | 147 | Short-BLUF | 660 |
|     | <i>Acinetobacter</i> sp. ANC 3994          | P(γ) | N8QCC6 | WP_004648902.1            | 145 | Short-BLUF | 661 |
|     | <i>Acinetobacter</i> sp. ANC 4105          | P(γ) | N9MQW8 | ENW92349.1/WP_005189133.1 | 155 | Short-BLUF | 662 |
|     |                                            |      | N9L7C0 | WP_005188667.1            | 148 | Short-BLUF | 663 |
|     |                                            |      | N9MGG1 | ENW92350.1/WP_005189145.1 | 149 | Short-BLUF | 664 |
|     | <i>Acinetobacter</i> sp. ATCC 27244        | P(γ) | C0VK32 | WP_008940976.1            | 141 | Short-BLUF | 665 |
|     | <i>Acinetobacter</i> sp. CIP 101934        | P(γ) | N9NFB7 | ENX00710.1/WP_004815687.1 | 142 | Short-BLUF | 666 |
|     |                                            |      | N9NKY1 | ENX03417.1/WP_004897488.1 | 156 | Short-BLUF | 667 |
|     | <i>Acinetobacter</i> sp. CIP 101966        | P(γ) | N9P0F1 | WP_005263266.1            | 143 | Short-BLUF | 668 |
|     |                                            |      | N9NWM1 | ENX25468/WP_005104921.1   | 157 | Short-BLUF | 669 |
|     | <i>Acinetobacter</i> sp. CIP 102082        | P(γ) | N8WM85 | ENU96377.1/WP_004757740.1 | 142 | Short-BLUF | 670 |
|     | <i>Acinetobacter</i> sp. CIP 102129        | P(γ) | N8VLK0 | WP_004761518.1            | 142 | Short-BLUF | 671 |
|     | <i>Acinetobacter</i> sp. CIP 102136        | P(γ) | N9PPP9 | WP_005252160.1            | 143 | Short-BLUF | 672 |
|     |                                            |      | N9NCH2 | ENX18668.1/WP_004729009.1 | 157 | Short-BLUF | 673 |
|     | <i>Acinetobacter</i> sp. CIP 102143        | P(γ) | N9TH59 | ENX62685.1/WP_004757740.1 | 142 | Short-BLUF | 674 |
|     | <i>Acinetobacter</i> sp. CIP 102159        | P(γ) | N8U5M8 | ENU82816.1/WP_004757740.1 | 142 | Short-BLUF | 675 |
|     | <i>Acinetobacter</i> sp. CIP 102529        | P(γ) | N8UNT2 | ENU89135.1/WP_004757740.1 | 142 | Short-BLUF | 676 |
|     | <i>Acinetobacter</i> sp. CIP 102637        | P(γ) | N8XF19 | WP_004799395.1            | 142 | Short-BLUF | 677 |
|     | <i>Acinetobacter</i> sp. CIP 110321        | P(γ) | R9AZG9 | WP_016163638.1            | 148 | Short-BLUF | 678 |
|     | <i>Acinetobacter</i> sp. CIP 51.11         | P(γ) | N9MYK0 | WP_005247271.1            | 143 | Short-BLUF | 679 |
|     |                                            |      | N9N647 | WP_005245564.1            | 157 | Short-BLUF | 680 |
|     | <i>Acinetobacter</i> sp. CIP 53.82         | P(γ) | N9MHW6 | WP_005178747.1            | 144 | Short-BLUF | 681 |
|     | <i>Acinetobacter</i> sp. CIP 56.2          | P(γ) | N8XEK4 | ENV07524.1/WP_004807238.1 | 148 | Short-BLUF | 682 |
|     | <i>Acinetobacter</i> sp. CIP 64.2          | P(γ) | N9N2S2 | WP_005241169.1            | 155 | Short-BLUF | 683 |
|     |                                            |      | N9PKT7 | WP_005241451.1            | 147 | Short-BLUF | 684 |
|     |                                            |      | N9PKB9 | WP_005241167.1            | 148 | Short-BLUF | 685 |



|  |                                      |      |        |                            |     |            |     |
|--|--------------------------------------|------|--------|----------------------------|-----|------------|-----|
|  | <i>Acinetobacter</i> sp. CIP 64.7    | P(γ) | N9QVJ7 | ENX30917.1/WP_004278796.1  | 143 | Short-BLUF | 686 |
|  |                                      |      | N9QHH3 | ENX26357.1/WP_004729009.1  | 157 | Short-BLUF | 687 |
|  | <i>Acinetobacter</i> sp. CIP 70.18   | P(γ) | N9ST00 | ENX57771.1/WP_005189133.1  | 155 | Short-BLUF | 688 |
|  |                                      |      | N9T3L2 | ENX57935.1/WP_004807238.1  | 148 | Short-BLUF | 689 |
|  | <i>Acinetobacter</i> sp. CIP A162    | P(γ) | N8Q5C3 | WP_004645416.1             | 143 | Short-BLUF | 690 |
|  |                                      |      | N8Q0C9 | ENU15332.1/WP_004281912.1  | 157 | Short-BLUF | 691 |
|  | <i>Acinetobacter</i> sp. COS3        | P(γ) |        | WP_023013276.1             | 148 | Short-BLUF | 692 |
|  | <i>Acinetobacter</i> sp. DR1         | P(γ) | D8JK77 | YP_003732271.1             | 161 | Short-BLUF | 693 |
|  |                                      |      | D8JFY6 | YP_003731440.1             | 156 | Short-BLUF | 694 |
|  | <i>Acinetobacter</i> sp. GG2         | P(γ) |        | WP_019458416.1             | 156 | Short-BLUF | 695 |
|  |                                      |      |        | WP_019459106.1             | 161 | Short-BLUF | 696 |
|  | <i>Acinetobacter</i> sp. HA          | P(γ) | I4ZUE1 | EIM39833.1/WP_004815687.1  | 142 | Short-BLUF | 697 |
|  |                                      |      | I4ZQ16 | WP_008306942.1             | 156 | Short-BLUF | 698 |
|  | <i>Acinetobacter</i> sp. MDS7A       | P(γ) |        | WP_019836199.1             | 157 | Short-BLUF | 699 |
|  | <i>Acinetobacter</i> sp. NBRC 100985 | P(γ) | G7GFE4 | WP_007482358.1             | 148 | Short-BLUF | 700 |
|  |                                      |      | G7GDM0 | WP_007481279.1             | 155 | Short-BLUF | 701 |
|  | <i>Acinetobacter</i> sp. NIPH 1847   | P(γ) | N9NUS5 | ENX05670.1/WP_005230460.1  | 156 | Short-BLUF | 702 |
|  |                                      |      | N9MA43 | WP_005230039.1             | 153 | Short-BLUF | 703 |
|  |                                      |      | N9MAQ2 | WP_005230366.1             | 147 | Short-BLUF | 704 |
|  |                                      |      | N9NRU6 | WP_005230037.1             | 149 | Short-BLUF | 705 |
|  | <i>Acinetobacter</i> sp. NIPH 1859   | P(γ) | N9R7K2 | WP_005270554.1             | 147 | Short-BLUF | 706 |
|  | <i>Acinetobacter</i> sp. NIPH 1867   | P(γ) | N9R0C8 | WP_005211997.1             | 155 | Short-BLUF | 707 |
|  |                                      |      | N9SKL2 | WP_005212260.1             | 148 | Short-BLUF | 708 |
|  |                                      |      | N9SJJ0 | WP_005211995.1             | 149 | Short-BLUF | 709 |
|  | <i>Acinetobacter</i> sp. NIPH 2036   | P(γ) | S3T8J5 | WP_016652452.1             | 147 | Short-BLUF | 710 |
|  | <i>Acinetobacter</i> sp. NIPH 2100   | P(γ) | N9RFY9 | WP_005293946.1             | 147 | Short-BLUF | 711 |
|  | <i>Acinetobacter</i> sp. NIPH 2168   | P(γ) | N9Q857 | WP_005257675.1             | 156 | Short-BLUF | 712 |
|  |                                      |      | N9Q7N9 | WP_005257454.1             | 147 | Short-BLUF | 713 |
|  | <i>Acinetobacter</i> sp. NIPH 2171   | P(γ) | N9MH86 | WP_005236029.1             | 143 | Short-BLUF | 714 |
|  |                                      |      | N9MRD9 | ENX11134/WP_004780330.1    | 156 | Short-BLUF | 715 |
|  |                                      |      | N9MLJ6 | ENX09453.1/WP_004782875.1  | 146 | Short-BLUF | 716 |
|  |                                      |      | N9P2N4 | WP_005235635.1             | 147 | Short-BLUF | 717 |
|  | <i>Acinetobacter</i> sp. NIPH 3623   | P(γ) | N9RE67 | ENX36920.1/WP_005230460.1  | 156 | Short-BLUF | 718 |
|  |                                      |      | N9PWE1 | WP_005285390.1             | 155 | Short-BLUF | 719 |
|  |                                      |      | N9PX04 | WP_005285742.1             | 147 | Short-BLUF | 720 |
|  |                                      |      | N9PWA3 | WP_005285387.1             | 149 | Short-BLUF | 721 |
|  | <i>Acinetobacter</i> sp. NIPH 542    | P(γ) | N9RMM9 | WP_005306937.1             | 156 | Short-BLUF | 722 |
|  |                                      |      | N9QI40 | WP_005305097.1             | 147 | Short-BLUF | 723 |
|  | <i>Acinetobacter</i> sp. NIPH 713    | P(γ) | N9KUS9 | ENW87773.1/WP_005097246.1  | 143 | Short-BLUF | 724 |
|  |                                      |      | N9KN55 | WP_005173613.1             | 149 | Short-BLUF | 725 |
|  | <i>Acinetobacter</i> sp. NIPH 758    | P(γ) | N8UVT4 | WP_004772199.1             | 156 | Short-BLUF | 726 |
|  |                                      |      | N8W7V8 | WP_004772105.1             | 147 | Short-BLUF | 727 |
|  | <i>Acinetobacter</i> sp. NIPH 809    | P(γ) | N8QJS9 | WP_004653704.1             | 155 | Short-BLUF | 728 |
|  |                                      |      | N8QQ22 | WP_004653401.1             | 147 | Short-BLUF | 729 |
|  |                                      |      | N8QQ45 | WP_004653706.1             | 149 | Short-BLUF | 730 |
|  | <i>Acinetobacter</i> sp. NIPH 817    | P(γ) | N8VUX6 | WP_004791296.1             | 156 | Short-BLUF | 731 |
|  |                                      |      | N8VSG1 | WP_004792481.1             | 161 | Short-BLUF | 732 |
|  | <i>Acinetobacter</i> sp. NIPH 899    | P(γ) | N8WTX6 | WP_004783886.1             | 143 | Short-BLUF | 733 |
|  |                                      |      | N8VMF9 | ENV00711.1/WP_004780330.1  | 156 | Short-BLUF | 734 |
|  |                                      |      | N8VIL1 | ENU99395.1/WP_004782875.1  | 146 | Short-BLUF | 735 |
|  | <i>Acinetobacter</i> sp. NIPH 973    | P(γ) | N8SCA4 | WP_004700647.1             | 156 | Short-BLUF | 736 |
|  | <i>Acinetobacter</i> sp. P8-3-8      | P(γ) |        | WP_010115938.1             | 149 | Short-BLUF | 737 |
|  | <i>Acinetobacter</i> sp. RUH2624     | P(γ) | D0BZX2 | EEEX00046.1/WP_004708845.1 | 147 | Short-BLUF | 738 |



|     |                                                           |       |        |                           |      |                    |     |
|-----|-----------------------------------------------------------|-------|--------|---------------------------|------|--------------------|-----|
|     |                                                           |       | D0BX54 | EEX01065.1/WP_006580584.1 | 156  | Short-BLUF         | 739 |
|     | <i>Acinetobacter</i> sp. SH024                            | P(γ)  | D6JU40 | EFF86339.1/WP_002115327.1 | 156  | Short-BLUF         | 740 |
|     |                                                           |       | D6JTD2 | WP_005803474.1            | 147  | Short-BLUF         | 741 |
|     | <i>Acinetobacter</i> sp. WC-743                           | P(γ)  | L9MH55 | ELW86565.1/WP_004831317.1 | 155  | Short-BLUF         | 742 |
|     |                                                           |       | L9ME93 | ELW84587.1/WP_004830862.1 | 147  | Short-BLUF         | 743 |
|     |                                                           |       | L9ME60 | WP_009585312.1            | 147  | Short-BLUF         | 744 |
|     |                                                           |       | L9MHY5 | ELW86514.1/WP_004831316.1 | 149  | Short-BLUF         | 745 |
| 205 | <i>Acinetobacter tandoii</i> DSM 14970 = CIP 107469       | P(γ)  | R9B235 | WP_016166413.1            | 140  | Short-BLUF         | 746 |
| 206 | <i>Acinetobacter ursingii</i> ANC 3649                    | P(γ)  | N9DFL6 | WP_005004065.1            | 141  | Short-BLUF         | 747 |
|     |                                                           |       | N9DGY2 | WP_005002881.1            | 155  | Short-BLUF         | 748 |
|     | <i>Acinetobacter ursingii</i> DSM 16037 = CIP 107286      | P(γ)  | N9D109 | WP_004989315.1            | 141  | Short-BLUF         | 749 |
|     |                                                           |       | N9D4M0 | ENV75720.1/WP_004990933.1 | 155  | Short-BLUF         | 750 |
|     | <i>Acinetobacter ursingii</i> NIPH 706                    | P(γ)  | N9QSA7 | WP_004997440.1            | 141  | Short-BLUF         | 751 |
|     |                                                           |       | N9QT74 | ENX49024.1/WP_004990933.1 | 155  | Short-BLUF         | 752 |
| 207 | <i>Acinetobacter venetianus</i>                           | P(γ)  |        | WP_017196667.1            | 147  | Short-BLUF         | 753 |
|     |                                                           |       |        | WP_019384317.1            | 148  | Short-BLUF         | 754 |
|     | <i>Acinetobacter venetianus</i> RAG-1 = CIP 110063        | P(γ)  | N8ZT40 | WP_004879195.1            | 148  | Short-BLUF         | 755 |
| 208 | <i>Algicola sagamiensis</i>                               | P(γ)  |        | WP_018691603.1            | 138  | Short-BLUF         | 756 |
|     |                                                           |       |        | WP_018694364.1            | 138  | Short-BLUF         | 757 |
|     |                                                           |       |        | WP_018694365.1            | 140  | Short-BLUF         | 758 |
| 209 | <i>Alishewanella agri</i> BL06                            | P(γ)  | I9DUG2 | WP_008983735.1            | 137  | Short-BLUF         | 759 |
| 210 | <i>Alishewanella jeotgali</i> KCTC 22429                  | P(γ)  | H3ZIX1 | WP_008951845.1            | 137  | Short-BLUF         | 760 |
| 211 | <i>Allochromatium vinosum</i> DSM 180                     | P(γ)  | D3RRS9 | YP_003443015.1            | 1124 | PAS+GGDEF+EAL+BLUF | 761 |
|     |                                                           |       | D3RMV8 | YP_003444278.1            | 143  | Short-BLUF         | 762 |
| 212 | <i>Alteromonadales bacterium</i> TW-7                     | P(γ)  | A0XX52 | WP_006791331.1            | 141  | Short-BLUF         | 763 |
| 214 | <i>Alteromonas macleodii</i> 'Deep ecotype'               | P(γ)  | F2G2W2 | AEA96322.1/YP_004425320.1 | 390  | BLUF+EAL           | 764 |
|     | <i>Alteromonas macleodii</i> (strain Balearic Sea AD45)   | P(γ)  | K0EAG8 | YP_006801094.1            | 395  | BLUF+EAL           | 765 |
|     | <i>Alteromonas macleodii</i> (strain Black Sea 11)        | P(γ)  | K0CTD4 | YP_006823174.1            | 395  | BLUF+EAL           | 766 |
|     | <i>Alteromonas macleodii</i> (strain English Channel 673) | P(γ)  | K0CJN8 | YP_006797210.1            | 395  | BLUF+EAL           | 767 |
|     | <i>Alteromonas macleodii</i> AltDE1                       | P(γ)  | K7RG75 | YP_004425320.1            | 390  | BLUF+EAL           | 768 |
|     | <i>Alteromonas macleodii</i> ATCC 27126                   | P(γ)  | J9Y701 | YP_006746245.1            | 405  | BLUF+EAL           | 769 |
|     | <i>Alteromonas macleodii</i> str. 'Aegean Sea MED64'      | P(γ)  | S5ATU0 | AGP80153.1                | 390  | BLUF+EAL           | 770 |
|     | <i>Alteromonas macleodii</i> str. 'Ionian Sea U4'         | P(γ)  | S5AU17 | YP_008170230.1            | 405  | BLUF+EAL           | 771 |
|     | <i>Alteromonas macleodii</i> str. 'Ionian Sea U8'         | P(γ)  | S5BLE9 | YP_008170230.1            | 405  | BLUF+EAL           | 772 |
| 215 | <i>Beggiatoa</i> sp. PS                                   | P(γ)  | A7BT71 | EDN70265.1                | 350  | BLUF+Cyclase       | 773 |
| 216 | <i>Bermanella marisrubri</i>                              | P(γ)  | Q1N3J0 | WP_007018774.1            | 163  | Short-BLUF         | 774 |
| 217 | <i>Cedecea davisae</i>                                    | P(γ)  |        | WP_016535954.1            | 401  | BLUF+EAL           | 775 |
| 218 | <i>Cellvibrio</i> sp. BR                                  | P(γ)  | I3IDC4 | WP_007638332.1            | 179  | Short-BLUF         | 776 |
| 219 | <i>Citrobacter freundii</i> 4_7_47CFAA                    | P(γ)  | G9SK57 | WP_003833502.1            | 409  | BLUF+EAL           | 777 |
|     | <i>Citrobacter freundii</i> ATCC 8090 = MTCC 1658         | P(γ)  | K8QN37 | WP_003841532.1            | 409  | BLUF+EAL           | 778 |
|     | <i>Citrobacter freundii</i> GTC 09479                     | P(γ)  | M3DUI2 | WP_003844033.1            | 409  | BLUF+EAL           | 779 |
|     | <i>Citrobacter freundii</i> GTC 09629                     | P(γ)  | R1HFL0 | EOD62395.1/WP_003020858.1 | 409  | BLUF+EAL           | 780 |
| 220 | <i>Citrobacter rodentium</i> (strain ICC168)              | P(γ)  | D2TIH4 | YP_003365120.1            | 406  | BLUF+ EAL          | 781 |
| 221 | <i>Citrobacter</i> sp. 30_2                               | P(γ)  | C1M5D7 | WP_008784992.1            | 409  | BLUF+ EAL          | 782 |
|     | <i>Citrobacter</i> sp. A1                                 | P(γ)  | J0M453 | EJF22671.1/WP_003020858.1 | 409  | BLUF+EAL           | 783 |
|     | <i>Citrobacter</i> sp. KTE151                             | P(γ)  | R8WTE8 | WP_016153346.1            | 403  | BLUF+EAL           | 784 |
|     | <i>Citrobacter</i> sp. KTE30                              | P(γ)  | R8UVC4 | WP_016150366.1            | 409  | BLUF+EAL           | 785 |
|     | <i>Citrobacter</i> sp. KTE32                              | P(γ)  | R8V9S4 | WP_016156768.1            | 403  | BLUF+EAL           | 786 |
|     | <i>Citrobacter</i> sp. L17                                | P(γ)  | K8ZLA8 | EKU35574.1/WP_003020858.1 | 409  | BLUF+EAL           | 787 |
| 222 | <i>Citrobacter youngae</i> ATCC 29220                     | P(γ)  | D4B8N0 | WP_006684233.1            | 403  | BLUF+ EAL          | 788 |
| 223 | <i>Congregibacter litoralis</i> KT71                      | P(γ)U | A4A4X0 | EAQ98841.1/WP_008294319.1 | 160  | Short-BLUF         | 789 |
|     |                                                           |       | A4ACN4 | WP_008296304.1            | 120  | Short-BLUF         | 790 |
|     |                                                           |       | A4A4X0 | EAQ98841.1/WP_008294319.1 | 160  | Short-BLUF         | 791 |

|     |                                                                     |      |        |                            |      |                    |     |
|-----|---------------------------------------------------------------------|------|--------|----------------------------|------|--------------------|-----|
| 224 | <i>Cronobacter dublinensis</i> 1210                                 | P(y) | K8AWY9 | WP_007716320.1             | 404  | BLUF+EAL           | 792 |
|     | <i>Cronobacter dublinensis</i> 582                                  | P(y) | K8AXH9 | WP_007750072.1             | 404  | BLUF+EAL           | 793 |
| 225 | <i>Cronobacter sakazakii</i> E899                                   | P(y) | F5VN29 | WP_004387288.1             | 403  | BLUF+EAL           | 794 |
| 226 | <i>Cronobacter turicensis</i> 564                                   | P(y) | K8BZ68 | WP_007767450.1             | 362  | BLUF+EAL           | 795 |
|     | <i>Cronobacter turicensis</i> DSM 18703 / LMG 23827 / z3032         | P(y) | C9XVD7 | YP_003211056.1             | 404  | BLUF+ EAL          | 796 |
|     |                                                                     |      | C9Y5C1 | YP_003212605.1             | 405  | BLUF+ EAL          | 797 |
| 227 | <i>Ectothiorhodospira</i> sp. PHS-1                                 | P(y) | H1G5T1 | WP_008932735.1             | 1090 | PAS+GGDEF+EAL+BLUF | 798 |
| 228 | <i>Endozoicomonas elysicola</i>                                     | P(y) |        | WP_020581308.1             | 159  | Short-BLUF         | 799 |
| 229 | <i>Enhydrobacter aerosaccus</i> SK60                                | P(y) | C8PY76 | WP_007116298.1             | 190  | Short-BLUF         | 800 |
|     |                                                                     |      | C8PVS3 | WP_007115447.1             | 168  | Short-BLUF         | 801 |
|     |                                                                     |      | C8PY73 | WP_007116295.1             | 143  | Short-BLUF         | 802 |
|     |                                                                     |      | C8Q1B6 | WP_007117385.1             | 217  | Short-BLUF         | 803 |
|     |                                                                     |      | C8PX01 | WP_007115875.1             | 192  | Short-BLUF         | 804 |
|     |                                                                     |      | C8PY74 | WP_007116296.1             | 191  | Short-BLUF         | 805 |
| 230 | <i>Enterobacter cloacae</i> subsp. <i>Cloacae</i> strain ATCC 13047 | P(y) | D5CBV1 | YP_003612864.1             | 406  | BLUF+ EAL          | 806 |
| 231 | <i>Enterobacter</i> sp. 638                                         | P(y) | A4WAH8 | YP_001176759.1             | 406  | BLUF+ EAL          | 807 |
|     |                                                                     |      | A4W9Q6 | YP_001176487.1/NP_415681.1 | 418  | BLUF+ EAL          | 808 |
| 232 | <i>Enterobacter aerogenes</i>                                       | P(y) |        | WP_020079328.1             | 403  | BLUF+EAL           | 809 |
|     | <i>Enterobacter aerogenes</i> ATCC 13048                            | P(y) | G0EBP4 | YP_004593064.1             | 403  | BLUF+EAL           | 810 |
|     | <i>Enterobacter aerogenes</i> EA1509E                               | P(y) | L8BJB1 | YP_007388638.1             | 403  | BLUF+EAL           | 811 |
| 233 | <i>Enterobacter asburiae</i> (strain LF7a)                          | P(y) | G2SAH3 | YP_004828302.1             | 406  | BLUF+EAL           | 812 |
|     |                                                                     |      | G2S426 | YP_004828705.1             | 404  | BLUF+EAL           | 813 |
| 234 | <i>Enterobacter cancerogenus</i> ATCC 35316                         | P(y) | D2ZBH9 | WP_006174898.1             | 406  | BLUF+ EAL          | 814 |
| 235 | <i>Enterobacter cloacae</i>                                         | P(y) |        | WP_023305984.1             | 406  | BLUF+EAL           | 815 |
|     |                                                                     |      |        | WP_023299928.1             | 406  | BLUF+EAL           | 816 |
|     |                                                                     |      |        | WP_023311325.1             | 406  | BLUF+EAL           | 817 |
|     |                                                                     |      |        | WP_023478840.1             | 410  | BLUF+EAL           | 818 |
|     |                                                                     |      |        | WP_017457087.1             | 407  | BLUF+EAL           | 819 |
|     |                                                                     |      |        | WP_017456801.1             | 406  | BLUF+EAL           | 820 |
| 236 | <i>Enterobacter cloacae</i> complex                                 | P(y) |        | WP_022647870.1             | 406  | BLUF+EAL           | 821 |
|     |                                                                     |      |        | WP_023292651.1             | 406  | BLUF+EAL           | 822 |
|     | <i>Enterobacter cloacae</i> EC_38VIM1                               | P(y) | S9ZFC8 | WP_021241106.1             | 406  | BLUF+EAL           | 823 |
|     | <i>Enterobacter cloacae</i> EcWSU1                                  | P(y) | G8LLE0 | YP_004951716.1             | 406  | BLUF+EAL           | 824 |
| 237 | <i>Enterobacter cloacae</i> subsp. <i>cloacae</i> ENHKU01           | P(y) | J7GAN8 | YP_006578373.1             | 406  | BLUF+EAL           | 825 |
|     | <i>Enterobacter cloacae</i> subsp. <i>cloacae</i> GS1               | P(y) | I4ZKI1 | WP_003857746.1             | 406  | BLUF+EAL           | 826 |
|     | <i>Enterobacter cloacae</i> subsp. <i>Cloacae</i> NCTC 9394         | P(y) | D6DT37 | YP_007845256.1             | 406  | BLUF+ EAL          | 827 |
| 238 | <i>Enterobacter cloacae</i> subsp. <i>dissolvens</i> SDM            | P(y) | I6SD99 | YP_006477315.1             | 406  | BLUF+EAL           | 828 |
| 239 | <i>Enterobacter hormaechei</i> ATCC 49162                           | P(y) | F5RSE2 | WP_006809041.1             | 406  | BLUF+EAL           | 829 |
| 240 | <i>Enterobacter mori</i>                                            | P(y) |        | WP_010430222.1             | 406  | BLUF+EAL           | 830 |
| 241 | <i>Enterobacter radicincitans</i> DSM 16656                         | P(y) | J1QQB0 | WP_007375061.1             | 413  | BLUF+EAL           | 831 |
| 242 | <i>Enterobacter sakazakii</i> ATCC BAA-894                          | P(y) | A7MRH4 | YP_001440495.1             | 406  | BLUF+ EAL          | 832 |
|     |                                                                     |      | A7MJM6 | YP_001437322.1             | 403  | BLUF+ EAL          | 833 |
| 243 | <i>Enterobacter</i> sp. Ag1                                         | P(y) | J0W5B8 | WP_008456677.1             | 396  | BLUF+EAL           | 834 |
|     | <i>Enterobacter</i> sp. MGH 14                                      | P(y) |        | WP_022650917.1             | 406  | BLUF+EAL           | 835 |
|     |                                                                     |      |        | WP_023335406.1             | 406  | BLUF+EAL           | 836 |
|     |                                                                     |      |        | WP_023327186.1             | 406  | BLUF+EAL           | 837 |
|     | <i>Enterobacter</i> sp. R4-368                                      | P(y) | R9VFU3 | YP_008106092.1             | 407  | BLUF+EAL           | 838 |
|     | <i>Enterobacter</i> sp. SST3                                        | P(y) | K4YIM7 | WP_008500633.1             | 406  | BLUF+EAL           | 839 |
| 244 | <i>Enterobacteriaceae bacterium</i> LSJC7                           | P(y) |        | WP_017372627.1             | 408  | BLUF+EAL           | 840 |
| 245 | <i>Enterovibrio calviensis</i>                                      | P(y) |        | WP_017010526.1             | 136  | Short-BLUF         | 841 |
| 246 | <i>Enterovibrio norvegicus</i>                                      | P(y) |        | WP_017003299.1             | 138  | Short-BLUF         | 842 |
|     |                                                                     |      |        | WP_016960395.1             | 138  | Short-BLUF         | 843 |
|     |                                                                     |      |        | WP_017004081.1             | 138  | Short-BLUF         | 844 |

|     |                                          |      |        |                            |     |            |     |
|-----|------------------------------------------|------|--------|----------------------------|-----|------------|-----|
|     |                                          |      |        | WP_016961429.1             | 136 | Short-BLUF | 845 |
| 247 | <i>Erwinia billingiae</i> (strain Eb661) | P(γ) | D8MSM3 | YP_003741677.1             | 405 | BLUF+EAL   | 846 |
| 248 | <i>Erwinia tasmaniensis</i> Et1/99       | P(γ) | B2VD82 | YP_001906720.1             | 399 | BLUF+ EAL  | 847 |
| 249 | <i>Escherichia coli</i>                  | P(γ) | E2QKT5 | YP_002556088.1/NP_753514.1 | 429 | BLUF+EAL   | 848 |
|     | <i>Escherichia coli</i>                  | P(γ) |        | WP_001391600.1             | 240 | BLUF+EAL   | 849 |
|     | <i>Escherichia coli</i>                  | P(γ) |        | WP_001468594.1             | 403 | BLUF+EAL   | 850 |
|     | <i>Escherichia coli</i>                  | P(γ) |        | WP_001361917.1             | 403 | BLUF+EAL   | 851 |
|     | <i>Escherichia coli</i>                  | P(γ) |        | WP_004015500.1             | 403 | BLUF+EAL   | 852 |
|     | <i>Escherichia coli</i>                  | P(γ) |        | WP_001743620.1             | 403 | BLUF+EAL   | 853 |
|     | <i>Escherichia coli</i>                  | P(γ) |        | WP_001740380.1             | 373 | BLUF+EAL   | 854 |
|     | <i>Escherichia coli</i>                  | P(γ) |        | WP_001718133.1             | 403 | BLUF+EAL   | 855 |
|     | <i>Escherichia coli</i>                  | P(γ) |        | WP_001698260.1             | 403 | BLUF+EAL   | 856 |
|     | <i>Escherichia coli</i>                  | P(γ) |        | WP_001691539.1             | 403 | BLUF+EAL   | 857 |
|     | <i>Escherichia coli</i>                  | P(γ) |        | WP_001695881.1             | 403 | BLUF+EAL   | 858 |
|     | <i>Escherichia coli</i>                  | P(γ) |        | WP_001687453.1             | 403 | BLUF+EAL   | 859 |
|     | <i>Escherichia coli</i>                  | P(γ) |        | WP_001465306.1             | 373 | BLUF+EAL   | 860 |
|     | <i>Escherichia coli</i>                  | P(γ) |        | WP_001355660.1             | 403 | BLUF+EAL   | 861 |
|     | <i>Escherichia coli</i>                  | P(γ) |        | WP_001295665.1             | 403 | BLUF+EAL   | 862 |
|     | <i>Escherichia coli</i>                  | P(γ) |        | WP_000958311.1             | 417 | BLUF+EAL   | 863 |
|     | <i>Escherichia coli</i>                  | P(γ) |        | WP_000958300.1             | 421 | BLUF+EAL   | 864 |
|     | <i>Escherichia coli</i>                  | P(γ) |        | WP_000958297.1             | 395 | BLUF+EAL   | 865 |
|     | <i>Escherichia coli</i>                  | P(γ) |        | WP_000958288.1             | 107 | Short-BLUF | 866 |
|     | <i>Escherichia coli</i>                  | P(γ) |        | WP_001620330.1             | 403 | BLUF+EAL   | 867 |
|     | <i>Escherichia coli</i>                  | P(γ) |        | WP_001612829.1             | 403 | BLUF+EAL   | 868 |
|     | <i>Escherichia coli</i>                  | P(γ) |        | WP_001607239.1             | 403 | BLUF+EAL   | 869 |
|     | <i>Escherichia coli</i>                  | P(γ) |        | WP_001602271.1             | 403 | BLUF+EAL   | 870 |
|     | <i>Escherichia coli</i>                  | P(γ) |        | WP_001599720.1             | 403 | BLUF+EAL   | 871 |
|     | <i>Escherichia coli</i>                  | P(γ) |        | WP_001595014.1             | 403 | BLUF+EAL   | 872 |
|     | <i>Escherichia coli</i>                  | P(γ) |        | WP_001578179.1             | 403 | BLUF+EAL   | 873 |
|     | <i>Escherichia coli</i>                  | P(γ) |        | WP_001569733.1             | 169 | Short-BLUF | 874 |
|     | <i>Escherichia coli</i>                  | P(γ) |        | WP_001568725.1             | 403 | BLUF+EAL   | 875 |
|     | <i>Escherichia coli</i>                  | P(γ) |        | WP_001555889.1             | 403 | BLUF+EAL   | 876 |
|     | <i>Escherichia coli</i>                  | P(γ) |        | WP_001554913.1             | 403 | BLUF+EAL   | 877 |
|     | <i>Escherichia coli</i>                  | P(γ) |        | WP_001552806.1             | 403 | BLUF+EAL   | 878 |
|     | <i>Escherichia coli</i>                  | P(γ) |        | WP_001544512.1             | 403 | BLUF+EAL   | 879 |
|     | <i>Escherichia coli</i>                  | P(γ) |        | WP_001538632.1             | 403 | BLUF+EAL   | 880 |
|     | <i>Escherichia coli</i>                  | P(γ) |        | WP_001536901.1             | 403 | BLUF+EAL   | 881 |
|     | <i>Escherichia coli</i>                  | P(γ) |        | WP_001522901.1             | 403 | BLUF+EAL   | 882 |
|     | <i>Escherichia coli</i>                  | P(γ) |        | WP_001524539.1             | 403 | BLUF+EAL   | 883 |
|     | <i>Escherichia coli</i>                  | P(γ) |        | WP_001446235.1             | 403 | BLUF+EAL   | 884 |
|     | <i>Escherichia coli</i>                  | P(γ) |        | WP_001445544.1             | 403 | BLUF+EAL   | 885 |
|     | <i>Escherichia coli</i>                  | P(γ) |        | WP_000958292.1             | 154 | Short-BLUF | 886 |
|     | <i>Escherichia coli</i>                  | P(γ) |        | WP_001374958.1             | 403 | BLUF+EAL   | 887 |
|     | <i>Escherichia coli</i>                  | P(γ) |        | WP_001370660.1             | 403 | BLUF+EAL   | 888 |
|     | <i>Escherichia coli</i>                  | P(γ) |        | WP_000243125.1             | 429 | BLUF+EAL   | 889 |
|     | <i>Escherichia coli</i>                  | P(γ) |        | WP_001437392.1             | 403 | BLUF+EAL   | 890 |
|     | <i>Escherichia coli</i>                  | P(γ) |        | WP_001433282.1             | 403 | BLUF+EAL   | 891 |
|     | <i>Escherichia coli</i>                  | P(γ) |        | WP_001429147.1             | 403 | BLUF+EAL   | 892 |
|     | <i>Escherichia coli</i>                  | P(γ) |        | WP_001419806.1             | 403 | BLUF+EAL   | 893 |
|     | <i>Escherichia coli</i>                  | P(γ) |        | WP_001386209.1             | 403 | BLUF+EAL   | 894 |
|     | <i>Escherichia coli</i>                  | P(γ) |        | WP_001362180.1             | 403 | BLUF+EAL   | 895 |
|     | <i>Escherichia coli</i>                  | P(γ) |        | WP_001366263.1             | 403 | BLUF+EAL   | 896 |
|     | <i>Escherichia coli</i>                  | P(γ) |        | WP_001358810.1             | 403 | BLUF+EAL   | 897 |

|  |                                                    |      |        |                            |     |            |     |
|--|----------------------------------------------------|------|--------|----------------------------|-----|------------|-----|
|  | <i>Escherichia coli</i>                            | P(y) |        | WP_001357463.1             | 403 | BLUF+EAL   | 898 |
|  | <i>Escherichia coli</i>                            | P(y) |        | WP_001317774.1             | 403 | BLUF+EAL   | 899 |
|  | <i>Escherichia coli</i>                            | P(y) |        | WP_001312754.1             | 403 | BLUF+EAL   | 900 |
|  | <i>Escherichia coli</i>                            | P(y) |        | WP_001348052.1             | 403 | BLUF+EAL   | 901 |
|  | <i>Escherichia coli</i>                            | P(y) |        | WP_001328999.1             | 403 | BLUF+EAL   | 902 |
|  | <i>Escherichia coli</i>                            | P(y) |        | WP_001324491.1             | 403 | BLUF+EAL   | 903 |
|  | <i>Escherichia coli</i>                            | P(y) |        | WP_001328624.1             | 403 | BLUF+EAL   | 904 |
|  | <i>Escherichia coli</i>                            | P(y) |        | WP_001308583.1             | 403 | BLUF+EAL   | 905 |
|  | <i>Escherichia coli</i>                            | P(y) |        | WP_001307726.1             | 403 | BLUF+EAL   | 906 |
|  | <i>Escherichia coli</i>                            | P(y) |        | WP_001463330.1             | 403 | BLUF+EAL   | 907 |
|  | <i>Escherichia coli</i>                            | P(y) |        | WP_023158058.1             | 405 | BLUF+EAL   | 908 |
|  | <i>Escherichia coli</i>                            | P(y) |        | WP_023146755.1             | 403 | BLUF+EAL   | 909 |
|  | <i>Escherichia coli</i>                            | P(y) |        | WP_022645540.1             | 403 | BLUF+EAL   | 910 |
|  | <i>Escherichia coli</i>                            | P(y) |        | WP_023356384.1             | 403 | BLUF+EAL   | 911 |
|  | <i>Escherichia coli</i>                            | P(y) |        | WP_023307905.1             | 403 | BLUF+EAL   | 912 |
|  | <i>Escherichia coli</i>                            | P(y) |        | WP_023146272.1             | 250 | BLUF       | 913 |
|  | <i>Escherichia coli</i>                            | P(y) |        | WP_023154785.1             | 408 | BLUF+EAL   | 914 |
|  | <i>Escherichia coli</i>                            | P(y) |        | WP_021559105.1             | 403 | BLUF+EAL   | 915 |
|  | <i>Escherichia coli</i>                            | P(y) |        | WP_021577349.1             | 403 | BLUF+EAL   | 916 |
|  | <i>Escherichia coli</i>                            | P(y) |        | WP_021576129.1             | 403 | BLUF+EAL   | 917 |
|  | <i>Escherichia coli</i>                            | P(y) |        | WP_021573430.1             | 403 | BLUF+EAL   | 918 |
|  | <i>Escherichia coli</i>                            | P(y) |        | WP_021565763.1             | 403 | BLUF+EAL   | 919 |
|  | <i>Escherichia coli</i>                            | P(y) |        | WP_021565021.1             | 403 | BLUF+EAL   | 920 |
|  | <i>Escherichia coli</i>                            | P(y) |        | WP_021556714.1             | 403 | BLUF+EAL   | 921 |
|  | <i>Escherichia coli</i>                            | P(y) |        | WP_021555271.1             | 403 | BLUF+EAL   | 922 |
|  | <i>Escherichia coli</i>                            | P(y) |        | WP_021545114.1             | 425 | BLUF+EAL   | 923 |
|  | <i>Escherichia coli</i>                            | P(y) |        | WP_021535563.1             | 342 | BLUF+EAL   | 924 |
|  | <i>Escherichia coli</i>                            | P(y) |        | WP_021529521.1             | 403 | BLUF+EAL   | 925 |
|  | <i>Escherichia coli</i>                            | P(y) |        | WP_021527398.1             | 400 | BLUF+EAL   | 926 |
|  | <i>Escherichia coli</i>                            | P(y) |        | WP_021524037.1             | 403 | BLUF+EAL   | 927 |
|  | <i>Escherichia coli</i>                            | P(y) |        | WP_020232864.1             | 403 | BLUF+EAL   | 928 |
|  | <i>Escherichia coli</i>                            | P(y) |        | WP_020232494.1             | 412 | BLUF+EAL   | 929 |
|  | <i>Escherichia coli</i>                            | P(y) |        | WP_020231333.1             | 403 | BLUF+EAL   | 930 |
|  | <i>Escherichia coli</i>                            | P(y) |        | WP_016236982.1             | 210 | Short-BLUF | 931 |
|  | <i>Escherichia coli</i>                            | P(y) |        | WP_016238372.1             | 403 | BLUF+EAL   | 932 |
|  | <i>Escherichia coli</i>                            | P(y) |        | WP_001661214.1             | 403 | BLUF+EAL   | 933 |
|  | <i>Escherichia coli</i>                            | P(y) |        | WP_001658104.1             | 403 | BLUF+EAL   | 934 |
|  | <i>Escherichia coli</i>                            | P(y) |        | WP_001654201.1             | 403 | BLUF+EAL   | 935 |
|  | <i>Escherichia coli</i>                            | P(y) |        | WP_001637794.1             | 403 | BLUF+EAL   | 936 |
|  | <i>Escherichia coli</i>                            | P(y) |        | WP_001596413.1             | 403 | BLUF+EAL   | 937 |
|  | <i>Escherichia coli</i>                            | P(y) |        | WP_001500094.1             | 286 | Short-BLUF | 938 |
|  | <i>Escherichia coli</i>                            | P(y) |        | WP_001498311.1             | 138 | Short-BLUF | 939 |
|  | <i>Escherichia coli</i>                            | P(y) |        | WP_001413030.1             | 403 | BLUF+EAL   | 940 |
|  | <i>Escherichia coli</i>                            | P(y) |        | WP_000958306.1             | 403 | BLUF+EAL   | 941 |
|  | <i>Escherichia coli</i> (protein YCGF)             | P(y) | Q2LD83 | NP_415681.1                | 403 | BLUF+ EAL  | 942 |
|  | <i>Escherichia coli</i> (strain 'clone D i14')     | P(y) | G7RPK6 | YP_006153556.1/NP_753514.1 | 429 | BLUF+EAL   | 943 |
|  | <i>Escherichia coli</i> (strain 'clone D i2')      | P(y) | G7R214 | YP_006148637.1/NP_753514.1 | 429 | BLUF+EAL   | 944 |
|  | <i>Escherichia coli</i> (strain ATCC 55124 / KO11) | P(y) | E8YDG2 | YP_005278355.1/NP_415681.1 | 403 | BLUF+EAL   | 945 |
|  | <i>Escherichia coli</i> (strain ATCC 9637 )        | P(y) | E0IV99 | YP_006123985.1/NP_415681.1 | 403 | BLUF+EAL   | 946 |
|  | <i>Escherichia coli</i> (strain K12)               | P(y) | P75990 | NP_415681.1                | 403 | BLUF+EAL   | 947 |

|                                               |      |        |                            |     |            |      |
|-----------------------------------------------|------|--------|----------------------------|-----|------------|------|
| <i>Escherichia coli</i> (strain UM146)        | P(γ) | E1RSI8 | YP_006111136.1/NP_415681.1 | 403 | BLUF+EAL   | 948  |
| <i>Escherichia coli</i> (strain UTI89 / UPEC) | P(γ) | Q1RCT6 | YP_540359.1                | 429 | BLUF+ EAL  | 949  |
| <i>Escherichia coli</i> 042                   | P(γ) |        | YP_006095522.1             | 429 | BLUF+EAL   | 950  |
| <i>Escherichia coli</i> 178850                | P(γ) | N4NL03 | WP_001373149.1             | 258 | Short-BLUF | 951  |
| <i>Escherichia coli</i> 179100                | P(γ) | N3IGZ9 | WP_001504199.1             | 371 | BLUF+EAL   | 952  |
| <i>Escherichia coli</i> 1827-70               | P(γ) | E2WUJ4 | WP_000958293.1             | 203 | Short-BLUF | 953  |
| <i>Escherichia coli</i> 2362-75               | P(γ) | E3XMI4 | WP_001339576.1             | 372 | BLUF+EAL   | 954  |
| <i>Escherichia coli</i> 2534-86               | P(γ) | G1Z313 | YP_008564297.1/NP_415681.1 | 403 | BLUF+EAL   | 955  |
| <i>Escherichia coli</i> 2722950               | P(γ) | N2FEM7 | WP_001737956.1             | 403 | BLUF+EAL   | 956  |
| <i>Escherichia coli</i> 2747800               | P(γ) | M9CTP4 | EMW77468.1/WP_001620704.1  | 373 | BLUF+EAL   | 957  |
| <i>Escherichia coli</i> 2756500               | P(γ) | M9CF46 | WP_001729927.1             | 403 | BLUF+EAL   | 958  |
| <i>Escherichia coli</i> 2848050               | P(γ) | M8ZHS3 | WP_001716462.1             | 403 | BLUF+EAL   | 959  |
| <i>Escherichia coli</i> 3003                  | P(γ) | I2YWE3 | EII85154.1/YP_002328824.1  | 403 | BLUF+EAL   | 960  |
| <i>Escherichia coli</i> 3030-1                | P(γ) | G1ZHP6 | EGW89164.1/NP_415681.1     | 403 | BLUF+EAL   | 961  |
| <i>Escherichia coli</i> 3431                  | P(γ) | E6B8L1 | NP_415681.1                | 403 | BLUF+EAL   | 962  |
| <i>Escherichia coli</i> 536                   | P(γ) |        | YP_669112.1                | 403 | BLUF+EAL   | 963  |
| <i>Escherichia coli</i> 55989                 | P(γ) |        | YP_002402341.1             | 403 | BLUF+EAL   | 964  |
| <i>Escherichia coli</i> 55989                 | P(γ) | B7LGR8 | NP_415681.1                | 403 | BLUF+ EAL  | 965  |
| <i>Escherichia coli</i> 83972                 | P(γ) | C2DS59 | NP_415681.1                | 403 | BLUF+ EAL  | 966  |
| <i>Escherichia coli</i> AA86                  | P(γ) | F5MCT4 | NP_415681.1                | 403 | BLUF+EAL   | 967  |
| <i>Escherichia coli</i> AI27                  | P(γ) | I1BDH2 | EIE56793.1/WP_000243121.1  | 429 | BLUF+EAL   | 968  |
| <i>Escherichia coli</i> ARS4.2123             | P(γ) | K3IWY5 | EKI29918.1/YP_002328824.1  | 403 | BLUF+EAL   | 969  |
| <i>Escherichia coli</i> ATCC 33849 / DSM 4235 | P(γ) | C9QYF1 | NP_415681.1                | 403 | BLUF+ EAL  | 970  |
| <i>Escherichia coli</i> ATCC 8739 / DSM 1576  | P(γ) | B1IUC7 | NP_415681.1                | 403 | BLUF+ EAL  | 971  |
| <i>Escherichia coli</i> B / BL21              | P(γ) | C5W442 | NP_415681.1                | 403 | BLUF+ EAL  | 972  |
| <i>Escherichia coli</i> B str. REL606         | P(γ) | C6UG31 | NP_415681.1                | 403 | BLUF+ EAL  | 973  |
| <i>Escherichia coli</i> B088                  | P(γ) | D6HVN5 | NP_415681.1                | 403 | BLUF+ EAL  | 974  |
| <i>Escherichia coli</i> B093                  | P(γ) | H1DQ46 | EHO01026.1/WP_001330601.1  | 403 | BLUF+EAL   | 975  |
| <i>Escherichia coli</i> B171                  | P(γ) | B3WRP4 | NP_415681.1                | 403 | BLUF+ EAL  | 976  |
| <i>Escherichia coli</i> B185                  | P(γ) | D6I668 | NP_415681.1                | 403 | BLUF+ EAL  | 977  |
| <i>Escherichia coli</i> B354                  | P(γ) | D6J9C2 | NP_415681.1                | 403 | BLUF+ EAL  | 978  |
| <i>Escherichia coli</i> B7A                   | P(γ) | B3HJB2 | NP_415681.1                | 403 | BLUF+ EAL  | 979  |
| <i>Escherichia coli</i> BL21(DE3)             | P(γ) | C6EGV1 | NP_415681.1                | 403 | BLUF+ EAL  | 980  |
| <i>Escherichia coli</i> BW2952                | P(γ) | C4ZS80 | NP_415681.1                | 403 | BLUF+ EAL  | 981  |
| <i>Escherichia coli</i> cloneA_i1             | P(γ) | G5KLP3 | NP_415681.1                | 403 | BLUF+EAL   | 982  |
| <i>Escherichia coli</i> DEC10A                | P(γ) | H5DHS1 | NP_415681.1                | 403 | BLUF+EAL   | 983  |
| <i>Escherichia coli</i> DEC10B                | P(γ) | H5E006 | NP_415681.1                | 403 | BLUF+EAL   | 984  |
| <i>Escherichia coli</i> DEC10C                | P(γ) | H5EGS7 | NP_415681.1                | 403 | BLUF+EAL   | 985  |
| <i>Escherichia coli</i> DEC10D                | P(γ) | H5EXJ1 | WP_001422010.1             | 261 | Short-BLUF | 986  |
| <i>Escherichia coli</i> DEC10E                | P(γ) | H5FCY8 | NP_415681.1                | 403 | BLUF+EAL   | 987  |
| <i>Escherichia coli</i> DEC11A                | P(γ) | H5GAH5 | NP_415681.1                | 403 | BLUF+EAL   | 988  |
| <i>Escherichia coli</i> DEC11B                | P(γ) | H5GRQ2 | NP_415681.1                | 403 | BLUF+EAL   | 989  |
| <i>Escherichia coli</i> DEC11C                | P(γ) | H5H5Q9 | NP_415681.1                | 403 | BLUF+EAL   | 990  |
| <i>Escherichia coli</i> DEC11D                | P(γ) | H5HNB4 | NP_415681.1                | 403 | BLUF+EAL   | 991  |
| <i>Escherichia coli</i> DEC11E                | P(γ) | H5I2D6 | NP_415681.1                | 403 | BLUF+EAL   | 992  |
| <i>Escherichia coli</i> DEC12A                | P(γ) | H5IHF5 | NP_415681.1                | 403 | BLUF+EAL   | 993  |
| <i>Escherichia coli</i> DEC12B                | P(γ) | H5IZB9 | NP_415681.1                | 403 | Short-BLUF | 994  |
| <i>Escherichia coli</i> DEC12C                | P(γ) | H5JGE4 | NP_415681.1                | 403 | BLUF+EAL   | 995  |
| <i>Escherichia coli</i> DEC12D                | P(γ) | H5JXD2 | NP_415681.1                | 403 | BLUF+EAL   | 996  |
| <i>Escherichia coli</i> DEC12E                | P(γ) | H5KCA3 | NP_415681.1                | 403 | BLUF+EAL   | 997  |
| <i>Escherichia coli</i> DEC13A                | P(γ) | H5KRY6 | NP_415681.1                | 403 | BLUF+EAL   | 998  |
| <i>Escherichia coli</i> DEC13B                | P(γ) | H5L5W5 | NP_415681.1                | 403 | BLUF+EAL   | 999  |
| <i>Escherichia coli</i> DEC13C                | P(γ) | H5LK42 | NP_415681.1                | 403 | BLUF+EAL   | 1000 |

|  |                                 |      |        |                           |     |            |      |
|--|---------------------------------|------|--------|---------------------------|-----|------------|------|
|  | <i>Escherichia coli</i> DEC13D  | P(y) | H5LZX0 | NP_415681.1               | 403 | BLUF+EAL   | 1001 |
|  | <i>Escherichia coli</i> DEC13E  | P(y) | H5MDZ1 | WP_001339576.1            | 381 | BLUF+EAL   | 1002 |
|  | <i>Escherichia coli</i> DEC14A  | P(y) | H5MTG4 | NP_415681.1               | 403 | BLUF+EAL   | 1003 |
|  | <i>Escherichia coli</i> DEC14B  | P(y) | H5N8E5 | NP_415681.1               | 403 | BLUF+EAL   | 1004 |
|  | <i>Escherichia coli</i> DEC14C  | P(y) | H5NN30 | WP_001379733.1            | 372 | BLUF+EAL   | 1005 |
|  | <i>Escherichia coli</i> DEC14D  | P(y) | H5P346 | NP_415681.1               | 403 | BLUF+EAL   | 1006 |
|  | <i>Escherichia coli</i> DEC15A  | P(y) | H5PIC2 | NP_415681.1               | 403 | BLUF+EAL   | 1007 |
|  | <i>Escherichia coli</i> DEC15B  | P(y) | H5PXP2 | NP_415681.1               | 403 | BLUF+EAL   | 1008 |
|  | <i>Escherichia coli</i> DEC15C  | P(y) | H5QCW6 | WP_001339576.1            | 372 | BLUF+EAL   | 1009 |
|  | <i>Escherichia coli</i> DEC15D  | P(y) | H5QSM1 | NP_415681.1               | 403 | BLUF+EAL   | 1010 |
|  | <i>Escherichia coli</i> DEC15E  | P(y) | H5R7T0 | NP_415681.1               | 403 | BLUF+EAL   | 1011 |
|  | <i>Escherichia coli</i> DEC1A   | P(y) | H4HV06 | WP_001339576.1            | 372 | BLUF+EAL   | 1012 |
|  | <i>Escherichia coli</i> DEC1B   | P(y) | H4I9V2 | NP_415681.1               | 403 | BLUF+EAL   | 1013 |
|  | <i>Escherichia coli</i> DEC1C   | P(y) | H4IQ81 | NP_415681.1               | 403 | BLUF+EAL   | 1014 |
|  | <i>Escherichia coli</i> DEC1D   | P(y) | H4J754 | NP_415681.1               | 403 | BLUF+EAL   | 1015 |
|  | <i>Escherichia coli</i> DEC1E   | P(y) | H4JKR0 | WP_001339576.1            | 372 | BLUF+EAL   | 1016 |
|  | <i>Escherichia coli</i> DEC2A   | P(y) | H4K1Y1 | WP_001410290.1            | 261 | Short-BLUF | 1017 |
|  | <i>Escherichia coli</i> DEC2B   | P(y) | H3KN36 | NP_415681.1               | 403 | BLUF+EAL   | 1018 |
|  | <i>Escherichia coli</i> DEC2C   | P(y) | H4KF73 | WP_001410290.1            | 261 | Short-BLUF | 1019 |
|  | <i>Escherichia coli</i> DEC2D   | P(y) | H4KZ77 | NP_415681.1               | 403 | BLUF+EAL   | 1020 |
|  | <i>Escherichia coli</i> DEC2E   | P(y) | H4LAN7 | NP_415681.1               | 403 | BLUF+EAL   | 1021 |
|  | <i>Escherichia coli</i> DEC3F   | P(y) | H4P354 | EHU91294.1/YP_006158540.1 | 403 | BLUF+EAL   | 1022 |
|  | <i>Escherichia coli</i> DEC5A   | P(y) | H4S987 | WP_001417812.1            | 44  | Short-BLUF | 1023 |
|  | <i>Escherichia coli</i> DEC5B   | P(y) | H4SPW0 | WP_001418500.1            | 75  | Short-BLUF | 1024 |
|  | <i>Escherichia coli</i> DEC5C   | P(y) | H4T6P3 | EHV41042.1/YP_006158540.1 | 403 | BLUF+EAL   | 1025 |
|  | <i>Escherichia coli</i> DEC5D   | P(y) | H4TM31 | WP_001419416.1            | 372 | BLUF+EAL   | 1026 |
|  | <i>Escherichia coli</i> DEC5E   | P(y) | H4U0V1 | NP_415681.1               | 403 | BLUF+EAL   | 1027 |
|  | <i>Escherichia coli</i> DEC6A   | P(y) | H4UHN0 | NP_415681.1               | 403 | BLUF+EAL   | 1028 |
|  | <i>Escherichia coli</i> DEC6B   | P(y) | H4UYZ3 | NP_415681.1               | 403 | BLUF+EAL   | 1029 |
|  | <i>Escherichia coli</i> DEC6C   | P(y) | H4VEK7 | WP_001422010.1            | 261 | Short-BLUF | 1030 |
|  | <i>Escherichia coli</i> DEC6D   | P(y) | H4VUU4 | NP_415681.1               | 403 | BLUF+EAL   | 1031 |
|  | <i>Escherichia coli</i> DEC6E   | P(y) | H4W991 | NP_415681.1               | 403 | BLUF+EAL   | 1032 |
|  | <i>Escherichia coli</i> DEC7A   | P(y) | H4WPY9 | WP_001423841.1            | 386 | BLUF+EAL   | 1033 |
|  | <i>Escherichia coli</i> DEC7B   | P(y) | H4X4A0 | NP_415681.1               | 403 | BLUF+EAL   | 1034 |
|  | <i>Escherichia coli</i> DEC7C   | P(y) | H4XJ12 | NP_415681.1               | 403 | BLUF+EAL   | 1035 |
|  | <i>Escherichia coli</i> DEC7D   | P(y) | H4XZW2 | NP_415681.1               | 403 | BLUF+EAL   | 1036 |
|  | <i>Escherichia coli</i> DEC7E   | P(y) | H4YEQ8 | WP_001425462.1            | 372 | BLUF+EAL   | 1037 |
|  | <i>Escherichia coli</i> DEC8A   | P(y) | H4YUP5 | WP_001425462.1            | 372 | BLUF+EAL   | 1038 |
|  | <i>Escherichia coli</i> DEC8B   | P(y) | H4ZC69 | WP_001425462.1            | 372 | BLUF+EAL   | 1039 |
|  | <i>Escherichia coli</i> DEC8C   | P(y) | H4ZUJ6 | NP_415681.1               | 403 | BLUF+EAL   | 1040 |
|  | <i>Escherichia coli</i> DEC8D   | P(y) | H5ABU3 | NP_415681.1               | 403 | BLUF+EAL   | 1041 |
|  | <i>Escherichia coli</i> DEC8E   | P(y) | H5ASV4 | NP_415681.1               | 403 | BLUF+EAL   | 1042 |
|  | <i>Escherichia coli</i> DEC9A   | P(y) | H5B8B5 | NP_415681.1               | 403 | BLUF+EAL   | 1043 |
|  | <i>Escherichia coli</i> DEC9B   | P(y) | H5BP36 | NP_415681.1               | 403 | BLUF+EAL   | 1044 |
|  | <i>Escherichia coli</i> DEC9C   | P(y) | H5C4S5 | WP_001425462.1            | 372 | BLUF+EAL   | 1045 |
|  | <i>Escherichia coli</i> DEC9D   | P(y) | H5CJX7 | NP_415681.1               | 403 | BLUF+EAL   | 1046 |
|  | <i>Escherichia coli</i> DEC9E   | P(y) | H5D173 | NP_415681.1               | 403 | BLUF+EAL   | 1047 |
|  | <i>Escherichia coli</i> DH10B   | P(y) | B1XA50 | NP_415681.1               | 403 | BLUF+ EAL  | 1048 |
|  | <i>Escherichia coli</i> E101    | P(y) | H1E3B0 | NP_415681.1               | 403 | BLUF+EAL   | 1049 |
|  | <i>Escherichia coli</i> E110019 | P(y) | B3ISH0 | WP_001299924.1            | 403 | BLUF+ EAL  | 1050 |
|  | <i>Escherichia coli</i> E1167   | P(y) | E9W5A9 | NP_415681.1               | 403 | BLUF+EAL   | 1051 |
|  | <i>Escherichia coli</i> E128010 | P(y) | E7HSJ0 | WP_000958298.1            | 417 | BLUF+EAL   | 1052 |
|  |                                 |      | E7HNP6 | NP_415681.1               | 403 | BLUF+EAL   | 1053 |



|                                            |      |        |                           |     |            |      |
|--------------------------------------------|------|--------|---------------------------|-----|------------|------|
| <i>Escherichia coli</i> E1520              | P(γ) | E9WDJ1 | WP_000958294.1            | 197 | Short-BLUF | 1054 |
| <i>Escherichia coli</i> E22                | P(γ) | B3ICE9 | NP_415681.1               | 403 | BLUF+ EAL  | 1055 |
| <i>Escherichia coli</i> E24377A            | P(γ) | A7ZKT0 | NP_415681.1               | 403 | BLUF+ EAL  | 1056 |
| <i>Escherichia coli</i> E482               | P(γ) | E9WRS0 | NP_415681.1               | 403 | BLUF+EAL   | 1057 |
| <i>Escherichia coli</i> EC4100B            | P(γ) | E7UMM1 | NP_415681.1               | 403 | BLUF+EAL   | 1058 |
| <i>Escherichia coli</i> ED1a               | P(γ) | B7MTT9 | NP_415681.1               | 403 | BLUF+ EAL  | 1059 |
| <i>Escherichia coli</i> EPECa14            | P(γ) | E7HK90 | NP_415681.1               | 403 | BLUF+EAL   | 1060 |
| <i>Escherichia coli</i> F11                | P(γ) | B3HNR5 | NP_415681.1               | 403 | BLUF+ EAL  | 1061 |
| <i>Escherichia coli</i> FVEC1302           | P(γ) | D7JMN5 | NP_415681.1               | 403 | BLUF+ EAL  | 1062 |
| <i>Escherichia coli</i> FVEC1412           | P(γ) | D6IP27 | NP_415681.1               | 403 | BLUF+ EAL  | 1063 |
| <i>Escherichia coli</i> G58-1              | P(γ) | G2B830 | WP_001379733.1            | 372 | BLUF+EAL   | 1064 |
| <i>Escherichia coli</i> H252               | P(γ) | E9VF91 | NP_415681.1               | 403 | BLUF+EAL   | 1065 |
| <i>Escherichia coli</i> H263               | P(γ) | E9VWR7 | NP_415681.1               | 403 | BLUF+EAL   | 1066 |
| <i>Escherichia coli</i> H299               | P(γ) | F4VTS9 | NP_415681.1               | 403 | BLUF+EAL   | 1067 |
| <i>Escherichia coli</i> H397               | P(γ) | H1EL63 | NP_415681.1               | 403 | BLUF+EAL   | 1068 |
| <i>Escherichia coli</i> H489               | P(γ) | E9XX0  | YP_002998973.1            | 403 | BLUF+EAL   | 1069 |
| <i>Escherichia coli</i> H494               | P(γ) | H1F5D1 | NP_415681.1               | 403 | BLUF+EAL   | 1070 |
| <i>Escherichia coli</i> H591               | P(γ) | F4VDH0 | NP_415681.1               | 403 | BLUF+EAL   | 1071 |
| <i>Escherichia coli</i> H736               | P(γ) | F4SGE2 | NP_415681.1               | 403 | BLUF+EAL   | 1072 |
| <i>Escherichia coli</i> HVH 24 (4-5985145) | P(γ) | T5U3L7 | EQN85704.1/YP_002328824.1 | 403 | BLUF+EAL   | 1073 |
| <i>Escherichia coli</i> HVH 87 (4-5977630) | P(γ) | T6LQJ1 | WP_021526772.1            | 403 | BLUF+EAL   | 1074 |
| <i>Escherichia coli</i> IA11               | P(γ) | B7LX75 | NP_415681.1               | 403 | BLUF+ EAL  | 1075 |
| <i>Escherichia coli</i> IA139              | P(γ) | B7NJ11 | YP_001744038.1            | 403 | BLUF+ EAL  | 1076 |
| <i>Escherichia coli</i> J53                | P(γ) | I0ZQT4 | EIE36605.1/YP_002292481.1 | 429 | BLUF+EAL   | 1077 |
| <i>Escherichia coli</i> JJ1886             | P(γ) |        | YP_008721327.1            | 403 | BLUF+EAL   | 1078 |
| <i>Escherichia coli</i> KTE104             | P(γ) | L3B881 | ELI09680.1/WP_001535319.1 | 403 | BLUF+EAL   | 1079 |
| <i>Escherichia coli</i> KTE143             | P(γ) | L3VHA7 | ELF21054.1/WP_001330601.1 | 403 | BLUF+EAL   | 1080 |
| <i>Escherichia coli</i> KTE147             | P(γ) | L4J3Y8 | WP_001469311.1            | 403 | BLUF+EAL   | 1081 |
| <i>Escherichia coli</i> KTE189             | P(γ) | L4U2B8 | WP_001535319.1            | 403 | BLUF+EAL   | 1082 |
| <i>Escherichia coli</i> KTE24              | P(γ) | S0WSF1 | WP_016234228.1            | 203 | Short-BLUF | 1083 |
| <i>Escherichia coli</i> KTE36              | P(γ) | S0Y267 | WP_001330601.1/EOU92452.1 | 403 | BLUF+EAL   | 1084 |
| <i>Escherichia coli</i> KTE37              | P(γ) | S0Y3B4 | WP_001330601.1/EOU92469.1 | 403 | BLUF+EAL   | 1085 |
| <i>Escherichia coli</i> KTE38              | P(γ) | S0Z706 | WP_001330601.1/EOV06473.1 | 403 | BLUF+EAL   | 1086 |
| <i>Escherichia coli</i> KTE69              | P(γ) | S1E0R2 | WP_001330601.1/EOV65043.1 | 403 | BLUF+EAL   | 1087 |
| <i>Escherichia coli</i> KTE70              | P(γ) | S1EQY3 | WP_001330601.1/EOV73843.1 | 403 | BLUF+EAL   | 1088 |
| <i>Escherichia coli</i> KTE74              | P(γ) | S1GJK9 | WP_001330601.1/EOV95898.1 | 403 | BLUF+EAL   | 1089 |
| <i>Escherichia coli</i> KTE75              | P(γ) | L3QAD1 | WP_001563125.1            | 403 | BLUF+EAL   | 1090 |
| <i>Escherichia coli</i> KTE98              | P(γ) | S1GV17 | EOV99135.1/WP_001330601.1 | 403 | BLUF+EAL   | 1091 |
| <i>Escherichia coli</i> M605               | P(γ) | F4SXD2 | NP_415681.1               | 403 | BLUF+EAL   | 1092 |
| <i>Escherichia coli</i> M718               | P(γ) | F4TD47 | NP_415681.1               | 403 | BLUF+EAL   | 1093 |
| <i>Escherichia coli</i> M863               | P(γ) | E9YT62 | NP_415681.1               | 403 | BLUF+EAL   | 1094 |
| <i>Escherichia coli</i> MS 107-1           | P(γ) | D8ELF2 | NP_415681.1               | 403 | BLUF+EAL   | 1095 |
| <i>Escherichia coli</i> MS 110-3           | P(γ) | E5ZQR8 | NP_415681.1               | 403 | BLUF+EAL   | 1096 |
| <i>Escherichia coli</i> MS 115-1           | P(γ) | D7Y2E5 | NP_415681.1               | 403 | BLUF+EAL   | 1097 |
| <i>Escherichia coli</i> MS 116-1           | P(γ) | D8AP06 | NP_415681.1               | 403 | BLUF+EAL   | 1098 |
| <i>Escherichia coli</i> MS 117-3           | P(γ) | E9TJ35 | NP_415681.1               | 403 | BLUF+EAL   | 1099 |
| <i>Escherichia coli</i> MS 119-7           | P(γ) | D8E362 | NP_415681.1               | 403 | BLUF+EAL   | 1100 |
| <i>Escherichia coli</i> MS 124-1           | P(γ) | E1JCK6 | NP_415681.1               | 403 | BLUF+EAL   | 1101 |
| <i>Escherichia coli</i> MS 145-7           | P(γ) | E1IU70 | NP_415681.1               | 403 | BLUF+EAL   | 1102 |
| <i>Escherichia coli</i> MS 146-1           | P(γ) | E1HU81 | WP_000958299.1            | 184 | Short-BLUF | 1103 |
| <i>Escherichia coli</i> MS 153-1           | P(γ) | E6AF94 | NP_415681.1               | 403 | BLUF+EAL   | 1104 |
| <i>Escherichia coli</i> MS 16-3            | P(γ) | E6AUN3 | NP_415681.1               | 403 | BLUF+EAL   | 1105 |
| <i>Escherichia coli</i> MS 175-1           | P(γ) | D8B0N6 | NP_415681.1               | 403 | BLUF+EAL   | 1106 |

|                                                             |      |        |                           |     |            |      |
|-------------------------------------------------------------|------|--------|---------------------------|-----|------------|------|
| <i>Escherichia coli</i> MS 182-1                            | P(y) | D7YEE0 | NP_415681.1               | 403 | BLUF+EAL   | 1107 |
| <i>Escherichia coli</i> MS 185-1                            | P(y) | D8C9B8 | NP_415681.1               | 403 | BLUF+EAL   | 1108 |
| <i>Escherichia coli</i> MS 187-1                            | P(y) | D7ZPK1 | NP_415681.1               | 403 | BLUF+EAL   | 1109 |
| <i>Escherichia coli</i> MS 196-1                            | P(y) | D8C5N7 | NP_415681.1               | 403 | BLUF+EAL   | 1110 |
| <i>Escherichia coli</i> MS 198-1                            | P(y) | D7X3D5 | NP_415681.1               | 403 | BLUF+EAL   | 1111 |
| <i>Escherichia coli</i> MS 200-1                            | P(y) | D8BP86 | NP_415681.1               | 403 | BLUF+EAL   | 1112 |
| <i>Escherichia coli</i> MS 21-1                             | P(y) | D8AF51 | WP_001330601.1            | 403 | BLUF+EAL   | 1113 |
| <i>Escherichia coli</i> MS 45-1                             | P(y) | D7YSY1 | NP_415681.1               | 403 | BLUF+EAL   | 1114 |
| <i>Escherichia coli</i> MS 57-2                             | P(y) | E9UH50 | NP_415681.1               | 403 | BLUF+EAL   | 1115 |
| <i>Escherichia coli</i> MS 60-1                             | P(y) | E9TPH6 | NP_415681.1               | 403 | BLUF+EAL   | 1116 |
| <i>Escherichia coli</i> MS 69-1                             | P(y) | D7ZI44 | NP_415681.1               | 403 | BLUF+EAL   | 1117 |
| <i>Escherichia coli</i> MS 78-1                             | P(y) | E1I486 | WP_001333133.1            | 381 | BLUF+EAL   | 1118 |
| <i>Escherichia coli</i> MS 79-10                            | P(y) | F8XHY8 | NP_415681.1               | 403 | BLUF+EAL   | 1119 |
| <i>Escherichia coli</i> MS 84-1                             | P(y) | D7XUY0 | NP_415681.1               | 403 | BLUF+EAL   | 1120 |
| <i>Escherichia coli</i> MS 85-1                             | P(y) | E6BLL3 | NP_415681.1               | 403 | BLUF+EAL   | 1121 |
| <i>Escherichia coli</i> NC101                               | P(y) | E0QZI5 | NP_415681.1               | 403 | BLUF+EAL   | 1122 |
| <i>Escherichia coli</i> O1:K1 / APEC                        | P(y) | A1AA89 | NP_415681.1               | 403 | BLUF+ EAL  | 1123 |
| <i>Escherichia coli</i> O103:H2 (strain 12009 / EHEC)       | P(y) | C8U6S6 | NP_415681.1               | 403 | BLUF+ EAL  | 1124 |
| <i>Escherichia coli</i> O104:H4 str. 01-09591               | P(y) | F9CGF7 | NP_415681.1               | 403 | BLUF+EAL   | 1125 |
| <i>Escherichia coli</i> O104:H4 str. 04-8351                | P(y) | G5U6U7 | NP_415681.1               | 403 | BLUF+EAL   | 1126 |
| <i>Escherichia coli</i> O104:H4 str. 09-7901                | P(y) | G5TW99 | NP_415681.1               | 403 | BLUF+EAL   | 1127 |
| <i>Escherichia coli</i> O104:H4 str. 11-3677                | P(y) | G5UQE0 | NP_415681.1               | 403 | BLUF+EAL   | 1128 |
| <i>Escherichia coli</i> O104:H4 str. 11-4404                | P(y) | G5VMA5 | NP_415681.1               | 403 | BLUF+EAL   | 1129 |
| <i>Escherichia coli</i> O104:H4 str. 11-4522                | P(y) | G5W1R3 | NP_415681.1               | 403 | BLUF+EAL   | 1130 |
| <i>Escherichia coli</i> O104:H4 str. 11-4623                | P(y) | G5W4F4 | NP_415681.1               | 403 | BLUF+EAL   | 1131 |
| <i>Escherichia coli</i> O104:H4 str. 11-4632 C1             | P(y) | G5WRS9 | NP_415681.1               | 403 | BLUF+EAL   | 1132 |
| <i>Escherichia coli</i> O104:H4 str. 11-4632 C2             | P(y) | G5X6D7 | NP_415681.1               | 403 | BLUF+EAL   | 1133 |
| <i>Escherichia coli</i> O104:H4 str. 11-4632 C3             | P(y) | G5XQC8 | NP_415681.1               | 403 | BLUF+EAL   | 1134 |
| <i>Escherichia coli</i> O104:H4 str. 11-4632 C4             | P(y) | G5XVF0 | NP_415681.1               | 403 | BLUF+EAL   | 1135 |
| <i>Escherichia coli</i> O104:H4 str. 11-4632 C5             | P(y) | G5YFA6 | NP_415681.1               | 403 | BLUF+EAL   | 1136 |
| <i>Escherichia coli</i> O104:H4 str. C227-11                | P(y) | F9HVJ8 | NP_415681.1               | 403 | BLUF+EAL   | 1137 |
| <i>Escherichia coli</i> O104:H4 str. C236-11                | P(y) | G5TEW1 | NP_415681.1               | 403 | BLUF+EAL   | 1138 |
| <i>Escherichia coli</i> O104:H4 str. LB226692               | P(y) | F8YEL3 | WP_001386733.1            | 372 | BLUF+EAL   | 1139 |
| <i>Escherichia coli</i> O111:H- (strain 11128 / EHEC)       | P(y) | C8UNSO | YP_003233971.1            | 403 | BLUF+ EAL  | 1140 |
| <i>Escherichia coli</i> O127:H6 (strain E2348/69 / EPEC)    | P(y) | B7UQ48 | CAS08828.1/YP_002328824.1 | 403 | BLUF+ EAL  | 1141 |
| <i>Escherichia coli</i> O150:H5 (strain SE15)               | P(y) | D2NHMO | NP_753514.1               | 429 | BLUF+ EAL  | 1142 |
| <i>Escherichia coli</i> O157:H- str. 493-89                 | P(y) | E8HST2 | EFX12369.1/YP_006158540.1 | 403 | BLUF+EAL   | 1143 |
| <i>Escherichia coli</i> O157:H- str. H 2687                 | P(y) | E8I6Q4 | EFX16781.1/YP_006158540.1 | 403 | BLUF+EAL   | 1144 |
| <i>Escherichia coli</i> O157:H43 str. T22                   | P(y) | H4FLQ5 | NP_415681.1               | 403 | BLUF+EAL   | 1145 |
| <i>Escherichia coli</i> O157:H7 str. G5101                  | P(y) | E8HDS1 | NP_415681.1               | 403 | BLUF+EAL   | 1146 |
| <i>Escherichia coli</i> O157:H7 str. LSU-61                 | P(y) | E8JDA4 | EFX31706.1/YP_006158540.1 | 403 | BLUF+EAL   | 1147 |
| <i>Escherichia coli</i> O17:K52:H18 (strain UMN026 / ExPEC) | P(y) | B7N3W4 | NP_415681.1               | 403 | BLUF+ EAL  | 1148 |
| <i>Escherichia coli</i> O18:K1:H7 (strain IHE3034 / ExPEC)  | P(y) | D5D0X4 | NP_415681.1               | 403 | BLUF+ EAL  | 1149 |
| <i>Escherichia coli</i> O25b:H4-ST131 str. EC958            | P(y) | N1N5N1 | WP_001295983.1            | 146 | Short-BLUF | 1150 |
| <i>Escherichia coli</i> O26:H11 (strain 11368 / EHEC)       | P(y) | C8TQH3 | NP_415681.1               | 403 | BLUF+ EAL  | 1151 |
| <i>Escherichia coli</i> O44:H18 (strain 042 / EAEC)         | P(y) | D3H1V7 | NP_753514.1               | 429 | BLUF+ EAL  | 1152 |
| <i>Escherichia coli</i> O55:H7 str. 3256-97                 | P(y) | E8IK46 | WP_000958309.1            | 106 | Short-BLUF | 1153 |
| <i>Escherichia coli</i> O55:H7 str. RM12579                 | P(y) | H6MEI0 | AEZ39985.1/YP_006158540.1 | 403 | BLUF+EAL   | 1154 |
| <i>Escherichia coli</i> O55:H7 str. USDA 5905               | P(y) | E8IY83 | EFX26987.1/YP_006158540.1 | 403 | BLUF+EAL   | 1155 |
| <i>Escherichia coli</i> O6                                  | P(y) | Q8FI42 | NP_753514.1               | 429 | BLUF+ EAL  | 1156 |
| <i>Escherichia coli</i> O6:K15:H31 536 / UPEC)              | P(y) | Q0TIL8 | NP_415681.1               | 403 | BLUF+ EAL  | 1157 |
| <i>Escherichia coli</i> O83:H1 (strain NRG 857C / AIEC)     | P(y) | E4P2E2 | ADR26615.1/YP_006119549.1 | 403 | BLUF+EAL   | 1158 |
| <i>Escherichia coli</i> O9:H4 / HS                          | P(y) | A7ZZ94 | NP_415681.1               | 403 | BLUF+ EAL  | 1159 |

|     |                                                     |         |        |                           |     |            |      |
|-----|-----------------------------------------------------|---------|--------|---------------------------|-----|------------|------|
|     | <i>Escherichia coli</i> OK1180                      | P(y)    | E7IPF0 | NP_415681.1               | 403 | BLUF+EAL   | 1160 |
|     | <i>Escherichia coli</i> OK1357                      | P(y)    | E7J2J6 | NP_415681.1               | 403 | BLUF+EAL   | 1161 |
|     | <i>Escherichia coli</i> OR:K5:H- (strain ABU 83972) | P(y)    | E1PJK6 | NP_753514.1               | 429 | BLUF+EAL   | 1162 |
|     | <i>Escherichia coli</i> P0301867.11                 | P(y)    | N3F7P9 | WP_001484419.1            | 403 | BLUF+EAL   | 1163 |
|     | <i>Escherichia coli</i> P0304816.15                 | P(y)    | N4BKD7 | ENF50218.1/WP_001620704.1 | 373 | BLUF+EAL   | 1164 |
|     | <i>Escherichia coli</i> P0305260.5                  | P(y)    | N4GMJ1 | WP_001648704.1            | 403 | BLUF+EAL   | 1165 |
|     | <i>Escherichia coli</i> PCN033                      | P(y)    | F7MVM7 | NP_415681.1               | 403 | BLUF+EAL   | 1166 |
|     | <i>Escherichia coli</i> RN587/1                     | P(y)    | E7JQF9 | EFZ72697.1/YP_002328824.1 | 403 | BLUF+EAL   | 1167 |
|     | <i>Escherichia coli</i> S88                         | P(y)    | B7MK58 | NP_415681.1               | 403 | BLUF+ EAL  | 1168 |
|     | <i>Escherichia coli</i> SCI-07                      | P(y)    | H8D7Y9 | NP_415681.1               | 403 | BLUF+EAL   | 1169 |
|     | <i>Escherichia coli</i> SE11                        | P(y)    | B6I9L9 | BAG76730.1/YP_002292481.1 | 429 | BLUF+ EAL  | 1170 |
|     | <i>Escherichia coli</i> SE15                        | P(y)    |        | YP_003349094.1            | 429 | BLUF+EAL   | 1171 |
|     | <i>Escherichia coli</i> SMS-3-5 / SECEC             | P(y)    | B1LI04 | YP_001744038.1            | 403 | BLUF+ EAL  | 1172 |
|     | <i>Escherichia coli</i> STEC_7v                     | P(y)    | F3LXX7 | WP_001360582.1            | 372 | BLUF+EAL   | 1173 |
|     | <i>Escherichia coli</i> STEC_94C                    | P(y)    | G1ZY43 | WP_001378868.1            | 261 | Short-BLUF | 1174 |
|     | <i>Escherichia coli</i> STEC_B2F1                   | P(y)    | G1Y830 | WP_000958302.1            | 371 | BLUF+EAL   | 1175 |
|     | <i>Escherichia coli</i> STEC_C165-02                | P(y)    | G1YNH8 | WP_001376825.1            | 372 | BLUF+EAL   | 1176 |
|     | <i>Escherichia coli</i> STEC_DG131-3                | P(y)    | G2AEF4 | WP_001379733.1            | 372 | BLUF+EAL   | 1177 |
|     | <i>Escherichia coli</i> STEC_EH250                  | P(y)    | G2ATD7 | WP_001379733.1            | 372 | BLUF+EAL   | 1178 |
|     | <i>Escherichia coli</i> STEC_H.1.8                  | P(y)    | G2BMD5 | WP_001382007.1            | 230 | Short-BLUF | 1179 |
|     | <i>Escherichia coli</i> STEC_MHI813                 | P(y)    | G2C2Z3 | WP_001383099.1            | 372 | BLUF+EAL   | 1180 |
|     | <i>Escherichia coli</i> STEC_S1191                  | P(y)    | G2CJ51 | NP_415681.1               | 403 | BLUF+EAL   | 1181 |
|     | <i>Escherichia coli</i> TA124                       | P(y)    | H1FGR3 | WP_001389598.1            | 403 | BLUF+EAL   | 1182 |
|     | <i>Escherichia coli</i> TA143                       | P(y)    | F4U625 | NP_415681.1               | 403 | BLUF+EAL   | 1183 |
|     | <i>Escherichia coli</i> TA206                       | P(y)    | F4TT04 | WP_000958310.1            | 176 | Short-BLUF | 1184 |
|     | <i>Escherichia coli</i> TA271                       | P(y)    | F4ULK8 | NP_415681.1               | 403 | BLUF+EAL   | 1185 |
|     | <i>Escherichia coli</i> TW10509                     | P(y)    | E9XMH9 | WP_000958307.1            | 403 | BLUF+EAL   | 1186 |
|     | <i>Escherichia coli</i> TX1999                      | P(y)    | G2CYS1 | NP_415681.1               | 403 | BLUF+EAL   | 1187 |
|     | <i>Escherichia coli</i> UMN026                      | P(y)    |        | YP_002412195.1            | 403 | BLUF+EAL   | 1188 |
|     | <i>Escherichia coli</i> UMN18                       | P(y)    | G0FBW4 | NP_415681.1               | 403 | BLUF+EAL   | 1189 |
|     | <i>Escherichia coli</i> UMNK88                      | P(y)    | F4M2X4 | NP_415681.1               | 403 | BLUF+EAL   | 1190 |
|     | <i>Escherichia coli</i> WV_060327                   | P(y)    | E7U6E5 | NP_415681.1               | 403 | BLUF+EAL   | 1191 |
|     | <i>Escherichia coli</i> XH001                       | P(y)    | G2F1Z8 | NP_415681.1               | 403 | BLUF+EAL   | 1192 |
|     | <i>Escherichia coli</i> XH140A                      | P(y)    | F9QYE5 | NP_415681.1               |     | BLUF+EAL   | 1193 |
| 250 | <i>Escherichia hermannii</i> NBRC 105704            | P(y)    | H5V3N0 | WP_002436603.1            |     | BLUF+EAL   | 1194 |
|     |                                                     |         | H5UZV4 | WP_002434328.1            | 406 | BLUF+EAL   | 1195 |
| 251 | <i>Escherichia</i> sp. 3_2_53FAA                    | P(y)    | C1HJN0 | NP_753514.1               | 429 | BLUF+ EAL  | 1196 |
| 252 | <i>Frateuria aurantia</i> ATCC 33424                | P(y)    | H8L2L8 | YP_005377167.1            | 424 | BLUF+EAL   | 1197 |
|     |                                                     |         | H8L2L7 | YP_005377166.1            | 439 | BLUF+EAL   | 1198 |
| 253 | <i>gamma proteobacterium</i> BDW918                 | P(y)    | I2JPC2 | WP_008246638.1            | 138 | Short-BLUF | 1199 |
| 254 | <i>gamma proteobacterium</i> HIMB55                 | P(y)U   | H3NRI2 | WP_009470377.1            | 146 | Short-BLUF | 1200 |
| 255 | <i>gamma proteobacterium</i> IMCC1989               | P(y)    | F3LF24 | WP_009669485.1            | 144 | Short-BLUF | 1201 |
| 256 | <i>gamma proteobacterium</i> IMCC2047               | P(y)U   | F3KDB1 | WP_008530288.1            | 150 | Short-BLUF | 1202 |
| 257 | <i>gamma proteobacterium</i> IMCC2047               | P(y)Unc |        | EGG99643.1                | 150 | Short-BLUF | 1203 |
| 258 | <i>gamma proteobacterium</i> IMCC3088               | P(y)U   | F3KYX3 | WP_009574606.1            | 145 | Short-BLUF | 1204 |
| 259 | <i>gamma proteobacterium</i> NOR5-3                 | P(y)U   | B8KEY4 | WP_009021778.1            | 161 | Short-BLUF | 1205 |
| 260 | <i>gamma proteobacterium</i> NOR5-3                 | P(y)U   | B8KL1  | WP_009023838.1            | 157 | Short-BLUF | 1206 |
| 261 | <i>gamma proteobacterium</i> NOR5-3                 | P(y)U   | B8KT47 | WP_009021276.1            | 149 | Short-BLUF | 1207 |
| 262 | <i>gamma proteobacterium</i> WG36                   | P(y)    |        | WP_017494424.1            | 405 | BLUF+EAL   | 1208 |
| 263 | <i>Gayadomonas joobiniege</i>                       | P(y)    |        | WP_017445646.1            | 152 | Short-BLUF | 1209 |
| 264 | <i>Gilvimirinus chinensis</i>                       | P(y)    |        | WP_020208650.1            | 152 | Short-BLUF | 1210 |
| 265 | <i>Glaciecola arctica</i> BSs20135                  | P(y)    | K6Y178 | WP_007616696.1            | 136 | Short-BLUF | 1211 |
|     |                                                     |         | K6Y8U9 | WP_007622166.1            | 134 | Short-BLUF | 1212 |

|     |                                             |      |        |                           |     |            |      |
|-----|---------------------------------------------|------|--------|---------------------------|-----|------------|------|
| 266 | <i>Glaciecola mesophila</i> KMM 241         | P(γ) | K6XXC1 | WP_006993405.1            | 133 | Short-BLUF | 1213 |
| 267 | <i>Glaciecola nitratireducens</i> JCM 12485 | P(γ) | G4QF34 | YP_004870371.1            | 147 | Short-BLUF | 1214 |
| 268 | <i>Grimontia hollisae</i> CIP 101886        | P(γ) | D0IB49 | WP_005505863.1            | 136 | Short-BLUF | 1215 |
| 269 | <i>Grimontia</i> sp. AK16                   | P(γ) | R1IQH4 | WP_002541795.1            | 136 | Short-BLUF | 1216 |
| 270 | <i>Halothiobacillus neapolitanus</i> c2     | P(γ) | D0L046 | YP_003263116.1            | 143 | Short-BLUF | 1217 |
| 271 | <i>Kangiella aquimarina</i>                 | P(γ) |        | WP_018624129.1            | 143 | Short-BLUF | 1218 |
| 272 | <i>Kangiella koreensis</i> DSM 16069        | P(γ) | C7R790 | YP_003147314.1            | 143 | Short-BLUF | 1219 |
| 273 | <i>Klebsiella oxytoca</i>                   | P(γ) |        | WP_016810135.1            | 407 | BLUF+EAL   | 1220 |
|     | <i>Klebsiella oxytoca</i>                   | P(γ) |        | WP_023320606.1            | 407 | BLUF+EAL   | 1221 |
|     | <i>Klebsiella oxytoca</i>                   | P(γ) |        | WP_017145797.1            | 409 | BLUF+EAL   | 1222 |
|     | <i>Klebsiella oxytoca</i>                   | P(γ) |        | WP_016808785.1            | 409 | BLUF+EAL   | 1223 |
|     | <i>Klebsiella oxytoca</i> 10-5242           | P(γ) | H3L520 | EHT02598.1/WP_004849017.1 | 407 | BLUF+EAL   | 1224 |
|     | <i>Klebsiella oxytoca</i> 10-5242           | P(γ) | H3L8A3 | EHS99926.1/WP_004851219.1 | 408 | BLUF+EAL   | 1225 |
|     | <i>Klebsiella oxytoca</i> 10-5243           | P(γ) | H3LKF5 | WP_004100387.1            | 407 | BLUF+EAL   | 1226 |
|     | <i>Klebsiella oxytoca</i> 10-5243           | P(γ) | H3LPD4 | WP_004102968.1            | 390 | BLUF+EAL   | 1227 |
|     | <i>Klebsiella oxytoca</i> 10-5243           | P(γ) | H3LNU7 | EHS97649.1/WP_004102385.1 | 409 | BLUF+EAL   | 1228 |
|     | <i>Klebsiella oxytoca</i> 10-5245           | P(γ) | H3M2I6 | WP_004111512.1            | 407 | BLUF+EAL   | 1229 |
|     | <i>Klebsiella oxytoca</i> 10-5245           | P(γ) | H3M586 | EHS97119.1/WP_004113307.1 | 409 | BLUF+EAL   | 1230 |
|     | <i>Klebsiella oxytoca</i> 10-5250           | P(γ) | H3N9V3 | WP_004130625.1            | 407 | BLUF+EAL   | 1231 |
|     | <i>Klebsiella oxytoca</i> 10-5250           | P(γ) | H3MWL6 | EHT14305.1/WP_004119787.1 | 408 | BLUF+EAL   | 1232 |
|     | <i>Klebsiella oxytoca</i> ATCC 8724         | P(γ) | G8WFT1 | YP_005018934.1            | 407 | BLUF+EAL   | 1233 |
|     | <i>Klebsiella oxytoca</i> ATCC 8724         | P(γ) | G8WGX1 | AEX05998.1/YP_005020237.1 | 402 | BLUF+EAL   | 1234 |
|     | <i>Klebsiella oxytoca</i> E718              | P(γ) | I6W311 | YP_006497531.1            | 407 | BLUF+EAL   | 1235 |
|     | <i>Klebsiella oxytoca</i> M5al              | P(γ) | K6JLZ8 | WP_004134964.1            | 407 | BLUF+EAL   | 1236 |
|     | <i>Klebsiella oxytoca</i> M5al              | P(γ) | K6JK93 | WP_004136285.1            | 405 | BLUF+EAL   | 1237 |
| 274 | <i>Klebsiella pneumoniae</i>                | P(γ) | R4YC97 | CC178036.1                | 403 | BLUF+EAL   | 1238 |
|     | <i>Klebsiella pneumoniae</i>                | P(γ) | G0GUP8 | YP_005953822.1            | 403 | BLUF+EAL   | 1239 |
|     | <i>Klebsiella pneumoniae</i>                | P(γ) | G0GPP1 | YP_005954630.1            | 405 | BLUF+EAL   | 1240 |
|     | <i>Klebsiella pneumoniae</i>                | P(γ) |        | WP_017899618.1            | 403 | BLUF+EAL   | 1241 |
|     | <i>Klebsiella pneumoniae</i>                | P(γ) |        | WP_021314053.1            | 403 | BLUF+EAL   | 1242 |
|     | <i>Klebsiella pneumoniae</i>                | P(γ) |        | WP_020802923.1            | 405 | BLUF+EAL   | 1243 |
|     | <i>Klebsiella pneumoniae</i>                | P(γ) |        | WP_017879970.1            | 405 | BLUF+EAL   | 1244 |
|     | <i>Klebsiella pneumoniae</i>                | P(γ) |        | WP_021314208.1            | 405 | BLUF+EAL   | 1245 |
|     | <i>Klebsiella pneumoniae</i>                | P(γ) |        | WP_017900341.1            | 405 | BLUF+EAL   | 1246 |
|     | <i>Klebsiella pneumoniae</i>                | P(γ) |        | WP_023288895.1            | 403 | BLUF+EAL   | 1247 |
|     | <i>Klebsiella pneumoniae</i>                | P(γ) |        | WP_023287389.1            | 403 | BLUF+EAL   | 1248 |
|     | <i>Klebsiella pneumoniae</i>                | P(γ) |        | WP_023302151.1            | 403 | BLUF+EAL   | 1249 |
|     | <i>Klebsiella pneumoniae</i>                | P(γ) |        | WP_023283451.1            | 410 | BLUF+EAL   | 1250 |
|     | <i>Klebsiella pneumoniae</i>                | P(γ) |        | WP_023297241.1            | 403 | BLUF+EAL   | 1251 |
|     | <i>Klebsiella pneumoniae</i>                | P(γ) |        | WP_023342830.1            | 405 | BLUF+EAL   | 1252 |
|     | <i>Klebsiella pneumoniae</i>                | P(γ) |        | WP_023341511.1            | 405 | BLUF+EAL   | 1253 |
|     | <i>Klebsiella pneumoniae</i>                | P(γ) |        | WP_023327961.1            | 405 | BLUF+EAL   | 1254 |
|     | <i>Klebsiella pneumoniae</i>                | P(γ) |        | WP_023322569.1            | 405 | BLUF+EAL   | 1255 |
|     | <i>Klebsiella pneumoniae</i>                | P(γ) |        | WP_023316827.1            | 405 | BLUF+EAL   | 1256 |
|     | <i>Klebsiella pneumoniae</i>                | P(γ) |        | WP_023301958.1            | 405 | BLUF+EAL   | 1257 |
|     | <i>Klebsiella pneumoniae</i>                | P(γ) |        | WP_023286396.1            | 405 | BLUF+EAL   | 1258 |
|     | <i>Klebsiella pneumoniae</i>                | P(γ) |        | WP_023318182.1            | 405 | BLUF+EAL   | 1259 |
|     | <i>Klebsiella pneumoniae</i>                | P(γ) |        | WP_023340100.1            | 405 | BLUF+EAL   | 1260 |
|     | <i>Klebsiella pneumoniae</i> 342            | P(γ) | B5XQZ5 | YP_002238639.1            | 405 | BLUF+ EAL  | 1261 |
|     | <i>Klebsiella pneumoniae</i> 342            | P(γ) | B5XZ96 | ACI08361.1/YP_002239613.1 | 403 | BLUF+ EAL  | 1262 |
|     | <i>Klebsiella pneumoniae</i> 700603         | P(γ) | M7PV04 | WP_004886055.1            | 403 | BLUF+EAL   | 1263 |
|     | <i>Klebsiella pneumoniae</i> 700603         | P(γ) | M7PCJ7 | WP_004206010.1            | 405 | BLUF+EAL   | 1264 |
|     | <i>Klebsiella pneumoniae</i> ATCC BAA-1705  | P(γ) | M7QLZ6 | EMR23689.1/YP_005226813.1 | 405 | BLUF+EAL   | 1265 |

|     |                                                                   |      |        |                               |     |            |      |
|-----|-------------------------------------------------------------------|------|--------|-------------------------------|-----|------------|------|
|     | <i>Klebsiella pneumoniae</i> ATCC BAA-2146                        | P(γ) | M7QLK1 | EMR23559.1/YP_005226813.1     | 405 | BLUF+EAL   | 1266 |
|     | <i>Klebsiella pneumoniae</i> CG43                                 | P(γ) |        | YP_008659363.1                | 403 | BLUF+EAL   | 1267 |
|     | <i>Klebsiella pneumoniae</i> DMC0799                              | P(γ) | S7BC21 | EPO21704.1/YP_001334448.1     | 403 | BLUF+EAL   | 1268 |
|     | <i>Klebsiella pneumoniae</i> hvKP1                                | P(γ) | M2AJV2 | EMB10239.1/YP_001334448.1     | 403 | BLUF+EAL   | 1269 |
|     | <i>Klebsiella pneumoniae</i> hvKP1                                | P(γ) | M2ATT4 | EMB12948.1/YP_001335259.1     | 405 | BLUF+EAL   | 1270 |
|     | <i>Klebsiella pneumoniae</i> JHCK1                                | P(γ) | M3V4M6 | YP_001334448.1                | 403 | BLUF+EAL   | 1271 |
|     | <i>Klebsiella pneumoniae</i> JHCK1                                | P(γ) | M3SU26 | EMH92743.1/YP_001335259.1     | 405 | BLUF+EAL   | 1272 |
|     | <i>Klebsiella pneumoniae</i> KP-11                                | P(γ) | S2CCS2 | EOZ72815.1/YP_001334448.1     | 403 | BLUF+EAL   | 1273 |
|     | <i>Klebsiella pneumoniae</i> KP-7                                 | P(γ) | S1TBD0 | EOY66353.1/YP_001334448.1     | 403 | BLUF+EAL   | 1274 |
|     | <i>Klebsiella pneumoniae</i> NTUH-K2044                           | P(γ) | C4X832 | YP_002919357.1                | 422 | BLUF+ EAL  | 1275 |
|     | <i>Klebsiella pneumoniae</i> NTUH-K2044                           | P(γ) | C4X5Q9 | YP_002918534.1                | 403 | BLUF+ EAL  | 1276 |
|     | <i>Klebsiella pneumoniae</i> RYC492                               | P(γ) | M5QAQ1 | WP_004893335.1                | 403 | BLUF+EAL   | 1277 |
|     | <i>Klebsiella pneumoniae</i> RYC492                               | P(γ) | M5Q7X9 | EMH98112.1/YP_006636433.1     | 405 | BLUF+EAL   | 1278 |
| 275 | <i>Klebsiella pneumoniae</i> subsp. <i>pneumoniae</i> 1084        | P(γ) | K4HAP6 | YP_006637253.1/YP_001334448.1 | 403 | BLUF+EAL   | 1279 |
|     | <i>Klebsiella pneumoniae</i> subsp. <i>pneumoniae</i> 1084        | P(γ) | K4H3X6 | YP_006636433.1                | 405 | BLUF+EAL   | 1280 |
|     | <i>Klebsiella pneumoniae</i> subsp. <i>pneumoniae</i> ATCC 700721 | P(γ) | A6T8V8 | ABR77029.1/YP_001335259.1     | 405 | BLUF+ EAL  | 1281 |
|     | <i>Klebsiella pneumoniae</i> subsp. <i>pneumoniae</i> ATCC 700721 | P(γ) | A6T6J7 | ABR76218.1/YP_001334448.1     | 403 | BLUF+ EAL  | 1282 |
|     | <i>Klebsiella pneumoniae</i> subsp. <i>pneumoniae</i> DSM 30104   | P(γ) | J2X7Q0 | EJK91023.1/YP_001335259.1     | 405 | BLUF+EAL   | 1283 |
|     | <i>Klebsiella pneumoniae</i> subsp. <i>pneumoniae</i> Ecl8        | P(γ) | K4UDV3 | CCN29648.1/YP_001335259.1     | 405 | BLUF+EAL   | 1284 |
|     | <i>Klebsiella pneumoniae</i> subsp. <i>pneumoniae</i> HS11286     | P(γ) | G8W5H8 | YP_005225909.1                | 403 | BLUF+EAL   | 1285 |
|     | <i>Klebsiella pneumoniae</i> subsp. <i>pneumoniae</i> HS11286     | P(γ) | G8W1U2 | AEW61211.1/YP_005226813.1     | 405 | BLUF+EAL   | 1286 |
|     | <i>Klebsiella pneumoniae</i> subsp. <i>pneumoniae</i> KpMDU1      | P(γ) | N9UNX0 | WP_002895176.1                | 103 | Short-BLUF | 1287 |
|     | <i>Klebsiella pneumoniae</i> subsp. <i>pneumoniae</i> KpMDU1      | P(γ) | N9UB22 | ENY57642.1/YP_005226813.1     | 405 | BLUF+EAL   | 1288 |
|     | <i>Klebsiella pneumoniae</i> subsp. <i>pneumoniae</i> KPNIH1      | P(γ) | J2LLB7 | EJJ33749.1/YP_005226813.1     | 405 | BLUF+EAL   | 1289 |
|     | <i>Klebsiella pneumoniae</i> subsp. <i>pneumoniae</i> KPNIH10     | P(γ) | J2Q500 | EJJ73872.1/YP_005226813.1     | 405 | BLUF+EAL   | 1290 |
|     | <i>Klebsiella pneumoniae</i> subsp. <i>pneumoniae</i> KPNIH11     | P(γ) | J1Y1B0 | EJJ83951.1/YP_005226813.1     | 405 | BLUF+EAL   | 1291 |
|     | <i>Klebsiella pneumoniae</i> subsp. <i>pneumoniae</i> KPNIH12     | P(γ) | J2R422 | EJJ85679.1/YP_005226813.1     | 405 | BLUF+EAL   | 1292 |
|     | <i>Klebsiella pneumoniae</i> subsp. <i>pneumoniae</i> KPNIH14     | P(γ) | J1XPZ0 | EJJ86178.1/YP_005226813.1     | 405 | BLUF+EAL   | 1293 |
|     | <i>Klebsiella pneumoniae</i> subsp. <i>pneumoniae</i> KPNIH16     | P(γ) | J2SEY9 | EJK01005.1/YP_005226813.1     | 405 | BLUF+EAL   | 1294 |
|     | <i>Klebsiella pneumoniae</i> subsp. <i>pneumoniae</i> KPNIH17     | P(γ) | J1ZJT8 | EJK00872.1/YP_005226813.1     | 405 | BLUF+EAL   | 1295 |
|     | <i>Klebsiella pneumoniae</i> subsp. <i>pneumoniae</i> KPNIH18     | P(γ) | J1ZTT7 | EJK09919.1/YP_005226813.1     | 405 | BLUF+EAL   | 1296 |
|     | <i>Klebsiella pneumoniae</i> subsp. <i>pneumoniae</i> KPNIH19     | P(γ) | J2TV30 | EJK17135.1/YP_005226813.1     | 405 | BLUF+EAL   | 1297 |
|     | <i>Klebsiella pneumoniae</i> subsp. <i>pneumoniae</i> KPNIH2      | P(γ) | J2BEA0 | EJJ34470.1/YP_005226813.1     | 405 | BLUF+EAL   | 1298 |
|     | <i>Klebsiella pneumoniae</i> subsp. <i>pneumoniae</i> KPNIH20     | P(γ) | J2TVY5 | EJK17435.1/YP_005226813.1     | 405 | BLUF+EAL   | 1299 |
|     | <i>Klebsiella pneumoniae</i> subsp. <i>pneumoniae</i> KPNIH21     | P(γ) | J2JB02 | EJK27376.1/YP_005226813.1     | 405 | BLUF+EAL   | 1300 |
|     | <i>Klebsiella pneumoniae</i> subsp. <i>pneumoniae</i> KPNIH22     | P(γ) | J2VAC5 | EJK33703.1/YP_005226813.1     | 405 | BLUF+EAL   | 1301 |
|     | <i>Klebsiella pneumoniae</i> subsp. <i>pneumoniae</i> KPNIH23     | P(γ) | J2BVP2 | EJK34244.1/YP_005226813.1     | 405 | BLUF+EAL   | 1302 |
|     | <i>Klebsiella pneumoniae</i> subsp. <i>pneumoniae</i> KPNIH4      | P(γ) | J2CGH8 | EJJ47550.1/YP_005226813.1     | 405 | BLUF+EAL   | 1303 |
|     | <i>Klebsiella pneumoniae</i> subsp. <i>pneumoniae</i> KPNIH5      | P(γ) | J1V7T6 | EJJ51671.1/YP_005226813.1     | 405 | BLUF+EAL   | 1304 |
|     | <i>Klebsiella pneumoniae</i> subsp. <i>pneumoniae</i> KPNIH6      | P(γ) | J1VSE1 | EJJ58196.1/YP_005226813.1     | 405 | BLUF+EAL   | 1305 |
|     | <i>Klebsiella pneumoniae</i> subsp. <i>pneumoniae</i> KPNIH7      | P(γ) | J1VSD5 | EJJ63833.1/YP_005226813.1     | 405 | BLUF+EAL   | 1306 |
|     | <i>Klebsiella pneumoniae</i> subsp. <i>pneumoniae</i> KPNIH8      | P(γ) | J1WBB9 | EJJ70043.1/YP_005226813.1     | 405 | BLUF+EAL   | 1307 |
|     | <i>Klebsiella pneumoniae</i> subsp. <i>pneumoniae</i> KPNIH9      | P(γ) | J1WDS7 | EJJ70888.1/YP_005226813.1     | 405 | BLUF+EAL   | 1308 |
|     | <i>Klebsiella pneumoniae</i> subsp. <i>pneumoniae</i> KpQ3        | P(γ) | M5GMC5 | EKF78982.1/YP_001335259.1     | 405 | BLUF+EAL   | 1309 |
|     | <i>Klebsiella pneumoniae</i> subsp. <i>pneumoniae</i> ST258-K26BO | P(γ) | K4RS57 | CCM80630.1/YP_005226813.1     | 405 | BLUF+EAL   | 1310 |
|     | <i>Klebsiella pneumoniae</i> subsp. <i>pneumoniae</i> ST258-K28BO | P(γ) | K4SA97 | CCM86960.1/YP_005226813.1     | 405 | BLUF+EAL   | 1311 |
|     | <i>Klebsiella pneumoniae</i> subsp. <i>pneumoniae</i> ST512-K30BO | P(γ) | K4SX07 | CCM95184.1/YP_005226813.1     | 405 | BLUF+EAL   | 1312 |
|     | <i>Klebsiella pneumoniae</i> subsp. <i>pneumoniae</i> WGLW1       | P(γ) | K1NF33 | EKB66739.1/YP_001334448.1     | 403 | BLUF+EAL   | 1313 |
|     |                                                                   |      | K1M9Z4 | EKB66010.1/YP_001335259.1     | 405 | BLUF+EAL   | 1314 |
|     | <i>Klebsiella pneumoniae</i> subsp. <i>pneumoniae</i> WGLW2       | P(γ) | K1NR75 | EKB79227.1/YP_001334448.1     | 403 | BLUF+EAL   | 1315 |
|     |                                                                   |      | K1N312 | EKB75950.1/YP_001335259.1     | 405 | BLUF+EAL   | 1316 |
|     | <i>Klebsiella pneumoniae</i> subsp. <i>pneumoniae</i> WGLW3       | P(γ) | K1N1S9 | YP_001334448.1/EKB75485.1     | 403 | BLUF+EAL   | 1317 |
|     |                                                                   |      | K1NLB8 | EKB77327.1/YP_001335259.1     | 405 | BLUF+EAL   | 1318 |



|     |                                                                        |       |        |                           |      |                     |      |
|-----|------------------------------------------------------------------------|-------|--------|---------------------------|------|---------------------|------|
|     | <i>Klebsiella pneumoniae</i> subsp. <i>pneumoniae</i> WGLW5            | P(y)  | K1Q3I3 | EKB86354.1/YP_001334448.1 | 403  | BLUF+EAL            | 1319 |
|     |                                                                        |       | K1Q1K2 | WP_004184418.1            | 390  | BLUF+EAL            | 1320 |
|     |                                                                        |       | K1P7W3 | EKB85222.1/YP_001335259.1 | 405  | BLUF+EAL            | 1321 |
| 276 | <i>Klebsiella pneumoniae</i> subsp. <i>rhinoscleromatis</i> ATCC 13884 | P(y)  | C8TA32 | EEW39489.1/YP_001335259.1 | 405  | BLUF+ EAL           | 1322 |
|     | <i>Klebsiella pneumoniae</i> subsp. <i>rhinoscleromatis</i> ATCC 13884 | P(y)  | C8T1B3 | WP_004142148.1            | 405  | BLUF+ EAL           | 1323 |
|     | <i>Klebsiella pneumoniae</i> UHKPC179                                  | P(y)  | S7FYI3 | YP_001334448.1            | 403  | BLUF+EAL            | 1324 |
|     | <i>Klebsiella pneumoniae</i> UHKPC23                                   | P(y)  | R9BEZ7 | EOR15588.1/YP_005226813.1 | 405  | BLUF+EAL            | 1325 |
|     | <i>Klebsiella pneumoniae</i> UHKPC57                                   | P(y)  | S2EQN8 | EPA91839.1/YP_001334448.1 | 403  | BLUF+EAL            | 1326 |
|     | <i>Klebsiella pneumoniae</i> UHKPC81                                   | P(y)  | S1UVJ0 | EOY85408.1/YP_001334448.1 | 403  | BLUF+EAL            | 1327 |
|     | <i>Klebsiella pneumoniae</i> VA360                                     | P(y)  | M5SGV5 | EMI36105.1/YP_005226813.1 | 405  | BLUF+EAL            | 1328 |
| 277 | <i>Klebsiella</i> sp. 1_1_55                                           | P(y)  | D6GDL7 | EFD87032.1/WP_008804990.1 | 405  | BLUF+ EAL           | 1329 |
|     |                                                                        |       | D6GGM4 | WP_008805714.1            | 403  | BLUF+ EAL           | 1330 |
|     | <i>Klebsiella</i> sp. 4_1_44FAA                                        | P(y)  | G9RCF4 | EHL93455.1/YP_001334448.1 | 403  | BLUF+EAL            | 1331 |
|     | <i>Klebsiella</i> sp. KTE92                                            | P(y)  | R8XC78 | EOQ54795.1/YP_002239613.1 | 403  | BLUF+EAL            | 1332 |
|     | <i>Klebsiella</i> sp. KTE92                                            | P(y)  | R8XFY6 | WP_016160979.1            | 405  | BLUF+EAL            | 1333 |
|     | <i>Klebsiella</i> sp. MS 92-3                                          | P(y)  | F3Q8C8 | EGF62238.1/YP_001335259.1 | 405  | BLUF+EAL            | 1334 |
|     |                                                                        |       | F3PZ97 | EGF65408.1/YP_001334448.1 | 403  | BLUF+EAL            | 1335 |
|     | <i>Klebsiella</i> sp. OBRC7                                            | P(y)  | J5V6R0 | WP_004849017.1            | 407  | BLUF+EAL            | 1336 |
| 278 | <i>Klebsiella variicola</i> (strain At-22)                             | P(y)  | D3RGS1 | YP_003439664.1            | 405  | BLUF+ EAL           | 1337 |
|     |                                                                        |       | D3RM34 | YP_003440514.1            | 403  | BLUF+ EAL           | 1338 |
|     | <i>Klebsiella variicola</i> CAG:634                                    | P(y)  | R5WD52 | CDA00595.1/YP_002239613.1 | 403  | BLUF+EAL            | 1339 |
|     |                                                                        |       | R5WE11 | WP_008804990.1            | 405  | BLUF+EAL            | 1340 |
|     |                                                                        |       | R5X5Z9 | WP_022066376.1            | 390  | BLUF+EAL            | 1341 |
| 279 | <i>Lamprocystis purpurea</i>                                           | P(y)  |        | WP_020505137.1            | 295  | BLUF+PsiE           | 1342 |
| 280 | <i>Legionella drancourtii</i> LLAP12                                   | P(y)  | G9ETS2 | WP_006872576.1            | 155  | Short-BLUF          | 1343 |
| 281 | <i>Legionella longbeachae</i> D-4968                                   | P(y)  | D1RLZ8 | WP_003636764.1            | 309  | BLUF+PAS            | 1344 |
| 282 | <i>Legionella longbeachae</i> serogroup 1 (strain NSW150)              | P(y)  | D3HJ09 | YP_003455474.1            | 708  | BLUF+3PAS+GGDEF     | 1345 |
| 283 | <i>Leucothrix mucor</i>                                                | P(y)  |        | WP_022951283.1            | 139  | Short-BLUF          | 1346 |
|     |                                                                        |       |        | WP_022951988.1            | 143  | Short-BLUF          | 1347 |
| 284 | <i>Marichromatium purpuratum</i> 984                                   | P(y)  | F9TWL2 | WP_005220255.1            | 1221 | 2PAS+GGDEF+EAL+BLUF | 1348 |
|     |                                                                        |       | F9TYC6 | WP_005221896.1            | 137  | Short-BLUF          | 1349 |
| 285 | <i>marine gamma proteobacterium</i> HTCC2080                           | P(y)U | A0Z2D8 | WP_007233984.1            | 150  | Short-BLUF          | 1350 |
|     |                                                                        |       | A0Z4F4 | WP_007234700.1            | 159  | Short-BLUF          | 1351 |
|     |                                                                        |       | A0Z3A0 | WP_007234296.1            | 152  | Short-BLUF          | 1352 |
| 286 | <i>marine gamma proteobacterium</i> HTCC2148                           | P(y)U | B7S2E6 | WP_007230530.1            | 127  | Short-BLUF          | 1353 |
| 287 | <i>Marinobacter adherens</i> (strain HP15)                             | P(y)  | E4PFT3 | YP_005885931.1            | 143  | Short-BLUF          | 1354 |
|     |                                                                        |       | E4PIQ9 |                           | 185  | Short-BLUF          | 1355 |
| 288 | <i>Marinobacter algicola</i> DG893                                     | P(y)  | A6F2F1 | WP_007154440.1            | 188  | Short-BLUF          | 1356 |
| 289 | <i>Marinobacter aquaeolei</i> VT8                                      | P(y)  | A1U4G7 | YP_960073.1               | 189  | Short-BLUF          | 1357 |
| 290 | <i>Marinobacter hydrocarbonoclasticus</i> ATCC 49840                   | P(y)  | H8WBH9 | YP_005430586.1            | 189  | Short-BLUF          | 1358 |
| 291 | <i>Marinobacter lipolyticus</i> SM19                                   | P(y)  | R8B0A9 | WP_012138058.1            | 151  | Short-BLUF          | 1359 |
| 292 | <i>Marinobacter manganoxydans</i> Mnl7-9                               | P(y)  | G6YW66 | WP_008175045.1            | 143  | Short-BLUF          | 1360 |
|     |                                                                        |       | G6YUG7 | WP_008174059.1            | 188  | Short-BLUF          | 1361 |
| 293 | <i>Marinomonas mediterranea</i> ATCC 700492                            | P(y)  | F2JZB3 | YP_004315034.1            | 138  | Short-BLUF          | 1362 |
|     |                                                                        |       | F2JWR3 | YP_004313663.1            | 144  | Short-BLUF          | 1363 |
| 294 | <i>Marinomonas posidonica</i> CECT 7376                                | P(y)  | F6CVF9 | YP_004482255.1            | 143  | Short-BLUF          | 1364 |
| 295 | <i>Marinomonas</i> sp. MED121                                          | P(y)  | A3YED7 | WP_009835955.1            | 140  | Short-BLUF          | 1365 |
|     |                                                                        |       | A3YFN4 | WP_009833224.1            | 152  | Short-BLUF          | 1366 |
|     |                                                                        |       | A3YFL0 | WP_009833248.1            | 154  | Short-BLUF          | 1367 |
|     | <i>Marinomonas</i> sp. MWYL1                                           | P(y)  | A6VYY7 | YP_001341601.1            | 142  | Short-BLUF          | 1368 |
| 296 | <i>Methylobacter marinus</i>                                           | P(y)  |        | WP_020161578.1            | 289  | BLUF+PsiE           | 1369 |
| 297 | <i>Methylobacter tundripaludum</i> SV96                                | P(y)  | G3ISM9 | WP_006890370.1            | 289  | Short-BLUF          | 1370 |
| 298 | <i>Methylohalobius crimeensis</i>                                      | P(y)  |        | WP_022950030.1            | 290  | BLUF+PsiE           | 1371 |



|     |                                                               |      |        |                               |      |                          |      |
|-----|---------------------------------------------------------------|------|--------|-------------------------------|------|--------------------------|------|
| 299 | <i>Methylobacterium alcaliphilum</i> DSM 19304                | P(y) | G4T071 | YP_004916955.1                | 136  | Short-BLUF               | 1372 |
|     |                                                               |      | G4T077 | YP_004916961.1                | 294  | Short-BLUF               | 1373 |
|     |                                                               |      | G4T0S3 | YP_004915950.1                | 141  | Short-BLUF               | 1374 |
|     |                                                               |      | G4T2T3 | YP_004916161.1                | 1111 | PAS+GGDEF+EAL+BLUF       | 1375 |
| 300 | <i>Methylobacterium buryatense</i>                            | P(y) |        | WP_017838976.1                | 294  | BLUF+PsiE                | 1376 |
|     |                                                               |      |        | WP_017840127.1                | 1097 | LeuBD+PAS+GGDEF+EAL+BLUF | 1377 |
|     |                                                               |      |        | WP_017840877.1                | 141  | Short-BLUF               | 1378 |
|     |                                                               |      |        | WP_017840373.1                | 141  | Short-BLUF               | 1379 |
|     |                                                               |      |        | WP_017838971.1                | 136  | Short-BLUF               | 1380 |
| 301 | <i>Methylobacterium japonense</i>                             | P(y) | Q25BV7 | BAE86881.1                    | 141  | Short-BLUF               | 1381 |
| 302 | <i>Methylomonas methanica</i> (strain MC09)                   | P(y) | G0A610 | YP_004512959.1                | 120  | Short-BLUF               | 1382 |
|     |                                                               |      | G0A1P9 | YP_004512609.1                | 292  | Short-BLUF               | 1383 |
|     |                                                               |      | G0A2A9 | YP_004511421.1                | 1104 | PAS+GGDEF+EAL+BLUF       | 1384 |
| 303 | <i>Methylophaga aminisulfidivorans</i> MP                     | P(y) | F5T211 | WP_007146401.1                | 140  | Short-BLUF               | 1385 |
| 304 | <i>Methylophaga lonarensis</i> MPL                            | P(y) | M7PJN9 | WP_009725326.1                | 159  | Short-BLUF               | 1386 |
| 305 | <i>Methylophaga thiooxidans</i> DMS010                        | P(y) | C0N5Z8 | WP_008291053.1                | 139  | Short-BLUF               | 1387 |
|     |                                                               |      | C0N9F9 | WP_008292188.1                | 136  | Short-BLUF               | 1388 |
| 306 | <i>Neptuniibacter caesariensis</i>                            | P(y) | Q2BIC6 | WP_007020013.1                | 142  | Short-BLUF               | 1389 |
|     |                                                               |      | Q2BP57 | WP_007020760.1                | 147  | Short-BLUF               | 1390 |
| 307 | <i>Nevskia ramosa</i>                                         | P(y) |        | WP_022977191.1                | 429  | BLUF+SCHICH              | 1391 |
| 308 | <i>Pantoea agglomerans</i>                                    | P(y) |        | WP_022625735.1                | 403  | BLUF+EAL                 | 1392 |
|     |                                                               |      |        | WP_010671955.1                | 395  | BLUF+EAL                 | 1393 |
|     |                                                               |      |        | WP_010670046.1                | 403  | BLUF+EAL                 | 1394 |
|     |                                                               |      |        | WP_022624234.1                | 395  | BLUF+EAL                 | 1395 |
|     | <i>Pantoea agglomerans</i> 299R                               | P(y) | L7BXC6 | ELP25506.1/WP_003850648.1     | 395  | BLUF+EAL                 | 1396 |
|     |                                                               |      | L7BW56 | ELP25775.1/WP_003850263.1     | 403  | BLUF+EAL                 | 1397 |
| 309 | <i>Pantoea ananatis</i>                                       | P(y) |        | WP_019105298.1                | 415  | BLUF+EAL                 | 1398 |
|     | <i>Pantoea ananatis</i> (strain AJ13355)                      | P(y) | F2ET35 | YP_005195892.1                | 403  | BLUF+EAL                 | 1399 |
|     |                                                               |      | F2EZT9 | YP_003522512.1                | 397  | BLUF+EAL                 | 1400 |
|     | <i>Pantoea ananatis</i> (strain LMG 20103)                    | P(y) | D4GGD1 | CP001875.2/YP_003522512.1     | 397  | BLUF+ EAL                | 1401 |
|     |                                                               |      | D4GDM8 | YP_003520043.1                | 403  | BLUF+ EAL                | 1402 |
|     | <i>Pantoea ananatis</i> LMG 5342                              | P(y) | G9AT61 | CCF09855.1/YP_005195892.1     | 403  | BLUF+EAL                 | 1403 |
|     |                                                               |      | G9AXC0 | YP_005197808.1                | 397  | BLUF+EAL                 | 1404 |
|     | <i>Pantoea ananatis</i> PA13                                  | P(y) | G7UHX4 | YP_005993091.1/YP_005195892.1 | 403  | BLUF+EAL                 | 1405 |
|     |                                                               |      | G7UM94 | YP_005990549.1                | 397  | BLUF+EAL                 | 1406 |
| 310 | <i>Pantoea dispersa</i> EGD-AAK13                             | P(y) | U1TTN2 | WP_021509874.1                | 403  | BLUF+EAL                 | 1407 |
| 311 | <i>Pantoea</i> sp. aB                                         | P(y) | E0M383 | WP_008926784.1                | 405  | BLUF+EAL                 | 1408 |
|     |                                                               |      | E0M391 | ELP25506.1/WP_003850648.1     | 395  | BLUF+EAL                 | 1409 |
|     |                                                               |      | E0M088 | EFM19210.1/WP_003850263.1     | 403  | BLUF+EAL                 | 1410 |
|     | <i>Pantoea</i> sp. AS-PWVM4                                   | P(y) | U2M401 | WP_021182872.1                | 403  | BLUF+EAL                 | 1411 |
|     | <i>Pantoea</i> sp. At-9b                                      | P(y) | E6WL97 | YP_004118738.1                | 386  | BLUF+EAL                 | 1412 |
|     |                                                               |      | E6WBK2 | YP_004116243.1                | 403  | BLUF+EAL                 | 1413 |
|     | <i>Pantoea</i> sp. GM01                                       | P(y) | J2LHM1 | WP_007891430.1                | 403  | BLUF+EAL                 | 1414 |
|     | <i>Pantoea</i> sp. Sc1                                        | P(y) | H8DUK7 | WP_009093254.1                | 395  | BLUF+EAL                 | 1415 |
|     |                                                               |      | H8DLJ6 | WP_009090445.1                | 403  | BLUF+EAL                 | 1416 |
|     |                                                               |      | H8DUL4 | WP_009093262.1                | 405  | BLUF+EAL                 | 1417 |
|     | <i>Pantoea</i> sp. SL1_M5                                     | P(y) |        | WP_010256946.1                | 395  | BLUF+EAL                 | 1418 |
|     |                                                               |      |        | WP_010245539.1                | 403  | BLUF+EAL                 | 1419 |
|     | <i>Pantoea</i> sp. YR343                                      | P(y) | J2UXE8 | WP_008105386.1                | 403  | BLUF+EAL                 | 1420 |
| 312 | <i>Pantoea stewartii</i> subsp. <i>stewartii</i> DC283        | P(y) | H3RKF0 | WP_006122006.1                | 134  | Short-BLUF               | 1421 |
|     |                                                               |      | H3RCE8 | WP_006119001.1                | 403  | BLUF+EAL                 | 1422 |
| 313 | <i>Pantoea vagans</i> C9-1 ( <i>Pantoea agglomerans</i> C9-1) | P(y) | E1SBR1 | YP_003930829.1                | 403  | BLUF+EAL                 | 1423 |
|     |                                                               |      | E1PKB3 | YP_003929520.1                | 404  | BLUF+EAL                 | 1424 |

|     |                                                       |      |        |                |     |            |      |
|-----|-------------------------------------------------------|------|--------|----------------|-----|------------|------|
|     |                                                       |      | E1PKA4 | YP_003929511.1 | 409 | BLUF+EAL   | 1425 |
| 314 | <i>Pectobacterium carotovorum</i>                     | P(y) |        | WP_010274875.1 | 406 | BLUF+EAL   | 1426 |
| 315 | <i>Perluclidibaca piscinae</i>                        | P(y) |        | WP_022956463.1 | 150 | Short-BLUF | 1427 |
| 316 | <i>Plautia stali symbiont</i>                         | P(y) |        | YP_008652566.1 | 149 | Short-BLUF | 1428 |
|     |                                                       |      |        | YP_008649935.1 | 398 | BLUF+EAL   | 1429 |
|     |                                                       |      |        | WP_010615636.1 | 386 | BLUF+EAL   | 1430 |
| 317 | <i>Pseudoalteromonas atlantica</i>                    | P(y) |        | WP_011573653.1 | 138 | Short-BLUF | 1431 |
|     | <i>Pseudoalteromonas atlantica</i> (T6c / BAA-1087)   | P(y) | Q15XU6 | YP_660346.1    | 138 | Short-BLUF | 1432 |
|     |                                                       |      | Q15W34 | YP_660958.1    | 133 | Short-BLUF | 1433 |
| 318 | <i>Pseudoalteromonas citrea</i>                       | P(y) |        | WP_010367293.1 | 139 | Short-BLUF | 1434 |
|     | <i>Pseudoalteromonas citrea</i> NCIMB 1889            | P(y) | U1KR28 | WP_010361781.1 | 145 | Short-BLUF | 1435 |
| 319 | <i>Pseudoalteromonas luteoviolacea</i>                | P(y) |        | WP_023398227.1 | 138 | Short-BLUF | 1436 |
|     |                                                       |      |        | WP_023397937.1 | 143 | Short-BLUF | 1437 |
|     | <i>Pseudoalteromonas luteoviolacea</i> B = ATCC 29581 | P(y) | L8D6G6 | WP_005493992.1 | 144 | Short-BLUF | 1438 |
|     |                                                       |      | L8DBD1 | WP_005493516.1 | 139 | Short-BLUF | 1439 |
| 320 | <i>Pseudoalteromonas marina</i> mano4                 | P(y) | U1JNR5 | WP_010557655.1 | 141 | Short-BLUF | 1440 |
| 321 | <i>Pseudoalteromonas rubra</i> ATCC 29570             | P(y) | U1LSW8 | WP_010383116.1 | 142 | Short-BLUF | 1441 |
| 322 | <i>Pseudoalteromonas rutenica</i>                     | P(y) |        | WP_022946637.1 | 140 | Short-BLUF | 1442 |
| 323 | <i>Pseudoalteromonas</i> sp. BS120311                 | P(y) | G7EN43 | WP_008108394.1 | 141 | Short-BLUF | 1443 |
|     | <i>Pseudoalteromonas</i> sp. BS120439                 | P(y) | G7FK05 | GAA73478.1     | 141 | Short-BLUF | 1444 |
|     | <i>Pseudoalteromonas</i> sp. BS120480                 | P(y) | G7FLG8 | WP_008127010.1 | 141 | Short-BLUF | 1445 |
|     | <i>Pseudoalteromonas</i> sp. BS120652                 | P(y) | G7ED85 | WP_008166519.1 | 141 | Short-BLUF | 1446 |
|     | <i>Pseudoalteromonas</i> sp. PAMC 22718               | P(y) |        | WP_016900061.1 | 141 | Short-BLUF | 1447 |
|     | <i>Pseudoalteromonas</i> sp. SM9913                   | P(y) | E6RIH7 | YP_004067295.1 | 138 | Short-BLUF | 1448 |
| 324 | <i>Pseudoalteromonas spongiae</i>                     | P(y) |        | WP_010558562.1 | 143 | Short-BLUF | 1449 |
|     |                                                       |      |        | WP_010562063.1 | 142 | Short-BLUF | 1450 |
| 325 | <i>Pseudoalteromonas tunicata</i> D2                  | P(y) | A4C8E2 | WP_009838119.1 | 140 | Short-BLUF | 1451 |
|     |                                                       |      | A4CA03 | WP_009840043.1 | 133 | Short-BLUF | 1452 |
| 326 | <i>Pseudoalteromonas undina</i> NCIMB 2128            | P(y) | U1MG36 | WP_010392015.1 | 141 | Short-BLUF | 1453 |
| 327 | <i>Pseudomonas alcaligenes</i> NBRC 14159             | P(y) | U2ZK93 | WP_021699986.1 | 144 | Short-BLUF | 1454 |
| 328 | <i>Pseudomonas alcaliphila</i>                        | P(y) |        | WP_017675860.1 | 144 | Short-BLUF | 1455 |
| 329 | <i>Pseudomonas pseudoalcaligenes</i> CECT 5344        | P(y) | I7K7F2 | WP_003463988.1 | 267 | Short-BLUF | 1456 |
| 330 | <i>Psychrobacter aquaticus</i>                        | P(y) |        | WP_021813036.1 | 174 | Short-BLUF | 1457 |
|     |                                                       |      |        | WP_021815321.1 | 156 | Short-BLUF | 1458 |
|     |                                                       |      |        | WP_021812947.1 | 202 | Short-BLUF | 1459 |
|     |                                                       |      |        | WP_021813035.1 | 145 | Short-BLUF | 1460 |
|     |                                                       |      |        | WP_021814263.1 | 210 | Short-BLUF | 1461 |
|     |                                                       |      |        | WP_021815442.1 | 168 | Short-BLUF | 1462 |
| 331 | <i>Psychrobacter arcticum</i>                         | P(y) | Q4FUS2 | YP_263670.1    | 210 | Short-BLUF | 1463 |
| 332 | <i>Psychrobacter cryohalolentis</i> (strain K5)       | P(y) | Q1QDR2 | YP_579675.1    | 210 | Short-BLUF | 1464 |
|     |                                                       |      | Q1Q9K9 | YP_581128.1    | 196 | Short-BLUF | 1465 |
|     |                                                       |      | Q1QAA1 | YP_580886.1    | 169 | Short-BLUF | 1466 |
| 333 | <i>Psychrobacter lutiphocae</i>                       | P(y) |        | WP_019674133.1 | 215 | Short-BLUF | 1467 |
|     |                                                       |      |        | WP_019672901.1 | 213 | Short-BLUF | 1468 |
| 334 | <i>Psychrobacter</i> sp. 1501(2011)                   | P(y) | F5SNV9 | WP_007394103.1 | 209 | Short-BLUF | 1469 |
|     |                                                       |      | F5SLW1 | WP_007393405.1 | 216 | Short-BLUF | 1470 |
|     | <i>Psychrobacter</i> sp. G                            | P(y) | S4YVW0 | YP_008163550.1 | 169 | Short-BLUF | 1471 |
|     |                                                       |      | T1EBM8 | YP_008163896.1 | 207 | Short-BLUF | 1472 |
|     |                                                       |      | S4YSN3 | YP_008162349.1 | 210 | Short-BLUF | 1473 |
|     | <i>Psychrobacter</i> sp. PAMC 21119                   | P(y) |        | WP_010201341.1 | 172 | Short-BLUF | 1474 |
|     |                                                       |      |        | WP_010201340.1 | 145 | Short-BLUF | 1475 |
|     |                                                       |      |        | WP_010196365.1 | 207 | Short-BLUF | 1476 |
|     |                                                       |      |        | WP_010201745.1 | 208 | Short-BLUF | 1477 |

|     |                                             |      |        |                               |     |            |      |
|-----|---------------------------------------------|------|--------|-------------------------------|-----|------------|------|
|     | <i>Psychrobacter</i> sp. PRwf-1             | P(γ) | A5WCY1 | YP_001279472.1                | 209 | Short-BLUF | 1478 |
|     |                                             |      | A5WEX6 | YP_001280167.1                | 216 | Short-BLUF | 1479 |
| 335 | <i>Psychromonas ingrahamii</i> (strain 37)  | P(γ) | A1SZ77 | YP_944391.1                   | 157 | Short-BLUF | 1480 |
| 336 | <i>Rahnella aquatilis</i> ATCC 33071        | P(γ) | H2J1E2 | YP_005220397.1                | 413 | BLUF+EAL   | 1481 |
|     | <i>Rahnella aquatilis</i> HX2               | P(γ) | H8P0G4 | YP_005419028.1                | 413 | BLUF+EAL   | 1482 |
| 337 | <i>Rahnella</i> sp. (strain Y9602)          | P(γ) | E8XZI5 | YP_004215373.1                | 413 | BLUF+EAL   | 1483 |
| 338 | <i>Reinekea</i> sp. MED297                  |      | A4BGV1 | WP_008047183.1                | 172 | Short-BLUF | 1484 |
| 339 | <i>Rheinheimera</i> sp. A13L                | P(γ) | F7NUK1 | WP_008898335.1                | 141 | Short-BLUF | 1485 |
| 340 | <i>Salinisphaera shabanensis</i> E1L3A      | P(γ) | F7Q923 | WP_006913789.1                | 142 | Short-BLUF | 1486 |
| 341 | <i>Serratia</i> sp. M24T3                   | P(γ) | I0QUJ8 | WP_009636506.1                | 404 | BLUF+EAL   | 1487 |
| 342 | <i>Shewanella oneidensis</i>                | P(γ) | Q8EBA3 | NP_719171.1                   | 140 | Short-BLUF | 1488 |
| 343 | <i>Shewanella woodyi</i> ATCC 51908         | P(γ) | B1KH49 | YP_001762456.1                | 156 | Short-BLUF | 1489 |
| 344 | <i>Shigella boydii</i> 4444-74              | P(γ) | I6EHF9 | EIQ43451.1/WP_000958290.1     | 133 | Short-BLUF | 1490 |
|     | <i>Shigella boydii</i> 5216-82              | P(γ) | F3WJP8 | WP_004992970.1                | 372 | BLUF+EAL   | 1491 |
|     | <i>Shigella boydii</i> 965-58               | P(γ) | I6DEL8 | WP_004999597.1                | 403 | BLUF+EAL   | 1492 |
|     | <i>Shigella boydii</i> ATCC 9905            | P(γ) | E7T1P3 | WP_004976550.1                | 372 | BLUF+EAL   | 1493 |
| 345 | <i>Shigella dysenteriae</i> 1012            | P(γ) | B3X612 | WP_005013749.1                | 311 | BLUF+ EAL  | 1494 |
|     | <i>Shigella dysenteriae</i> 155-74          | P(γ) | F3V2I3 | WP_000958286.1                | 342 | BLUF+EAL   | 1495 |
| 346 | <i>Shigella flexneri</i> 1485-80            | P(γ) | K0XUP4 | EJZ67510.1/WP_000958290.1     | 133 | Short-BLUF | 1496 |
|     | <i>Shigella flexneri</i> 2850-71            | P(γ) | I6BWJ3 | WP_005109173.1                | 261 | BLUF+EAL   | 1497 |
|     | <i>Shigella flexneri</i> CCH060             | P(γ) | I6C3N2 | EIQ14124.1/WP_000958290.1     | 133 | Short-BLUF | 1498 |
|     | <i>Shigella flexneri</i> J1713              | P(γ) | F7R7D0 | WP_005101736.1                | 386 | BLUF+EAL   | 1499 |
|     | <i>Shigella flexneri</i> VA-6               | P(γ) | F5N0U1 | WP_005067857.1                | 372 | BLUF+EAL   | 1500 |
| 347 | <i>Shigella sonnei</i> 53G                  | P(γ) | E7K4N8 | WP_005140026.1                | 198 | Short-BLUF | 1501 |
| 348 | <i>Shigella</i> sp. D9                      | P(γ) | F4NHE2 | EGJ05355.1/WP_000243121.1     | 429 | BLUF+EAL   | 1502 |
| 349 | <i>Simidiua agarivorans</i> SA1 = DSM 21679 | P(γ) |        | YP_006916092.1                | 176 | Short-BLUF | 1503 |
| 350 | <i>Spongibacter tropicus</i>                | P(γ) |        | WP_022958549.1                | 139 | Short-BLUF | 1504 |
| 351 | <i>Stenotrophomonas maltophilia</i>         | P(γ) |        | WP_019661581.1                | 139 | Short-BLUF | 1505 |
|     |                                             |      |        | WP_019659714.1                | 155 | Short-BLUF | 1506 |
|     | <i>Stenotrophomonas maltophilia</i> Ab55555 | P(γ) | J7V2U9 | WP_005408981.1/YP_001971521.1 | 144 | Short-BLUF | 1507 |
|     |                                             |      | J7VQR4 | WP_005409694.1                | 155 | Short-BLUF | 1508 |
|     | <i>Stenotrophomonas maltophilia</i> AU12-09 | P(γ) | M5TMH3 | WP_005416006.1                | 144 | Short-BLUF | 1509 |
|     |                                             |      | M5TWK9 | WP_005416570.1                | 155 | Short-BLUF | 1510 |
|     | <i>Stenotrophomonas maltophilia</i> D457    | P(γ) | I0KM94 | YP_006184358.1                | 144 | Short-BLUF | 1511 |
|     |                                             |      | I0KNV6 | YP_006184918.1                | 155 | Short-BLUF | 1512 |
|     | <i>Stenotrophomonas maltophilia</i> EPM1    | P(γ) | M3FAW7 | YP_001971521.1                | 144 | Short-BLUF | 1513 |
|     | <i>Stenotrophomonas maltophilia</i> EPM1    | P(β) | M3G6A4 | WP_005413472.1                | 155 | Short-BLUF | 1514 |
|     | <i>Stenotrophomonas maltophilia</i> JV3     | P(γ) | G0JUR4 | YP_004792041.1                | 144 | Short-BLUF | 1515 |
|     |                                             |      | G0K4E1 | YP_004794149.1                | 143 | Short-BLUF | 1516 |
|     |                                             |      | G0JY27 | YP_004792350.1                | 142 | Short-BLUF | 1517 |
|     | <i>Stenotrophomonas maltophilia</i> K279a   | P(γ) | B2FSB2 | YP_001972310.1                | 155 | Short-BLUF | 1518 |
|     |                                             |      | B2FNU4 | YP_001971901.1                | 144 | Short-BLUF | 1519 |
|     |                                             |      | B2FSB7 | YP_001972315.1                | 132 | Short-BLUF | 1520 |
|     |                                             |      | B2FK66 | CAQ45217.1/YP_001971521.1     | 144 | Short-BLUF | 1521 |
|     |                                             |      | B2FSU5 | YP_001972350.1                | 157 | Short-BLUF | 1522 |
|     |                                             |      | B2FSA5 | YP_001972303.1                | 149 | Short-BLUF | 1523 |
|     | <i>Stenotrophomonas maltophilia</i> MF89    | P(γ) | T5KGS5 | WP_019658901.1                | 144 | Short-BLUF | 1524 |
|     |                                             |      | T5L8X7 | WP_021202418.1                | 155 | Short-BLUF | 1525 |
|     | <i>Stenotrophomonas maltophilia</i> RA8     | P(γ) | M5D728 | YP_002027818.1                | 144 | Short-BLUF | 1526 |
|     | <i>Stenotrophomonas maltophilia</i> R551-3  | P(γ) | B4STM1 | YP_002028128.1                | 142 | Short-BLUF | 1527 |
|     |                                             |      | B4SR64 | ACF51135.1/YP_002027818.1     | 144 | Short-BLUF | 1528 |
|     | <i>Stenotrophomonas maltophilia</i> SKK35   | P(γ) | M5CLY6 | CCP10895.1                    | 144 | Short-BLUF | 1529 |
|     | <i>Stenotrophomonas</i> sp. SKA14           | P(γ) | B8L2D7 | WP_008267235.1                | 144 | Short-BLUF | 1530 |

|     |                                                                 |       |        |                           |      |                     |      |
|-----|-----------------------------------------------------------------|-------|--------|---------------------------|------|---------------------|------|
|     |                                                                 |       | B8LA17 | WP_008268182.1            | 142  | Short-BLUF          | 1531 |
| 352 | <i>Teredinibacter turnerae</i>                                  | P(γ)  |        | WP_018415581.1            | 138  | Short-BLUF          | 1532 |
|     |                                                                 |       |        | WP_018276843.1            | 138  | Short-BLUF          | 1533 |
| 353 | <i>Thioalkalimicrobium aerophilum</i> AL3                       | P(γ)  | G4D9V3 | WP_006459896.1            | 135  | Short-BLUF          | 1534 |
| 354 | <i>Thioalkalivibrio</i> sp. HL-EbGR7                            | P(γ)  | B8GPZ7 | YP_002515131.1            | 168  | Short-BLUF          | 1535 |
|     | <i>Thioalkalivibrio</i> sp. K90mix                              | P(γ)  | D3SBJ7 | YP_003461138.1            | 196  | Short-BLUF          | 1536 |
| 355 | <i>Thiocystis violascens</i> (Chromatium violascens) ATCC 17096 | P(γ)  | I3YBW9 | YP_006414612.1            | 597  | GGDEF+EAL+BLUF      | 1537 |
| 356 | <i>Thioflavococcus mobilis</i> 8321                             | P(γ)  | L0H2H2 | YP_007245882.1            | 293  | BLUF+PsiE           | 1538 |
| 357 | <i>Thiorhodococcus drewsii</i> AZ1                              | P(γ)  | G2DZK4 | WP_007040181.1            | 1199 | 2PAS+GGDEF+EAL+BLUF | 1539 |
|     |                                                                 |       | G2E4Y1 | WP_007042057.1            | 151  | Short-BLUF          | 1540 |
| 358 | <i>Thiorhodospira sibirica</i> ATCC 700588                      | P(γ)  | G4E7K7 | WP_006788315.1            | 139  | Short-BLUF          | 1541 |
|     |                                                                 |       | G4E8F6 | WP_006788612.1            | 1099 | 2PAS+GGDEF+EAL+BLUF | 1542 |
| 359 | <i>Thiorhodovibrio</i> sp. 970                                  | P(γ)  | H8Z515 | WP_009150825.1            | 148  | Short-BLUF          | 1543 |
|     |                                                                 |       | H8Z1A9 | WP_009148009.1            | 299  | Short-BLUF          | 1544 |
| 360 | uncultured gamma proteobacterium                                | P(γ)U | H5SE04 | BAL54390.1                | 113  | Short-BLUF          | 1545 |
| 361 | uncultured <i>Thiohalocapsa</i> sp. PB-PSB1                     | P(γ)  |        | WP_023410594.1            | 183  | Short-BLUF          | 1546 |
|     |                                                                 |       |        | WP_023414210.1            | 149  | Short-BLUF          | 1547 |
| 362 | <i>Vibrio</i>                                                   | P(γ)  |        | WP_017060344.1            | 139  | Short-BLUF          | 1548 |
| 363 | <i>Vibrio breoganii</i>                                         | P(γ)  |        | WP_017029863.1            | 141  | Short-BLUF          | 1549 |
|     |                                                                 |       |        | WP_017031909.1            | 141  | Short-BLUF          | 1550 |
| 364 | <i>Vibrio cholera</i> RC385                                     | P(γ)  | D7HCX4 | WP_001885575.1            | 142  | Short-BLUF          | 1551 |
|     | <i>Vibrio cholerae</i>                                          | P(γ)  |        | WP_019829651.1            | 142  | Short-BLUF          | 1552 |
| 365 | <i>Vibrio coralliilyticus</i> ATCC BAA-450                      | P(γ)  | C9NR36 | WP_006958871.1            | 139  | Short-BLUF          | 1553 |
|     |                                                                 |       | C9NQ17 | WP_006958783.1            | 136  | Short-BLUF          | 1554 |
|     |                                                                 |       | C9NPY7 | WP_006958749.1            | 104  | Short-BLUF          | 1555 |
|     |                                                                 |       | C9NVS2 | WP_006961401.1            | 141  | Short-BLUF          | 1556 |
|     | <i>Vibrio coralliilyticus</i> OCN008                            | P(γ)  | U0ET87 | WP_019275344.1            | 141  | Short-BLUF          | 1557 |
| 366 | <i>Vibrio crassostreae</i>                                      | P(γ)  |        | WP_017065379.1            | 139  | Short-BLUF          | 1558 |
|     |                                                                 |       |        | WP_017067227.1            | 139  | Short-BLUF          | 1559 |
|     |                                                                 |       |        | WP_017070503.1            | 139  | Short-BLUF          | 1560 |
| 367 | <i>Vibrio cyclitrophicus</i>                                    | P(γ)  |        | WP_016768597.1            | 139  | Short-BLUF          | 1561 |
|     |                                                                 |       |        | WP_010440401.1            | 139  | Short-BLUF          | 1562 |
|     |                                                                 |       |        | WP_016796603.1            | 139  | Short-BLUF          | 1563 |
|     |                                                                 |       |        | WP_016793122.1            | 139  | Short-BLUF          | 1564 |
| 368 | <i>Vibrio genomosp.</i> F10                                     | P(γ)  |        | WP_017038440.1            | 139  | Short-BLUF          | 1565 |
|     |                                                                 |       |        | WP_017034560.1            | 139  | Short-BLUF          | 1566 |
|     | <i>Vibrio genomosp.</i> F6                                      | P(γ)  |        | WP_017052207.1            | 139  | Short-BLUF          | 1567 |
| 369 | <i>Vibrio ichthyenteri</i> ATCC 700023                          | P(γ)  | F9S3C4 | WP_006712577.1            | 134  | Short-BLUF          | 1568 |
| 370 | <i>Vibrio nigripulchritudo</i>                                  | P(γ)  |        | WP_022604223.1            | 138  | Short-BLUF          | 1569 |
|     |                                                                 |       |        | YP_008620961.1            | 138  | Short-BLUF          | 1570 |
|     |                                                                 |       |        | WP_022589537.1            | 127  | Short-BLUF          | 1571 |
|     |                                                                 |       |        | WP_022600546.1            | 127  | Short-BLUF          | 1572 |
|     |                                                                 |       |        | YP_008641840.1            | 127  | Short-BLUF          | 1573 |
|     | <i>Vibrio nigripulchritudo</i> ATCC 27043                       | P(γ)  | F9THX2 | WP_004400464.1            | 138  | Short-BLUF          | 1574 |
|     | <i>Vibrio nigripulchritudo</i> ATCC 27043                       | P(γ)  | F9TGM9 | EGU61078.1/WP_004399602.1 | 127  | Short-BLUF          | 1575 |
| 371 | <i>Vibrio ordalii</i>                                           | P(γ)  |        | WP_010320661.1            | 145  | Short-BLUF          | 1576 |
| 372 | <i>Vibrio orientalis</i> CIP 102891 = ATCC 33934                | P(γ)  | C9QIB2 | WP_004414323.1            | 60   | Short-BLUF          | 1577 |
| 373 | <i>Vibrio scopthalmi</i> LMG 19158                              | P(γ)  | F9RIQ0 | WP_005592861.1            | 139  | Short-BLUF          | 1578 |
| 374 | <i>Vibrio sinaloensis</i> DSM 21326                             | P(γ)  | E8M6S4 | WP_008076812.1            | 139  | Short-BLUF          | 1579 |
| 375 | <i>Vibrio</i> sp. MED222                                        | P(γ)  | A3Y2H2 | WP_009847120.1            | 142  | Short-BLUF          | 1580 |
| 376 | <i>Vibrio splendidus</i>                                        | P(γ)  |        | WP_017079037.1            | 139  | Short-BLUF          | 1581 |
|     |                                                                 |       |        | WP_017090104.1            | 139  | Short-BLUF          | 1582 |
|     |                                                                 |       |        | WP_017093202.1            | 139  | Short-BLUF          | 1583 |

|     |                                                                       |         |        |                            |      |                    |      |
|-----|-----------------------------------------------------------------------|---------|--------|----------------------------|------|--------------------|------|
|     |                                                                       |         |        | WP_017073405.1             | 139  | Short-BLUF         | 1584 |
|     |                                                                       |         |        | WP_019824217.1             | 139  | Short-BLUF         | 1585 |
|     | <i>Vibrio splendidus</i> 12B01                                        | P(γ)    | A3UYZ3 | WP_004734641.1             | 141  | Short-BLUF         | 1586 |
|     | <i>Vibrio splendidus</i> Me132                                        | P(γ)    | B7VGM9 | YP_002417504.1             | 139  | Short-BLUF         | 1587 |
| 377 | <i>Vibrio tasmaniensis</i>                                            | P(γ)    |        | WP_017097344.1             | 139  | Short-BLUF         | 1588 |
| 378 | <i>Vibrio tubiashii</i> ATCC 19109                                    | P(γ)    | F9T3Q3 | EGU56983.1/WP_004744136.1  | 151  | Short-BLUF         | 1589 |
|     | <i>Vibrio tubiashii</i> NCIMB 1337 = ATCC 19106                       | P(γ)    | I1DCC9 | WP_004744136.1             | 151  | Short-BLUF         | 1590 |
| 379 | <i>Vibrio vulnificus</i>                                              | P(γ)    |        | WP_017420365.1             | 139  | Short-BLUF         | 1591 |
|     | <i>Vibrio vulnificus</i>                                              | P(γ)    |        | WP_017790365.1             | 139  | Short-BLUF         | 1592 |
| 380 | <i>Vibrionales bacterium</i> SWAT-3                                   | P(γ)    | A5L553 | WP_008222460.1             | 139  | Short-BLUF         | 1593 |
| 381 | <i>Xanthomonadaceae</i>                                               | P(γ)    |        | WP_010486035.1             | 144  | Short-BLUF         | 1594 |
| 382 | <i>Xanthomonas axonopodis</i>                                         | P(γ)    |        | WP_016850851.1             | 159  | Short-BLUF         | 1595 |
|     |                                                                       |         |        | WP_017158845.1             | 158  | Short-BLUF         | 1596 |
|     |                                                                       |         |        | WP_017156640.1             | 159  | Short-BLUF         | 1597 |
| 383 | <i>Xanthomonas axonopodis</i> pv. <i>citri</i> str.306                | P(γ)    | Q8PHH6 | AAM38122.1/NP_643586.1     | 147  | Short-BLUF         | 1598 |
|     |                                                                       |         | Q8PKP9 | AAM36973./NP_642437.1      | 158  | Short-BLUF         | 1599 |
| 384 | <i>Xanthomonas axonopodis</i> pv. <i>punicae</i> str. LMG 859         | P(γ)    | H1XN33 | WP_005934425.1             | 128  | Short-BLUF         | 1600 |
|     | <i>Xanthomonas axonopodis</i> Xac29-1                                 | P(γ)    | M4TW81 | YP_007636565.1/NP_642437.1 | 158  | Short-BLUF         | 1601 |
|     |                                                                       |         | M4TZI7 | NP_643586.1                | 147  | Short-BLUF         | 1602 |
| 385 | <i>Xanthomonas citri</i> pv. <i>mangiferae</i> indicae LMG 941        | P(γ)    | H8FLF5 | WP_003490419.1             | 158  | Short-BLUF         | 1603 |
| 386 | <i>Xanthomonas citri</i> subsp. <i>citri</i> Aw12879                  | P(γ)    | M4WEN8 | NP_642437.1                | 158  | Short-BLUF         | 1604 |
| 387 | <i>Xanthomonas fuscans</i> subsp. <i>aurantifolia</i> str. ICPB 10535 | P(γ)    | D4TC91 | WP_007975774.1             | 147  | Short-BLUF         | 1605 |
|     |                                                                       |         | D4SRA6 | WP_007962696.1             | 159  | Short-BLUF         | 1606 |
| 388 | <i>Xanthomonas fuscans</i> subsp. <i>fuscans</i>                      | P(γ)    |        | YP_008638953.1             | 159  | Short-BLUF         | 1607 |
| 389 | <i>Xanthomonas perforans</i> 91-118                                   | P(γ)    | F0BUQ3 | WP_008575691.1             | 184  | Short-BLUF         | 1608 |
| 390 | <i>Xanthomonas</i> sp. M97                                            | P(γ)    |        | WP_022971905.1             | 144  | Short-BLUF         | 1609 |
| 391 | <i>Bacteriovorax</i> sp. BAL6_X                                       | P(δ)    | T0C040 | WP_021268210.1             | 153  | Short-BLUF         | 1610 |
| 392 | <i>Bdellovibrio bacteriovorus</i> str. <i>Tiberius</i>                | P(δ)    | K7YL37 | YP_007021703.1             | 142  | Short-BLUF         | 1611 |
| 393 | <i>Desulfatibacillum alkenivorans</i> AK-011                          | P(δ)    | B8FK53 | YP_002430196.1             | 144  | Short-BLUF         | 1612 |
| 394 | <i>Desulfococcus oleovorans</i> Hxd3                                  | P(δ)    | A9A0H4 | YP_001529551.1             | 148  | Short-BLUF         | 1613 |
| 395 | <i>Desulfovibrio longus</i>                                           | P(δ)    |        | WP_022663022.1             | 146  | Short-BLUF         | 1614 |
| 396 | <i>Myxococcus xanthus</i> DK1622                                      | P(δ)    | Q93SK7 |                            | 253  | Short-BLUF         | 1615 |
| 397 | uncultured <i>Desulfofustis</i> sp. PB-SRB1                           | P(δ)Unc |        | WP_023408928.1             | 144  | Short-BLUF         | 1616 |
| 398 | <i>Magnetococcus</i> sp. MC-1                                         | P(Magn) | A0LAZ4 | YP_866543.1                | 1118 | PAS+GGDEF+EAL+BLUF | 1617 |
|     |                                                                       |         | A0L5S5 | YP_864724.1                | 139  | Short-BLUF         | 1618 |
|     |                                                                       |         | A0LAQ1 | YP_866450.1                | 160  | Short-BLUF         | 1619 |
| 399 | <i>Thiovulum</i> sp. ES                                               | P(e)    | J0L733 | WP_008350312.1             | 143  | Short-BLUF         | 1620 |
|     |                                                                       |         | J1FAS2 | WP_008350313.1             | 143  | Short-BLUF         | 1621 |
| 400 | <i>zeta proteobacterium</i> SCGC AB-137-C09                           | P(ζ)    |        | WP_018281521.1             | 291  | BLUF+PsiE          | 1622 |
| 401 | candidate division TG3 bacterium ACh1                                 | Unc     |        | WP_022635648.1             | 141  | Short-BLUF         | 1623 |
| 402 | uncultured bacterium                                                  | Unc     | K2GM21 | EKE24165.1                 | 122  | Short-BLUF         | 1624 |
| 403 | uncultured bacterium 581                                              | PUnc    | Q6SFE3 | AAR38275.1/WP_007234700.1  | 159  | Short-BLUF         | 1625 |
| 404 | uncultured proteobacterium delRiverFos06H03                           | PUnc    | Q58PP1 | AAX48191.1                 | 147  | Short-BLUF         | 1626 |
| 405 | uncultured proteobacterium.                                           | PUnc    | Q8KZ47 | AAM48626.1                 | 146  | Short-BLUF         | 1627 |
| 406 | <i>Cyanothece</i> sp. PCC 7425 / ATCC 29141                           | Cya     | B8HWP0 | YP_002484827.1             | 145  | Short-BLUF         | 1628 |
| 407 | <i>Halotheca</i> sp. PCC 7418 ( <i>Synechococcus</i> sp. PCC 7418)    | Cya     | K9YCI0 | YP_007168017.1             | 163  | Short-BLUF         | 1629 |
| 408 | <i>Oscillatoria acuminata</i> PCC 6304                                | Cya     | K9TLZ5 | YP_007087096.1             | 366  | BLUF+GGDEF         | 1630 |
| 409 | <i>Pseudanabaena biceps</i> PCC 7429                                  | Cya     | L8MTI5 | WP_009629186.1             | 370  | BLUF+GGDEF         | 1631 |
| 410 | <i>Synechococcus</i> sp. (strain ATCC 27167 / PCC 6312)               | Cya     | K9RSY2 | YP_007060755.1             | 141  | Short-BLUF         | 1632 |
|     | <i>Synechococcus</i> sp. PCC 7002                                     | Cya     | B1XJZ3 | YP_001734377.1             | 145  | Short-BLUF         | 1633 |
|     | <i>Synechococcus</i> sp. PCC 7502                                     | Cya     | K9SXI7 | YP_007106786.1             | 153  | Short-BLUF         | 1634 |
| 411 | <i>Synechocystis</i> sp. PCC 6803                                     | Cya     | L8AQ59 | NP_441709.1                | 150  | Short-BLUF         | 1635 |
|     |                                                                       |         | F7UR00 | BAK50562.1/YP_005651767.1  | 150  | Short-BLUF         | 1636 |



|     |                                                 |      |        |                            |     |            |      |
|-----|-------------------------------------------------|------|--------|----------------------------|-----|------------|------|
|     |                                                 |      | P74295 | YP_005651767.1/NP_441709.1 | 150 | Short-BLUF | 1637 |
|     | <i>Synechocystis</i> sp. PCC 6803 substr. GT-I  | Cya  | H0NXE6 | YP_005383576.1             | 150 | Short-BLUF | 1638 |
|     | <i>Synechocystis</i> sp. PCC 6803 substr. PCC-N | Cya  | H0P9U8 | YP_005409452.1             | 150 | Short-BLUF | 1639 |
|     | <i>Synechocystis</i> sp. PCC 6803 substr. PCC-P | Cya  | H0PNV0 | YP_005386745.1             | 150 | Short-BLUF | 1640 |
| 412 | <i>Thermosynechococcus elongatus</i>            | Cya  | Q8DMN3 | NP_680869.1                | 143 | Short-BLUF | 1641 |
| 413 | <i>Rhodopirellula baltica</i>                   | PI   | Q7UXU1 | NP_864233.1                | 141 | Short-BLUF | 1642 |
|     | <i>Rhodopirellula baltica</i> WH47              | PI   | F2AXT1 | WP_007328441.1             | 132 | Short-BLUF | 1643 |
| 414 | <i>Rhodopirellula europaea</i> SH398            | PI   | M5S3C7 | WP_008667793.1             | 141 | Short-BLUF | 1644 |
| 415 | <i>Rhodopirellula sallentina</i> SM41           | PI   | M5U559 | WP_008676976.1             | 166 | Short-BLUF | 1645 |
|     | <i>Rhodopirellula</i> sp. SWK7                  | PI   | M5SVB2 | WP_009104720.1             | 154 | Short-BLUF | 1646 |
|     |                                                 |      | M5TST8 | WP_009093809.1             | 184 | Short-BLUF | 1647 |
| 416 | <i>Candidatus Nitrospira defluvii</i>           | Nit  | D8PAY1 | YP_003796316.1             | 138 | Short-BLUF | 1648 |
| 417 | <i>Bdellovibrio bacteriovorus</i>               | Bact | Q6MPS8 | NP_967726.1                | 142 | Short-BLUF | 1649 |
| 418 | <i>Cellulophaga algicola</i> DSM 14237          | Bact | E6X5L6 | YP_004163880.1             | 144 | Short-BLUF | 1650 |
| 419 | <i>Cesiribacter andamanensis</i> AMV16          | Bact | M7N429 | WP_009196222.1             | 143 | Short-BLUF | 1651 |
| 420 | <i>Chloroherpeton thalassium</i> ATCC 35110     | Bact | B3QX03 | YP_001997260.1             | 145 | Short-BLUF | 1652 |
| 421 | <i>Cytophagales</i> str. B6                     | Bact |        | WP_022830361.1             | 140 | Short-BLUF | 1653 |
| 422 | <i>Dokdonia donghaensis</i> MED134              | Bact | A2TPW0 | EAQ40501.1                 | 135 | Short-BLUF | 1654 |
| 423 | <i>Eudoraea adriatica</i>                       | Bact |        | WP_019668996.1             | 146 | Short-BLUF | 1655 |
| 424 | <i>Fibrella aestuarina</i> BUZ 2                | Bact | I0KAE1 | YP_007321687.1             | 143 | Short-BLUF | 1656 |
| 425 | <i>Fibrisoma limi</i> BUZ 3                     | Bact | I2GNV8 | WP_009284154.1             | 229 | Short-BLUF | 1657 |
| 426 | <i>Flavobacteria bacterium</i> BBFL7.           | Bact | Q26D86 | WP_006795753.1             | 139 | Short-BLUF | 1658 |
| 427 | <i>Flavobacteriaceae bacterium</i> P7-3-5       | Bact |        | WP_019387910.1             | 136 | Short-BLUF | 1659 |
| 428 | <i>Formosa agariphila</i> KMM 3901              | Bact |        | CDF79453.1                 | 144 | Short-BLUF | 1660 |
| 429 | <i>Fulvivirga imtechensis</i> AK7               | Bact | L8JX15 | WP_009577900.1             | 139 | Short-BLUF | 1661 |
| 430 | <i>Gillisia limnaea</i> DSM 15749               | Bact | H2BX58 | WP_006988327.1             | 134 | Short-BLUF | 1662 |
|     |                                                 |      | H2BW61 | WP_006989286.1             | 133 | Short-BLUF | 1663 |
|     |                                                 |      | H2BVP6 | WP_006990305.1             | 135 | Short-BLUF | 1664 |
|     |                                                 |      | H2BX59 | WP_006988328.1             | 135 | Short-BLUF | 1665 |
| 431 | <i>Gramella forsetii</i> KT0803                 | Bact | A0LYB8 | YP_860431.1                | 133 | Short-BLUF | 1666 |
| 432 | <i>Hymenobacter aerophilus</i>                  | Bact |        | WP_019949502.1             | 139 | Short-BLUF | 1667 |
|     |                                                 |      |        | WP_019946446.1             | 145 | Short-BLUF | 1668 |
|     |                                                 |      |        | WP_019946896.1             | 145 | Short-BLUF | 1669 |
| 433 | <i>Hymenobacter norwichensis</i>                | Bact |        | WP_022823388.1             | 142 | Short-BLUF | 1670 |
|     |                                                 |      |        | WP_022823740.1             | 153 | Short-BLUF | 1671 |
|     |                                                 |      |        | WP_022821755.1             | 146 | Short-BLUF | 1672 |
| 434 | <i>Krokinobacter</i> sp. (strain 4H-3-7-5)      | Bact | F4B036 | YP_004431557.1             | 137 | Short-BLUF | 1673 |
|     |                                                 |      | F4B057 | YP_004431578.1             | 151 | Short-BLUF | 1674 |
| 435 | <i>Marivirga tractuosa</i> ATCC 23168           | Bact | E4TNQ3 | YP_004053598.1             | 139 | Short-BLUF | 1675 |
| 436 | <i>Mesoflavibacter zeaxanthinifaciens</i>       | Bact |        | WP_010517271.1             | 142 | Short-BLUF | 1676 |
| 437 | <i>Microscilla marina</i> ATCC 23134            | Bact | A1ZRF7 | WP_004156404.1             | 137 | Short-BLUF | 1677 |
| 438 | <i>Mucilaginibacter paludis</i> DSM 18603       | Bact | H1Y0M8 | WP_008509682.1             | 140 | Short-BLUF | 1678 |
|     |                                                 |      | H1YF64 | WP_008506222.1             | 151 | Short-BLUF | 1679 |
|     |                                                 |      | H1Y0M7 | WP_008509681.1             | 137 | Short-BLUF | 1680 |
|     |                                                 |      | H1Y8V0 | WP_008509607.1             | 151 | Short-BLUF | 1681 |
| 439 | <i>Nafulsella turpanensis</i>                   | Bact |        | WP_017730115.1             | 142 | Short-BLUF | 1682 |
| 440 | <i>Pedobacter</i> sp. BAL39                     | Bact | A6E9F4 | WP_008239021.1             | 152 | Short-BLUF | 1683 |
| 440 | <i>Polaribacter dokdonensis</i> MED152          | Bact | A2TY78 | YP_007671791.1             | 481 | HTH-BLUF   | 1684 |
| 440 | <i>Psychroflexus gondwanensis</i> ACAM 44       | Bact | N1WKU3 | WP_003440963.1             | 142 | Short-BLUF | 1685 |
| 440 | <i>Psychroflexus torquis</i> ATCC 700755        | Bact | K4IV57 | YP_006868110.1             | 142 | Short-BLUF | 1686 |
| 440 | <i>Segetibacter koreensis</i>                   | Bact |        | WP_018614590.1             | 151 | Short-BLUF | 1687 |
| 440 | <i>Spirosoma linguale</i> DSM 74                | Bact | D2QRB5 | YP_003388468.1             | 142 | Short-BLUF | 1688 |
|     |                                                 |      | D2QVZ0 | YP_003391771.1             | 137 | Short-BLUF | 1689 |



|     |                                                                    |               |        |                |     |            |      |
|-----|--------------------------------------------------------------------|---------------|--------|----------------|-----|------------|------|
| 441 | <i>Spirosoma spitsbergense</i>                                     | <b>Bact</b>   |        | WP_020603065.1 | 152 | Short-BLUF | 1690 |
|     | <i>Spirosoma spitsbergense</i>                                     | <b>Bact</b>   |        | WP_020601880.1 | 152 | Short-BLUF | 1691 |
| 442 | <i>Terriglobus saanensis</i> ATCC BAA-1853                         | <b>Bact</b>   | E8UXB9 | YP_004184137.1 | 153 | Short-BLUF | 1692 |
| 443 | <i>unidentified eubacterium</i> SCB49                              | <b>Bact</b>   | A6ENE1 | EDM45157.1     | 133 | Short-BLUF | 1693 |
| 444 | <i>Winogradskyella psychrotolerans</i>                             | <b>Bact</b>   |        | WP_020894508.1 | 136 | Short-BLUF | 1694 |
| 445 | <i>Zobellia galactanivorans</i> DSM 12802                          | <b>Bact</b>   | G0L2R9 | YP_004735541.1 | 145 | Short-BLUF | 1695 |
|     |                                                                    |               | G0KZL8 | YP_004737334.1 | 147 | Short-BLUF | 1696 |
| 446 | <i>Zunongwangia profunda</i> SM-A87                                | <b>Bact</b>   | D5BH98 | YP_003583468.1 | 133 | Short-BLUF | 1697 |
| 447 | <i>Solibacter usitatus</i> Ellin6076                               | <b>AcidoB</b> | Q01S10 | YP_827845.1    | 141 | Short-BLUF | 1698 |
| 448 | <i>Lentisphaera araneosa</i> HTCC2155                              | <b>Lent</b>   | A6DQ35 | WP_007279966.1 | 132 | Short-BLUF | 1699 |
| 449 | <i>Chthoniobacter flavus</i> Ellin428                              | <b>Verr</b>   | B4D369 | WP_006980682.1 | 157 | Short-BLUF | 1700 |
| 450 | <i>Coralimargarita akajimensis</i> DSM 45221                       | <b>Verr</b>   | D5EM63 | YP_003549393.1 | 148 | Short-BLUF | 1701 |
| 451 | <i>Verrucomicrobiae bacterium</i> DG1235                           | <b>Verr</b>   | B5JMC0 | WP_008104971.1 | 141 | Short-BLUF | 1702 |
|     |                                                                    |               | B5JJ76 | WP_008103776.1 | 157 | Short-BLUF | 1703 |
| 452 | <i>Leptonema illini</i> DSM 21528                                  | <b>Spi</b>    | H2CIX2 | WP_002774553.1 | 261 | BLUF+GAF ? | 1704 |
| 453 | <i>Turneriella parva</i> ( <i>Leptospira parva</i> ) ATCC BAA-1111 | <b>Spi</b>    | I4B432 | YP_006439545.1 | 353 | BLUF+GGDEF | 1705 |
