# Supplementary material for: From Plant Infectivity to Growth Patterns: The Role of Blue-Light Sensing in the Prokaryotic World
Source: MDPI journal article supplement (doi:10.3390/plants3010070), 2014-01-27
Supplement: s1 [file s1]

**S4: a. Domain abbreviations** (according to Interpro: N. J. Mulder, R. Apweiler, T. K. Attwood, A. Bairoch, D. Barrel, A. Bateman, M. Biswas, P. Bradley, P. Bucher, R. R. Copley, E. Courcelle, U. Das, R. Durbin, L. Falquet, W. Fleischmann, S. Griffiths-Jones, D. Haft, N. Harte, N. Hulo, D. Kahn, A. Kanapin, M. Krestyaninova, R. Lopez, I. Letunic, D. Lonsdale, V. Silventoinen, S. E. Orchard, M. Pagni, D. Peyruc, C. P. Ponting, J. Selengut, F. Servant, C. J. Sigrist, R. Vaughan and E. M. Zdobnov, The InterPro Database, 2003 brings increased coverage and new features., Nucl. Acids Res., 2003, 31, 315-318.

|                |                                                                                                     |
|----------------|-----------------------------------------------------------------------------------------------------|
| <b>BLUF</b>    | Blue Light sensing Using Flavin domain                                                              |
| <b>CHASE</b>   | Cyclases/Histidine kinases Associated Sensory Extracellular                                         |
| <b>CHEB</b>    | CHEB-type response regulator                                                                        |
| <b>CHER</b>    | CHER-type S-adenosylmethionine-dependent methyltransferase                                          |
| <b>Cyclase</b> | Adenylyl cyclase class-3/4/guanylyl cyclase                                                         |
| <b>DICT</b>    | Domain associated with diguanylate Cyclases and phosphodiesterases                                  |
| <b>EAL</b>     | Diguanylate phosphodiesterase named after conserved amino acids                                     |
| <b>GAF</b>     | cGMP-specific phosphodiesterases, cyanobacterial adenylate cyclases, and formate hydrogen lyase tra |
| <b>GGDEF</b>   | Diguanylate cyclase named after conserved amino acids                                               |
| <b>Hamp</b>    | linker domain in Histidine kinases, Adenyl cyclases, Methyl-accepting proteins and Phosphatases     |
| <b>Hpt</b>     | histidine phosphotransfer domain                                                                    |
| <b>HTH</b>     | Helix Turn Helix/DNA binding domain                                                                 |
| <b>Kinase</b>  | Hitidine kinase domain                                                                              |
| <b>LOV</b>     | Light Oxygen and Voltage domain, PAS subfamily; here sensors of blue light                          |
| <b>MASE1</b>   | Predicted integral membrane sensory domain found bacterial signaling proteins                       |
| <b>MCP</b>     | Methyl-accepting chemotaxis proteins                                                                |
| <b>PAS</b>     | Per Arnt Sim domain                                                                                 |
| <b>PsiE</b>    | Phosphate-starvation-induced PsiE-like                                                              |
| <b>RR</b>      | CheY-type Response regulator, receiver domain                                                       |
| <b>SCHIC</b>   | Sensor containing heme instead of cobalamin                                                         |
| <b>SPOIIE</b>  | Sporulation stage II, protein E C-terminal/Protein phosphatase 2C-related                           |
| <b>STAS</b>    | Sulphate Transporter and AntiSigma factor antagonist                                                |
| <b>TETR</b>    | Tetracycline transcriptional regulator                                                              |

#### S4. b. Abbreviations for phyla

|                    |                                              |
|--------------------|----------------------------------------------|
| F                  | Firmicutes                                   |
| Ac                 | Actinobacteria                               |
| P( $\alpha$ )      | $\alpha$ -proteobacteria>Caulobacteriales    |
| P( $\alpha$ )      | $\alpha$ -proteobacteria>Parvularculales     |
| P( $\alpha$ )      | $\alpha$ -proteobacteria>Rhizobiales         |
| P( $\alpha$ )      | $\alpha$ -proteobacteria>Rhodobacterales     |
| P( $\alpha$ )      | $\alpha$ -proteobacteria>Rhodospirillales    |
| P( $\alpha$ )      | $\alpha$ -proteobacteria>Sphingomonadales    |
| P( $\alpha$ ) U    | $\alpha$ -proteobacteria>Uncultured          |
| P( $\alpha$ ) poly | $\alpha$ -proteobacteria>Polymorphum         |
| P( $\beta$ )       | $\beta$ -proteobacteria>Burkholderiales      |
| P( $\beta$ )       | $\beta$ -proteobacteria>Gallionellales       |
| P( $\beta$ )       | $\beta$ -proteobacteria>Methylophilales      |
| P( $\beta$ )       | $\beta$ -proteobacteria>Neisseriales         |
| P( $\beta$ )       | $\beta$ -proteobacteria>Nitrosomonadales     |
| P( $\beta$ )       | $\beta$ -proteobacteria>Rhodocyclales        |
| P( $\beta$ ) U     | $\beta$ -proteobacteria>Uncultured           |
| P( $\gamma$ )      | $\gamma$ -proteobacteria>Acidithiobacillales |
| P( $\gamma$ )      | $\gamma$ -proteobacteria>Alteromonadales     |
| P( $\gamma$ )      | $\gamma$ -proteobacteria>Chromatiales        |
| P( $\gamma$ )      | $\gamma$ -proteobacteria>Enterobacteriales   |
| P( $\gamma$ )      | $\gamma$ -proteobacteria>Legionellales       |
| P( $\gamma$ )      | $\gamma$ -proteobacteria>Methylococcales     |
| P( $\gamma$ )      | $\gamma$ -proteobacteria>Oceanospirillales   |
| P( $\gamma$ )      | $\gamma$ -proteobacteria>Pseudomonadales     |
| P( $\gamma$ ) Rei  | $\gamma$ -proteobacteria>Reinekea            |
| P( $\gamma$ )      | $\gamma$ -proteobacteria>Salinisphaerales    |

|                 |                                          |
|-----------------|------------------------------------------|
| P( $\gamma$ )   | $\gamma$ -proteobacteria>Thiotrichales   |
| P( $\gamma$ )U  | $\gamma$ -proteobacteria>Uncultured      |
| P( $\gamma$ )   | $\gamma$ -proteobacteria>Vibrionales     |
| P( $\gamma$ )   | $\gamma$ -proteobacteria>Xanthomonadales |
| P( $\delta$ )   | $\delta$ -proteobacteria                 |
| P( $\epsilon$ ) | $\epsilon$ -proteobacteria               |
| P(Magn)         | Proteobacteria>Magnetococcales           |
| Chl             | Chloroflexi                              |
| Cya             | Cyanobacteria>Chroococcales              |
| Cya             | Cyanobacteria>Gloeobacteria              |
| Cya             | Cyanobacteria>Nostocales                 |
| Cya             | Cyanobacteria> Oscillatoriales           |
| Pl              | Planctomycetes                           |
| Nit             | Nitrospirae                              |
| Acido           | Acidobacteria                            |
| Bact/Ch         | Bacteroidetes/Chlorobi                   |
| DeTh            | Deinococcus-Thermus                      |
| Lent            | Lentisphaerae                            |
| Verr            | Verrucomicrobia                          |
| Spi             | Spirochaetes                             |
| EuA             | Euryarchaeota                            |
