# Supplementary material for: From Plant Infectivity to Growth Patterns: The Role of Blue-Light Sensing in the Prokaryotic World
Source: MDPI journal article supplement (doi:10.3390/plants3010070), 2014-01-27
Supplement: s1 [file s1]

**Bacterial LOV domains** In yellow: species/strain also possessing BLUF domains (see S2)

| Nr. | Species/strain                                                         | Group | Accession nr. Uniprot | Accession nr. NCBI            | aa nr. | Domains       | Prot. Nr. |
|-----|------------------------------------------------------------------------|-------|-----------------------|-------------------------------|--------|---------------|-----------|
| 1   | <i>Amphibacillus jiliniensis</i>                                       | F     |                       | WP_017473228.1                | 262    | LOV+STAS      | 1         |
| 2   | <i>Aneurinibacillus aneurinilyticus</i>                                | F     |                       | WP_021620417.1                | 491    | PAS+LOV+SPOIE | 2         |
| 3   | <i>Bacillus amyloliquefaciens</i>                                      | F     |                       | WP_017418405.1                | 276    | LOV+STAS      | 3         |
|     | <i>Bacillus amyloliquefaciens</i> ATCC 23350                           | F     | E1UNE3                | YP_003921412.1                | 261    | LOV+STAS      | 4         |
|     | <i>Bacillus amyloliquefaciens</i> CAU-B946                             | F     | H2ABK8                | YP_005131472.1                | 261    | LOV+STAS      | 5         |
|     | <i>Bacillus amyloliquefaciens</i> FZB42                                | F     | A7Z7V9                | YP_001422316.1                | 261    | LOV+STAS      | 6         |
| 4   | <i>Bacillus amyloliquefaciens</i> subsp. <i>plantarum</i> AS43.3       | F     | L0BRW8                | YP_007187501.1                | 261    | LOV+STAS      | 7         |
|     | <i>Bacillus amyloliquefaciens</i> subsp. <i>plantarum</i> NAU-B3       | F     |                       | CDH96675.1                    | 261    | LOV+STAS      | 8         |
|     | <i>Bacillus amyloliquefaciens</i> subsp. <i>plantarum</i> UCMB5033     | F     | S6G2H0                | YP_008413843.1                | 276    | LOV+STAS      | 9         |
|     | <i>Bacillus amyloliquefaciens</i> subsp. <i>plantarum</i> UCMB5036     | F     | M1XEM3                | YP_007498348.1                | 261    | LOV+STAS      | 10        |
|     | <i>Bacillus amyloliquefaciens</i> subsp. <i>plantarum</i> UCMB5113     | F     | S6FTN1                | YP_008422089.1                | 276    | LOV+STAS      | 11        |
|     | <i>Bacillus amyloliquefaciens</i> subsp. <i>plantarum</i> YAU B9601-Y2 | F     | H8XFK1                | YP_005422280.1                | 276    | LOV+STAS      | 12        |
|     | <i>Bacillus amyloliquefaciens</i> TA208                                | F     | F4E8V5                | YP_005542621.1/YP_003921412.1 | 261    | LOV+STAS      | 13        |
|     | <i>Bacillus amyloliquefaciens</i> XH7                                  | F     | G0IGZ5                | YP_005551014.1/YP_003921412.1 | 261    | LOV+STAS      | 14        |
|     | <i>Bacillus amyloliquefaciens</i> ( <i>Bacillus velezensis</i> )       | F     | F4EJR7                | YP_005546869.1/YP_003921412.1 | 261    | LOV+STAS      | 15        |
| 5   | <i>Bacillus atrophaeus</i>                                             | F     | R0MMM0                | WP_010789563.1                | 273    | LOV+STAS      | 16        |
|     | <i>Bacillus atrophaeus</i> str. 1942                                   | F     | E3E2E8                | YP_003974446.1                | 263    | LOV+STAS      | 17        |
| 6   | <i>Bacillus endophyticus</i>                                           | F     |                       | WP_019392897.1                | 259    | LOV+STAS      | 18        |
| 7   | <i>Bacillus macauensis</i> ZFHKF-1                                     | F     | I8AIW7                | WP_007201639.1                | 263    | LOV+STAS      | 19        |
| 8   | <i>Bacillus megaterium</i>                                             | F     |                       | WP_016764751.1                | 260    | LOV+STAS      | 20        |
|     | <i>Bacillus megaterium</i> ATCC 12872                                  | F     | D5DX18                | YP_003563516.1                | 260    | LOV+STAS      | 21        |
|     | <i>Bacillus megaterium</i> DSM 319                                     | F     | D5DGT4                | YP_003598275.1                | 214    | LOV+STAS      | 22        |
|     | <i>Bacillus megaterium</i> WSH-002                                     | F     | G2RIW6                | YP_005494307.1                | 260    | LOV+STAS      | 23        |
| 9   | <i>Bacillus mojavensis</i>                                             | F     |                       | WP_010331556.1                | 261    | LOV+STAS      | 24        |
| 10  | <i>Bacillus pumilus</i>                                                | F     |                       | WP_019743696.1                | 267    | LOV+STAS      | 25        |
|     |                                                                        |       |                       | WP_017367889.1                | 267    | LOV+STAS      | 26        |
|     |                                                                        |       |                       | WP_019743575.1                | 262    | LOV+STAS      | 27        |
|     |                                                                        |       |                       | WP_017368190.1                | 262    | LOV+STAS      | 28        |
|     | <i>Bacillus pumilus</i> ATCC 7061                                      | F     | B4ANP6                | WP_003217570.1                | 267    | LOV+STAS      | 29        |
|     |                                                                        |       | B4AJ24                | WP_003214834.1/YP_001488493.1 | 262    | LOV+STAS      | 30        |
|     | <i>Bacillus pumilus</i> SAFR-032                                       | F     | A8FGG2                | YP_001487889.1                | 267    | LOV+STAS      | 31        |
|     |                                                                        |       | A8FI66                | YP_001488493.1                | 262    | LOV+STAS      | 32        |
| 11  | <i>Bacillus selenitireducens</i> ATCC 700615                           | F     | D6XXH5                | YP_003698598.1                | 256    | LOV+STAS      | 33        |
| 12  | <i>Bacillus siamensis</i>                                              | F     |                       | WP_016938511.1                | 261    | LOV+STAS      | 34        |
| 13  | <i>Bacillus</i> sp. 5B6                                                | F     | I2HUE6                | WP_007613218.1                | 261    | LOV+STAS      | 35        |
| 14  | <i>Bacillus</i> sp. HYC-10                                             | F     | K2NQI4                | WP_008354841.1                | 262    | LOV+STAS      | 36        |
|     |                                                                        |       | K2NB57                | WP_008356458.1                | 279    | LOV+STAS      | 37        |
| 15  | <i>Bacillus</i> sp. JS                                                 | F     | I0F7W3                | YP_006232825.1                | 261    | LOV+STAS      | 38        |
| 16  | <i>Bacillus</i> sp. M 2-6                                              | F     | I4VFF5                | WP_008343003.1                | 267    | LOV+STAS      | 39        |
|     |                                                                        |       | I4VEQ1                | WP_008343295.1                | 262    | LOV+STAS      | 40        |
| 17  | <i>Bacillus stratosphericus</i> LAMA 585                               | F     | M5RFF6                | WP_007501884.1                | 267    | LOV+STAS      | 41        |
|     |                                                                        |       | M5R3V3                | WP_007497556.1                | 262    | LOV+STAS      | 42        |
| 18  | <i>Bacillus subtilis</i>                                               | F     |                       | WP_019259236.1                | 261    | LOV+STAS      | 43        |
|     |                                                                        |       |                       | WP_019715441.1                | 261    | LOV+STAS      | 44        |
|     | <i>Bacillus subtilis</i> BSn5                                          | F     | E8VHV4                | YP_004204857.1                | 261    | LOV+STAS      | 45        |
| 19  | <i>Bacillus subtilis</i> subsp. <i>inaquosorum</i> KCTC 13429          | F     | L8Q4F3                | WP_003238003.1                | 261    | LOV+STAS      | 46        |
| 20  | <i>Bacillus subtilis</i> subsp. <i>natto</i> BEST195                   | F     | D4G0B4                | YP_005562248.1                | 261    | LOV+STAS      | 47        |
| 21  | <i>Bacillus subtilis</i> subsp. <i>spizizenii</i> ATCC 23059           | F     | E0TXF2                | YP_003867287.1                | 261    | LOV+STAS      | 48        |
|     | <i>Bacillus subtilis</i> subsp. <i>spizizenii</i> ATCC 6633            | F     | D5N263                | WP_003223298.1/YP_003867287.1 | 261    | LOV+STAS      | 49        |

|    |                                                           |   |             |                               |     |                       |     |
|----|-----------------------------------------------------------|---|-------------|-------------------------------|-----|-----------------------|-----|
|    | <i>Bacillus subtilis</i> subsp. <i>spizizenii</i> TU-B-10 | F | G4NZQ8      | YP_004878519.1                | 261 | LOV+STAS              | 50  |
| 22 | <i>Bacillus subtilis</i> subsp. <i>subtilis</i> RO-NN-1   | F | G4P3K6      | YP_005558004.1                | 261 | LOV+STAS              | 51  |
|    | <i>Bacillus subtilis</i> subsp. <i>subtilis</i> str. 168  | F | O34627-YtvA | NP_390912.1                   | 261 | LOV+STAS              | 52  |
|    | <i>Bacillus subtilis</i> subsp. <i>subtilis</i> str. BSP1 | F | L0D031      | YP_007208463.1                | 261 | LOV+STAS              | 53  |
|    | <i>Bacillus subtilis</i> subsp. <i>subtilis</i> str. SC-8 | F | G4ES72      | WP_003229169.1                | 261 | LOV+STAS              | 54  |
|    | <i>Bacillus subtilis</i> XF-1                             | F | M4KWC9      | YP_007427967.1                | 261 | LOV+STAS              | 55  |
| 23 | <i>Bacillus vallismortis</i>                              | F |             | WP_010329536.1                | 261 | LOV+STAS              | 56  |
| 24 | <i>Bhargavaea cecembensis</i> DSE10                       | F | M7NUV9      | WP_008300509.1                | 259 | LOV+STAS              | 57  |
| 25 | <i>Clostridium tyrobutyricum</i>                          | F |             | WP_017750870.1                | 666 | PAS+LOV+PAS+Kinase+RR | 58  |
| 26 | <i>Halobacillus halophilus</i> ATCC 35676                 | F | I0JHP4      | YP_006178939.1                | 266 | LOV+STAS              | 59  |
| 27 | <i>Halobacillus</i> sp. BAB-2008                          | F | L5N866      | WP_008636934.1                | 268 | LOV+STAS              | 60  |
| 28 | <i>Listeria grayi</i> DSM 20601                           | F | D7UXG5      | WP_003758096.1                | 257 | LOV+STAS              | 61  |
| 29 | <i>Listeria innocua</i> ATCC 33091                        | F | H1GBU2      | WP_003770995.1                | 266 | LOV+STAS              | 62  |
|    | <i>Listeria innocua</i> Clip11262                         | F | Q92DM1      | NP_470134.1                   | 253 | LOV+STAS              | 63  |
|    | <i>Listeria innocua</i> FSL J1-023                        | F | E3Z5Q4      | WP_003765959.1                | 253 | LOV+STAS              | 64  |
|    | <i>Listeria innocua</i> FSL S4-378                        | F | E3YX19      | WP_003761128.1/NP_470134.1    | 253 | LOV+STAS              | 65  |
| 30 | <i>Listeria ivanovii</i> ATCC BAA-678                     | F | G2ZDA1      | YP_004854533.1                | 253 | LOV+STAS              | 66  |
| 31 | <i>Listeria marthii</i> FSL S4-120                        | F | E3YNA7      | WP_008947200.1                | 253 | LOV+STAS              | 67  |
| 32 | <i>Listeria monocytogenes</i>                             | F | L8DRI2      | NP_464326.1                   | 253 | LOV+STAS              | 68  |
|    | <i>Listeria monocytogenes</i> 07PF0776                    | F | I0CPV0      | YP_013419.1                   | 253 | LOV+STAS              | 69  |
|    | <i>Listeria monocytogenes</i> 10403S                      | F | G2K4H2      | YP_005961931.1/NP_464326.1    | 253 | LOV+STAS              | 70  |
|    | <i>Listeria monocytogenes</i> 4b H7858                    | F | Q4EEF6      | WP_003726661.1/YP_013419.1    | 253 | LOV+STAS              | 71  |
|    | <i>Listeria monocytogenes</i> ATCC 19117                  | F | J7PNH7      | YP_013419.1                   | 253 | LOV+STAS              | 72  |
|    | <i>Listeria monocytogenes</i> EGD-e                       | F | P58724      | NP_464326.1                   | 253 | LOV+STAS              | 73  |
|    | <i>Listeria monocytogenes</i> F2365                       | F | Q722B8      | YP_013419.1                   | 253 | LOV+STAS              | 74  |
|    | <i>Listeria monocytogenes</i> F6854                       | F | Q4EN15      | EAL05103.1/NP_464326.1        | 253 | LOV+STAS              | 75  |
|    | <i>Listeria monocytogenes</i> F6900                       | F | C8KA37      | EEW21003.1/NP_464326.1        | 253 | LOV+STAS              | 76  |
|    | <i>Listeria monocytogenes</i> Finland 1998                | F | G2KIU9      | YP_005970621.1/NP_464326.1    | 253 | LOV+STAS              | 77  |
|    | <i>Listeria monocytogenes</i> FSL F2-208                  | F | E3YE39      | WP_003735967.1                | 253 | LOV+STAS              | 78  |
|    | <i>Listeria monocytogenes</i> FSL J1-194                  | F | D4PI54      | WP_003726937.1/YP_013419.1    | 253 | LOV+STAS              | 79  |
|    | <i>Listeria monocytogenes</i> FSL J1-208                  | F | H7CIX6      | WP_003738433.1                | 253 | LOV+STAS              | 80  |
|    | <i>Listeria monocytogenes</i> FSL J2-071                  | F | D3KP16      | EFD90245.1/YP_002350789.1     | 253 | LOV+STAS              | 81  |
|    | <i>Listeria monocytogenes</i> FSL N1-017                  | F | D7UJQ9      | EFK41291.1/YP_013419.1        | 253 | LOV+STAS              | 82  |
|    | <i>Listeria monocytogenes</i> FSL N3-165                  | F | C8JWU1      | EEW14621.1/NP_464326.1        | 253 | LOV+STAS              | 83  |
|    | <i>Listeria monocytogenes</i> FSL R2-503                  | F | C8K567      | EEW19771.1/YP_013419.1        | 253 | LOV+STAS              | 84  |
|    | <i>Listeria monocytogenes</i> FSL R2-561                  | F | G2K6K4      | YP_005967717.1/NP_464326.1    | 253 | LOV+STAS              | 85  |
|    | <i>Listeria monocytogenes</i> HPB2262                     | F | D4Q0W9      | EFF94760.1/YP_013419.1        | 253 | LOV+STAS              | 86  |
|    | <i>Listeria monocytogenes</i> J0161                       | F | G2JVW6      | YP_005964793.1/NP_464326.1    | 253 | LOV+STAS              | 87  |
|    | <i>Listeria monocytogenes</i> J1-220                      | F | F3RIF4      | YP_008289002.1/YP_013419.1    | 253 | LOV+STAS              | 88  |
|    | <i>Listeria monocytogenes</i> J1816                       | F | F3RC23      | YP_008285930.1/YP_013419.1    | 253 | LOV+STAS              | 89  |
|    | <i>Listeria monocytogenes</i> J2818                       | F | D4PRY3      | EFF97759.1/NP_464326.1        | 253 | LOV+STAS              | 90  |
|    | <i>Listeria monocytogenes</i> L312                        | F | J7P482      | YP_013419.1                   | 253 | LOV+STAS              | 91  |
|    | <i>Listeria monocytogenes</i> N53-1                       | F | L8E287      | NP_464326.1                   | 253 | LOV+STAS              | 92  |
| 33 | <i>Listeria monocytogenes</i> serotype 1/2a 08-5578       | F | D2P049      | YP_003412995.1/NP_464326.1    | 253 | LOV+STAS              | 93  |
|    | <i>Listeria monocytogenes</i> serotype 1/2a 08-5923       | F | D2PB38      | YP_003416040.1/NP_464326.1    | 253 | LOV+STAS              | 94  |
| 34 | <i>Listeria monocytogenes</i> serotype 4a HCC23           | F | B8DGG7      | YP_002350789.1                | 253 | LOV+STAS              | 95  |
|    | <i>Listeria monocytogenes</i> serotype 4a M7              | F | F8BE06      | YP_005946888.1/YP_002350789.1 | 253 | LOV+STAS              | 96  |
| 35 | <i>Listeria monocytogenes</i> serotype 4b Clip81459       | F | C1L168      | YP_002757524.1/YP_013419.1    | 252 | LOV+STAS              | 97  |
|    | <i>Listeria monocytogenes</i> serotype 4b str. LL195      | F | K8FAX5      | YP_007014391.1                | 302 | LOV+STAS              | 98  |
| 36 | <i>Listeria monocytogenes</i> serotype 4c L99             | F | E1UEF6      | YP_005925797.1/YP_002350789.1 | 253 | LOV+STAS              | 99  |
| 37 | <i>Listeria monocytogenes</i> serotype 7 str. SLCC2482    | F | J7MIR4      | YP_013419.1                   | 253 | LOV+STAS              | 100 |
|    | <i>Listeria monocytogenes</i> SLCC2372                    | F | J7NJ10      | NP_464326.1                   | 253 | LOV+STAS              | 101 |
|    | <i>Listeria monocytogenes</i> SLCC2376                    | F | J7P7Y6      | YP_002350789.1                | 253 | LOV+STAS              | 102 |

|    |                                                     |               |        |                        |     |                    |     |
|----|-----------------------------------------------------|---------------|--------|------------------------|-----|--------------------|-----|
|    | <i>Listeria monocytogenes</i> SLCC2378              | F             | J7P7K7 | YP_013419.1            | 253 | LOV+STAS           | 103 |
|    | <i>Listeria monocytogenes</i> SLCC2479              | F             | J7N224 | NP_464326.1            | 253 | LOV+STAS           | 104 |
|    | <i>Listeria monocytogenes</i> SLCC2540              | F             | J7PFP1 | YP_013419.1            | 253 | LOV+STAS           | 105 |
|    | <i>Listeria monocytogenes</i> SLCC2755              | F             | J7N0R0 | YP_013419.1            | 253 | LOV+STAS           | 106 |
|    | <i>Listeria monocytogenes</i> SLCC5850              | F             | J7MN47 | NP_464326.1            | 253 | LOV+STAS           | 107 |
|    | <i>Listeria monocytogenes</i> SLCC7179              | F             | J7NYX0 | NP_464326.1            | 253 | LOV+STAS           | 108 |
|    | <i>Listeria monocytogenes</i> str. Scott A          | F             | F3YSH3 | EGJ24299.1/YP_013419.1 | 253 | LOV+STAS           | 109 |
| 38 | <i>Listeria seeligeri</i> FSL N1-067                | F             | E3ZND1 | WP_003746290.1         | 266 | LOV+STAS           | 110 |
|    | <i>Listeria seeligeri</i> FSL S4-171                | F             | E3ZX98 | WP_003751585.1         | 253 | LOV+STAS           | 111 |
| 39 | <i>Listeria seeligeri</i> serovar 1/2b ATCC 35967   | F             | D3UL64 | YP_003463935.1         | 253 | LOV+STAS           | 112 |
| 40 | <i>Listeria welshimeri</i> serovar 6b str. SLCC5334 | F             | A0AGP3 | YP_848958.1            | 253 | LOV+STAS           | 113 |
| 41 | <i>Oceanobacillus iheyensis</i> HTE831              | F             | Q8ESN8 | NP_691509.1            | 264 | LOV+STAS           | 114 |
| 42 | <i>Oceanobacillus kimchii</i>                       | F             |        | WP_017795669.1         | 264 | LOV+STAS           | 115 |
| 43 | <i>Paenibacillus fonticola</i>                      | F             |        | WP_019637272.1         | 580 | LOV+GGDEF+EAL      | 116 |
| 44 | <i>Paenibacillus polymyxa</i> (strain E681)         | F             | E0REH5 | YP_003868921.1         | 825 | GAF+LOV+LOV+SPOIIE | 117 |
| 45 | <i>Paenibacillus</i> sp. A9                         | F             |        | WP_017813224.1         | 548 | PAS+LOV+Kinase     | 118 |
| 46 | <i>Paenibacillus</i> sp. PAMC 26794                 | F             |        | WP_017687351.1         | 382 | LOV+Kinase         | 119 |
| 47 | <i>Paenibacillus terrae</i> (strain HPL-003)        | F             | G7W1W6 | YP_005074888.1         | 367 | LOV+Kinase         | 120 |
| 48 | <i>Paenisporosarcina</i> sp. TG-14                  | F             |        | WP_017381979.1         | 730 | LOV+GAF+GGDEF+EAL  | 121 |
| 49 | <i>Paenisporosarcina</i> sp. TG20                   | F             |        | WP_019413525.1         | 735 | LOV+GAF+GGDEF+EAL  | 122 |
| 50 | <i>Planococcus antarcticus</i> DSM 14505            | F             | I4X763 | WP_006829023.1         | 280 | LOV+STAS           | 123 |
| 51 | <i>Planococcus donghaensis</i> MPA1U2               | F             | E7RG70 | WP_008430240.1         | 282 | LOV+STAS           | 124 |
| 52 | <i>Planococcus halocryophilus</i> Or1               | F             | M3F5S5 | WP_008498406.1         | 292 | LOV+STAS           | 125 |
| 53 | <i>Saccharibacillus kuerlensis</i>                  | F             |        | WP_018975129.1         | 385 | LOV+Kinase         | 126 |
| 54 | <i>Salimicrobium</i> sp. MJ3                        | F             | K2GL47 | WP_008591203.1         | 269 | LOV+STAS           | 127 |
| 55 | <i>Virgibacillus halodenitrificans</i>              | F             |        | WP_019378944.1         | 258 | LOV+STAS           | 128 |
| 56 | <i>Virgibacillus</i> sp. CM-4                       | F             | T0JJ18 | WP_021291946.1         | 263 | LOV+STAS           | 129 |
| 57 | <i>Actinomycetospira Chiangmaiensis</i>             | Ac            |        | WP_018335315.1         | 715 | PAS+LOV+GAF+SPOIIE | 130 |
| 58 | <i>Arthrobacter aureus</i> TC1                      | Ac            | A1RDS2 | YP_950384.1            | 727 | LOV+ GGDEF+EAL     | 131 |
| 59 | <i>Arthrobacter</i> sp. TB 23                       | Ac            |        | WP_019481926.1         | 681 | LOV+GGDEF+EAL      | 132 |
| 60 | <i>Beutenbergia cavernae</i> DSM 12333              | Ac            | C5BXY5 | YP_002880641.1         | 580 | LOV+GAF+SPOIIE     | 133 |
| 61 | <i>Blastococcus saxosidens</i> DD2                  | Ac            | H6RWC2 | YP_005329368.1         | 762 | LOV+GGDEF+EAL      | 134 |
| 62 | <i>Cellulomonas fimi</i> DSM 20113                  | Ac            | F4H5H4 | YP_004455284.1         | 594 | PAS+LOV+SPOIIE     | 135 |
| 63 | <i>Cellulomonas flavigena</i> DSM 20109             | Ac            | D5UEA1 | YP_003638776.1         | 570 | LOV+GAF+SPOIIE     | 136 |
| 64 | <i>Cellulomonas</i> sp. JC225                       | Ac            |        | WP_019135604.1         | 564 | LOV+GAF+SPOIIE     | 137 |
| 65 | <i>Frankia</i> sp. BCU110501                        | Ac            |        | WP_018504846.1         | 664 | LOV+GAF+SPOIIE     | 138 |
| 66 | <i>Frankia</i> sp. CN3                              | Ac            | G6HCZ9 | WP_007513898.1         | 603 | LOV+GAF+SPOIIE     | 139 |
| 67 | <i>Frankia</i> sp. str. Eul1c                       | Ac            | E3J501 | YP_004015322.1         | 628 | LOV+GAF+SPOIIE     | 140 |
| 68 | <i>Geodermatophilus obscurus</i> DSM 43160          | Ac            | D2S7Y1 | YP_003411932.1         | 760 | PAS+LOV+GAF+SPOIIE | 141 |
| 69 | <i>Kineococcus radiotolerans</i> SRS30216           | Ac            | A6WG47 | YP_001364050.1         | 743 | GGDEF+LOV+EAL      | 142 |
|    |                                                     |               | A6W4U8 | YP_001360101.1         | 723 | LOV+GAF+SPOIIE     | 143 |
|    |                                                     |               | A6W4X7 | YP_001360130.1         | 408 | LOV+SPOIIE         | 144 |
| 70 | <i>Leifsonia rubra</i> CMS 76R                      | Ac            | S7W0I9 | WP_021809600.1         | 653 | LOV+GGDEF+EAL      | 145 |
| 71 | <i>Modestobacter marinus</i> BC501                  | Ac            | I4EZ22 | YP_006367116.1         | 750 | EAL+DICT+LOV+GGDEF | 146 |
|    | <i>Modestobacter marinus</i> BC502                  | Ac            | I4F5I6 | YP_006369358.1         | 776 | PAS+LOV+GAF+SPOIIE | 147 |
| 72 | <i>Nakamurella multipartita</i> DSM 44233           | Ac            | C8XJT7 | YP_003203637.1         | 365 | PAS+RR+LOV         | 148 |
|    |                                                     |               | C8X922 | YP_003204109.1         | 149 | Short-LOV          | 149 |
| 73 | <i>Rubrobacter radiotolerans</i>                    | Ac            | E9REA7 | BAJ78459.1             | 85  | Short-LOV          | 150 |
| 74 | <i>Rubrobacter xylanophilus</i> DSM 9941            | Ac            | Q1ARZ9 | YP_645641.1            | 581 | LOV+GAF+SPOIIE     | 151 |
| 75 | <i>Agrobacterium albertimagni</i> AOL15             | P( $\alpha$ ) | K2Q1D4 | WP_006728201.1         | 375 | LOV+Kinase         | 152 |
| 76 | <i>Agrobacterium</i> sp. 10MFCol1.1                 | P( $\alpha$ ) |        | WP_019566834.1         | 589 | LOV+GGDEF+EAL      | 153 |
| 77 | <i>Agrobacterium</i> sp. 224MFTsu3.1                | P( $\alpha$ ) |        | WP_020010289.1         | 369 | LOV+Kinase         | 154 |
| 78 | <i>Agrobacterium</i> sp. H13-3                      | P( $\alpha$ ) | F0L3W1 | YP_004278691.1         | 369 | LOV+Kinase         | 155 |

|    |                                                       |         |        |                               |     |                       |     |
|----|-------------------------------------------------------|---------|--------|-------------------------------|-----|-----------------------|-----|
|    |                                                       |         | F0LEX8 | YP_004444410.1                | 589 | LOV+GGDEF+EAL         | 156 |
| 79 | <i>Agrobacterium tumefaciens</i> 5A                   | P(α)    | HOHAA7 | WP_003515223.1                | 369 | LOV+Kinase            | 157 |
|    |                                                       |         | HOHGN3 | WP_003518335.1                | 589 | LOV+GGDEF+EAL         | 158 |
| 80 | <i>Agrobacterium vitis</i> (strain S4 / ATCC BAA-846) | P(α)    | B9K197 | YP_002547361.1                | 411 | LOV+ Kinase           | 159 |
| 81 | <i>Ahrensia</i> sp. R2A130                            | P(α)    | E0MQF6 | WP_009757882.1                | 325 | LOV+Kinase            | 160 |
| 82 | <i>alpha proteobacterium</i> JL T2015                 | P(α)Unc | M2U2Y4 | WP_008602941.1                | 345 | LOV+Kinase            | 161 |
| 83 | <i>alpha proteobacterium</i> L41A                     | P(α)Unc |        | WP_017504522.1                | 364 | LOV+Kinase            | 162 |
| 84 | <i>alpha proteobacterium</i> LLX12A                   | P(α)Unc |        | WP_017503590.1                | 200 | Short-LOV             | 163 |
|    |                                                       |         |        | WP_017502221.1                | 866 | LOV+PAS+GAF+Kinase    | 164 |
| 85 | <i>Amorphus coralli</i>                               | P(α)    |        | WP_018698921.1                | 773 | PAS+LOV+GGDEF+EAL     | 165 |
| 86 | <i>Asticcacaulis excentricus</i> (strain ATCC 15261)  | P(α)    | E8RN55 | YP_004087039.1                | 596 | LOV+Kinase+RR         | 166 |
| 87 | <i>Aureimonas ureilytica</i>                          | P(α)    |        | WP_019998669.1                | 306 | LOV+Kinase            | 167 |
|    |                                                       |         |        | WP_019997685.1                | 346 | LOV+Kinase            | 168 |
|    |                                                       |         |        | WP_019995998.1                | 406 | LOV+Kinase            | 169 |
| 88 | <i>Bradyrhizobium oligotrophicum</i> S58              | P(α)    | M4ZKM0 | YP_007510402.1                | 534 | LOV+Kinase+RR         | 170 |
| 89 | <i>Bradyrhizobium</i> sp. BTAi1                       | P(α)    | A5EAE7 | YP_001237047.1                | 534 | LOV+Kinase+RR         | 171 |
| 90 | <i>Bradyrhizobium</i> sp. ORS278                      | P(α)    | A4Z279 | YP_001208470.1                | 534 | LOV+Kinase+RR         | 172 |
| 91 | <i>Bradyrhizobium</i> sp. ORS 285                     | P(α)    | H0RX89 | WP_006611907.1                | 534 | LOV+Kinase+RR         | 173 |
|    |                                                       |         | H0RX89 | WP_006611907.1                | 534 | LOV+Kinase+RR         | 174 |
| 92 | <i>Bradyrhizobium</i> sp. ORS 375                     | P(α)    | H0SK82 | WP_009029541.1                | 534 | LOV+Kinase+RR         | 175 |
| 93 | <i>Bradyrhizobium</i> sp. STM 3809                    | P(α)    | H0SYI7 | WP_008961860.1                | 534 | LOV+Kinase+RR         | 176 |
| 94 | <i>Brevundimonas</i> sp. BAL3                         | P(α)    | B4WCV5 | WP_008259253.1                | 878 | LOV+PAS+GAF+Kinase+RR | 177 |
| 95 | <i>Brucella abortus</i> (strain 2308 A)               | P(α)    | C4IVN9 | WP_006016110.1/WP_002970660.1 | 496 | LOV+PAS+ Kinase       | 178 |
|    | <i>Brucella abortus</i> (strain 2308)                 | P(α)    | Q2YKK7 | NP_541657.1                   | 463 | LOV+PAS+ Kinase       | 179 |
|    | <i>Brucella abortus</i> 01-0065                       | P(α)    | S3WQE0 | NP_541657.1                   | 489 | LOV+Kinase            | 180 |
|    | <i>Brucella abortus</i> 01-0585                       | P(α)    | S3VF14 | NP_541657.1                   | 489 | LOV+Kinase            | 181 |
|    | <i>Brucella abortus</i> 01-0648                       | P(α)    | S3P9P5 | NP_541657.1                   | 489 | LOV+Kinase            | 182 |
|    | <i>Brucella abortus</i> 225/65                        | P(α)    | N7SDC2 | NP_541657.1                   | 489 | LOV+Kinase            | 183 |
|    | <i>Brucella abortus</i> 355/78                        | P(α)    | N7SLZ0 | NP_541657.1                   | 489 | LOV+Kinase            | 184 |
|    | <i>Brucella abortus</i> 544                           | P(α)    | N7SWJ8 | NP_541657.1                   | 489 | LOV+Kinase            | 185 |
|    | <i>Brucella abortus</i> 600/64                        | P(α)    | N7RYR9 | NP_541657.1                   | 489 | LOV+Kinase            | 186 |
|    | <i>Brucella abortus</i> 63/130                        | P(α)    | N7SCI3 | NP_541657.1                   | 489 | LOV+Kinase            | 187 |
|    | <i>Brucella abortus</i> 63/138                        | P(α)    | N7TSI7 | NP_541657.1                   | 489 | LOV+Kinase            | 188 |
|    | <i>Brucella abortus</i> 63/144                        | P(α)    | N7TUX2 | NP_541657.1                   | 489 | LOV+Kinase            | 189 |
|    | <i>Brucella abortus</i> 63/168                        | P(α)    | N7U9C9 | NP_541657.1                   | 489 | LOV+Kinase            | 190 |
|    | <i>Brucella abortus</i> 63/294                        | P(α)    | N7TE92 | WP_006091747.1                | 489 | LOV+Kinase            | 191 |
|    | <i>Brucella abortus</i> 63/59                         | P(α)    | N7A0H8 | NP_541657.1                   | 489 | LOV+Kinase            | 192 |
|    | <i>Brucella abortus</i> 64/108                        | P(α)    | N7TIY1 | NP_541657.1                   | 489 | LOV+Kinase            | 193 |
|    | <i>Brucella abortus</i> 64/122                        | P(α)    | N7A7E6 | NP_541657.1                   | 489 | LOV+Kinase            | 194 |
|    | <i>Brucella abortus</i> 64/81                         | P(α)    | N7UVS8 | NP_541657.1                   | 489 | LOV+Kinase            | 195 |
|    | <i>Brucella abortus</i> 65/110                        | P(α)    | N7AJ59 | NP_541657.1                   | 489 | LOV+Kinase            | 196 |
|    | <i>Brucella abortus</i> 65/157                        | P(α)    | N7U3Y2 | NP_541657.1                   | 489 | LOV+Kinase            | 197 |
|    | <i>Brucella abortus</i> 65/63                         | P(α)    | N7VHX7 | NP_541657.1                   | 489 | LOV+Kinase            | 198 |
|    | <i>Brucella abortus</i> 67/781                        | P(α)    | N7ASN3 | NP_541657.1                   | 489 | LOV+Kinase            | 199 |
|    | <i>Brucella abortus</i> 67/93                         | P(α)    | N7VRX4 | NP_541657.1                   | 489 | LOV+Kinase            | 200 |
|    | <i>Brucella abortus</i> 68-3396P                      | P(α)    | S3TMU2 | NP_541657.1                   | 489 | LOV+Kinase            | 201 |
|    | <i>Brucella abortus</i> 76-1413                       | P(α)    | S3RZi8 | NP_541657.1                   | 489 | LOV+Kinase            | 202 |
|    | <i>Brucella abortus</i> 78/14                         | P(α)    | N7US78 | NP_541657.1                   | 489 | LOV+Kinase            | 203 |
|    | <i>Brucella abortus</i> 78/32                         | P(α)    | N7WH17 | NP_541657.1                   | 489 | LOV+Kinase            | 204 |
|    | <i>Brucella abortus</i> 78/36                         | P(α)    | N7A0T6 | NP_541657.1                   | 489 | LOV+Kinase            | 205 |
|    | <i>Brucella abortus</i> 80/101                        | P(α)    | N7VBV9 | NP_541657.1                   | 489 | LOV+Kinase            | 206 |
|    | <i>Brucella abortus</i> 80/102                        | P(α)    | N7BFC1 | NP_541657.1                   | 489 | LOV+Kinase            | 207 |
|    | <i>Brucella abortus</i> 80/108                        | P(α)    | N7BQ67 | NP_541657.1                   | 489 | LOV+Kinase            | 208 |

|     |                                             |      |        |                            |     |                 |     |
|-----|---------------------------------------------|------|--------|----------------------------|-----|-----------------|-----|
|     | <i>Brucella abortus</i> 80/28               | P(α) | N7WPT0 | NP_541657.1                | 489 | LOV+Kinase      | 209 |
|     | <i>Brucella abortus</i> 80-1399             | P(α) | S3RXL3 | NP_541657.1                | 489 | LOV+Kinase      | 210 |
|     | <i>Brucella abortus</i> 82-2330             | P(α) | S3SEP8 | NP_541657.1                | 489 | LOV+Kinase      | 211 |
|     | <i>Brucella abortus</i> 82-3893             | P(α) | S3RYB1 | NP_541657.1                | 489 | LOV+Kinase      | 212 |
|     | <i>Brucella abortus</i> 84/26               | P(α) | N7VRB7 | NP_541657.1                | 489 | LOV+Kinase      | 213 |
|     | <i>Brucella abortus</i> 84-0928             | P(α) | S3RC75 | NP_541657.1                | 489 | LOV+Kinase      | 214 |
|     | <i>Brucella abortus</i> 85/140              | P(α) | N7BTA4 | NP_541657.1                | 489 | LOV+Kinase      | 215 |
|     | <i>Brucella abortus</i> 85/69               | P(α) | N7W4L9 | NP_541657.1                | 489 | LOV+Kinase      | 216 |
|     | <i>Brucella abortus</i> 85-1058             | P(α) | S3X8D7 | NP_541657.1                | 489 | LOV+Kinase      | 217 |
|     | <i>Brucella abortus</i> 863/67              | P(α) | N7C384 | NP_541657.1                | 489 | LOV+Kinase      | 218 |
|     | <i>Brucella abortus</i> 87/28               | P(α) | N7XPS1 | NP_541657.1                | 489 | LOV+Kinase      | 219 |
|     | <i>Brucella abortus</i> 87-0095             | P(α) | S3W4M5 | NP_541657.1                | 489 | LOV+Kinase      | 220 |
|     | <i>Brucella abortus</i> 87-2211             | P(α) | S3VXQ7 | NP_541657.1                | 489 | LOV+Kinase      | 221 |
|     | <i>Brucella abortus</i> 877/67              | P(α) | N7XME5 | NP_541657.1                | 489 | LOV+Kinase      | 222 |
|     | <i>Brucella abortus</i> 88/19               | P(α) | N7CBP8 | NP_541657.1                | 489 | LOV+Kinase      | 223 |
|     | <i>Brucella abortus</i> 88/217              | P(α) | N7WYJ1 | WP_006091747.1             | 489 | LOV+Kinase      | 224 |
|     | <i>Brucella abortus</i> 88/226              | P(α) | N7BPT2 | NP_541657.1                | 489 | LOV+Kinase      | 225 |
|     | <i>Brucella abortus</i> 89-0363             | P(α) | S3R3J0 | NP_541657.1                | 489 | LOV+Kinase      | 226 |
|     | <i>Brucella abortus</i> 90/50               | P(α) | N7BZI6 | NP_541657.1                | 489 | LOV+Kinase      | 227 |
|     | <i>Brucella abortus</i> 90-0737             | P(α) | S3Q4A1 | NP_541657.1                | 489 | LOV+Kinase      | 228 |
|     | <i>Brucella abortus</i> 90-0742             | P(α) | S3RJ59 | NP_541657.1                | 489 | LOV+Kinase      | 229 |
|     | <i>Brucella abortus</i> 90-0775             | P(α) | S3QCW3 | NP_541657.1                | 489 | LOV+Kinase      | 230 |
|     | <i>Brucella abortus</i> 90-0962             | P(α) | S3R6U3 | NP_541657.1                | 489 | LOV+Kinase      | 231 |
|     | <i>Brucella abortus</i> 90-1280             | P(α) | S3Q5W1 | NP_541657.1                | 489 | LOV+Kinase      | 232 |
|     | <i>Brucella abortus</i> 93/1                | P(α) | N7D2H4 | NP_541657.1                | 489 | LOV+Kinase      | 233 |
|     | <i>Brucella abortus</i> 93/2                | P(α) | R8VWD1 | NP_541657.1                | 489 | LOV+Kinase      | 234 |
|     | <i>Brucella abortus</i> 94-1313             | P(α) | S3QH15 | NP_541657.1                | 489 | LOV+Kinase      | 235 |
|     | <i>Brucella abortus</i> A13334              | P(α) | G8T504 | YP_005114240.1/YP_223408.1 | 458 | LOV+PAS+Kinase  | 236 |
|     | <i>Brucella abortus</i> B10-0018            | P(α) | S3NW52 | NP_541657.1                | 489 | LOV+Kinase      | 237 |
|     | <i>Brucella abortus</i> B10-0091            | P(α) | S3PQB4 | NP_541657.1                | 489 | LOV+Kinase      | 238 |
|     | <i>Brucella abortus</i> B10-0973            | P(α) | S3PCT0 | NP_541657.1                | 489 | LOV+Kinase      | 239 |
| 96  | <i>Brucella abortus</i> biovar 1 str. 9-941 | P(α) | Q577Y7 | YP_223408.1                | 458 | LOV+PAS+ Kinase | 240 |
|     | <i>Brucella abortus</i> bv. 1 str. NI010    | P(α) | H3QEE3 | EHR17495.1/NP_541657.1     | 489 | LOV+Kinase+PAS  | 241 |
|     | <i>Brucella abortus</i> bv. 1 str. NI016    | P(α) | H3QN03 | EHR18337.1/NP_541657.1     | 489 | LOV+Kinase+PAS  | 242 |
|     | <i>Brucella abortus</i> bv. 1 str. NI021    | P(α) | H3QX28 | EHR26941.1/NP_541657.1     | 489 | LOV+Kinase+PAS  | 243 |
|     | <i>Brucella abortus</i> bv. 1 str. NI259    | P(α) | H3R3M0 | EHR27594.1/NP_541657.1     | 489 | LOV+Kinase+PAS  | 244 |
|     | <i>Brucella abortus</i> bv. 1 str. NI435a   | P(α) | H3PCZ9 | EHR09267.1/NP_541657.1     | 489 | LOV+Kinase+PAS  | 245 |
|     | <i>Brucella abortus</i> bv. 1 str. NI474    | P(α) | H3PNQ1 | EHR07958.1/NP_541657.1     | 489 | LOV+Kinase+PAS  | 246 |
|     | <i>Brucella abortus</i> bv. 1 str. NI486    | P(α) | H3PTS7 | EHR11756.1/NP_541657.1     | 489 | LOV+Kinase+PAS  | 247 |
|     | <i>Brucella abortus</i> bv. 1 str. NI488    | P(α) | H3PZJ2 | EHR26142.1/NP_541657.1     | 489 | LOV+Kinase+PAS  | 248 |
| 97  | <i>Brucella abortus</i> bv. 2 str.86/8/59   | P(α) | C9V2E2 | WP_002966045.1             | 456 | LOV+PAS+Kinase  | 249 |
| 98  | <i>Brucella abortus</i> bv. 3 str. Tulya    | P(α) | C9UTV3 | WP_002966045.1             | 456 | LOV+PAS+Kinase  | 250 |
| 99  | <i>Brucella abortus</i> bv. 4 str.292       | P(α) | C9UJF2 | WP_002967295.1             | 179 | Short-LOV       | 251 |
| 100 | <i>Brucella abortus</i> bv. 5 str. B3196    | P(α) | D7H767 | EFH32827.1/NP_541657.1     | 489 | LOV+PAS+Kinase  | 252 |
| 101 | <i>Brucella abortus</i> bv. 6 str.870       | P(α) | C9U9U0 | WP_002966045.1             | 456 | LOV+PAS+Kinase  | 253 |
| 102 | <i>Brucella abortus</i> bv. 9 str.C68       | P(α) | C9VPJ9 | WP_002966045.1             | 456 | LOV+PAS+Kinase  | 254 |
|     | <i>Brucella abortus</i> CNGB 1011           | P(α) | N7DAK7 | NP_541657.1                | 489 | LOV+Kinase      | 255 |
|     | <i>Brucella abortus</i> CNGB 1432           | P(α) | N7CIS4 | NP_541657.1                | 489 | LOV+Kinase      | 256 |
|     | <i>Brucella abortus</i> CNGB 308            | P(α) | N7CYG9 | NP_541657.1                | 489 | LOV+Kinase      | 257 |
|     | <i>Brucella abortus</i> CNGB 436            | P(α) | N7D8M7 | NP_541657.1                | 489 | LOV+Kinase      | 258 |
|     | <i>Brucella abortus</i> CNGB 752            | P(α) | N7EJN5 | NP_541657.1                | 489 | LOV+Kinase      | 259 |
|     | <i>Brucella abortus</i> CNGB 759            | P(α) | N7DJA9 | NP_541657.1                | 489 | LOV+Kinase      | 260 |
|     | <i>Brucella abortus</i> CNGB 966            | P(α) | N7F2F4 | NP_541657.1                | 489 | LOV+Kinase      | 261 |



|     |                                            |               |        |                               |     |                 |     |
|-----|--------------------------------------------|---------------|--------|-------------------------------|-----|-----------------|-----|
|     | <i>Brucella abortus</i> F1/06 B1           | P( $\alpha$ ) | N7F3R6 | NP_541657.1                   | 489 | LOV+Kinase      | 262 |
|     | <i>Brucella abortus</i> F1/06-B21          | P( $\alpha$ ) | N7YE57 | NP_541657.1                   | 489 | LOV+Kinase      | 263 |
|     | <i>Brucella abortus</i> F10/05-11          | P( $\alpha$ ) | N7YGE1 | NP_541657.1                   | 489 | LOV+Kinase      | 264 |
|     | <i>Brucella abortus</i> F10/06-3           | P( $\alpha$ ) | N7Z0T9 | NP_541657.1                   | 489 | LOV+Kinase      | 265 |
|     | <i>Brucella abortus</i> F2/06-8            | P( $\alpha$ ) | N7FEA3 | WP_006234595.1                | 375 | LOV+Kinase      | 266 |
|     | <i>Brucella abortus</i> F3/01-300          | P( $\alpha$ ) | N7FLM3 | NP_541657.1                   | 489 | LOV+Kinase      | 267 |
|     | <i>Brucella abortus</i> F3/07-1            | P( $\alpha$ ) | N7FVJ3 | NP_541657.1                   | 489 | LOV+Kinase      | 268 |
|     | <i>Brucella abortus</i> F5/04-7            | P( $\alpha$ ) | N7Z418 | NP_541657.1                   | 489 | LOV+Kinase      | 269 |
|     | <i>Brucella abortus</i> F6/05-2            | P( $\alpha$ ) | N7FAF8 | NP_541657.1                   | 489 | LOV+Kinase      | 270 |
|     | <i>Brucella abortus</i> F6/05-3            | P( $\alpha$ ) | N7Y6J6 | NP_541657.1                   | 489 | LOV+Kinase      | 271 |
|     | <i>Brucella abortus</i> F6/05-4            | P( $\alpha$ ) | N7ZND9 | NP_541657.1                   | 489 | LOV+Kinase      | 272 |
|     | <i>Brucella abortus</i> F6/05-9            | P( $\alpha$ ) | N8A0V9 | NP_541657.1                   | 489 | LOV+Kinase      | 273 |
|     | <i>Brucella abortus</i> I103 (UK3/01)      | P( $\alpha$ ) | R8WBW5 | NP_541657.1                   | 489 | LOV+Kinase      | 274 |
|     | <i>Brucella abortus</i> levi gila          | P( $\alpha$ ) | N7GL72 | NP_541657.1                   | 489 | LOV+Kinase      | 275 |
|     | <i>Brucella abortus</i> LEVI237            | P( $\alpha$ ) | N7GMY5 | NP_541657.1                   | 489 | LOV+Kinase      | 276 |
|     | <i>Brucella abortus</i> NCTC 8038          | P( $\alpha$ ) | D0ATW6 | EEW81936.1/YP_001932550.1     | 489 | LOV+PAS+Kinase  | 277 |
|     | <i>Brucella abortus</i> NI240              | P( $\alpha$ ) | N7GW46 | NP_541657.1                   | 489 | LOV+Kinase      | 278 |
|     | <i>Brucella abortus</i> NI274              | P( $\alpha$ ) | N7H5I5 | NP_541657.1                   | 489 | LOV+Kinase      | 279 |
|     | <i>Brucella abortus</i> NI352              | P( $\alpha$ ) | N8A4N3 | NP_541657.1                   | 489 | LOV+Kinase      | 280 |
|     | <i>Brucella abortus</i> NI380              | P( $\alpha$ ) | N7HEI6 | NP_541657.1                   | 489 | LOV+Kinase      | 281 |
|     | <i>Brucella abortus</i> NI388              | P( $\alpha$ ) | N7HVQ9 | NP_541657.1                   | 489 | LOV+Kinase      | 282 |
|     | <i>Brucella abortus</i> NI422              | P( $\alpha$ ) | N8AH36 | NP_541657.1                   | 489 | LOV+Kinase      | 283 |
|     | <i>Brucella abortus</i> NI492              | P( $\alpha$ ) | N7GUN1 | NP_541657.1                   | 489 | LOV+Kinase      | 284 |
|     | <i>Brucella abortus</i> NI495a             | P( $\alpha$ ) | N8AG43 | NP_541657.1                   | 489 | LOV+Kinase      | 285 |
|     | <i>Brucella abortus</i> NI518              | P( $\alpha$ ) | N7I5T2 | NP_541657.1                   | 489 | LOV+Kinase      | 286 |
|     | <i>Brucella abortus</i> NI593              | P( $\alpha$ ) | N7IMP0 | NP_541657.1                   | 489 | LOV+Kinase      | 287 |
|     | <i>Brucella abortus</i> NI613              | P( $\alpha$ ) | N7IQC5 | NP_541657.1                   | 489 | LOV+Kinase      | 288 |
|     | <i>Brucella abortus</i> NI622              | P( $\alpha$ ) | N7HW91 | NP_541657.1                   | 489 | LOV+Kinase      | 289 |
|     | <i>Brucella abortus</i> NI628              | P( $\alpha$ ) | N7I4W1 | NP_541657.1                   | 489 | LOV+Kinase      | 290 |
|     | <i>Brucella abortus</i> NI633              | P( $\alpha$ ) | N7JHA9 | NP_541657.1                   | 489 | LOV+Kinase      | 291 |
|     | <i>Brucella abortus</i> NI639              | P( $\alpha$ ) | N7IUD0 | NP_541657.1                   | 489 | LOV+Kinase      | 292 |
|     | <i>Brucella abortus</i> NI645              | P( $\alpha$ ) | N7K5J7 | NP_541657.1                   | 489 | LOV+Kinase      | 293 |
|     | <i>Brucella abortus</i> NI649              | P( $\alpha$ ) | N7K6Q2 | NP_541657.1                   | 489 | LOV+Kinase      | 294 |
|     | <i>Brucella abortus</i> R42-08             | P( $\alpha$ ) | N7ZQU9 | NP_541657.1                   | 489 | LOV+Kinase      | 295 |
|     | <i>Brucella abortus</i> RB51-AHVLA         | P( $\alpha$ ) | N8L9B2 | NP_541657.1                   | 489 | LOV+Kinase      | 296 |
|     | <i>Brucella abortus</i> S19                | P( $\alpha$ ) | B2SB67 | YP_001932550.1                | 489 | LOV+PAS+ Kinase | 297 |
| 103 | <i>Brucella canis</i> 79/122               | P( $\alpha$ ) | N8AYL0 | NP_541657.1                   | 489 | LOV+Kinase      | 298 |
|     | <i>Brucella canis</i> ATCC 23365           | P( $\alpha$ ) | A9MBM8 | YP_001594536.1/NP_541657.1    | 463 | LOV+PAS+ Kinase | 299 |
|     | <i>Brucella canis</i> CNGB 1172            | P( $\alpha$ ) | N7KG92 | NP_541657.1                   | 489 | LOV+Kinase      | 300 |
|     | <i>Brucella canis</i> CNGB 1324            | P( $\alpha$ ) | N9S6M2 | NP_541657.1                   | 489 | LOV+Kinase      | 301 |
|     | <i>Brucella canis</i> CNGB 513             | P( $\alpha$ ) | N8A4Z2 | NP_541657.1                   | 489 | LOV+Kinase      | 302 |
|     | <i>Brucella canis</i> F7/05A               | P( $\alpha$ ) | N9TZC9 | NP_541657.1                   | 489 | LOV+Kinase      | 303 |
|     | <i>Brucella canis</i> HSK A52141           | P( $\alpha$ ) | G8SWF4 | YP_005152773.1/YP_223408.1    | 458 | LOV+PAS+Kinase  | 304 |
|     | <i>Brucella canis</i> UK10/02              | P( $\alpha$ ) | N7JSW0 | NP_541657.1                   | 489 | LOV+Kinase      | 305 |
| 104 | <i>Brucella ceti</i> B1/94                 | P( $\alpha$ ) | C9VFB0 | WP_002966045.1                | 456 | LOV+PAS+Kinase  | 306 |
|     | <i>Brucella ceti</i> M13/05/1              | P( $\alpha$ ) | C9TAF8 | WP_006641754.1                | 456 | LOV+PAS+Kinase  | 307 |
|     | <i>Brucella ceti</i> M490/95/1             | P( $\alpha$ ) | D1FCE4 | WP_002966045.1                | 456 | LOV+PAS+Kinase  | 308 |
|     | <i>Brucella ceti</i> M644/93/1             | P( $\alpha$ ) | C9T165 | WP_006641754.1                | 456 | LOV+PAS+Kinase  | 309 |
|     | <i>Brucella ceti</i> str. Cudo             | P( $\alpha$ ) | C0GBC6 | WP_006016110.1/WP_002970660.1 | 496 | LOV+PAS+ Kinase | 310 |
| 105 | <i>Brucella melitensis</i> ( strain M5-90) | P( $\alpha$ ) | F2GXX4 | YP_005602181.1/YP_223408.1    | 458 | LOV+PAS+Kinase  | 311 |
|     | <i>Brucella melitensis</i> (strain M28)    | P( $\alpha$ ) | F2HYM1 | YP_005598818.1/YP_223408.1    | 458 | PAS+LOV+Kinase  | 312 |
|     | <i>Brucella melitensis</i> 16M             | P( $\alpha$ ) | Q8YC53 | NP_541657.1                   | 489 | LOV+PAS+ Kinase | 313 |
|     | <i>Brucella melitensis</i> 64/150          | P( $\alpha$ ) | N7L6K7 | NP_541657.1                   | 489 | LOV+Kinase      | 314 |

|     |                                                 |      |        |                            |     |                 |     |
|-----|-------------------------------------------------|------|--------|----------------------------|-----|-----------------|-----|
|     | <i>Brucella melitensis</i> 66/59                | P(α) | N7L954 | NP_541657.1                | 489 | LOV+Kinase      | 315 |
|     | <i>Brucella melitensis</i> ATCC 23457           | P(α) | C0RLA9 | YP_002734346.1/NP_541657.1 | 463 | LOV+PAS+ Kinase | 316 |
|     | <i>Brucella melitensis</i> B115                 | P(α) | N8KUY5 | NP_541657.1                | 489 | LOV+Kinase      | 317 |
|     | <i>Brucella melitensis</i> BG2 (S27)            | P(α) | N8BQL3 | NP_541657.1                | 489 | LOV+Kinase      | 318 |
| 106 | <i>Brucella melitensis</i> biotype 1 NCTC 10094 | P(α) | D0B724 | EEW87416.1/NP_541657.1     | 489 | LOV+PAS+Kinase  | 319 |
| 107 | <i>Brucella melitensis</i> bv. 1 str. Rev.1     | P(α) | D1EUC3 | WP_002966045.1             | 456 | LOV+PAS+Kinase  | 320 |
| 108 | <i>Brucella melitensis</i> bv. 2 str.63/9       | P(α) | D0GAY7 | EEZ16518.1/NP_541657.1     | 489 | PAS+LOV+Kinase  | 321 |
| 109 | <i>Brucella melitensis</i> bv. 3 str. Ether     | P(α) | D1F3T4 | WP_004684957.1             | 456 | LOV+PAS+Kinase  | 322 |
|     | <i>Brucella melitensis</i> CNGB 1076            | P(α) | N7KEE3 | NP_541657.1                | 489 | LOV+Kinase      | 323 |
|     | <i>Brucella melitensis</i> CNGB 1120            | P(α) | N7LPJ2 | NP_541657.1                | 489 | LOV+Kinase      | 324 |
|     | <i>Brucella melitensis</i> CNGB 290             | P(α) | N7L3G2 | NP_541657.1                | 489 | LOV+Kinase      | 325 |
|     | <i>Brucella melitensis</i> F1/06 B10            | P(α) | N8BTU0 | NP_541657.1                | 489 | LOV+Kinase      | 326 |
|     | <i>Brucella melitensis</i> F10/05-2             | P(α) | N7LAN8 | NP_541657.1                | 489 | LOV+Kinase      | 327 |
|     | <i>Brucella melitensis</i> F10/06-16            | P(α) | N8AVE7 | NP_541657.1                | 489 | LOV+Kinase      | 328 |
|     | <i>Brucella melitensis</i> F15/06-7             | P(α) | N8L9A1 | WP_005975426.1             | 489 | LOV+Kinase      | 329 |
|     | <i>Brucella melitensis</i> F2/06-6              | P(α) | N7MP94 | NP_541657.1                | 489 | LOV+Kinase      | 330 |
|     | <i>Brucella melitensis</i> F3/02                | P(α) | N7MZL6 | NP_541657.1                | 489 | LOV+Kinase      | 331 |
|     | <i>Brucella melitensis</i> F5/07-239A           | P(α) | N7N8P6 | WP_005975426.1             | 489 | LOV+Kinase      | 332 |
|     | <i>Brucella melitensis</i> F6/05-6              | P(α) | N7N2Y6 | NP_541657.1                | 489 | LOV+Kinase      | 333 |
|     | <i>Brucella melitensis</i> F8/01-155            | P(α) | N8CHP3 | NP_541657.1                | 489 | LOV+Kinase      | 334 |
|     | <i>Brucella melitensis</i> F9/05                | P(α) | N8BBC7 | NP_541657.1                | 489 | LOV+Kinase      | 335 |
|     | <i>Brucella melitensis</i> NI                   | P(α) | G4PL89 | YP_005660943.1/NP_541657.1 | 463 | LOV+PAS+Kinase  | 336 |
|     | <i>Brucella melitensis</i> R3/07-2              | P(α) | N7NQR7 | WP_005975426.1             | 489 | LOV+Kinase      | 337 |
|     | <i>Brucella melitensis</i> UK14/06              | P(α) | N8CYC4 | NP_541657.1                | 489 | LOV+Kinase      | 338 |
|     | <i>Brucella melitensis</i> UK19/04              | P(α) | N7NKY4 | NP_541657.1                | 489 | LOV+Kinase      | 339 |
|     | <i>Brucella melitensis</i> UK22/04              | P(α) | N8BVK8 | NP_541657.1                | 489 | LOV+Kinase      | 340 |
|     | <i>Brucella melitensis</i> UK22/06              | P(α) | N7P9M1 | NP_541657.1                | 489 | LOV+Kinase      | 341 |
|     | <i>Brucella melitensis</i> UK23/06              | P(α) | N8DD80 | NP_541657.1                | 489 | LOV+Kinase      | 342 |
|     | <i>Brucella melitensis</i> UK24/06              | P(α) | N8DSU1 | NP_541657.1                | 489 | LOV+Kinase      | 343 |
|     | <i>Brucella melitensis</i> UK29/05              | P(α) | N8DYS6 | NP_541657.1                | 489 | LOV+Kinase      | 344 |
|     | <i>Brucella melitensis</i> UK3/06               | P(α) | N8D0C9 | NP_541657.1                | 489 | LOV+Kinase      | 345 |
|     | <i>Brucella melitensis</i> UK31/99              | P(α) | N8EGG8 | WP_005975426.1             | 489 | LOV+Kinase      | 346 |
|     | <i>Brucella melitensis</i> UK37/05              | P(α) | N8DI44 | NP_541657.1                | 489 | LOV+Kinase      | 347 |
| 110 | <i>Brucella microti</i> CCM 4915                | P(α) | C7LI74 | YP_003105374.1             | 489 | LOV+PAS+ Kinase | 348 |
| 111 | <i>Brucella neotomae</i> 5K33                   | P(α) | C9V5Q3 | WP_004687274.1             | 456 | LOV+PAS+Kinase  | 349 |
| 112 | <i>Brucella ovis</i> ATCC 25840                 | P(α) | A5VUS1 | YP_001257576.1             | 463 | LOV+PAS+ Kinase | 350 |
| 113 | <i>Brucella pinnipedialis</i> B2/94             | P(α) | C9TZH  | WP_002966045.1             | 456 | LOV+PAS+Kinase  | 351 |
|     | <i>Brucella pinnipedialis</i> B2/94             | P(α) | F9YN64 | YP_004757837.1/NP_541657.1 | 489 | LOV+PAS+Kinase  | 352 |
|     | <i>Brucella pinnipedialis</i> M292/94/1         | P(α) | D1ELF4 | WP_002966045.1             | 456 | LOV+PAS+Kinase  | 353 |
| 114 | <i>Brucella</i> sp. 56/94                       | P(α) | N8FIV6 | NP_541657.1                | 489 | LOV+Kinase      | 354 |
| 115 | <i>Brucella</i> sp. 63/311                      | P(α) | N8FUE5 | WP_006164629.1             | 489 | LOV+Kinase      | 355 |
| 116 | <i>Brucella</i> sp. 83/13                       | P(α) | D1D1A4 | WP_008936815.1             | 456 | LOV+PAS+Kinase  | 356 |
| 117 | <i>Brucella</i> sp. B01                         | P(α) | E0DRB7 | WP_008510638.1             | 489 | LOV+PAS+Kinase  | 357 |
| 118 | <i>Brucella</i> sp. B02                         | P(α) | E2PN86 | WP_009364301.1             | 434 | LOV+Kinase      | 358 |
| 119 | <i>Brucella</i> sp. F23/97                      | P(α) | N8G2R7 | NP_541657.1                | 489 | LOV+Kinase      | 359 |
| 120 | <i>Brucella</i> sp. F5/99                       | P(α) | D0REC6 | EEY24775.1/NP_541657.1     | 489 | LOV+PAS+Kinase  | 360 |
| 121 | <i>Brucella</i> sp. F8/99                       | P(α) | N8GJ09 | NP_541657.1                | 489 | LOV+Kinase      | 361 |
| 122 | <i>Brucella</i> sp. F96/2                       | P(α) | N8FEG5 | NP_541657.1                | 489 | LOV+Kinase      | 362 |
| 123 | <i>Brucella</i> sp. NF 2653                     | P(α) | E0DXH7 | WP_009363103.1             | 489 | LOV+PAS+Kinase  | 363 |
| 124 | <i>Brucella</i> sp. NVSL 07-0026                | P(α) | D6LSE  | WP_002966045.1             | 456 | LOV+PAS+Kinase  | 364 |
| 125 | <i>Brucella</i> sp. UK1/97                      | P(α) | N8FUZ7 | NP_541657.1                | 489 | LOV+Kinase      | 365 |
| 126 | <i>Brucella</i> sp. UK40/99                     | P(α) | N8H492 | NP_541657.1                | 489 | LOV+Kinase      | 366 |
| 127 | <i>Brucella</i> sp. UK5/01                      | P(α) | N7P2W7 | NP_541657.1                | 489 | LOV+Kinase      | 367 |

|     |                                                       |      |        |                            |     |                       |     |
|-----|-------------------------------------------------------|------|--------|----------------------------|-----|-----------------------|-----|
| 128 | <i>Brucella suis</i> 01-5744                          | P(α) | N8HLS9 | NP_541657.1                | 489 | LOV+Kinase            | 368 |
|     | <i>Brucella suis</i> 1330                             | P(α) | Q8FW73 | NP_699772.1                | 463 | LOV+PAS+ Kinase       | 369 |
|     | <i>Brucella suis</i> 63/252                           | P(α) | N7QG29 | NP_541657.1                | 489 | LOV+Kinase            | 370 |
|     | <i>Brucella suis</i> 63/261                           | P(α) | N8I3A5 | NP_541657.1                | 489 | LOV+Kinase            | 371 |
|     | <i>Brucella suis</i> 92/29                            | P(α) | N7QIN4 | NP_541657.1                | 489 | LOV+Kinase            | 372 |
|     | <i>Brucella suis</i> 92/63                            | P(α) | N7PMB2 | NP_541657.1                | 489 | LOV+Kinase            | 373 |
|     | <i>Brucella suis</i> 94/11                            | P(α) | N7Q4V8 | NP_541657.1                | 489 | LOV+Kinase            | 374 |
|     | <i>Brucella suis</i> ATCC 23445                       | P(α) | A9WYQ7 | YP_001622395.1/NP_541657.1 | 463 | LOV+PAS+ Kinase       | 375 |
| 129 | <i>Brucella suis</i> bv. 3 str686                     | P(α) | D0PFT  | WP_002966045.1             | 456 | LOV+PAS+Kinase        | 376 |
| 130 | <i>Brucella suis</i> bv. 4 str. 40                    | P(α) | D0BGV2 | WP_004692249.1             | 489 | LOV+PAS+Kinase        | 377 |
| 131 | <i>Brucella suis</i> bv. 5 str.513                    | P(α) | D0P6S3 | WP_002966045.1             | 456 | LOV+PAS+Kinase        | 378 |
|     | <i>Brucella suis</i> CNGB 247                         | P(α) | N8GXW2 | NP_541657.1                | 489 | LOV+Kinase            | 379 |
|     | <i>Brucella suis</i> CNGB 786                         | P(α) | N7Q721 | NP_541657.1                | 489 | LOV+Kinase            | 380 |
|     | <i>Brucella suis</i> F12/02                           | P(α) | N8IR38 | NP_541657.1                | 489 | LOV+Kinase            | 381 |
|     | <i>Brucella suis</i> F4/06-146                        | P(α) | N7QNL3 | NP_541657.1                | 489 | LOV+Kinase            | 382 |
|     | <i>Brucella suis</i> F5/03-2                          | P(α) | N7RVY7 | NP_541657.1                | 489 | LOV+Kinase            | 383 |
|     | <i>Brucella suis</i> F5/05-10                         | P(α) | N8IZA7 | NP_541657.1                | 489 | LOV+Kinase            | 384 |
|     | <i>Brucella suis</i> F5/05-4                          | P(α) | N8HS15 | NP_541657.1                | 489 | LOV+Kinase            | 385 |
|     | <i>Brucella suis</i> F7/06-1                          | P(α) | N8JI74 | NP_541657.1                | 489 | LOV+Kinase            | 386 |
|     | <i>Brucella suis</i> F7/06-2                          | P(α) | N8JJG0 | NP_541657.1                | 489 | LOV+Kinase            | 387 |
|     | <i>Brucella suis</i> F7/06-5                          | P(α) | N8ILB3 | NP_541657.1                | 489 | LOV+Kinase            | 388 |
|     | <i>Brucella suis</i> F8/06-1                          | P(α) | N8K0M4 | NP_541657.1                | 489 | LOV+Kinase            | 389 |
|     | <i>Brucella suis</i> F8/06-2                          | P(α) | N7R8U4 | NP_541657.1                | 489 | LOV+Kinase            | 390 |
|     | <i>Brucella suis</i> F8/06-3                          | P(α) | N8KIG9 | NP_541657.1                | 489 | LOV+Kinase            | 391 |
|     | <i>Brucella suis</i> F9/06-1                          | P(α) | N8KJS5 | NP_541657.1                | 489 | LOV+Kinase            | 392 |
|     | <i>Brucella suis</i> VBI22                            | P(α) | G8NMK8 | YP_005108587.1/NP_541657.1 | 463 | LOV+PAS+Kinase        | 393 |
| 132 | <i>Caulobacter crescentus</i> (strain NA1000 / CB15N) | P(α) | B8GYF7 | YP_002515662.1/NP_419104.2 | 368 | LOV+ Kinase           | 394 |
|     | <i>Caulobacter crescentus</i> CB15                    | P(α) | Q9ABE3 | NP_419104.2                | 449 | LOV+ Kinase           | 395 |
|     | <i>Caulobacter crescentus</i> OR37                    | P(α) | R0EN90 | WP_004615751.1             | 368 | LOV+Kinase            | 396 |
| 133 | <i>Caulobacter segnis</i> DSM 7131                    | P(α) | D5VP68 | YP_003594909.1             | 366 | LOV+Kinase            | 397 |
| 134 | <i>Caulobacter</i> sp. AP07                           | P(α) | J3A321 | WP_007673901.1             | 369 | LOV+Kinase            | 398 |
| 135 | <i>Caulobacter</i> sp. JGI 0001013-O16                | P(α) |        | WP_018061565.1             | 373 | LOV+Kinase            | 399 |
| 136 | <i>Caulobacter</i> sp. K31                            | P(α) | B0T3W0 | YP_001684922.1             | 360 | LOV+ Kinase           | 400 |
|     |                                                       |      | B0T127 | YP_001686173.1             | 369 | LOV+ Kinase           | 401 |
|     |                                                       |      | B0T3W1 | YP_001684923.1             | 922 | LOV+3PAS +Kinase+RR   | 402 |
| 137 | <i>Citricella</i> sp. 357                             | P(α) | I1B280 | WP_009502647.1             | 178 | Short-LOV             | 403 |
| 138 | <i>Citricella</i> sp. SE45                            | P(α) | D0CZ83 | WP_008883518.1             | 182 | Short-LOV             | 404 |
| 139 | <i>Citromicrobium bathyomarinum</i>                   | P(α) |        | WP_010236370.1             | 335 | LOV+Kinase            | 405 |
| 140 | <i>Citromicrobium</i> sp. JLT1363                     | P(α) |        | WP_010408641.1             | 358 | LOV+Kinase            | 406 |
|     |                                                       |      |        | WP_010412930.1             | 222 | LOV+RR                | 407 |
| 141 | <i>Dinoroseobacter shibae</i> DFL 12                  | P(α) | A8LHT  | YP_001532478.1             | 338 | LOV+ Kinase           | 408 |
|     |                                                       |      | A8LNC2 | YP_001533236.1             | 920 | LOV+PAS+PAS+Kinase+RR | 409 |
|     |                                                       |      | A8LP63 | YP_001533346.1             | 139 | Short-LOV             | 410 |
| 142 | <i>Eliaera tepidiphila</i>                            | P(α) |        | WP_019014442.1             | 671 | LOV+Kinase+RR+HPT     | 411 |
| 143 | <i>Erythrobacter litoralis</i> HTCC2594               | P(α) | Q2NB98 | YP_457840.1                | 225 | LOV+HTH               | 412 |
|     |                                                       |      | Q2NB77 | YP_457861.1                | 346 | LOV+ Kinase           | 413 |
|     |                                                       |      | Q2N9L9 | YP_458419.1                | 362 | LOV+ Kinase           | 414 |
|     |                                                       |      | Q2NCA3 | YP_457485.1                | 360 | LOV+ Kinase           | 415 |
| 144 | <i>Erythrobacter</i> sp. NAP1                         | P(α) | A3WAQ8 | WP_007164748.1             | 358 | LOV+ Kinase           | 416 |
| 145 | <i>Erythrobacter</i> sp. SD-21                        | P(α) | A5PBU7 | WP_006833624.1             | 359 | LOV+ Kinase           | 417 |
| 146 | <i>Fulvimarina pelagi</i> HTCC2506                    | P(α) | Q0G496 | WP_007067960.1             | 420 | LOV+ Kinase           | 418 |
| 147 | <i>Gluconacetobacter europaeus</i>                    | P(α) |        | WP_019087014.1             | 213 | LOV+RR                | 419 |
| 148 | <i>Gluconobacter frateurii</i> NBRC 103465            | P(α) |        | GAD09355.1                 | 550 | LOV+Kinase+RR         | 420 |



|     |                                                                       |      |        |                               |      |                       |     |
|-----|-----------------------------------------------------------------------|------|--------|-------------------------------|------|-----------------------|-----|
| 149 | <i>Gluconobacter thailandicus</i> NBRC 3255                           | P(α) | M9M8A6 | WP_007284404.1                | 578  | LOV+Kinase+RR         | 421 |
| 150 | <i>Granulibacter thesedensis</i> CGDNIH1                              | P(α) | Q0BT22 | YP_744953.1                   | 185  | Short-LOV             | 422 |
| 151 | <i>Hyphomicrobium</i> sp. 99                                          | P(α) |        | WP_020186668.1                | 383  | LOV+Kinase            | 423 |
| 152 | <i>Ketogulonicigenium vulgare</i> str. Y25                            | P(α) | E3F4V0 | YP_003944033.1                | 483  | LOV+PAS+Kinase        | 424 |
|     | <i>Ketogulonicigenium vulgare</i> WSH-001                             | P(α) | F9YAW8 | YP_003944033.1                | 483  | LOV+PAS+Kinase        | 425 |
| 153 | <i>Labrenzia alexandrii</i> DFL-11                                    | P(α) | B9QX11 | WP_008197038.1                | 124  | Short-LOV             | 426 |
|     |                                                                       |      | B9QXR5 | WP_008189163.1                | 369  | LOV+ Kinase           | 427 |
| 154 | <i>Loktanella hongkongensis</i>                                       | P(α) |        | WP_017927856.1                | 360  | LOV+Kinase            | 428 |
|     |                                                                       |      |        | WP_017929482.1                | 330  | LOV+Kinase            | 429 |
| 155 | <i>Magnetospirillum magnetotacticum</i>                               | P(α) |        | WP_009866659.1                | 358  | LOV+Kinase            | 430 |
|     |                                                                       | P(α) |        | WP_009865584.1                | 425  | LOV+Kinase            | 431 |
| 156 | <i>Manganese-oxidizing bacterium</i> (strain SI85-9A1)                | P(α) | Q1YFS4 | WP_009210920.1                | 389  | LOV+ Kinase           | 432 |
|     | <i>Manganese-oxidizing bacterium</i> (strain SI85-9A1)                | P(α) | Q1YEU2 | WP_009211252.1                | 415  | LOV+ Kinase           | 433 |
| 157 | <i>Mesorhizobium australicum</i> LMG 24608                            | P(α) | L0KJN1 | YP_007304602.1                | 367  | LOV+Kinase            | 434 |
|     | <i>Mesorhizobium australicum</i> LMG 24609                            | P(α) | L0KP22 | YP_007305199.1                | 382  | LOV+Kinase            | 435 |
| 158 | <i>Mesorhizobium ciceri</i> bv. <i>biserrulae</i> (strain HAMBI 2942) | P(α) | E8TG50 | YP_004142370.1                | 382  | LOV+Kinase            | 436 |
| 159 | <i>Mesorhizobium loti</i>                                             | P(α) |        | WP_019859431.1                | 572  | LOV+GGDEF+EAL         | 437 |
|     |                                                                       |      |        | WP_019859046.1                | 369  | LOV+Kinase            | 438 |
| 160 | <i>Methylobacterium chloromethanicum</i> CM4                          | P(α) | B7KUQ2 | YP_002422209.1                | 533  | LOV+Kinase+RR         | 439 |
|     |                                                                       |      | B7KW67 | YP_002422352.1                | 354  | LOV+Kinase            | 440 |
|     |                                                                       |      | B7KN66 | YP_002423111.1                | 366  | LOV+Kinase            | 441 |
|     |                                                                       |      | B7KX89 | YP_002424066.1                | 890  | LOV+PAS+GAF+Kinase+RR | 442 |
|     |                                                                       |      | B7KVX8 | YP_002420722.1/YP_001639119.1 | 541  | LOV+Kinase+RR         | 443 |
|     |                                                                       |      | B7L0N0 | YP_002419681.1                | 488  | LOV+PAS+ Kinase       | 444 |
| 161 | <i>Methylobacterium extorquens</i> AM1                                | P(α) | C5B055 | YP_002962682.1/YP_001639119.1 | 541  | LOV+Kinase+RR         | 445 |
|     |                                                                       |      | C5AXM1 | YP_002964366.1                | 533  | LOV+Kinase+RR         | 446 |
|     |                                                                       |      | C5B09  | YP_002962726.1                | 492  | LOV+PAS+Kinase        | 447 |
|     |                                                                       |      | C5AYD0 | YP_002964506.1                | 354  | LOV+Kinase            | 448 |
|     |                                                                       |      | C5AVA5 | YP_002961850.1                | 488  | LOV+PAS+Kinase        | 449 |
|     |                                                                       |      | C5B328 | YP_002965335.1                | 351  | LOV+Kinase            | 450 |
|     | <i>Methylobacterium extorquens</i> DM4                                | P(α) | C7CG25 | YP_003067865.1/YP_001639119.1 | 541  | LOV+Kinase+RR         | 451 |
|     |                                                                       |      | C7CC12 | YP_003069406.1                | 533  | LOV+Kinase+RR         | 452 |
|     |                                                                       |      | C7CDA8 | YP_003066654.1                | 488  | LOV+PAS+Kinase        | 453 |
|     |                                                                       |      | C7CCX6 | YP_003069551.1                | 354  | LOV+Kinase            | 454 |
|     |                                                                       |      | C7CJE3 | YP_003070459.1                | 351  | LOV+Kinase            | 455 |
|     | <i>Methylobacterium extorquens</i> DSM 13060                          | P(α) | H1KGJ9 | EHP93379.1/YP_002961850.1     | 488  | LOV+PAS+Kinase        | 456 |
|     |                                                                       |      | H1KRD3 | WP_003604879.1                | 492  | LOV+PAS+Kinase        | 457 |
|     |                                                                       |      | H1KD56 | YP_001926756.1                | 888  | LOV+PAS+GAF+Kinase+RR | 458 |
|     |                                                                       |      | H1KIH3 | EHP92693.1/YP_001639119.1     | 541  | LOV+Kinase+RR         | 459 |
|     |                                                                       |      | H1KHY7 | WP_003599658.1                | 366  | LOV+Kinase            | 460 |
|     |                                                                       |      | H1KNL7 | EHP90884.1/YP_002964506.1     | 354  | LOV+Kinase            | 461 |
|     |                                                                       |      | H1KF02 | WP_003597944.1                | 533  | LOV+Kinase+RR         | 462 |
|     |                                                                       |      | H1KRD3 | WP_003604879.1                | 492  | LOV+PAS+Kinase        | 463 |
|     | <i>Methylobacterium extorquens</i> PA1                                | P(α) | A9VYT5 | YP_001640598.1                | 533  | LOV+Kinase+RR         | 464 |
|     |                                                                       |      | A9W705 | YP_001640738.1                | 354  | LOV+Kinase            | 465 |
|     |                                                                       |      | A9W8Q8 | YP_001641478.1                | 366  | LOV+Kinase            | 466 |
|     |                                                                       |      | A9W392 | YP_001639119.1                | 541  | LOV+Kinase+RR         | 467 |
|     |                                                                       |      | A9W12  | YP_001638351.1                | 488  | LOV+Kinase            | 468 |
| 162 | <i>Methylobacterium mesophilicum</i> SR1.6/6                          | P(α) | M7XWQ9 | WP_010687353.1                | 186  | Short-LOV             | 469 |
|     |                                                                       |      | M7XRI0 | WP_010686681.1                | 1194 | LOV+5PAS+Kinase+RR    | 470 |
|     |                                                                       |      | M7YQT1 | WP_010684528.1                | 458  | LOV+Kinase            | 471 |
|     |                                                                       |      | M7YNE8 | WP_010684883.1                | 164  | Short-LOV             | 472 |
|     |                                                                       |      | M7Y4Z9 | WP_010684081.1                | 334  | LOV+Kinase            | 473 |

|     |                                                  |               |        |                |      |                       |     |
|-----|--------------------------------------------------|---------------|--------|----------------|------|-----------------------|-----|
|     |                                                  |               | M7Y7G4 | WP_010684609.1 | 538  | LOV+Kinase+RR         | 474 |
| 163 | <i>Methylobacterium nodulans</i> ORS 2060        | P( $\alpha$ ) | B8IAH5 | YP_002501323.1 | 559  | LOV+Kinase+RR         | 475 |
|     |                                                  |               | B8IF91 | YP_002496105.1 | 814  | LOV+2PAS+Kinase+RR    | 476 |
|     |                                                  |               | B8IJ45 | YP_002502143.1 | 357  | LOV+Kinase            | 477 |
| 164 | <i>Methylobacterium populi</i> BJ001             | P( $\alpha$ ) | B1ZJK1 | YP_001926022.1 | 531  | LOV+Kinase+RR         | 478 |
|     |                                                  |               | B1Z812 | YP_001923514.1 | 488  | LOV+PAS+ Kinase       | 479 |
|     |                                                  |               | B1ZCH2 | YP_001926756.1 | 888  | LOV+PAS+GAF+Kinase+RR | 480 |
|     |                                                  |               | B1ZG87 | YP_001924280.1 | 541  | LOV+Kinase+RR         | 481 |
|     |                                                  |               | B1ZKQ8 | YP_001926163.1 | 354  | LOV+Kinase            | 482 |
|     |                                                  |               | B1ZGT9 | YP_001927152.1 | 366  | LOV+Kinase            | 483 |
|     |                                                  |               | B1ZH86 | YP_001923025.1 | 190  | Short-LOV             | 484 |
|     |                                                  |               | B1ZI10 | YP_001923031.1 | 901  | LOV+3PAS+GAF+Kinase   | 485 |
| 165 | <i>Methylobacterium radiotolerans</i> ATCC 27329 | P( $\alpha$ ) | B1M4A2 | YP_001757080.1 | 186  | Short-LOV             | 486 |
|     |                                                  |               | B1LWD2 | YP_001753317.1 | 334  | LOV+ Kinase           | 487 |
|     |                                                  |               | B1LUV7 | YP_001756226.1 | 539  | LOV+Kinase+RR         | 488 |
|     |                                                  |               | B1M51  | YP_001757160.1 | 164  | Short-LOV             | 489 |
|     |                                                  |               | B1LSK7 | YP_001755992.1 | 503  | LOV+PAS+Kinase        | 490 |
|     |                                                  |               | B1M4V9 | YP_001755688.1 | 812  | LOV+2PAS+Kinase+RR    | 491 |
| 166 | <i>Methylobacterium</i> sp. 285MFTsu5.1          | P( $\alpha$ ) |        | WP_020096052.1 | 186  | Short-LOV             | 492 |
|     |                                                  |               |        | WP_020092559.1 | 539  | LOV+Kinase+RR         | 493 |
|     |                                                  |               |        | WP_020091307.1 | 164  | Short-LOV             | 494 |
|     |                                                  |               |        | WP_020093089.1 | 495  | LOV+PAS+Kinase        | 495 |
|     |                                                  |               |        | WP_020093482.1 | 358  | LOV+Kinase            | 496 |
|     |                                                  |               |        | WP_020094544.1 | 813  | LOV+2PAS+Kinase+RR    | 497 |
| 167 | <i>Methylobacterium</i> sp. 4-46                 | P( $\alpha$ ) | B0UC38 | YP_001773223.1 | 368  | LOV+Kinase            | 498 |
|     |                                                  |               | B0UAI7 | YP_001768942.1 | 812  | LOV+2PAS+Kinase+RR    | 499 |
|     |                                                  |               | B0UDT0 | YP_001771637.1 | 544  | LOV+Kinase+RR         | 500 |
| 168 | <i>Methylobacterium</i> sp. 77                   | P( $\alpha$ ) |        | WP_019903241.1 | 540  | LOV+Kinase+RR         | 501 |
|     |                                                  |               |        | WP_019905522.1 | 421  | LOV+Kinase            | 502 |
|     |                                                  |               |        | WP_019902898.1 | 499  | LOV+PAS+Kinase        | 503 |
|     |                                                  |               |        | WP_019903195.1 | 384  | LOV+Kinase            | 504 |
|     |                                                  |               |        | WP_019903666.1 | 801  | LOV+2PAS+Kinase+RR    | 505 |
| 169 | <i>Methylobacterium</i> sp. 88A                  | P( $\alpha$ ) |        | WP_018042785.1 | 525  | LOV+Kinase+RR         | 506 |
|     |                                                  |               |        | WP_018045200.1 | 374  | LOV+Kinase            | 507 |
|     |                                                  |               |        | WP_018044613.1 | 1061 | LOV+4PAS+Kinase+RR    | 508 |
|     |                                                  |               |        | WP_018042266.1 | 506  | LOV+PAS+Kinase        | 509 |
|     |                                                  |               |        | WP_018042735.1 | 388  | LOV+Kinase            | 510 |
|     |                                                  |               |        | WP_018043311.1 | 801  | LOV+2PAS+Kinase+RR    | 511 |
| 170 | <i>Methylobacterium</i> sp. GXF4                 | P( $\alpha$ ) | I9WQP0 | WP_007566581.1 | 346  | LOV+Kinase            | 512 |
|     |                                                  |               | I9CC12 | WP_007569445.1 | 489  | LOV+Kinase            | 513 |
|     |                                                  |               | I9CG57 | WP_007567616.1 | 164  | Short-LOV             | 514 |
|     |                                                  |               | I9CKA6 | WP_007564509.1 | 807  | LOV+2PAS+Kinase+RR    | 515 |
|     |                                                  |               | I9WYU0 | WP_007560659.1 | 373  | LOV+Kinase            | 516 |
|     |                                                  |               | I9LEW2 | WP_007565725.1 | 524  | LOV+Kinase+RR         | 517 |
| 171 | <i>Methylobacterium</i> sp. MB200                | P( $\alpha$ ) |        | WP_017485058.1 | 541  | LOV+Kinase+RR         | 518 |
|     |                                                  |               |        | WP_017486386.1 | 531  | LOV+Kinase+RR         | 519 |
|     |                                                  |               |        | WP_017487214.1 | 488  | LOV+PAS+Kinase        | 520 |
|     |                                                  |               |        | WP_017484340.1 | 842  | LOV+PAS+GAF+Kinase    | 521 |
|     |                                                  |               |        | WP_017484125.1 | 351  | LOV+Kinase            | 522 |
| 172 | <i>Methylobacterium</i> sp. WSM2598              | P( $\alpha$ ) |        | WP_018263266.1 | 368  | LOV+Kinase            | 523 |
|     |                                                  |               |        | WP_018259506.1 | 544  | LOV+Kinase+RR         | 524 |
|     |                                                  |               |        | WP_018261724.1 | 802  | LOV+2PAS+Kinase+RR    | 525 |
| 173 | <i>Methylocystis parvus</i>                      | P( $\alpha$ ) |        | WP_016919364.1 | 487  | DJ-1+HTH+LOV          | 526 |

|     |                                                     |               |        |                |     |                    |     |
|-----|-----------------------------------------------------|---------------|--------|----------------|-----|--------------------|-----|
| 174 | <i>Methylocystis rosea</i>                          | P( $\alpha$ ) |        | WP_018409659.1 | 149 | Short-LOV          | 527 |
|     |                                                     |               |        | WP_018407875.1 | 488 | DJ-1+HTH+LOV       | 528 |
|     |                                                     |               |        | WP_018406994.1 | 150 | Short-LOV          | 529 |
| 175 | <i>Methylocystis</i> sp. SC2                        | P( $\alpha$ ) | J7QP72 | YP_006591864.1 | 150 | Short-LOV          | 530 |
| 176 | <i>Methylocystis</i> sp. SC3                        | P( $\alpha$ ) | J7QQR2 | YP_006590956.1 | 488 | HTH+LOV            | 531 |
| 177 | <i>Microvirga</i> sp. WSM3557                       | P( $\alpha$ ) | I4YU75 | WP_009763567.1 | 586 | LOV+Kinase+RR      | 532 |
|     |                                                     |               | I4YYC1 | WP_009491709.1 | 896 | LOV+3PAS+Kinase+RR | 533 |
| 178 | <i>Nitrosomonas</i> sp. AL212                       | P( $\alpha$ ) | F9ZGQ1 | YP_004295366.1 | 150 | Short-LOV          | 534 |
| 179 | <i>Novosphingobium aromaticivorans</i> DSM 12444    | P( $\alpha$ ) | Q2G5U0 | YP_497617.1    | 364 | LOV+ Kinase        | 535 |
|     |                                                     |               | Q2G8Z7 | YP_496510.1    | 223 | LOV+HTH            | 536 |
| 180 | <i>Novosphingobium nitrogenifigens</i> DSM 19370    | P( $\alpha$ ) | F1ZCX7 | WP_008071222.1 | 196 | LOV+RR             | 537 |
| 181 | <i>Novosphingobium</i> sp. AP12                     | P( $\alpha$ ) | J3AQP3 | WP_007676988.1 | 873 | LOV+GAF+Kinase+RR  | 538 |
|     |                                                     | P( $\alpha$ ) | J2P4S6 | WP_007687188.1 | 470 | LOV+Kinase         | 539 |
| 182 | <i>Novosphingobium</i> sp. PP1Y                     | P( $\alpha$ ) | F6ID38 | YP_004538180.1 | 193 | Short-LOV          | 540 |
| 183 | <i>Oceanibulbus indolifex</i> HEL-45                | P( $\alpha$ ) | A9DXF0 | WP_007118258.1 | 354 | LOV+ Kinase        | 541 |
| 184 | <i>Oceanicola granulosus</i>                        | P( $\alpha$ ) | Q2CIF5 | WP_007255024.1 | 341 | LOV+ Kinase        | 542 |
| 185 | <i>Oceanicola</i> sp. S124                          | P( $\alpha$ ) |        | WP_010139701.1 | 346 | LOV+Kinase         | 543 |
| 186 | <i>Ochrobactrum anthropi</i>                        | P( $\alpha$ ) |        | WP_010658851.1 | 480 | LOV+Kinase         | 544 |
|     | <i>Ochrobactrum anthropi</i> ATCC 49188             | P( $\alpha$ ) | A6X554 | YP_001372187.1 | 491 | LOV+PAS+ Kinase    | 545 |
| 187 | <i>Ochrobactrum intermedium</i> 229E                | P( $\alpha$ ) |        | ERM00762.1     | 495 | LOV+PAS+Kinase     | 546 |
|     | <i>Ochrobactrum intermedium</i> LMG 3301            | P( $\alpha$ ) | C4WLE3 | WP_006468921.1 | 495 | LOV+PAS+ Kinase    | 547 |
|     | <i>Ochrobactrum intermedium</i> M86                 | P( $\alpha$ ) | M5JPW6 | WP_006471383.1 | 491 | LOV+Kinase         | 548 |
| 188 | <i>Ochrobactrum</i> sp. CDB2                        | P( $\alpha$ ) | M3JKE0 | WP_007878669.1 | 496 | LOV+PAS+Kinase     | 549 |
| 189 | <i>Ochrobactrum</i> sp. EGD-AQ16                    | P( $\alpha$ ) |        | WP_021587245.1 | 460 | LOV+PAS+Kinase     | 550 |
| 190 | <i>Parvularcula bermudensis</i> HTCC2503            | P( $\alpha$ ) | E0TE19 | YP_003853982.1 | 367 | LOV+Kinase         | 551 |
|     |                                                     |               | E0THB6 | YP_003855348.1 | 361 | LOV+Kinase         | 552 |
| 191 | <i>Phyllobacterium</i> sp. YR531                    | P( $\alpha$ ) | J3HS51 | WP_008123941.1 | 485 | LOV+Kinase         | 553 |
| 192 | <i>Rhizobium etli</i> bv. mimosae str. Mim1         | P( $\alpha$ ) | S5S9C3 | YP_008369537.1 | 345 | LOV+Kinase         | 554 |
| 193 | <i>Rhizobium gallicum</i>                           | P( $\alpha$ ) |        | WP_018446992.1 | 325 | LOV+Kinase         | 555 |
| 194 | <i>Rhizobium giardinii</i>                          | P( $\alpha$ ) |        | WP_018327555.1 | 336 | LOV+Kinase         | 556 |
| 195 | <i>Rhizobium grahamii</i>                           | P( $\alpha$ ) |        | WP_016556202.1 | 349 | LOV+Kinase         | 557 |
| 196 | <i>Rhizobium leguminosarum</i>                      | P( $\alpha$ ) |        | WP_017991794.1 | 375 | LOV+Kinase         | 558 |
|     |                                                     |               |        | WP_017996607.1 | 375 | LOV+Kinase         | 559 |
|     |                                                     |               |        | WP_018068093.1 | 345 | LOV+Kinase         | 560 |
|     |                                                     |               |        | WP_017959402.1 | 345 | LOV+Kinase         | 561 |
|     |                                                     |               |        | WP_017997493.1 | 342 | LOV+Kinase         | 562 |
|     |                                                     |               |        | WP_017992121.1 | 345 | LOV+Kinase         | 563 |
|     |                                                     |               |        | WP_018485836.1 | 345 | LOV+Kinase         | 564 |
|     |                                                     |               |        | WP_018496455.1 | 345 | LOV+Kinase         | 565 |
| 197 | <i>Rhizobium leguminosarum</i> bv. viciae 3841      | P( $\alpha$ ) | Q1M667 | YP_771353.1    | 345 | LOV+ Kinase        | 566 |
| 198 | <i>Rhizobium leguminosarum</i> bv. trifolii WSM1325 | P( $\alpha$ ) | C6B8Y  | YP_002978926.1 | 342 | LOV+ Kinase        | 567 |
|     |                                                     |               | C6B7A8 | YP_002984928.1 | 375 | LOV+ Kinase        | 568 |
| 199 | <i>Rhizobium leguminosarum</i> bv. trifolii WSM2297 | P( $\alpha$ ) | J0WGH8 | WP_003575436.1 | 345 | LOV+Kinase         | 569 |
| 200 | <i>Rhizobium leguminosarum</i> bv. trifolii WSM2304 | P( $\alpha$ ) | B6A1G8 | YP_002279192.1 | 345 | LOV+ Kinase        | 570 |
| 201 | <i>Rhizobium leguminosarum</i> bv. trifolii WSM597  | P( $\alpha$ ) | J0H7F5 | WP_003591079.1 | 345 | LOV+Kinase         | 571 |
| 202 | <i>Rhizobium leguminosarum</i> bv. viciae WSM1455   | P( $\alpha$ ) | J0BMT6 | WP_003548985.1 | 345 | LOV+Kinase         | 572 |
|     |                                                     | P( $\alpha$ ) | J0BMD1 | WP_003548626.1 | 375 | LOV+Kinase         | 573 |
| 203 | <i>Rhizobium lupini</i> HPC(L)                      | P( $\alpha$ ) | K5C4K8 | WP_006697873.1 | 369 | LOV+Kinase         | 574 |
| 204 | <i>Rhizobium</i> sp. 2MFC03.1                       | P( $\alpha$ ) |        | WP_018901391.1 | 205 | Short-LOV          | 575 |
|     |                                                     |               |        | WP_018901378.1 | 369 | LOV+Kinase         | 576 |
|     |                                                     |               |        | WP_018899439.1 | 476 | LOV+PAS+Kinase     | 577 |
|     |                                                     |               |        | WP_018901815.1 | 482 | LOV+PAS+Kinase     | 578 |
| 205 | <i>Rhizobium</i> sp. CF080                          | P( $\alpha$ ) | J3CCW4 | WP_007757319.1 | 349 | LOV+Kinase         | 579 |

|     |                                                |      |        |                            |     |                        |     |
|-----|------------------------------------------------|------|--------|----------------------------|-----|------------------------|-----|
|     |                                                |      | J2IVB7 | WP_007767523.1             | 375 | LOV+Kinase             | 580 |
| 206 | <i>Rhizobium</i> sp. JGI 0001005-K05           | P(α) |        | WP_018116037.1             | 365 | LOV+Kinase             | 581 |
|     |                                                |      |        | WP_018114278.1             | 387 | LOV+Kinase             | 582 |
| 207 | <i>Rhizobium tropici</i> CIAT 899              | P(α) | L0LP99 | YP_007335729.1             | 368 | LOV+Kinase             | 583 |
| 208 | <i>Rhodobacter</i> sp. AKP1                    | P(α) | L1KCG9 | YP_352285.1                | 176 | Short-LOV              | 584 |
|     |                                                |      | L1K6L9 | WP_009565994.1             | 944 | PAS+LOV+PAS+Kinase+RR  | 585 |
| 209 | <i>Rhodobacter sphaeroides</i> ATCC 17023      | P(α) | Q3J0K0 | YP_353585.1                | 945 | PAS+LOV+PAS+Kinase+RR  | 586 |
|     |                                                |      | Q3J4A0 | YP_352285.1                | 176 | Short-LOV              | 587 |
| 210 | <i>Rhodobacter sphaeroides</i> ATCC 17029      | P(α) | A3PLQ1 | YP_001044039.1             | 941 | PAS+LOV+2PAS+Kinase+RR | 588 |
|     |                                                |      | A3PI49 | YP_001042787.1/YP_352285.1 | 176 | Short-LOV              | 589 |
| 211 | <i>Rhodobacter sphaeroides</i> KD131           | P(α) | B9KKQ9 | YP_002526207.1             | 941 | PAS+LOV+PAS+Kinase+RR  | 590 |
|     |                                                |      | B9KPB3 | YP_002524907.1/YP_352285.1 | 176 | Short-LOV              | 591 |
| 212 | <i>Rhodobacter sphaeroides</i> WS8N            | P(α) | F5M486 | WP_002720676.1             | 945 | PAS+LOV+Kinase+RR      | 592 |
| 213 | <i>Rhodospirillum centenum</i> ATCC 51521 / SW | P(α) | B6IQQ9 | YP_002296608.1             | 368 | LOV+ Kinase            | 593 |
| 214 | <i>Roseobacter denitrificans</i> OCh 114       | P(α) | Y167W8 | YP_682411.1                | 350 | LOV+ Kinase            | 594 |
| 215 | <i>Roseobacter litoralis</i> DSM 6996          | P(α) | F7ZD60 | YP_004690232.1             | 350 | LOV+Kinase             | 595 |
| 216 | <i>Roseobacter</i> sp. CCS2                    | P(α) | A4EHF4 | WP_008232737.1             | 175 | Short-LOV              | 596 |
|     |                                                |      | A4EIJ8 | WP_008233475.1             | 181 | Short-LOV              | 597 |
| 217 | <i>Roseomonas cervicalis</i> ATCC 49957        | P(α) | D5RKE3 | WP_007004777.1             | 537 | LOV+Kinase+RR          | 598 |
| 218 | <i>Roseomonas</i> sp. B5                       | P(α) |        | WP_019461164.1             | 807 | LOV+2PAS+Kinase+RR     | 599 |
| 219 | <i>Roseovarius</i> sp. HTCC2601                | P(α) | Q0FR10 | WP_007797918.1             | 182 | Short-LOV              | 600 |
| 220 | <i>Rubellimicrobium thermophilum</i> DSM 16684 | P(α) | S9SB69 | WP_021096554.1             | 349 | LOV+Kinase             | 601 |
| 221 | <i>Ruegeria</i> sp. R11                        | P(α) | B7QQ97 | WP_008562686.1             | 194 | Short-LOV              | 602 |
| 222 | <i>Sagittula stellata</i> E-37                 | P(α) | A3K7J  | WP_005861688.1             | 169 | Short-LOV              | 603 |
| 223 | <i>Salipiger mucosus</i>                       | P(α) |        | WP_020039151.1             | 182 | Short-LOV              | 604 |
| 224 | <i>Sphingobium baderi</i> LL03                 | P(α) | T0GNC9 | WP_021244768.1             | 868 | LOV+PAS+GAF+Kinase     | 605 |
| 225 | <i>Sphingobium indicum</i> B90A                | P(α) | I5BEG6 | WP_007685143.1             | 572 | LOV+Kinase+RR          | 606 |
| 226 | <i>Sphingobium japonicum</i>                   | P(α) |        | WP_006948855.1             | 195 | LOV+RR                 | 607 |
| 227 | <i>Sphingobium lactosutens</i> DS20            | P(α) | T0IZE5 | WP_021224791.1             | 201 | LOV+RR                 | 608 |
|     |                                                |      | T0HKJ8 | WP_021227208.1             | 592 | LOV+Kinase+RR          | 609 |
|     |                                                |      |        | EQB17255.1                 | 201 | LOV+RR                 | 610 |
| 228 | <i>Sphingobium ummariense</i> RL-3             | P(α) | T0KBW2 | WP_021316219.1             | 572 | LOV+Kinase+RR          | 611 |
| 229 | <i>Sphingobium xenophagum</i>                  | P(α) |        | WP_017181268.1             | 582 | LOV+Kinase+RR          | 612 |
|     |                                                |      |        | WP_019051957.1             | 190 | LOV+RR                 | 613 |
|     |                                                |      |        | WP_017181670.1             | 190 | LOV+RR                 | 614 |
| 230 | <i>Sphingobium yanoikuyae</i>                  | P(α) |        | WP_010336618.1             | 185 | Short-LOV              | 615 |
|     | <i>Sphingobium yanoikuyae</i> ATCC 51230       | P(α) | K9DDM0 | WP_004210595.1             | 460 | LOV+Kinase             | 616 |
|     |                                                |      | K9DBT8 | WP_004209647.1             | 196 | LOV+RR                 | 617 |
|     |                                                |      | K9CRY6 | WP_004209577.1             | 185 | Short-LOV              | 618 |
|     |                                                |      | K9CZR2 | WP_004208793.1             | 866 | LOV+PAS+GAF+Kinase+RR  | 619 |
| 231 | <i>Sphingomonas echinoides</i>                 | P(α) |        | WP_010406583.1             | 870 | LOV+PAS+GAF+Kinase+RR  | 620 |
| 232 | <i>Sphingomonas elodea</i>                     | P(α) |        | WP_010544137.1             | 568 | LOV+Kinase+RR          | 621 |
|     |                                                |      |        | WP_010545569.1             | 193 | LOV+RR                 | 622 |
| 233 | <i>Sphingomonas melonis</i>                    | P(α) |        | WP_020486392.1             | 488 | LOV+PAS+Kinase         | 623 |
|     |                                                |      |        | WP_018250488.1             | 496 | LOV+PAS+Kinase         | 624 |
|     |                                                |      |        | WP_020493474.1             | 586 | LOV+Kinase+RR          | 625 |
|     |                                                |      |        | WP_018250616.1             | 569 | LOV+Kinase+RR          | 626 |
| 234 | <i>Sphingomonas</i> sp. ATCC 31555             | P(α) |        | WP_019369245.1             | 569 | LOV+PAS+Kinase         | 627 |
|     |                                                |      |        | WP_019369958.1             | 195 | LOV+RR                 | 628 |
| 235 | <i>Sphingomonas</i> sp. KC8                    | P(α) |        | WP_010126430.1             | 191 | LOV+RR                 | 629 |
| 236 | <i>Sphingomonas</i> sp. LH128                  | P(α) | J8VLA8 | WP_008831260.1             | 184 | Short-LOV              | 630 |
|     |                                                |      | J8VSB8 | WP_008829154.1             | 186 | Short-LOV              | 631 |
| 237 | <i>Sphingomonas</i> sp. Mn802worker            | P(α) |        | WP_019517892.1             | 547 | LOV+Kinase+RR          | 632 |

|     |                                                |      |        |                |      |                             |     |
|-----|------------------------------------------------|------|--------|----------------|------|-----------------------------|-----|
|     |                                                |      |        | WP_019515952.1 | 374  | LOV+Kinase                  | 633 |
| 238 | <i>Sphingomonas</i> sp. PAMC 26605             | P(α) |        | WP_010185187.1 | 368  | LOV+Kinase                  | 634 |
|     |                                                |      |        | WP_010183492.1 | 207  | LOV+RR                      | 635 |
| 239 | <i>Sphingomonas</i> sp. PAMC 26617             | P(α) |        | WP_010164100.1 | 536  | LOV+Kinase+RR               | 636 |
|     |                                                |      |        | WP_010165385.1 | 207  | LOV+RR                      | 637 |
|     |                                                |      |        | WP_010162859.1 | 849  | PAS+LOV+GAF+Kinase+RR       | 638 |
|     |                                                |      |        | WP_010162636.1 | 207  | LOV+RR                      | 639 |
|     |                                                |      |        | WP_010161173.1 | 557  | LOV+Kinase+RR               | 640 |
| 240 | <i>Sphingomonas</i> sp. PAMC 26621             | P(α) |        | WP_010215598.1 | 207  | LOV+RR                      | 641 |
|     |                                                |      |        | WP_010217310.1 | 536  | LOV+Kinase+RR               | 642 |
| 241 | <i>Sphingomonas</i> sp. S17                    | P(α) | F3WVL3 | WP_007404345.1 | 155  | Short-LOV                   | 643 |
|     |                                                | P(α) | F3WVM0 | WP_007404471.1 | 524  | LOV+Kinase+RR               | 644 |
| 242 | <i>Sphingomonas</i> sp. SKA58                  | P(α) | Q1N7J1 | WP_009822011.1 | 238  | LOV+HTH                     | 645 |
|     |                                                |      | Q1NI33 | WP_009823476.1 | 570  | LOV+Kinase+RR               | 646 |
| 243 | <i>Sphingopyxis</i> alaskensis RB2256          | P(α) | Q1GUF5 | YP_616050.1    | 195  | LOV+HTH                     | 647 |
| 244 | <i>Sphingopyxis</i> sp. MC1                    | P(α) | N9WD00 | WP_003043817.1 | 566  | LOV+GGDEF+EAL               | 648 |
|     |                                                |      | N9UPB3 | WP_003050900.1 | 195  | LOV+RR                      | 649 |
| 245 | <i>Wenxinia</i> marina                         | P(α) |        | WP_018301439.1 | 178  | Short-LOV                   | 650 |
| 246 | <i>Accumulibacter</i> phosphatis (strain UW-1) | P(β) | C7RJT7 | YP_003168707.1 | 143  | Short-LOV                   | 651 |
| 247 | <i>Acidovorax</i> avenae                       | P(β) |        | WP_019702225.1 | 544  | LOV+Kinase+RR               | 652 |
|     | <i>Acidovorax</i> avenae DSM 7227              | P(β) | F0QBL7 | YP_004235943.1 | 544  | LOV+Kinase+RR               | 653 |
| 248 | <i>Acidovorax</i> avenae sub. citrulli AAC00-1 | P(β) | A1TT27 | YP_971889.1    | 544  | LOV+Kinase+RR               | 654 |
| 249 | <i>Aromatoleum</i> aromaticum EbN1             | P(β) | Q5P4K8 | YP_158656.1    | 698  | Globin+LOV+GGDEF+EAL        | 655 |
| 250 | <i>Blood</i> disease bacterium R229            | P(β) | G2ZKN6 | CCA79599.1     | 1178 | 3PAS+LOV+GGDEF              | 656 |
| 251 | <i>Burkholderia</i> bryophila                  | P(β) |        | WP_020069641.1 | 1058 | 2PAS+LOV+GGDEF+EAL          | 657 |
| 252 | <i>Burkholderia</i> graminis C4D1M             | P(β) | B1FWL0 | WP_006047954.1 | 1036 | PAS+PAS+LOV+ GGDEF+EAL      | 658 |
| 253 | <i>Burkholderia</i> kururiensis                | P(β) |        | WP_017772705.1 | 1038 | 2PAS+LOV+GGDEF+EAL          | 659 |
| 254 | <i>Burkholderia</i> phenoliruptrix BR3459a     | P(β) | K0DLX0 | YP_006832691.1 | 1036 | 2PAS+LOV+GGDEF+EAL          | 660 |
| 255 | <i>Burkholderia</i> phymatum STM815            | P(β) | B2JFQ7 | YP_001858578.1 | 533  | LOV+Kinase+RR               | 661 |
|     |                                                |      | B2JCW5 | YP_001856630.1 | 1040 | 2PAS+LOV+GGDEF+EAL          | 662 |
| 256 | <i>Burkholderia</i> phytofirmans PsJN          | P(β) | B2SX52 | YP_001894315.1 | 1036 | PAS+PAS+LOV+ GGDEF+EAL      | 663 |
| 257 | <i>Burkholderia</i> sp. BT03                   | P(β) | J3AY22 | WP_007745224.1 | 1040 | 2PAS+LOV+GGDEF+EAL          | 664 |
|     |                                                |      | J2IBD0 | WP_007737745.1 | 533  | LOV+Kinase+RR               | 665 |
| 258 | <i>Burkholderia</i> sp. CCGE 1002              | P(β) | D5WBG3 | YP_003604003.1 | 1055 | 2PAS+LOV+GGDEF+EAL          | 666 |
| 259 | <i>Burkholderia</i> sp. CCGE 1003              | P(β) | E1T757 | YP_003905686.1 | 1036 | 2PAS+LOV+GGDEF+EAL          | 667 |
| 260 | <i>Burkholderia</i> sp. CCGE1001               | P(β) | E8YMJ9 | YP_004226904.1 | 1036 | 2PAS+LOV+GGDEF+EAL          | 668 |
| 261 | <i>Burkholderia</i> sp. Ch1-1                  | P(β) | I2ICW6 | WP_007179328.1 | 1036 | 2PAS+LOV+GGDEF+EAL          | 669 |
| 262 | <i>Burkholderia</i> sp. H160                   | P(β) | B5WM15 | WP_008921106.1 | 1028 | PAS+PAS+LOV+ GGDEF+EAL      | 670 |
| 263 | <i>Burkholderia</i> sp. JPY251                 | P(β) |        | WP_018431938.1 | 1055 | 2PAS+LOV+GGDEF+EAL          | 671 |
| 264 | <i>Burkholderia</i> sp. RPE64                  | P(β) |        | YP_008036462.1 | 1058 | PAS+LOV+PAS+GGDEF+EAL       | 672 |
| 265 | <i>Burkholderia</i> sp. SJ98                   | P(β) | K8R5H1 | WP_008351594.1 | 1032 | 2PAS+LOV+GGDEF+EAL          | 673 |
|     |                                                |      | K8RBL1 | WP_008348805.1 | 950  | PAS+LOV+GGDEF+EAL           | 674 |
|     |                                                |      | K8RFA8 | WP_008344710.1 | 403  | LOV+Kinase                  | 675 |
| 266 | <i>Burkholderia</i> sp. WSM4176                | P(β) |        | WP_018419411.1 | 1062 | 2PAS+LOV+GGDEF+EAL          | 676 |
| 267 | <i>Burkholderia</i> sp. YI23                   | P(β) | G8M3Y7 | YP_004976128.1 | 1040 | 2PAS+LOV+GGDEF+EAL          | 677 |
| 268 | <i>Burkholderia</i> terrae BS001               | P(β) | I5D017 | WP_007579791.1 | 1040 | 2PAS+LOV+GGDEF+EAL          | 678 |
|     |                                                |      | I5CKV7 | WP_007589128.1 | 192  | Short-LOV                   | 679 |
| 269 | <i>Burkholderia</i> xenovorans LB400           | P(β) | Q145M2 | YP_557019.1    | 1036 | PAS+PAS+LOV+ GGDEF+EAL      | 680 |
| 270 | <i>Burkholderiales</i> bacterium JOSHI_001     | P(β) | H5WRX6 | WP_009553309.1 | 875  | LOV+Kinase+GGDEF+HAMP       | 681 |
| 271 | <i>Caldimonas</i> manganoxidans                | P(β) |        | WP_019559344.1 | 1200 | GAF+2PAS+LOV+2PAS+Kinase+RR | 682 |
| 272 | <i>Comamonas</i> testosteroni                  | P(β) |        | WP_019042804.1 | 443  | LOV+GGDEF                   | 683 |
|     | <i>Comamonas</i> testosteroni CNB-2            | P(β) | D0J0D1 | YP_003278898.1 | 458  | LOV+PAS+GGDEF               | 684 |
|     | <i>Comamonas</i> testosteroni S44              | P(β) | D8D2C5 | WP_003062841.1 | 435  | PAS+LOV+GGDEF               | 685 |



|     |                                                  |      |        |                |      |                              |     |
|-----|--------------------------------------------------|------|--------|----------------|------|------------------------------|-----|
| 273 | <i>Duganella zoogloeoides</i>                    | P(β) |        | WP_019924259.1 | 560  | LOV+Kinase+RR                | 686 |
| 274 | <i>Herbaspirillum frisingense GSF30</i>          | P(β) | R0FWK0 | WP_006462257.1 | 546  | LOV+Kinase+RR                | 687 |
| 275 | <i>Herbaspirillum seropedicae</i>                | P(β) |        | WP_017453457.1 | 546  | LOV+Kinase+RR                | 688 |
|     | <i>Herbaspirillum seropedical (strain SmR1)</i>  | P(β) | D8IWD2 | YP_003775860.1 | 552  | LOV+Kinase+RR                | 689 |
| 276 | <i>Herbaspirillum sp. GW103</i>                  | P(β) | I3CVK0 | WP_008329090.1 | 546  | LOV+Kinase+RR                | 690 |
| 277 | <i>Herbaspirillum sp. JC206</i>                  | P(β) |        | WP_019142500.1 | 585  | LOV+Kinase+RR                | 691 |
| 278 | <i>Herbaspirillum sp. YR522</i>                  | P(β) | J2UWT8 | WP_008118789.1 | 549  | LOV+Kinase+RR                | 692 |
| 279 | <i>Herminiimonas arsenicoxydans</i>              | P(β) | A4G2U1 | YP_001098955.1 | 944  | CHASE+LOV+GGDEF+EAL          | 693 |
|     |                                                  |      | A4G7R2 | YP_001100670.1 | 313  | LOV+GGDEF                    | 694 |
|     |                                                  |      | A4G3M6 | YP_001099240.1 | 818  | RR+PAS+LOV+GGDEF+EAL         | 695 |
| 280 | <i>Janthinobacterium sp. CG3</i>                 | P(β) |        | WP_017876122.1 | 1107 | CHASE+LOV+GGDEF+EAL+RR       | 696 |
|     |                                                  |      |        | WP_017876665.1 | 986  | PAS+LOV+GGDEF+EAL+RR         | 697 |
| 281 | <i>Lutiella nitroferum 2002</i>                  | P(β) | B9Z647 | WP_008955033.1 | 1072 | RR+GAF+PAS+LOV+GGDEF+EAL     | 698 |
| 282 | <i>Massilia niastensis</i>                       | P(β) |        | WP_020651816.1 | 562  | LOV+Kinase+RR                | 699 |
| 283 | <i>Massilia timonae CCUG 45783</i>               | P(β) | K9DG25 | WP_005665462.1 | 569  | LOV+Kinase+RR                | 700 |
| 284 | <i>Methylobium petroleiphilum PM1</i>            | P(β) | A2SIR0 | YP_001021684.1 | 1317 | GAF+3PAS+LOV+2PAS+Kinase+ RR | 701 |
| 285 | <i>Methylovorus sp. SIP3-4</i>                   | P(β) | C6X7I8 | YP_003051980.1 | 821  | RR+PAS+LOV+GGDEF+EAL         | 702 |
| 286 | <i>Methylovorus sp.str. MP688</i>                | P(β) | E4QL91 | YP_004040548.1 | 821  | RR+PAS+LOV+GGDEF+EAL         | 703 |
| 287 | <i>Nitrosomonas sp. (strain Is79A3)</i>          | P(β) | F8GDY9 | YP_004695500.1 | 150  | Short-LOV                    | 704 |
| 288 | <i>Nitrosomonas sp. AL212</i>                    | P(β) | F9ZGQ1 | YP_004295366.1 | 150  | Short-LOV                    | 705 |
| 289 | <i>Nitrospira multiformis ATCC 25196</i>         | P(β) | Q2Y837 | YP_412476.1    | 152  | Short-LOV                    | 706 |
| 290 | <i>Nitrospira sp. APG3</i>                       | P(β) | M5DIF4 | WP_004176761.1 | 157  | Short-LOV                    | 707 |
| 291 | <i>Oxalobacteraceae bacterium IMCC 9480</i>      | P(β) | F1VZT5 | WP_009666397.1 | 526  | LOV+PAS+Kinase               | 708 |
| 292 | <i>Polaromonas naphthalenivorans CJ2</i>         | P(β) | A1VS30 | YP_983379.1    | 389  | LOV+ Kinase                  | 709 |
| 293 | <i>Pseudogulbenkiania sp. (strain NH8B)</i>      | P(β) | G2IXN9 | YP_004848386.1 | 1072 | RR+GAF+PAS+LOV+GGDEF+EAL     | 710 |
| 294 | <i>Ralstonia solanacearum</i>                    | P(β) | B5RXV5 | WP_003274043.1 | 1178 | Hamp+2PAS+LOV+GGDEF+EAL      | 711 |
|     |                                                  |      |        | WP_019719220.1 | 1178 | Hamp+2PAS+LOV+GGDEF+EAL      | 712 |
|     |                                                  |      | D8P2A9 | YP_003747462.1 | 1178 | Hamp+2PAS+LOV+GGDEF+EAL      | 713 |
|     |                                                  |      | B5SBH9 | YP_002257212.1 | 1178 | Hamp+2PAS+LOV+GGDEF+EAL      | 714 |
|     | <i>Ralstonia solanacearum CMR15</i>              | P(β) | D8NG57 | YP_006060163.1 | 1178 | Hamp+2PAS+LOV+GGDEF+EAL      | 715 |
|     | <i>Ralstonia solanacearum FQY_4</i>              | P(β) | M4UIH4 | YP_008237427.1 | 1178 | Hamp+2PAS+LOV+GGDEF+EAL      | 716 |
|     | <i>Ralstonia solanacearum GMI1000</i>            | P(β) | Q8XT61 | NP_521815.1    | 1178 | HAMP+2PAS+LOV+GGDEF+EAL      | 717 |
|     | <i>Ralstonia solanacearum PSI07</i>              | P(β) | D8MYZ9 | YP_003749222.1 | 1178 | 3PAS+LOV+GGDEF+EAL           | 718 |
|     | <i>Ralstonia solanacearum SD54</i>               | P(β) | S7XX18 | WP_021155319.1 | 1178 | Hamp+2PAS+LOV+GGDEF+EAL      | 719 |
|     | <i>Ralstonia solanacearum str. Po82</i>          | P(β) | F6G7G0 | YP_006031432.1 | 1234 | HAMP+PAS+LOV+GGDEF+EAL       | 720 |
|     | <i>Ralstonia solanacearum UW551</i>              | P(β) | A3RWI2 | WP_003264369.1 | 1234 | HAMP+2PAS+LOV+GGDEF+EAL      | 721 |
| 295 | <i>Ralstonia sp. AU12-08</i>                     | P(β) | S9S0D4 | WP_021192980.1 | 1201 | Hamp+PAS+LOV+GGDEF+EAL       | 722 |
| 296 | <i>Ralstonia sp. PBA</i>                         | P(β) | I9W2M2 | WP_009523483.1 | 688  | PAS+LOV+GGDEF+EAL            | 723 |
| 297 | <i>Ralstonia syzygii R24</i>                     | P(β) | G3A8G2 | CCA87536.1     | 1178 | 3PAS+LOV+GGDEF               | 724 |
| 298 | <i>Ramlibacter tataouinensis DSM14655</i>        | P(β) | F5Y2K4 | YP_004618386.1 | 537  | LOV+Kinase+RR                | 725 |
| 299 | <i>Rubrivivax benzoatilyticus JA2</i>            | P(β) | F3LSW2 | WP_009857995.1 | 687  | LOV+PAS+GGDEF+EAL            | 726 |
|     |                                                  | P(β) | F3LLJ8 | WP_009855783.1 | 856  | 2PAS+LOV+PAS+Kinase          | 727 |
| 300 | <i>Rubrivivax gelatinosus NBRC 100245</i>        | P(β) | I0HXU9 | YP_005439335.1 | 877  | Hamp+PAS+LOV+Kinase          | 728 |
|     | <i>Rubrivivax gelatinosus NBRC 100246</i>        | P(β) | I0HQ12 | YP_005436598.1 | 737  | LOV+PAS+GGDEF+EAL            | 729 |
| 301 | <i>Sulfuricella denitrificans skB26</i>          | P(β) | S6AL83 | YP_008546461.1 | 698  | LOV+PAS+GGDEF+EAL            | 730 |
|     |                                                  |      | S6AFR8 | YP_008545773.1 | 677  | LOV+PAS+GGDEF+EAL            | 731 |
| 302 | <i>Thauera phenylacetica B4P</i>                 | P(β) | N6ZRB5 | WP_004362938.1 | 864  | HAMP+PAS+LOV+PAS+Kinase      | 732 |
|     |                                                  |      | N6ZXB3 | WP_004364285.1 | 954  | HAMP+2PAS+LOV+PAS+Kinase     | 733 |
|     |                                                  |      | N6YKT8 | WP_004382816.1 | 738  | Globin+LOV+GGDEF+EAL         | 734 |
| 303 | <i>Thauera sp. 27</i>                            | P(β) | N6XKW8 | WP_002937138.1 | 1133 | Hamp+2PAS+LOV+PAS+Kinase     | 735 |
| 304 | <i>Acidithiobacillus caldus ATCC 51756</i>       | P(γ) | C6NR21 | WP_004867363.1 | 913  | GAF+LOV+PAS+GGDEF+EAL        | 736 |
|     | <i>Acidithiobacillus caldus str. SM-1</i>        | P(γ) | F9ZQB1 | YP_004747583.1 | 913  | GAF+LOV+PAS+GGDEF+EAL        | 737 |
| 305 | <i>Acidithiobacillus ferrooxidans ATCC 23270</i> | P(γ) | B7JB43 | YP_002426126.1 | 1057 | GAF+LOV+PAS+GAF+GGDEF+EAL    | 738 |

|     |                                                                     |      |        |                           |      |                              |     |
|-----|---------------------------------------------------------------------|------|--------|---------------------------|------|------------------------------|-----|
| 306 | <i>Acidithiobacillus</i> sp. GGI-221                                | P(y) | F8XM97 | WP_009561169.1            | 677  | LOV+PAS+GAF+GGDEF            | 739 |
| 307 | <i>Acinetobacter</i> <i>brisouii</i> ANC 4119                       | P(y) | N9AXM2 | WP_004898317.1            | 859  | GAF+PAS+LOV+GGDEF+EAL        | 740 |
| 308 | <i>Acinetobacter</i> <i>lwoffii</i> SH145                           | P(y) | D0SWD2 | WP_004280312.1            | 859  | GAF+LOV+PAS+GGDEF+EAL        | 741 |
|     | <i>Acinetobacter</i> <i>lwoffii</i>                                 | P(y) |        | WP_016806740.1            | 859  | GAF+LOV+PAS+GGDEF+EAL        | 742 |
|     |                                                                     |      |        | WP_016806740.1            | 859  | GAF+PAS+LOV+GGDEF+EAL        | 743 |
|     | <i>Acinetobacter</i> <i>lwoffii</i> CIP 70.31                       | P(y) | N9H487 | WP_005100328.1            | 537  | LOV+GGDEF+EAL                | 744 |
|     | <i>Acinetobacter</i> <i>lwoffii</i> NCTC 5866 = CIP 64.10           | P(y) | N9H4F1 | WP_005096907.1            | 859  | GAF+PAS+LOV+GGDEF+EAL        | 745 |
|     | <i>Acinetobacter</i> <i>lwoffii</i> NIPH 478                        | P(y) | N9HNY3 | WP_005106935.1            | 859  | GAF+PAS+LOV+GGDEF+EAL        | 746 |
|     |                                                                     |      | N9HEH7 | WP_005107680.1            | 864  | PAS+LOV+GGDEF+EAL            | 747 |
|     | <i>Acinetobacter</i> <i>lwoffii</i> NIPH 715                        | P(y) | N8TVY4 | WP_004730980.1            | 859  | GAF+PAS+LOV+GGDEF+EAL        | 748 |
| 309 | <i>Acinetobacter</i> <i>radioresistens</i> DSM 6976                 | P(y) | K6W2B6 | WP_005026623.1            | 855  | GAF+PAS+LOV+GGDEF+EAL        | 749 |
|     | <i>Acinetobacter</i> <i>radioresistens</i> NIPH 2130                | P(y) | N9CGQ6 | WP_005019674.1            | 855  | GAF+PAS+LOV+GGDEF+EAL        | 750 |
|     | <i>Acinetobacter</i> <i>radioresistens</i> SH164                    | P(y) | D0T5K2 | WP_005019674.1            | 855  | GAF+PAS+LOV+GGDEF            | 751 |
|     | <i>Acinetobacter</i> <i>radioresistens</i> SK82                     | P(y) | C6RJR5 | EET83911.1/WP_005019674.1 | 855  | GAF+PAS+LOV+GGDEF+EAL        | 752 |
|     | <i>Acinetobacter</i> <i>radioresistens</i> WC-A-157                 | P(y) | J4R2N6 | WP_005406298.1            | 855  | GAF+PAS+LOV+GGDEF+EAL        | 753 |
| 310 | <i>Acinetobacter</i> sp. ANC 3789                                   | P(y) | N8VFZ2 | WP_004749596.1            | 854  | GAF+PAS+LOV+GGDEF+EAL        | 754 |
|     |                                                                     |      | N8VCG8 | WP_004751822.1            | 846  | GAF+PAS+LOV+GGDEF+EAL        | 755 |
| 311 | <i>Acinetobacter</i> sp. ANC 3994                                   | P(y) | N8NWV8 | WP_004649263.1            | 861  | GAF+PAS+LOV+GGDEF+EAL        | 756 |
| 312 | <i>Acinetobacter</i> sp. CIP 101966                                 | P(y) | N9QD69 | WP_005262929.1            | 859  | GAF+PAS+LOV+GGDEF+EAL        | 757 |
| 313 | <i>Acinetobacter</i> sp. CIP 102136                                 | P(y) | N9PS41 | WP_005251802.1            | 859  | GAF+PAS+LOV+GGDEF+EAL        | 758 |
| 314 | <i>Acinetobacter</i> sp. CIP 51.11                                  | P(y) | N9PKC5 | WP_005246324.1            | 859  | GAF+PAS+LOV+GGDEF+EAL        | 759 |
| 315 | <i>Acinetobacter</i> sp. CIP 53.82                                  | P(y) | N9ML36 | WP_005177235.1            | 857  | GAF+PAS+LOV+GGDEF+EAL        | 760 |
| 316 | <i>Acinetobacter</i> sp. CIP 64.7                                   | P(y) | N9QK63 | WP_005266388.1            | 859  | GAF+PAS+LOV+GGDEF+EAL        | 761 |
| 317 | <i>Acinetobacter</i> sp. CIP A162                                   | P(y) | N8Q6A8 | WP_004646969.1            | 859  | GAF+PAS+LOV+GGDEF+EAL        | 762 |
| 318 | <i>Acinetobacter</i> sp. MDS7A                                      | P(y) |        | WP_019837897.1            | 857  | GAF+LOV+PAS+GGDEF+EAL        | 763 |
| 319 | <i>Acinetobacter</i> sp. NIPH 2171                                  | P(y) | N9MLY1 | WP_005234449.1            | 850  | GAF+PAS+LOV+GGDEF+EAL        | 764 |
| 320 | <i>Acinetobacter</i> sp. NIPH 713                                   | P(y) | N9KQ40 | WP_005170912.1            | 861  | GAF+PAS+LOV+GGDEF+EAL        | 765 |
| 321 | <i>Acinetobacter</i> sp. NIPH 899                                   | P(y) | N8VGG5 | WP_004783140.1            | 821  | GAF+PAS+LOV+GGDEF+EAL        | 766 |
| 322 | <i>Algicola</i> <i>sagamiensis</i>                                  | P(y) |        | WP_018692423.1            | 320  | LOV+GGDEF                    | 767 |
| 323 | <i>Aliivibrio</i> <i>fischeri</i> ( <i>Vibrio</i> <i>fischeri</i> ) | P(y) |        | WP_017019105.1            | 631  | LOV+GGDEF                    | 768 |
| 324 | <i>Alishewanella</i> <i>agri</i> BL06                               | P(y) | I9DPX4 | WP_008985345.1            | 1590 | PAS+GAF+PAS+LOV+GGDEF+EAL+RR | 769 |
| 325 | <i>Alishewanella</i> <i>jeotgali</i> KCTC 22429                     | P(y) | H3ZFV5 | WP_008950907.1            | 1590 | PAS+GAF+PAS+LOV+GGDEF+EAL+RR | 770 |
| 326 | <i>Alteromonas</i> <i>macleodii</i> AltDE1                          | P(y) | K7RA87 | YP_006975689.1            | 959  | PAS+LOV+Kinase+RR            | 771 |
|     | <i>Alteromonas</i> <i>macleodii</i> ATCC 27126                      | P(y) | J9Y2J7 | YP_006746817.1            | 958  | PAS+LOV+Kinase+RR            | 772 |
|     | <i>Alteromonas</i> <i>macleodii</i> Black Sea 11                    | P(y) | K0CV21 | YP_006823794.1            | 959  | PAS+LOV+Kinase+RR            | 773 |
|     | <i>Alteromonas</i> <i>macleodii</i> DSM 17117 DeePecotype           | P(y) | F2GAX1 | YP_004426010.1            | 959  | PAS+LOV+Kinase+RR            | 774 |
|     | <i>Alteromonas</i> <i>macleodii</i> English Channel 673             | P(y) | K0CM81 | YP_006797832.1            | 958  | LOV+PAS+Kinase+RR            | 775 |
|     | <i>Alteromonas</i> <i>macleodii</i> str. 'Aegean Sea MED64'         | P(y) | S5AQD7 | AGP80766.1                | 959  | PAS+LOV+Kinase+RR            | 776 |
|     | <i>Alteromonas</i> <i>macleodii</i> str. 'English Channel 615'      | P(y) | S5ABK9 | YP_008191735.1            | 959  | PAS+LOV+Kinase+RR            | 777 |
|     | <i>Alteromonas</i> <i>macleodii</i> str. 'Ionian Sea U4'            | P(y) | S5BBY3 | YP_008170856.1            | 959  | PAS+LOV+Kinase+RR            | 778 |
|     |                                                                     |      | S5B6H2 | YP_008170856.1            | 959  | PAS+LOV+Kinase+RR            | 779 |
|     | <i>Alteromonas</i> <i>macleodii</i> str. 'Ionian Sea U8'            | P(y) | S5BMV0 | YP_008174998.1            | 959  | PAS+LOV+Kinase+RR            | 780 |
| 327 | <i>Alteromonas</i> sp. SN2                                          | P(y) | F5Z4R5 | YP_004468204.1            | 956  | PAS+LOV+Kinase+RR            | 781 |
| 328 | <i>Arhodomonas</i> <i>aquaeolei</i>                                 | P(y) |        | WP_018716398.1            | 146  | Short-LOV                    | 782 |
|     |                                                                     |      |        | WP_018717064.1            | 848  | GAF+LOV+PAS+GGDEF+EAL        | 783 |
| 329 | <i>Bermanella</i> <i>marisrubri</i>                                 | P(y) | Q1N482 | WP_007018054.1            | 938  | LOV+ Kinase+ RR+RR           | 784 |
| 330 | <i>Catenovulum</i> <i>agarivorans</i>                               | P(y) |        | WP_016956198.1            | 1106 | PAS+LOV+Kinase+RR            | 785 |
|     |                                                                     |      |        | WP_016956198.1            | 1106 | 2PAS+LOV+Kinase+RR           | 786 |
| 331 | <i>Chromohalobacter</i> <i>salexigens</i> DSM 3043                  | P(y) | Q1QUF0 | YP_574607.1               | 836  | PAS+LOV+PAS+GGDEF+EAL        | 787 |
|     |                                                                     |      | Q1QUF0 | ABE59908.1/YP_574607.1    | 836  | LOV+2PAS+ GGDEF+EAL          | 788 |
|     |                                                                     |      | Q1QU87 | YP_574670.1               | 144  | Short-LOV                    | 789 |
| 332 | <i>Dyella</i> <i>ginsengisoli</i>                                   | P(y) |        | WP_017460863.1            | 820  | RR+PAS+LOV+GGDEF+EAL         | 790 |
|     |                                                                     |      |        | WP_017462527.1            | 823  | LOV+PAS+GGDEF+EAL            | 791 |

|     |                                                  |      |        |                |      |                                  |     |
|-----|--------------------------------------------------|------|--------|----------------|------|----------------------------------|-----|
|     |                                                  |      |        | WP_017463133.1 | 1578 | PAS+GAF+PAS+LOV+GGDEF+Globin+EAL | 792 |
| 333 | <i>Ectothiorhodospira sp.PHS-1</i>               | P(y) | H1G1Q6 | WP_008931310.1 | 159  | Short-LOV                        | 793 |
|     |                                                  |      | H1G08  | WP_008930788.1 | 150  | Short-LOV                        | 794 |
| 334 | <i>Fluoribacter dumoffii</i>                     | P(y) |        | WP_010655036.1 | 357  | LOV+Kinase                       | 795 |
| 335 | <i>Glaciecola nitratreducens JCM 12485</i>       | P(y) | G4QHD6 | YP_004871760.1 | 408  | LOV+SPOIIE                       | 796 |
| 336 | <i>Glaciecola pallidula DSM 14239 = ACAM 615</i> | P(y) | K6ZHY4 | WP_006010726.1 | 408  | LOV+SPOIIE                       | 797 |
| 337 | <i>Hahella ganghwensis</i>                       | P(y) |        | WP_020410026.1 | 1211 | RR+PAS+LOV+GGDEF+EAL+RR          | 798 |
|     |                                                  |      |        | WP_020406443.1 | 1654 | HAMP+PAS+LOV+2PAS+Kinase+RR+Hpt  | 799 |
| 338 | <i>Halomonas anticariensis FP35 = DSM 16096</i>  | P(y) | S2KPA1 | WP_016414477.1 | 1070 | RR+2PAS+LOV+GGDEF+EAL            | 800 |
|     |                                                  |      | S2KJN8 | WP_016418607.1 | 1329 | GAF+PAS+LOV+GGDEF+EAL            | 801 |
|     |                                                  |      | S2KLF6 | WP_016417969.1 | 694  | PAS+LOV+GGDEF+EAL                | 802 |
| 339 | <i>Halomonas boliviensis LC1</i>                 | P(y) | G9EBS6 | WP_007112306.1 | 931  | 3PAS+LOV+GGDEF+EAL               | 803 |
|     |                                                  |      | G9EDB9 | WP_007113307.1 | 139  | Short-LOV                        | 804 |
| 340 | <i>Halomonas jeotgali</i>                        | P(y) |        | WP_017430872.1 | 139  | Short-LOV                        | 805 |
| 341 | <i>Halomonas lutea</i>                           | P(y) |        | WP_019020310.1 | 141  | Short-LOV                        | 806 |
|     |                                                  |      |        | WP_019016980.1 | 856  | GAF+LOV+PAS+GGDEF+EAL            | 807 |
|     |                                                  |      |        | WP_019018880.1 | 857  | GAF+LOV+PAS+GGDEF+EAL            | 808 |
| 342 | <i>Halomonas smyrnensis</i>                      | P(y) |        | WP_016856487.1 | 144  | Short-LOV                        | 809 |
|     |                                                  |      |        | WP_016853871.1 | 1335 | GAF+LOV+2PAS+GGDEF+EAL           | 810 |
|     |                                                  |      |        | WP_016855043.1 | 851  | GAF+LOV+PAS+GGDEF+EAL            | 811 |
| 343 | <i>Halomonas sp. A3H3</i>                        | P(y) |        | WP_022522746.1 | 144  | Short-LOV                        | 812 |
|     |                                                  |      |        | WP_022521218.1 | 684  | PAS+LOV+GGDEF+EAL                | 813 |
| 344 | <i>Halomonas sp. GFAJ-1</i>                      | P(y) | H0J093 | WP_009097290.1 | 874  | LOV+PAS+GGDEF+EAL                | 814 |
|     |                                                  |      | H0J025 | WP_009097057.1 | 145  | Short-LOV                        | 815 |
|     |                                                  |      | H0J1I9 | WP_009098247.1 | 815  | 2PAS+LOV+GGDEF+EAL               | 816 |
| 345 | <i>Halomonas sp. KM-1</i>                        | P(y) |        | WP_010628907.1 | 743  | PAS+LOV+GGDEF+EAL                | 817 |
|     |                                                  |      |        | WP_010627148.1 | 144  | Short-LOV                        | 818 |
|     |                                                  |      |        | WP_010628900.1 | 1328 | GAF+PAS+LOV+GGDEF+EAL            | 819 |
|     |                                                  |      |        | WP_010627231.1 | 1157 | PAS+LOV+GGDEF+EAL                | 820 |
|     |                                                  |      |        | WP_010629458.1 | 830  | PAS+LOV+GGDEF+EAL+RR             | 821 |
| 346 | <i>Halomonas sp.HAL1</i>                         | P(y) | G4FAF4 | WP_008959245.1 | 709  | PAS+LOV+2GGDEF                   | 822 |
|     |                                                  |      | G4F2H5 | WP_008956503.1 | 927  | 3PAS+LOV+ GGDEF+EAL              | 823 |
|     |                                                  |      | G4FBI0 | WP_008959621.1 | 144  | Short-LOV                        | 824 |
| 347 | <i>Halomonas sp.TD01</i>                         | P(y) | F7SNC3 | WP_009723241.1 | 816  | 2PAS+LOV+GGDEF+EAL               | 825 |
|     |                                                  |      | F7SIY3 | WP_009721710.1 | 145  | Short-LOV                        | 826 |
| 348 | <i>Halomonas stevensii</i>                       | P(y) |        | WP_016916582.1 | 145  | Short-LOV                        | 827 |
|     |                                                  |      |        | WP_016915464.1 | 814  | 2PAS+LOV+GGDEF+EAL               | 828 |
|     |                                                  |      |        | WP_016915854.1 | 1161 | PAS+LOV+GGDEF+EAL                | 829 |
| 349 | <i>Halomonas titanicae BH1</i>                   | P(y) | L9UD19 | WP_009286231.1 | 685  | PAS+LOV+GGDEF+EAL                | 830 |
|     |                                                  |      | L9U8I4 | WP_009287681.1 | 171  | Short-LOV                        | 831 |
| 350 | <i>Halomonas zhanjiangensis</i>                  | P(y) |        | WP_018918585.1 | 149  | Short-LOV                        | 832 |
|     |                                                  |      |        | WP_018917662.1 | 1323 | GAF+PAS+LOV+GGDEF+EAL            | 833 |
| 351 | <i>Halothiobacillus neapolitanus ATCC23641</i>   | P(y) | D0L135 | YP_003263455.1 | 151  | Short-LOV                        | 834 |
| 352 | <i>Idiomarinasp.A28L</i>                         | P(y) | F7RZ10 | WP_007420466.1 | 880  | GAF+PAS+LOV+GGDEF+EAL            | 835 |
| 353 | <i>Kangiella aquimarina</i>                      | P(y) |        | WP_018623315.1 | 870  | GAF+PAS+LOV+GGDEF+EAL            | 836 |
| 354 | <i>Kangiella koreensis DSM 16069</i>             | P(y) | C7R7Z7 | YP_003145547.1 | 887  | GAF+PAS+LOV+GGDEF+EAL            | 837 |
| 355 | <i>Kushneria aurantia</i>                        | P(y) |        | WP_019951323.1 | 140  | Short-LOV                        | 838 |
| 356 | <i>Lamprocystis purpurea</i>                     | P(y) |        | WP_020503819.1 | 153  | Short-LOV                        | 839 |
|     |                                                  |      |        | WP_020504715.1 | 152  | Short-LOV                        | 840 |
| 357 | <i>Marichromatium purpuratum 984</i>             | P(y) | F9TYW6 | WP_005222470.1 | 152  | Short-LOV                        | 841 |
|     |                                                  |      | F9TWG1 | WP_005220887.1 | 1118 | 3PAS+LOV+Kinase+RR               | 842 |
| 358 | <i>Marinobacter adhaerens HP15</i>               | P(y) | E4PMK6 | YP_005887842.1 | 552  | LOV+GGDEF+EAL                    | 843 |
| 359 | <i>Marinobacter algicola DG893</i>               | P(y) | A6EZP7 | CCA87536.1     | 858  | GAF+PAS+LOV+GGDEF+EAL            | 844 |

|     |                                                                  |      |        |                |      |                               |     |
|-----|------------------------------------------------------------------|------|--------|----------------|------|-------------------------------|-----|
| 360 | <i>Marinobacter lipolyticus</i> SM19                             | P(y) | R8B0L0 | WP_012138208.1 | 887  | GAF+PAS+LOV+GGDEF+EAL         | 845 |
| 361 | <i>Marinobacter nanhaiticus</i> D15-8W                           | P(y) | N6WWB0 | WP_004580166.1 | 1520 | CHER+PAS+LOV+PAS+GGDEF+EAL    | 846 |
|     |                                                                  |      | N6WWN8 | WP_004580316.1 | 630  | MASE1+LOV+GGDEF               | 847 |
| 362 | <i>Methylobacter marinus</i>                                     | P(y) |        | WP_020158844.1 | 846  | CONTROLLO                     | 848 |
|     |                                                                  |      |        | WP_020157396.1 | 152  | Short-LOV                     | 849 |
| 363 | <i>Methylobacter tundripaludum</i> SV96                          | P(y) | G3J1D6 | WP_006893485.1 | 738  | RR+LOV+LOV+PAS+Kinase         | 850 |
| 364 | <i>Methylococcus capsulatus</i>                                  | P(y) |        | WP_017365821.1 | 640  | LOV+GGDEF+EAL                 | 851 |
|     | <i>Methylococcus capsulatus</i> str. Bath                        | P(y) | Q609J7 | YP_113700.1    | 712  | LOV+GGDEF+EAL                 | 852 |
|     |                                                                  |      | Q607S2 | YP_114126.1    | 853  | PAS+LOV+3PAS+SPOIIE           | 853 |
| 365 | <i>Methylobacterium alcaliphilum</i> DSM 19304                   | P(y) | G4T2M2 | YP_004918336.1 | 164  | Short-LOV                     | 854 |
|     |                                                                  |      | G4T2L9 | YP_004918333.1 | 148  | Short-LOV                     | 855 |
|     |                                                                  |      | G4T0F8 | YP_004918135.1 | 1418 | Kinase+2RR+LOV+4PAS+Kinase+RR | 856 |
| 366 | <i>Methylobacterium buryatense</i>                               | P(y) |        | WP_017840040.1 | 1418 | Hpt+2RR+LOV+4PAS+Kinase       | 857 |
|     |                                                                  |      |        | WP_017842760.1 | 164  | Short-LOV                     | 858 |
|     |                                                                  |      |        | WP_017842762.1 | 148  | Short-LOV                     | 859 |
| 367 | <i>Methylobacterium methanica</i> MC09                           | P(y) | G0A1Q1 | YP_004512611.1 | 150  | Short-LOV                     | 860 |
| 368 | <i>Methylobacterium</i> sp. MK1                                  | P(y) |        | WP_020482233.1 | 151  | Short-LOV                     | 861 |
| 369 | <i>Methylosarcina fibrata</i>                                    | P(y) |        | WP_020564946.1 | 840  | CONTROLLO                     | 862 |
| 370 | <i>Methylovulum miyakonense</i>                                  | P(y) |        | WP_019864760.1 | 153  | Short-LOV                     | 863 |
| 371 | <i>Nitrosococcus halophilus</i> Nc4                              | P(y) | D5BVD1 | YP_003525946.1 | 149  | Short-LOV                     | 864 |
| 372 | <i>Nitrosococcus oceani</i> AFC27                                | P(y) | B6C5R4 | WP_002813571.1 | 150  | Short-LOV                     | 865 |
|     | <i>Nitrosococcus oceani</i> ATCC 19707                           | P(y) | Q3J6W8 | YP_344958.1    | 150  | Short-LOV                     | 866 |
| 373 | <i>Nitrosococcus watsoni</i> C-113                               | P(y) | D8KC92 | YP_003762084.1 | 150  | Short-LOV                     | 867 |
| 374 | <i>Oceanimonas smirnovii</i>                                     | P(y) |        | WP_019936022.1 | 854  | GAF+LOV+PAS+GGDEF+EAL         | 868 |
| 375 | <i>Pseudoalteromonas citrea</i>                                  | P(y) |        | WP_010362109.1 | 1105 | PAS+LOV+Kinase+RR             | 869 |
| 376 | <i>Pseudoalteromonas flavipulchra</i>                            | P(y) |        | WP_010607534.1 | 1103 | PAS+LOV+PAS+Kinase+RR         | 870 |
| 377 | <i>Pseudoalteromonas piscicida</i>                               | P(y) |        | WP_010374796.1 | 1103 | PAS+LOV+PAS+Kinase+RR         | 871 |
| 378 | <i>Pseudoalteromonas rubra</i>                                   | P(y) |        | WP_010380647.1 | 1107 | 2PAS+LOV+Kinase+RR            | 872 |
| 379 | <i>Pseudoalteromonas</i> sp. BSi20495                            | P(y) | G7G480 | WP_008137009.1 | 1098 | PAS+LOV+Kinase+2RR            | 873 |
| 380 | <i>Pseudoalteromonas</i> sp. Bsw20308                            | P(y) | M5H4P7 | WP_007376873.1 | 1098 | PAS+LOV+Kinase+RR             | 874 |
| 381 | <i>Pseudoalteromonas</i> sp. NJ631                               | P(y) |        | WP_017218143.1 | 1103 | PAS+LOV+PAS+Kinase+RR         | 875 |
| 382 | <i>Pseudoalteromonas</i> sp. SM9913                              | P(y) | E6RNZ1 | YP_004068043.1 | 1101 | PAS+LOV+Kinase+2EAL           | 876 |
| 383 | <i>Pseudoalteromonas undina</i>                                  | P(y) |        | WP_010391230.1 | 1101 | PAS+LOV+Kinase+RR             | 877 |
| 384 | <i>Pseudomonas</i>                                               | P(y) |        | WP_010206458.1 | 155  | Short-LOV                     | 878 |
|     |                                                                  |      |        | WP_018927172.1 | 158  | Short-LOV                     | 879 |
| 385 | <i>Pseudomonas aeruginosa</i> B136-33                            | P(y) | M9S7A7 | YP_007711618.1 | 156  | Short-LOV                     | 880 |
| 386 | <i>Pseudomonas agarici</i>                                       | P(y) |        | WP_017130703.1 | 154  | Short-LOV                     | 881 |
| 387 | <i>Pseudomonas alcaligenes</i>                                   | P(y) |        | WP_021217027.1 | 147  | Short-LOV                     | 882 |
|     |                                                                  |      |        | WP_021699549.1 | 146  | Short-LOV                     | 883 |
|     |                                                                  |      |        | WP_021218606.1 | 1234 | PAS+LOV+2PAS+Kinase+RR        | 884 |
| 388 | <i>Pseudomonas alcaliphila</i>                                   | P(y) |        | WP_017678393.1 | 1274 | MASE1+PAS+LOV+GGDEF+EAL       | 885 |
| 389 | <i>Pseudomonas amygdali</i>                                      | P(y) |        | WP_010206443.1 | 452  | LOV+Kinase+RR                 | 886 |
| 390 | <i>Pseudomonas brassicacearum</i> NFM421                         | P(y) | F2KL83 | YP_004356128.1 | 157  | Short-LOV                     | 887 |
| 391 | <i>Pseudomonas chlororaphis</i> O6                               | P(y) | I4XX85 | WP_009047027.1 | 157  | Short-LOV                     | 888 |
| 392 | <i>Pseudomonas chlororaphis</i> subsp. <i>aureofaciens</i> 30-84 | P(y) | J2EWK4 | WP_009042217.1 | 157  | Short-LOV                     | 889 |
| 393 | <i>Pseudomonas extremaustralis</i>                               | P(y) |        | WP_010566244.1 | 155  | Short-LOV                     | 890 |
| 394 | <i>Pseudomonas fluorescens</i>                                   | P(y) |        | WP_017338856.1 | 150  | Short-LOV                     | 891 |
|     |                                                                  |      |        | WP_017336579.1 | 158  | Short-LOV                     | 892 |
|     |                                                                  |      |        | WP_016987018.1 | 158  | Short-LOV                     | 893 |
|     |                                                                  |      |        | WP_019691929.1 | 151  | Short-LOV                     | 894 |
|     |                                                                  |      |        | WP_016976173.1 | 155  | Short-LOV                     | 895 |
|     |                                                                  |      |        | WP_017531111.1 | 155  | Short-LOV                     | 896 |
|     |                                                                  |      |        | WP_017135085.1 | 155  | Short-LOV                     | 897 |

|     |                                                |      |        |                |      |                                      |     |
|-----|------------------------------------------------|------|--------|----------------|------|--------------------------------------|-----|
|     |                                                |      |        | WP_019689251.1 | 733  | RR+2PAS+LOV+GGDEF+EAL                | 898 |
|     | <i>Pseudomonas fluorescens</i> A506            | P(γ) | I2BPA2 | YP_006323676.1 | 525  | LOV+Kinase+RR                        | 899 |
|     |                                                |      | I2BQI5 | YP_006325858.1 | 155  | Short-LOV                            | 900 |
|     | <i>Pseudomonas fluorescens</i> BBc6R8          | P(γ) | K1AY44 | WP_003208484.1 | 155  | Short-LOV                            | 901 |
|     | <i>Pseudomonas fluorescens</i> BRIP34879       | P(γ) | L7H7A8 | WP_003236565.1 | 524  | LOV+Kinase+RR                        | 902 |
|     | <i>Pseudomonas fluorescens</i> F113            | P(γ) | G8QB22 | YP_005210257.1 | 157  | Short-LOV                            | 903 |
|     | <i>Pseudomonas fluorescens</i> PF0-1           | P(γ) | Q3KHW  | YP_346628.1    | 158  | Short-LOV                            | 904 |
|     | <i>Pseudomonas fluorescens</i> PF-5            | P(γ) | Q4KI48 | YP_258085.1    | 152  | Short-LOV                            | 905 |
|     | <i>Pseudomonas fluorescens</i> Q2-87           | P(γ) | J2F5H6 | WP_003178071.1 | 158  | Short-LOV                            | 906 |
|     | <i>Pseudomonas fluorescens</i> Q8r1-96         | P(γ) | I4JY51 | YP_004356128.1 | 157  | Short-LOV                            | 907 |
|     | <i>Pseudomonas fluorescens</i> R124            | P(γ) | K0WFK8 | WP_003224839.1 | 153  | Short-LOV                            | 908 |
|     | <i>Pseudomonas fluorescens</i> R124            | P(γ) | K0WYP8 | WP_003221745.1 | 158  | Short-LOV                            | 909 |
|     | <i>Pseudomonas fluorescens</i> SBW25           | P(γ) | C3K1W0 | YP_002874656.1 | 155  | Short-LOV                            | 910 |
|     | <i>Pseudomonas fluorescens</i> SS101           | P(γ) | I4K663 | WP_003194067.1 | 155  | Short-LOV                            | 911 |
|     | <i>Pseudomonas fluorescens</i> SS101           | P(γ) | I4K738 | WP_003190461.1 | 531  | LOV+Kinase+RR                        | 912 |
|     | <i>Pseudomonas fluorescens</i> WH6             | P(γ) | E2XTK3 | WP_003174467.1 | 519  | LOV+Kinase+RR                        | 913 |
|     |                                                |      | E2XXX1 | WP_003176023.1 | 155  | Short-LOV                            | 914 |
| 395 | <i>Pseudomonas fragi</i>                       | P(γ) |        | WP_010656027.1 | 157  | Short-LOV                            | 915 |
|     |                                                |      |        | WP_016781829.1 | 155  | Short-LOV                            | 916 |
| 396 | <i>Pseudomonas fulva</i> 12-X                  | P(γ) | F6ACW6 | YP_004473266.1 | 534  | LOV+Kinase+RR                        | 917 |
|     |                                                |      | F6AEJ4 | YP_004473421.1 | 150  | Short-LOV                            | 918 |
| 397 | <i>Pseudomonas fuscovaginae</i>                | P(γ) |        | WP_010452910.1 | 519  | LOV+RR                               | 919 |
|     |                                                |      |        | WP_010445203.1 | 154  | Short-LOV                            | 920 |
|     |                                                |      |        | WP_017904260.1 | 154  | Short-LOV                            | 921 |
| 398 | <i>Pseudomonas luteola</i>                     | P(γ) |        | WP_019367061.1 | 1072 | RR+PAS+LOV+PAS+GGDEF+EAL+RR          | 922 |
| 399 | <i>Pseudomonas mandelii</i>                    | P(γ) |        | WP_010460270.1 | 150  | Short-LOV                            | 923 |
|     |                                                |      |        | WP_010463226.1 | 159  | Short-LOV                            | 924 |
|     |                                                |      |        | WP_019581149.1 | 158  | Short-LOV                            | 925 |
| 400 | <i>Pseudomonas mendocina</i>                   | P(γ) |        | WP_017360623.1 | 1274 | MASE1+LOV+2PAS+GGDEF+EAL             | 926 |
|     |                                                |      |        | WP_021487701.1 | 1274 | MASE1+LOV+2PAS+GGDEF+EAL             | 927 |
|     | <i>Pseudomonas mendocina</i> DLHK              | P(γ) | J7UJV0 | WP_004373223.1 | 1254 | MASE1+LOV+2PAS+GGDEF+EAL             | 928 |
|     |                                                |      | J7TJL5 | WP_003245955.1 | 148  | Short-LOV                            | 929 |
|     | <i>Pseudomonas mendocina</i> NK-01             | P(γ) | F4DSG2 | YP_004381369.1 | 148  | Short-LOV                            | 930 |
|     | <i>Pseudomonas mendocina</i> NK-02             | P(γ) | F4DZM3 | YP_004378203.1 | 1274 | MASE1+PAS+LOV+PAS+GGDEF+EAL          | 931 |
|     | <i>Pseudomonas mendocina</i> ymp               | P(γ) | A4XP68 | YP_001185866.1 | 1254 | MASE1+LOV+2PAS+GGDEF+EAL             | 932 |
|     | <i>Pseudomonas mendocina</i> ymp               | P(γ) | A4XXH1 | YP_001188769.1 | 148  | Short-LOV                            | 933 |
| 401 | <i>Pseudomonas monteilii</i>                   | P(γ) |        | WP_016715187.1 | 148  | Short-LOV                            | 934 |
| 402 | <i>Pseudomonas nitroreducens</i>               | P(γ) |        | WP_017519191.1 | 150  | Short-LOV                            | 935 |
| 403 | <i>Pseudomonas plecoglossicida</i> NB2011      | P(γ) | S2JT44 | WP_016395429.1 | 142  | Short-LOV                            | 936 |
| 404 | <i>Pseudomonas poae</i> RE*1-1-14              | P(γ) | M4JYC7 | YP_007397135.1 | 524  | LOV+Kinase+RR                        | 937 |
|     |                                                |      | M4K6Y0 | YP_007398848.1 | 155  | Short-LOV                            | 938 |
| 405 | <i>Pseudomonas protegens</i> CHA0              | P(γ) | R4RAL1 | YP_007998266.1 | 152  | Short-LOV                            | 939 |
| 406 | <i>Pseudomonas pseudoalcaligenes</i> CECT 5344 | P(γ) | I7J111 | WP_003462439.1 | 148  | Short-LOV                            | 940 |
| 407 | <i>Pseudomonas pseudoalcaligenes</i> KF707     | P(γ) | L8MD26 | WP_003449890.1 | 1068 | RR+2PAS+LOV+GGDEF+EAL                | 941 |
|     |                                                |      | L8MMM4 | WP_004422222.1 | 1895 | PAS+GAF+PAS+GAF+PAS+LOV+GGDEF+EAL+RR | 942 |
|     |                                                |      | L8MMQ1 | WP_003456550.1 | 148  | Short-LOV                            | 943 |
| 408 | <i>Pseudomonas psychrophila</i>                | P(γ) |        | WP_019410857.1 | 157  | Short-LOV                            | 944 |
| 409 | <i>Pseudomonas psychrotolerans</i> L19         | P(γ) | H0JJH7 | WP_007162860.1 | 537  | LOV+Kinase+RR                        | 945 |
|     |                                                |      | H0J8E5 | WP_007158985.1 | 538  | LOV+Kinase+RR                        | 946 |
| 410 | <i>Pseudomonas putida</i>                      | P(γ) |        | WP_019097373.1 | 148  | Short-LOV                            | 947 |
|     |                                                |      |        | WP_019752532.1 | 142  | Short-LOV                            | 948 |
|     |                                                |      |        | WP_021782295.1 | 148  | Short-LOV                            | 949 |
|     |                                                |      |        | WP_021784280.1 | 142  | Short-LOV                            | 950 |



|     |                                                                    |      |         |                |      |                          |      |
|-----|--------------------------------------------------------------------|------|---------|----------------|------|--------------------------|------|
|     | <i>Pseudomonas putida</i> ( <i>Arthrobacter siderocapsulatus</i> ) | P(y) | B5SNZ7  |                | 148  | Short-LOV                | 951  |
|     | <i>Pseudomonas putida</i> BIRD-1                                   | P(y) | E4R4W4  | YP_005932103.1 | 142  | Short-LOV                | 952  |
|     | <i>Pseudomonas putida</i> BIRD-2                                   | P(y) | E4RI35  | YP_005930752.1 | 148  | Short-LOV                | 953  |
|     | <i>Pseudomonas putida</i> CSV86                                    | P(y) | L1M649  | WP_009395102.1 | 153  | Short-LOV                | 954  |
|     | <i>Pseudomonas putida</i> CSV86                                    | P(y) | L1M6G2  | WP_009395400.1 | 532  | LOV+Kinase+RR            | 955  |
|     | <i>Pseudomonas putida</i> DOT-T1E                                  | P(y) | I7C6T3  | YP_001269793.1 | 142  | Short-LOV                | 956  |
|     | <i>Pseudomonas putida</i> F1                                       | P(y) | A5W8Z9  | YP_001269793.1 | 142  | Short-LOV                | 957  |
|     |                                                                    |      | A5W4T2  | YP_001268326.1 | 148  | Short-LOV                | 958  |
|     | <i>Pseudomonas putida</i> GB-1                                     | P(y) | B0KGV4  | YP_001670835.1 | 142  | Short-LOV                | 959  |
|     | <i>Pseudomonas putida</i> group                                    | P(y) |         | WP_016713473.1 | 142  | Short-LOV                | 960  |
|     | <i>Pseudomonas putida</i> H8234                                    | P(y) | R9V1Y1  | YP_008094059.1 | 148  | Short-LOV                | 961  |
|     |                                                                    |      |         | YP_008097264.1 | 142  | Short-LOV                | 962  |
|     | <i>Pseudomonas putida</i> HB3267                                   | P(y) | L0FJK3  | YP_007229131.1 | 148  | Short-LOV                | 963  |
|     |                                                                    |      | L0FRT1  | YP_007231313.1 | 142  | Short-LOV                | 964  |
|     | <i>Pseudomonas putida</i> KT2440                                   | P(y) | Q88E39  | NP_746738.1    | 142  | Short-LOV                | 965  |
|     |                                                                    |      | Q88JB0  | NP_744883.1    | 151  | Short-LOV                | 966  |
|     | <i>Pseudomonas putida</i> LS46                                     | P(y) | M7R4B9  | YP_001269793.1 | 142  | Short-LOV                | 967  |
|     |                                                                    |      | M7R1E0  | WP_003254000.1 | 148  | Short-LOV                | 968  |
|     | <i>Pseudomonas putida</i> NBRC 14164                               | P(y) |         | YP_008113666.1 | 148  | Short-LOV                | 969  |
|     |                                                                    |      |         | YP_008111769.1 | 142  | Short-LOV                | 970  |
|     | <i>Pseudomonas putida</i> ND6                                      | P(y) | I3USM9  | YP_001269793.1 | 142  | Short-LOV                | 971  |
|     | <i>Pseudomonas putida</i> S11                                      | P(y) | J8RS26  | WP_003260703.1 | 142  | Short-LOV                | 972  |
|     |                                                                    |      | J8RYG9  | WP_003257626.1 | 148  | Short-LOV                | 973  |
|     | <i>Pseudomonas putida</i> S16                                      | P(y) | F8G2U7  | YP_004701648.1 | 148  | Short-LOV                | 974  |
|     |                                                                    |      | F8G5Y7  | YP_004703866.1 | 142  | Short-LOV                | 975  |
|     | <i>Pseudomonas putida</i> TRO1                                     | P(y) | N9UJ18  | YP_001269793.1 | 142  | Short-LOV                | 976  |
|     |                                                                    |      | N9UCY1  | WP_003254000.1 | 148  | Short-LOV                | 977  |
|     | <i>Pseudomonas putida</i> W619                                     | P(y) | B1JAC4  | YP_001750029.1 | 148  | Short-LOV                | 978  |
|     |                                                                    |      | B1J385  | YP_001747686.1 | 152  | Short-LOV                | 979  |
| 411 | <i>Pseudomonas resinovorans</i> NBRC 106553                        | P(y) | S6ANF2  | YP_008105095.1 | 148  | Short-LOV                | 980  |
| 412 | <i>Pseudomonas savastanoi</i> pv. <i>savastanoi</i> NCPPB 3335     | P(y) | D7HZQ3  | WP_002553497.1 | 534  | LOV+Kinase+RR            | 981  |
| 413 | <i>Pseudomonas</i> sp. 313                                         | P(y) |         | WP_017641826.1 | 501  | LOV+Kinase+RR            | 982  |
|     |                                                                    |      |         | WP_017642205.1 | 538  | LOV+Kinase+RR            | 983  |
| 414 | <i>Pseudomonas</i> sp. 45MFCol3.1                                  | P(y) |         | WP_019647677.1 | 158  | Short-LOV                | 984  |
| 415 | <i>Pseudomonas</i> sp. Ag1                                         | P(y) | J0YEQ9  | WP_008432316.1 | 155  | Short-LOV                | 985  |
| 416 | <i>Pseudomonas</i> sp. CBZ-4                                       | P(y) |         | WP_017735040.1 | 155  | Short-LOV                | 986  |
| 417 | <i>Pseudomonas</i> sp. CF149                                       | P(y) |         | WP_019824960.1 | 155  | Short-LOV                | 987  |
| 418 | <i>Pseudomonas</i> sp. CF150                                       | P(y) | S6KFW9  | WP_020302025.1 | 155  | Short-LOV                | 988  |
|     |                                                                    |      |         | WP_020303213.1 | 510  | LOV+Kinase+RR            | 989  |
| 419 | <i>Pseudomonas</i> sp. CF161                                       | P(y) |         | WP_020297180.1 | 157  | Short-LOV                | 990  |
|     |                                                                    |      | S6J587  | WP_020296253.1 | 300  | LOV+GGDEF                | 991  |
| 420 | <i>Pseudomonas</i> sp. CFII64                                      | P(y) | S6GUX3  | WP_020294427.1 | 153  | Short-LOV                | 992  |
|     |                                                                    |      | S6HC34  | WP_020289714.1 | 759  | GAF+LOV+GGDEF+EAL        | 993  |
| 421 | <i>Pseudomonas</i> sp. CFII68                                      | P(y) | S6JL65  | WP_018604186.1 | 157  | Short-LOV                | 994  |
| 422 | <i>Pseudomonas</i> sp. CFT9                                        | P(y) |         | WP_019821480.1 | 510  | LOV+Kinase+RR            | 995  |
| 423 | <i>Pseudomonas</i> sp. Chol1                                       | P(y) | K5Y919  | WP_008568795.1 | 148  | Short-LOV                | 996  |
| 424 | <i>Pseudomonas</i> sp. EGD-AK9                                     | P(y) |         | WP_021443742.1 | 1251 | MASE1+LOV+3PAS+GGDEF+EAL | 997  |
|     |                                                                    |      |         | WP_021443846.1 | 145  | Short-LOV                | 998  |
| 425 | <i>Pseudomonas</i> sp. G5(2012)                                    | P(y) | S2FLS8  | WP_020796677.1 | 154  | Short-LOV                | 999  |
| 426 | <i>Pseudomonas</i> sp. GM102                                       | P(y) | J2MPF7  | WP_007901653.1 | 158  | Short-LOV                | 1000 |
| 427 | <i>Pseudomonas</i> sp. GM16                                        | P(y) | J2VEZ9  | WP_007914248.1 | 158  | Short-LOV                | 1001 |
| 428 | <i>Pseudomonas</i> sp. GM17                                        | P(y) | J2VFAQ9 | WP_007929819.1 | 157  | Short-LOV                | 1002 |
| 429 | <i>Pseudomonas</i> sp. GM21                                        | P(y) | J2NUZ8  | WP_007944641.1 | 158  | Short-LOV                | 1003 |

|     |                                        |      |        |                |      |                       |      |
|-----|----------------------------------------|------|--------|----------------|------|-----------------------|------|
| 430 | <i>Pseudomonas</i> sp. GM24            | P(γ) | J2QD44 | WP_007914248.1 | 158  | Short-LOV             | 1004 |
| 431 | <i>Pseudomonas</i> sp. GM25            | P(γ) | J2PQ86 | WP_007957219.1 | 158  | Short-LOV             | 1005 |
| 432 | <i>Pseudomonas</i> sp. GM30            | P(γ) | J2Q414 | WP_007968050.1 | 158  | Short-LOV             | 1006 |
| 433 | <i>Pseudomonas</i> sp. GM33            | P(γ) | J3FZ72 | WP_007970313.1 | 158  | Short-LOV             | 1007 |
| 434 | <i>Pseudomonas</i> sp. GM41(2012)      | P(γ) | J2ZFJ0 | WP_008150687.1 | 158  | Short-LOV             | 1008 |
| 435 | <i>Pseudomonas</i> sp. GM48            | P(γ) | J2S6K2 | WP_007986762.1 | 158  | Short-LOV             | 1009 |
| 436 | <i>Pseudomonas</i> sp. GM49            | P(γ) | J3GAS8 | WP_008000603.1 | 158  | Short-LOV             | 1010 |
| 437 | <i>Pseudomonas</i> sp. GM50            | P(γ) | J3GK37 | WP_008008657.1 | 158  | Short-LOV             | 1011 |
| 438 | <i>Pseudomonas</i> sp. GM60            | P(γ) | J2TXN8 | WP_008026981.1 | 158  | Short-LOV             | 1012 |
| 439 | <i>Pseudomonas</i> sp. GM67            | P(γ) | J2UXA4 | WP_008037334.1 | 158  | Short-LOV             | 1013 |
| 440 | <i>Pseudomonas</i> sp. GM74            | P(γ) | J3C1S1 | WP_008046230.1 | 156  | Short-LOV             | 1014 |
| 441 | <i>Pseudomonas</i> sp. GM78            | P(γ) | J2YG82 | WP_008054412.1 | 154  | Short-LOV             | 1015 |
| 442 | <i>Pseudomonas</i> sp. GM79            | P(γ) | J3IFK2 | WP_008070532.1 | 158  | Short-LOV             | 1016 |
| 443 | <i>Pseudomonas</i> sp. GM80            | P(γ) | J3IFB0 | WP_008084980.1 | 158  | Short-LOV             | 1017 |
| 444 | <i>Pseudomonas</i> sp. GM84            | P(γ) | J3E0M0 | WP_008096700.1 | 142  | Short-LOV             | 1018 |
| 445 | <i>Pseudomonas</i> sp. HPB0071         | P(γ) | N2J3H5 | WP_010797478.1 | 558  | LOV+Kinase+RR         | 1019 |
|     |                                        |      | N2J7R2 | WP_010795793.1 | 566  | LOV+Kinase+RR         | 1020 |
|     |                                        |      | N2J7R2 | WP_010795793.1 | 566  | LOV+Kinase+RR         | 1021 |
| 446 | <i>Pseudomonas</i> sp. HYS             | P(γ) |        | WP_010223533.1 | 153  | Short-LOV             | 1022 |
| 447 | <i>Pseudomonas</i> sp. Lz4W            | P(γ) | M5QYU4 | WP_003439967.1 | 157  | Short-LOV             | 1023 |
| 448 | <i>Pseudomonas</i> sp. M47T1           | P(γ) | I4N1D2 | WP_008371185.1 | 152  | Short-LOV             | 1024 |
| 449 | <i>Pseudomonas</i> sp. PAMC 25886      | P(γ) |        | WP_010176982.1 | 155  | Short-LOV             | 1025 |
| 450 | <i>Pseudomonas</i> sp. PAMC 26793      | P(γ) |        | WP_017479546.1 | 145  | Short-LOV             | 1026 |
| 451 | <i>Pseudomonas</i> sp. PAMC 26793      | P(γ) |        | WP_017476025.1 | 155  | Short-LOV             | 1027 |
| 452 | <i>Pseudomonas</i> sp. S9              | P(γ) |        | WP_010486409.1 | 152  | Short-LOV             | 1028 |
| 453 | <i>Pseudomonas</i> sp. UW4             | P(γ) | K9NJA7 | YP_007029976.1 | 148  | Short-LOV             | 1029 |
|     |                                        |      | K9NEI7 | YP_007027827.1 | 156  | Short-LOV             | 1030 |
| 454 | <i>Pseudomonas</i> sp. TJI-51          | P(γ) | F0EAJ0 | WP_009685517.1 | 382  | LOV+Kinase            | 1031 |
|     |                                        |      | F0E265 | WP_009682668.1 | 142  | Short-LOV             | 1032 |
|     |                                        |      | F0EAK5 | WP_009685532.1 | 148  | Short-LOV             | 1033 |
| 455 | <i>Pseudomonas stutzeri</i>            | P(γ) |        | WP_019339020.1 | 148  | Short-LOV             | 1034 |
|     |                                        |      |        | WP_021206844.1 | 148  | Short-LOV             | 1035 |
|     | <i>Pseudomonas stutzeri</i> A1501      | P(γ) | A4VKZ3 | YP_001172486.1 | 146  | Short-LOV             | 1036 |
|     | <i>Pseudomonas stutzeri</i> CCUG 29243 | P(γ) | I4CTM3 | YP_006457853.1 | 146  | Short-LOV             | 1037 |
|     | <i>Pseudomonas stutzeri</i> DSM 4166   | P(γ) | F2MYU4 | YP_005938635.1 | 146  | Short-LOV             | 1038 |
|     | <i>Pseudomonas stutzeri</i> DSM 5190   | P(γ) | F8H9C5 | YP_004714236.1 | 148  | Short-LOV             | 1039 |
|     | <i>Pseudomonas stutzeri</i> KOS6       | P(γ) | K6CEY0 | WP_003296418.1 | 1064 | RR+2PAS+LOV+GGDEF+EAL | 1040 |
|     | <i>Pseudomonas stutzeri</i> NF13       | P(γ) | M2UPJ8 | WP_003300039.1 | 146  | Short-LOV             | 1041 |
|     | <i>Pseudomonas stutzeri</i> RCH2       | P(γ) | L0GJI2 | YP_007240543.1 | 148  | Short-LOV             | 1042 |
|     | <i>Pseudomonas stutzeri</i> TS44       | P(γ) | I4JMH9 | WP_003287724.1 | 148  | Short-LOV             | 1043 |
| 456 | <i>Pseudomonas synxantha</i> BG33R     | P(γ) | I4L697 | WP_005791275.1 | 155  | Short-LOV             | 1044 |
| 457 | <i>Pseudomonas syringae</i>            | P(γ) |        | WP_010432789.1 | 534  | LOV+RR                | 1045 |
|     |                                        |      |        | WP_010404642.1 | 259  | LOV+Kinase            | 1046 |
|     |                                        |      |        | WP_017279143.1 | 502  | LOV+Kinase+RR         | 1047 |
|     |                                        |      |        | WP_017702380.1 | 502  | LOV+Kinase+RR         | 1048 |
|     |                                        |      |        | WP_017709231.1 | 502  | LOV+Kinase+RR         | 1049 |
|     |                                        |      |        | WP_019334300.1 | 502  | LOV+Kinase+RR         | 1050 |
|     |                                        |      |        | WP_020322550.1 | 534  | LOV+Kinase+RR         | 1051 |
|     |                                        |      |        | WP_020304842.1 | 534  | LOV+Kinase+RR         | 1052 |
|     |                                        |      |        | WP_020340339.1 | 500  | LOV+Kinase+RR         | 1053 |
|     |                                        |      |        | WP_020354720.1 | 534  | LOV+Kinase+RR         | 1054 |
|     |                                        |      |        | WP_017703627.1 | 502  | LOV+Kinase+RR         | 1055 |
|     |                                        |      |        | WP_017683368.1 | 534  | LOV+Kinase+RR         | 1056 |

|     |                                                                    |      |        |                           |      |                               |      |
|-----|--------------------------------------------------------------------|------|--------|---------------------------|------|-------------------------------|------|
|     | <i>Pseudomonas syringae</i> BRIP34876                              | P(γ) | L7FTW7 | WP_003426528.1            | 534  | LOV+Kinase+RR                 | 1057 |
|     |                                                                    |      | L7FQF5 | WP_003429130.1            | 647  | LOV+PAS+Kinase+RR             | 1058 |
|     | <i>Pseudomonas syringae</i> BRIP34881                              | P(γ) | L7G1B0 | WP_003426528.1            | 534  | LOV+Kinase+RR                 | 1059 |
|     |                                                                    |      | L7GCE7 | WP_003429130.1            | 647  | LOV+PAS+Kinase+RR             | 1060 |
|     | <i>Pseudomonas syringae</i> BRIP39023                              | P(γ) | L7GTP5 | WP_003435337.1            | 502  | LOV+Kinase+RR                 | 1061 |
|     | <i>Pseudomonas syringae</i> Cit 7                                  | P(γ) | F3H4Y3 | WP_003370902.1            | 266  | LOV+Kinase                    | 1062 |
| 458 | <i>Pseudomonas syringae</i> pv. <i>aceris</i> str. M302273PT       | P(γ) | F3JEE1 | WP_003401108.1            | 502  | LOV+Kinase+RR                 | 1063 |
| 459 | <i>Pseudomonas syringae</i> pv. <i>actinidiae</i> ICMP 19068       | P(γ) | S6P6T0 | WP_003379535.1            | 534  | LOV+Kinase+RR                 | 1064 |
|     | <i>Pseudomonas syringae</i> pv. <i>actinidiae</i> ICMP 19070       | P(γ) | S6R1K7 | WP_003379535.1            | 534  | LOV+Kinase+RR                 | 1065 |
|     | <i>Pseudomonas syringae</i> pv. <i>actinidiae</i> ICMP 19071       | P(γ) | S6MK99 | WP_003379535.1            | 534  | LOV+Kinase+RR                 | 1066 |
|     | <i>Pseudomonas syringae</i> pv. <i>actinidiae</i> ICMP 19072       | P(γ) | S6N632 | WP_003379535.1            | 534  | LOV+Kinase+RR                 | 1067 |
|     | <i>Pseudomonas syringae</i> pv. <i>actinidiae</i> ICMP 19103       | P(γ) | S6MYJ2 | WP_003379535.1            | 534  | LOV+Kinase+RR                 | 1068 |
|     | <i>Pseudomonas syringae</i> pv. <i>actinidiae</i> ICMP 19104       | P(γ) | S6PWW6 | WP_003379535.1            | 534  | LOV+Kinase+RR                 | 1069 |
|     | <i>Pseudomonas syringae</i> pv. <i>actinidiae</i> ICMP 9855        | P(γ) | S6SDG5 | WP_003379535.1            | 534  | LOV+Kinase+RR                 | 1070 |
|     | <i>Pseudomonas syringae</i> pv. <i>Actinidiae</i> str. M302091     | P(γ) | F3I1F9 | WP_003379535.1            | 534  | LOV+Kinase+RR                 | 1071 |
| 460 | <i>Pseudomonas syringae</i> pv. <i>aesculi</i> str. 0893_23        | P(γ) | F3DLV  | WP_005730386.1            | 446  | LOV+Kinase+RR                 | 1072 |
| 461 | <i>Pseudomonas syringae</i> pv. <i>avellanae</i> str. ISPaVe013    | P(γ) | K2TLM0 | WP_003410607.1            | 502  | LOV+Kinase+RR                 | 1073 |
|     |                                                                    |      | K2TFJ1 | WP_003416783.1            | 534  | LOV+Kinase+RR                 | 1074 |
| 462 | <i>Pseudomonas syringae</i> pv. <i>glycinea</i> str. B076          | P(γ) | E7P672 | WP_004662206.1            | 534  | LOV+Kinase+RR                 | 1075 |
|     | <i>Pseudomonas syringae</i> pv. <i>glycinea</i> str. race 4        | P(γ) | E7PNY8 | WP_004662206.1            | 534  | LOV+Kinase+RR                 | 1076 |
| 463 | <i>Pseudomonas syringae</i> pv. <i>japonica</i> str. M301072PT     | P(γ) | F3FF68 | WP_003314892.1            | 534  | LOV+Kinase                    | 1077 |
| 464 | <i>Pseudomonas syringae</i> pv. <i>maculicola</i> str. ES4326      | P(γ) | F3HHL5 | WP_007249531.1            | 534  | LOV+Kinase+RR                 | 1078 |
|     |                                                                    |      | F3HHL5 | WP_007249531.1            | 534  | LOV+Kinase+RR                 | 1079 |
| 465 | <i>Pseudomonas syringae</i> pv. <i>mori</i> str. 301020            | P(γ) | F3F0F6 | WP_005757687.1            | 254  | LOV+Kinase                    | 1080 |
| 466 | <i>Pseudomonas syringae</i> pv. <i>morsprunorum</i> str. M302280PT | P(γ) | F3DZS  | WP_005739418.1            | 534  | LOV+Kinase                    | 1081 |
| 467 | <i>Pseudomonas syringae</i> pv. <i>oryzae</i> str. 1_6             | P(γ) | F2ZCS  | WP_005886808.1            | 534  | LOV+Kinase+RR                 | 1082 |
| 468 | <i>Pseudomonas syringae</i> pv. <i>phaseolicola</i> 1448A          | P(γ) | Q48IV1 | YP_274680.1               | 507  | LOV+Kinase+RR                 | 1083 |
| 469 | <i>Pseudomonas syringae</i> pv. <i>pisi</i> str. 1704B             | P(γ) | F3GB29 | WP_003344947.1            | 534  | LOV+Kinase                    | 1084 |
| 470 | <i>Pseudomonas syringae</i> pv. <i>syringae</i> B64                | P(γ) | L8NFB2 | WP_003426528.1            | 534  | LOV+Kinase+RR                 | 1085 |
|     | <i>Pseudomonas syringae</i> pv. <i>syringae</i> B728a              | P(γ) | Q4ZSY3 | YP_235777.1               | 534  | LOV+Kinase+RR                 | 1086 |
| 471 | <i>Pseudomonas syringae</i> pv. <i>tabaci</i> ATCC 11528           | P(γ) | F3JTS8 | WP_005777149.1            | 534  | LOV+Kinase+RR                 | 1087 |
| 472 | <i>Pseudomonas syringae</i> pv. <i>theae</i> ICMP 3923             | P(γ) | S6P4Z2 | WP_003379535.1            | 534  | LOV+Kinase+RR                 | 1088 |
| 473 | <i>Pseudomonas syringae</i> pv. <i>tomato</i> DC3000               | P(γ) | Q881J7 | NP_792694.1               | 534  | LOV+Kinase+RR                 | 1089 |
|     | <i>Pseudomonas syringae</i> pv. <i>tomato</i> T1                   | P(γ) | E2M7Z9 | EEB61765.1/NP_792694.1    | 534  | LOV+Kinase                    | 1090 |
| 474 | <i>Pseudomonas tolaasii</i>                                        | P(γ) |        | WP_017254000.1            | 155  | Short-LOV                     | 1091 |
|     |                                                                    |      |        | WP_016971065.1            | 155  | Short-LOV                     | 1092 |
| 475 | <i>Pseudomonas veronii</i>                                         | P(γ) |        | WP_017847767.1            | 155  | Short-LOV                     | 1093 |
| 476 | <i>Pseudomonas viridiflava</i> UASWS0038                           | P(γ) | K6BMA6 | WP_004885117.1            | 151  | Short-LOV                     | 1094 |
|     |                                                                    |      | K6BTG2 | WP_004882331.1            | 503  | LOV+Kinase+RR                 | 1095 |
| 477 | <i>Rheinheimera</i> sp. A13L                                       | P(γ) | F7P0A2 | WP_008900325.1            | 1195 | RR+GAF+PAS+LOV+GGDEF+EAL      | 1096 |
| 478 | <i>Rhodanobacter fulvus</i> Jip2                                   | P(γ) | I4VRA7 | WP_007081336.1            | 813  | RR+PAS+LOV+GGDEF+EAL          | 1097 |
| 479 | <i>Rhodobacter sphaeroides</i> WS8N                                | P(γ) | F5M2M2 | WP_002719387.1            | 176  | Short-LOV                     | 1098 |
| 480 | <i>Salinisphaera shabanensis</i> E1L3A                             | P(γ) | F7QDZ2 | WP_006915464.1            | 333  | LOV+GGDEF                     | 1099 |
| 481 | <i>Serratia fonticola</i>                                          | P(γ) |        | WP_021805398.1            | 310  | LOV+GGDEF                     | 1100 |
| 482 | <i>Serratia plymuthica</i> AS9                                     | P(γ) | G0B7B1 | YP_004500367.1            | 310  | LOV+GGDEF                     | 1101 |
| 483 | <i>Serratia</i> sp. AS12                                           | P(γ) | G0BP57 | /YP_004500367.1           | 310  | LOV+GGDEF                     | 1102 |
| 484 | <i>Serratia</i> sp. AS13                                           | P(γ) | G0C2A2 | /YP_004500367.1           | 310  | LOV+GGDEF                     | 1103 |
| 485 | <i>Shewanella baltica</i> BA175                                    | P(γ) | G0AVH5 | YP_006022696.1            | 1215 | MASE+CHASE+PAS+LOV+GGDEF+EAL  | 1104 |
|     | <i>Shewanella baltica</i> OS 117                                   | P(γ) | G0DM57 | YP_006035465.1            | 1215 | MASE+CHASE+PAS+LOV+GGDEF+EAL  | 1105 |
|     | <i>Shewanella baltica</i> OS 183                                   | P(γ) | H1YLV6 | EHQ13065.1/YP_006022696.1 | 1215 | MASE+CHASE+PAS+LOV+GGDEF+EAL  | 1106 |
|     | <i>Shewanella baltica</i> OS185                                    | P(γ) | A6WU43 | YP_001368395.1            | 1215 | MASE1+CHASE+PAS+LOV+GGDEF+EAL | 1107 |
|     | <i>Shewanella baltica</i> OS223                                    | P(γ) | B8ECQ3 | YP_002360038.1            | 1215 | MASE1+CHASE+PAS+LOV+GGDEF+EAL | 1108 |
| 486 | <i>Shewanella oneidensis</i> MR-1                                  | P(γ) | K4PU33 | YP_007001418.1            | 1181 | MASE1+CHASE+PAS+LOV+GGDEF+EAL | 1109 |

|     |                                                     |      |        |                |      |                                 |      |
|-----|-----------------------------------------------------|------|--------|----------------|------|---------------------------------|------|
| 487 | <i>Shewanella putrefaciens</i> CN-32                | P(γ) | A4YC79 | YP_001185361.1 | 1216 | MASE1+CHASE+PAS+LOV+GGDEF+EAL   | 1110 |
| 488 | <i>Shewanella</i> sp. ANA-3                         | P(γ) | A0L2H7 | YP_871652.1    | 1228 | MASE1+CHASE+PAS+LOV+GGDEF+EAL   | 1111 |
| 489 | <i>Shewanella</i> sp. HN_41                         | P(γ) | F7RU72 | WP_007652082.1 | 1209 | MASE+CHASE+PAS+LOV+GGDEF+EAL    | 1112 |
| 490 | <i>Shewanella</i> sp. W3-18-1                       | P(γ) | A1RE55 | YP_961504.1    | 1216 | MASE1+CHASE+PAS+LOV+GGDEF+EAL   | 1113 |
| 491 | <i>Sphingomonas elodea</i>                          | P(γ) |        | WP_010545260.1 | 186  | Short-LOV                       | 1114 |
| 492 | <i>Spiribacter salinus</i> M19-40                   | P(γ) | R4VQP9 | YP_008047228.1 | 151  | Short-LOV                       | 1115 |
| 493 | <i>Thalassolituus oleivorans</i> MIL-1              | P(γ) | M5DNS9 | YP_007681337.1 | 155  | Short-LOV                       | 1116 |
| 494 | <i>Thioalkalimicrobium aerophilum</i> AL3           | P(γ) | G4D8R7 | WP_006459544.1 | 147  | Short-LOV                       | 1117 |
| 495 | <i>Thioalkalimicrobium cyclicum</i> DSM 14477       | P(γ) | F6D9J9 | YP_004536435.1 | 148  | Short-LOV                       | 1118 |
| 496 | <i>Thioalkalivibrio</i>                             | P(γ) |        | WP_019024324.1 | 147  | Short-LOV                       | 1119 |
|     |                                                     |      |        | WP_018864256.1 | 147  | Short-LOV                       | 1120 |
|     |                                                     |      |        | WP_018139391.1 | 147  | Short-LOV                       | 1121 |
|     |                                                     |      |        | WP_018174373.1 | 147  | Short-LOV                       | 1122 |
|     |                                                     |      |        | WP_018861429.1 | 147  | Short-LOV                       | 1123 |
|     |                                                     |      |        | WP_018650214.1 | 143  | Short-LOV                       | 1124 |
|     |                                                     |      |        | WP_018169641.1 | 143  | Short-LOV                       | 1125 |
|     |                                                     |      |        | WP_018867397.1 | 130  | Short-LOV                       | 1126 |
|     |                                                     |      |        | WP_018877756.1 | 130  | Short-LOV                       | 1127 |
|     |                                                     |      |        | WP_017942490.1 | 143  | Short-LOV                       | 1128 |
|     |                                                     |      |        | WP_018140537.1 | 143  | Short-LOV                       | 1129 |
|     |                                                     |      |        | WP_019589553.1 | 143  | Short-LOV                       | 1130 |
|     |                                                     |      |        | WP_018870567.1 | 143  | Short-LOV                       | 1131 |
| 497 | <i>Thioalkalivibrio nitratireducens</i> DSM 14787   | P(γ) | L0DYC1 | YP_007218080.1 | 150  | Short-LOV                       | 1132 |
| 498 | <i>Thioalkalivibrio</i> sp. AKL11                   | P(γ) |        | WP_018939800.1 | 147  | Short-LOV                       | 1133 |
| 499 | <i>Thioalkalivibrio</i> sp. AKL12                   | P(γ) |        | WP_018951723.1 | 143  | Short-LOV                       | 1134 |
| 500 | <i>Thioalkalivibrio</i> sp. AKL17                   | P(γ) |        | WP_018947690.1 | 143  | Short-LOV                       | 1135 |
| 501 | <i>Thioalkalivibrio</i> sp. AKL6                    | P(γ) |        | WP_018145821.1 | 143  | Short-LOV                       | 1136 |
| 502 | <i>Thioalkalivibrio</i> sp. ALE23                   | P(γ) |        | WP_019022854.1 | 609  | MASE1+LOV+GGDEF                 | 1137 |
| 503 | <i>Thioalkalivibrio</i> sp. ALE31                   | P(γ) |        | WP_018875372.1 | 130  | Short-LOV                       | 1138 |
| 504 | <i>Thioalkalivibrio</i> sp. ALJ15                   | P(γ) |        | WP_020146677.1 | 147  | Short-LOV                       | 1139 |
| 505 | <i>Thioalkalivibrio</i> sp. ALJ16                   | P(γ) |        | WP_018872447.1 | 143  | Short-LOV                       | 1140 |
| 506 | <i>Thioalkalivibrio</i> sp. ALJ17                   | P(γ) |        | WP_018953828.1 | 1218 | RR+PAS+GAF+LOV+2PAS+Kinase+RR   | 1141 |
| 507 | <i>Thioalkalivibrio</i> sp. ALJ24                   | P(γ) |        | WP_018936177.1 | 147  | Short-LOV                       | 1142 |
|     |                                                     |      |        | WP_018936260.1 | 625  | MASE1+LOV+GGDEF                 | 1143 |
| 508 | <i>Thioalkalivibrio</i> sp. ALJT                    | P(γ) |        | WP_019626073.1 | 143  | Short-LOV                       | 1144 |
| 509 | <i>Thioalkalivibrio</i> sp. ALMg11                  | P(γ) |        | WP_018949625.1 | 143  | Short-LOV                       | 1145 |
| 510 | <i>Thioalkalivibrio</i> sp. ALSr1                   | P(γ) |        | WP_019643012.1 | 143  | Short-LOV                       | 1146 |
|     |                                                     |      |        | WP_019643090.1 | 639  | MASE1+LOV+GGDEF                 | 1147 |
| 511 | <i>Thioalkalivibrio</i> sp. HL-Eb18                 | P(γ) |        | WP_017926630.1 | 147  | Short-LOV                       | 1148 |
| 512 | <i>Thioalkalivibrio</i> sp. HL-EbGR7                | P(γ) | B8GRG0 | YP_002513501.1 | 148  | Short-LOV                       | 1149 |
| 513 | <i>Thioalkalivibrio</i> sp. K90mix                  | P(γ) | D3S9U5 | YP_003460536.1 | 147  | Short-LOV                       | 1150 |
| 514 | <i>Thioalkalivibrio thiocyanoxidans</i> ARh4        | P(γ) | G4DMF8 | WP_006749018.1 | 150  | Short-LOV                       | 1151 |
| 515 | <i>Thiocapsa marina</i> 5811                        | P(γ) | F9U8V  | WP_007192233.1 | 153  | Short-LOV                       | 1152 |
| 516 | <i>Thiocystis violascens</i> ATCC 17096             | P(γ) | I3Y8C2 | YP_006413365.1 | 515  | LOV+PAS+Kinase                  | 1153 |
| 517 | <i>Thioflavococcus mobilis</i> 8321                 | P(γ) | L0GV52 | YP_007243337.1 | 155  | Short-LOV                       | 1154 |
| 518 | <i>Thiomicrospira denitrificans</i> ATCC 33889      | P(γ) | Q30NS0 | YP_394596.1    | 240  | HTH+ LOV                        | 1155 |
| 519 | <i>Thiomicrospira halophila</i>                     | P(γ) |        | WP_019895319.1 | 151  | Short-LOV                       | 1156 |
| 520 | <i>Thiorhodospira sibirica</i> ATCC 700588          | P(γ) | G4E1Z1 | WP_006786321.1 | 1042 | LOV+4PAS+Kinase+RR              | 1157 |
| 521 | <i>Thiorhodovibrio</i> sp. 970                      | P(γ) | H8Z429 | WP_009150501.1 | 155  | Short-LOV                       | 1158 |
| 522 | <i>Thiothrix nivea</i> DSM 5205                     | P(γ) | I3BYI4 | WP_002710300.1 | 158  | Short-LOV                       | 1159 |
| 523 | <i>Vibrio alginolyticus</i> NBRC 15630 = ATCC 17749 | P(γ) |        | YP_008535342.1 | 1595 | HAMP+PAS+LOV+2PAS+Kinase+RR+Hpt | 1160 |
| 524 | <i>Vibrio fischeri</i> ATCC 700601                  | P(γ) | Q5E662 | YP_204372.1    | 631  | LOV+GGDEF                       | 1161 |
|     | <i>Vibrio fischeri</i> MJ11                         | P(γ) | B5FD75 | YP_002155793.1 | 631  | LOV+GGDEF                       | 1162 |

|     |                                                                        |      |        |                               |      |                                  |      |
|-----|------------------------------------------------------------------------|------|--------|-------------------------------|------|----------------------------------|------|
|     | <i>Vibrio fischeri</i> SR5                                             | P(y) | H1QYA1 | WP_005418693.1                | 631  | LOV+GGDEF                        | 1163 |
| 525 | <i>Vibrio parahaemolyticus</i> 16                                      | P(y) | B8KBV9 | WP_005474670.1                | 1594 | HAMP+PAS+LOV+2PAS+Kinase+RR+Hpt  | 1164 |
| 526 | <i>Vibrio proteolyticus</i>                                            | P(y) |        | WP_021706469.1                | 1600 | HAMP+PAS+LOV+2PAS+Kinase+RR+Hpt  | 1165 |
| 527 | <i>Xanthomonas albilineans</i> GPE PC73                                | P(y) | D2UAU2 | YP_003376125.1                | 544  | LOV+Kinase+RR                    | 1166 |
| 528 | <i>Xanthomonas arboricola</i>                                          | P(y) |        | WP_016902009.1                | 520  | LOV+Kinase+RR                    | 1167 |
| 529 | <i>Xanthomonas axonopodis</i>                                          | P(y) |        | WP_016851550.1                | 540  | LOV+Kinase+RR                    | 1168 |
|     |                                                                        |      |        | WP_017173235.1                | 356  | LOV+Kinase                       | 1169 |
|     |                                                                        |      |        | WP_017161173.1                | 334  | LOV+Kinase                       | 1170 |
|     |                                                                        |      |        | WP_017159283.1                | 540  | LOV+Kinase+RR                    | 1171 |
|     |                                                                        |      |        | WP_017157089.1                | 540  | LOV+Kinase+RR                    | 1172 |
| 530 | <i>Xanthomonas axonopodis</i> pv. <i>citri</i> str.306                 | P(y) | Q8PJH  | NP_642870.1                   | 540  | LOV+Kinase+RR                    | 1173 |
| 531 | <i>Xanthomonas axonopodis</i> pv. <i>citrumelo</i> F1                  | P(y) | G2LWN4 | YP_004852094.1                | 540  | LOV+Kinase+RR                    | 1174 |
| 532 | <i>Xanthomonas axonopodis</i> pv. <i>malvacearum</i> str. GSPB1386     | P(y) | K8GB13 | WP_005914055.1                | 540  | LOV+Kinase+RR                    | 1175 |
|     | <i>Xanthomonas axonopodis</i> pv. <i>malvacearum</i> str. GSPB2388     | P(y) | K8G4G5 | WP_005914055.1                | 540  | LOV+Kinase+RR                    | 1176 |
| 533 | <i>Xanthomonas axonopodis</i> pv. <i>punicae</i> str. LMG 859          | P(y) | H1XH4  | WP_005929141.1                | 540  | LOV+Kinase+RR                    | 1177 |
| 534 | <i>Xanthomonas campestris</i>                                          | P(y) |        | WP_010378213.1                | 541  | LOV+Kinase+RR                    | 1178 |
| 535 | <i>Xanthomonas campestris</i> pv <i>campestris</i> 8004                | P(y) | Q4UW16 | YP_242777.1/NP_637775.1       | 540  | LOV+Kinase+RR                    | 1179 |
|     | <i>Xanthomonas campestris</i> pv <i>campestris</i> ATCC 33913          | P(y) | Q8P827 | NP_637775.1                   | 540  | LOV+Kinase+RR                    | 1180 |
|     | <i>Xanthomonas campestris</i> pv. <i>campestris</i> B100               | P(y) | B0RRL1 | YP_001903150.1                | 540  | LOV+Kinase+RR                    | 1181 |
| 536 | <i>Xanthomonas campestris</i> pv. <i>raphani</i> 756C                  | P(y) | G0CI52 | YP_005637715.1                | 540  | LOV+Kinase+RR                    | 1182 |
| 537 | <i>Xanthomonas campestris</i> pv. <i>vesicatoria</i> 85-10             | P(y) | Q3BRX8 | YP_364485.1                   | 540  | LOV+Kinase+RR                    | 1183 |
| 538 | <i>Xanthomonas citri</i> pv. <i>mangiferae</i> indicae LMG 941         | P(y) | H8FDX1 | WP_003484907.1                | 502  | LOV+Kinase+RR                    | 1184 |
| 539 | <i>Xanthomonas citri</i> subsp. <i>citri</i> Aw12879                   | P(y) | M4VYP7 | YP_007650222.1                | 540  | LOV+Kinase+RR                    | 1185 |
| 540 | <i>Xanthomonas fuscans</i> subsp. <i>aurantifolii</i> str. ICPB 10535  | P(y) | D4TB06 | WP_007965960.1                | 540  | LOV+Kinase+RR                    | 1186 |
|     | <i>Xanthomonas fuscans</i> subsp. <i>aurantifolii</i> str. ICPB 11122  | P(y) | D4SVY4 | WP_007965960.1                | 540  | LOV+Kinase+RR                    | 1187 |
| 541 | <i>Xanthomonas gardneri</i> ATCC 19865                                 | P(y) | F0C005 | WP_006448485.1                | 180  | Short-LOV                        | 1188 |
| 542 | <i>Xanthomonas oryzae</i>                                              | P(y) |        | WP_019299959.1                | 507  | LOV+Kinase+RR                    | 1189 |
| 543 | <i>Xanthomonas oryzae</i> pv. <i>oryzae</i> MAFF 311018                | P(y) | Q2P13  | YP_452017.1                   | 540  | LOV+Kinase+RR                    | 1190 |
|     | <i>Xanthomonas oryzae</i> pv. <i>oryzae</i> (strain KACC10331 / KXO85) | P(y) | Q5GY20 | YP_201786.1                   | 428  | LOV+Kinase                       | 1191 |
|     | <i>Xanthomonas oryzae</i> pv. <i>oryzae</i> PXO99A                     | P(y) | B2SUI2 | YP_001914487.1                | 507  | LOV+Kinase+RR                    | 1192 |
| 544 | <i>Xanthomonas oryzae</i> pv. <i>oryzicola</i> BLS256                  | P(y) | G7TAT9 | YP_005628219.1                | 502  | LOV+Kinase+RR                    | 1193 |
| 545 | <i>Xanthomonas perforans</i> 91-118                                    | P(y) | F0BMJ4 | WP_008571382.1                | 540  | LOV+Kinase+RR                    | 1194 |
| 546 | <i>Xanthomonas sacchari</i>                                            | P(y) |        | WP_010342969.1                | 544  | LOV+Kinase+RR                    | 1195 |
| 547 | <i>Xanthomonas</i> sp. SHU199                                          | P(y) |        | WP_017907883.1                | 544  | LOV+Kinase+RR                    | 1196 |
| 548 | <i>Xanthomonas</i> sp. SHU308                                          | P(y) |        | WP_017914963.1                | 544  | LOV+Kinase+RR                    | 1197 |
| 549 | <i>Xanthomonas translucens</i> DAR61454                                | P(y) | L7FSH1 | WP_003473017.1                | 542  | LOV+Kinase+RR                    | 1198 |
| 550 | <i>Xanthomonas translucens</i> pv. <i>graminis</i> ART-Xtg29           | P(y) | K8ZG10 | WP_009602159.1                | 542  | LOV+Kinase+RR                    | 1199 |
| 551 | <i>Xanthomonas translucens</i> pv. <i>translucens</i> DSM 18974        | P(y) | L0SUV4 | WP_003474558.1                | 542  | LOV+Kinase+RR                    | 1200 |
| 552 | <i>Xanthomonas vasicola</i>                                            | P(y) |        | WP_010363479.1                | 541  | LOV+Kinase+RR                    | 1201 |
|     |                                                                        |      |        | WP_017116448.1                | 508  | LOV+Kinase+RR                    | 1202 |
| 553 | <i>Xanthomonas vesicatoria</i> ATCC 35937                              | P(y) | F0BB91 | WP_005990538.1                | 519  | LOV+Kinase+RR                    | 1203 |
| 554 | <i>Chloroflexus aggregans</i> DSM 9485                                 | Chl  | B8GAY9 | YP_002465025.1                | 913  | LOV+PAS+PAS+Kinase+RR            | 1204 |
| 555 | <i>Chloroflexus aurantiacus</i> ATCC 29364                             | Chl  | B9LBT8 | YP_002571059.1/YP_001636696.1 | 915  | LOV +2PAS +Kinase+RR+Hpt         | 1205 |
|     | <i>Chloroflexus aurantiacus</i> J-10-fl                                | Chl  | A9WHI1 | YP_001636696.1                | 915  | LOV +2PAS+Kinase+RR+Hpt          | 1206 |
| 556 | <i>Chloroherpeton thalassium</i> ATCC35110                             | Chl  | B3QS59 | YP_001996451.1                | 1333 | 3PAS+LOV+GAF+PAS+Kinase+RR       | 1207 |
| 557 | <i>Herpetosiphon aurantiacus</i> ATCC 23779                            | Chl  | A9B1I0 | YP_001543993.1                | 1877 | HAMP+GAF+LOV+4PAS+GAF+Kinase     | 1208 |
| 558 | <i>Acaryochloris marina</i> MBIC 11017                                 | Cya  | B0C6M6 | YP_001515761.1                | 935  | PAS+LOV+2PAS+GGDEF+EAL           | 1209 |
| 559 | <i>Acaryochloris</i> sp. CCMEE 5410                                    | Cya  |        | WP_010476320.1                | 912  | 2PAS+LOV+PAS+GGDEF+EAL           | 1210 |
| 560 | <i>Anabaena variabilis</i> ATCC 29413                                  | Cya  | Q3M6B3 | YP_324368.1                   | 1021 | LOV+2PAS+GGDEF+EAL               | 1211 |
|     |                                                                        |      | Q3MED3 | YP_321548.1                   | 1820 | PAS+LOV+3PAS+GAF+Kinase+ 2RR+Hpt | 1212 |
| 561 | <i>Arthrospira maxima</i> CS-328                                       | Cya  | B5W5T2 | WP_006625197.1                | 1276 | PAS+GAF+PAS+GAF+LOV+GGDEF+EAL    | 1213 |
|     |                                                                        |      | B5VY09 | WP_006668677.1                | 1184 | GAF+PAS+LOV+PAS+GAF+Kinase       | 1214 |
| 562 | <i>Arthrospira platensis</i> C1                                        | Cya  | K1W4H5 | WP_006625197.1                | 1276 | PAS+GAF+LOV+GGDEF+EAL            | 1215 |



|     |                                                                             |     |        |                           |      |                                 |      |
|-----|-----------------------------------------------------------------------------|-----|--------|---------------------------|------|---------------------------------|------|
|     |                                                                             |     | K1X4B3 | WP_006624369.1            | 1240 | GAF+PAS+LOV+PAS+Kinase          | 1216 |
|     |                                                                             |     | K1W3R6 | WP_006625388.1            | 452  | RR+LOV+GGDEF                    | 1217 |
| 563 | <i>Arthrospira platensis</i> NIES-39                                        | Cya | D5A2C5 | YP_005067517.1            | 501  | RR+LOV+GGDEF                    | 1218 |
|     |                                                                             |     | D5A3S6 | YP_005067758.1            | 1276 | PAS+GAF+LOV+GAF+GGDEF+EAL       | 1219 |
|     |                                                                             |     | D5A1P6 | YP_005071467.1            | 1240 | GAF+2PAS+LOV+GAF+Kinase         | 1220 |
| 564 | <i>Arthrospira platensis</i> str. Paraca                                    | Cya | K6DZN7 | WP_006618143.1            | 502  | RR+LOV+GGDEF                    | 1221 |
|     |                                                                             |     | K6DYP8 | WP_006618516.1            | 1276 | PAS+GAF+PAS+GAF+LOV+GGDEF+EAL   | 1222 |
|     |                                                                             |     | K6DR83 | WP_006616930.1            | 1240 | GAF+PAS+LOV+PAS+Kinase          | 1223 |
| 565 | <i>Arthrospira</i> sp. PCC 8005                                             | Cya | H1WBC0 | WP_008051195.1            | 542  | RR+LOV+GGDEF                    | 1224 |
|     |                                                                             |     | H1WBU5 | WP_008051404.1            | 1279 | PAS+GAF+LOV+GAF+PAS+EAL         | 1225 |
|     |                                                                             |     | H1WDU3 | WP_008052387.1            | 1240 | GAF+2LOV+PAS+2GAF+Kinase        | 1226 |
| 566 | <i>Chlorogloeopsis</i>                                                      | Cya |        | WP_016873643.1            | 917  | PAS+LOV+PAS+GGDEF+EAL           | 1227 |
|     |                                                                             |     |        | WP_016876159.1            | 1301 | PAS+LOV+3PAS+Kinase             | 1228 |
| 567 | <i>Crinalium epipsammum</i> PCC 9333                                        | Cya | K9VUA3 | YP_007140547.1            | 973  | LOV+GAF+Kinase                  | 1229 |
|     |                                                                             |     | K9VVG0 | YP_007141588.1            | 811  | LOV+PAS+GAF+Kinase              | 1230 |
| 568 | <i>Crocospaera watsonii</i>                                                 | Cya |        | WP_021836924.1            | 274  | RR+LOV                          | 1231 |
|     |                                                                             |     |        | WP_021831117.1            | 222  | RR+LOV                          | 1232 |
|     | <i>Crocospaera watsonii</i> WH 8501                                         | Cya | Q4BW45 | WP_007308072.1            | 297  | RR+LOV                          | 1233 |
|     | <i>Crocospaera watsonii</i> WH 0003                                         | Cya | G5JC80 | WP_007312830.1            | 483  | RR+LOV+GGDEF                    | 1234 |
| 569 | <i>Cyanobacterium aponinum</i> PCC 10605                                    | Cya | K9Z5T6 | YP_007162595.1            | 1220 | LOV+GAF+2PAS+GGDEF+EAL          | 1235 |
| 570 | <i>Cyanothece</i> ATCC 51142                                                | Cya | B1WPX1 | YP_001805352.1            | 483  | RR+LOV+GGDEF                    | 1236 |
|     | <i>Cyanothece</i> PCC 8801/ <i>Synechococcus</i> sp. PCC 8801               | Cya | B7JZ07 | YP_002372240.1            | 481  | RR+LOV+GGDEF                    | 1237 |
|     | <i>Cyanothece</i> sp. CCY0110                                               | Cya | A3IMW4 | WP_008274722.1            | 483  | RR+LOV+GGDEF                    | 1238 |
|     | <i>Cyanothece</i> sp. PCC 8802                                              | Cya | C7QX31 | YP_003137799.1            | 481  | RR+LOV+GGDEF                    | 1239 |
|     | <i>Cyanothece</i> sp.ATCC51472                                              | Cya | G6GZ93 | EHC21269.1/YP_001805352.1 | 483  | RR+LOV+GGDEF                    | 1240 |
| 571 | <i>Cylindrospermum stagnale</i> PCC 7417                                    | Cya | K9WTZ1 | YP_007146338.1            | 2260 | cbs+3PAS+GAF+LOV+Kinase         | 1241 |
| 572 | <i>filamentous cyanobacterium</i> ESFC-1                                    | Cya |        | WP_018397868.1            | 1587 | GAF+LOV+5PAS+GGDEF+EAL          | 1242 |
|     |                                                                             |     |        | WP_018398448.1            | 1504 | cbs+GAF+3PAS+LOV+3PAS+Kinase    | 1243 |
|     |                                                                             |     |        | WP_018398453.1            | 1047 | GAF+3PAS+LOV+PAS+Kinase         | 1244 |
| 573 | <i>Fischerella muscicola</i>                                                | Cya |        | WP_016869711.1            | 1013 | CBS+3PAS+LOV+PAS+Kinase         | 1245 |
|     |                                                                             |     |        | WP_016859885.1            | 803  | CBS+LOV+PAS+Kinase              | 1246 |
| 574 | <i>Geitlerinema</i> sp. PCC 7105                                            | Cya |        | WP_017659770.1            | 1803 | 2PAS+GAF+6PAS+LOV+2PAS+Kinase   | 1247 |
| 575 | <i>Geitlerinema</i> sp. PCC 7407                                            | Cya | K9S9T8 | YP_007110030.1            | 1135 | 2PAS+GAF+LOV+PAS+GGDEF+EAL      | 1248 |
| 576 | <i>Geminocystis herdmannii</i>                                              | Cya |        | WP_017295851.1            | 1249 | LOV+GAF+2PAS+GGDEF+EAL          | 1249 |
| 577 | <i>Gloeocapsa</i> sp. PCC 73106                                             | Cya | L8LH99 | WP_006530862.1            | 1137 | GAF+LOV+2PAS+GGDEF+EAL          | 1250 |
| 578 | <i>Halothece</i> sp. PCC 7418 ( <i>Synechococcus</i> sp. (strain PCC 7418)) | Cya | K9YDF6 | YP_007168649.1            | 731  | LOV+PAS+GGDEF+EAL               | 1251 |
| 579 | <i>Leptolyngbya</i> sp. PCC 7376                                            | Cya | K9Q326 | YP_007072303.1            | 1052 | GAF+LOV+PAS+GGDEF+EAL           | 1252 |
| 580 | <i>Lyngbya</i> sp. PCC 8106                                                 | Cya | A0YVI7 | WP_009786481.1            | 477  | RR+LOV+GGDEF                    | 1253 |
|     |                                                                             |     | A0YYE1 | WP_009787479.1            | 1090 | PAS+LOV+PAS+GGDEF+EAL           | 1254 |
|     |                                                                             |     | A0YS28 | WP_009785277.1            | 1261 | RR+RR+LOV+PAS+GAF+Kinase+RR     | 1255 |
|     |                                                                             |     | A0YI13 | WP_009782119.1            | 1006 | PAS+LOV+3PAS+GAF+GGDEF          | 1256 |
|     |                                                                             |     | A0YJV6 | WP_009782762.1            | 1211 | GAF+PAS+LOV+PAS+GAF+Kinase      | 1257 |
|     |                                                                             |     | A0YYE8 | WP_009787486.1            | 990  | PAS+GAF+LOV+GGDEF+EAL           | 1258 |
| 581 | <i>Mastigocladopsis repens</i>                                              | Cya |        | WP_017316340.1            | 897  | MHYT+GAF+LOV+MCP                | 1259 |
|     |                                                                             |     |        | WP_017315856.1            | 1497 | CBS+LOV+4PAS+Kinase             | 1260 |
|     |                                                                             |     |        | WP_017315856.1            | 1497 | CBS+LOV+4PAS+Kinase             | 1261 |
| 582 | <i>Microchaete</i> sp. PCC 7126                                             | Cya |        | WP_017651577.1            | 1069 | cbs+PAS+GAF+2PAS+LOV+GAF+Kinase | 1262 |
| 583 | <i>Microcoleus chTHonoplastes</i> PCC 7420                                  | Cya | B4VK29 | WP_006098908.1            | 2020 | 2PAS+LOV+4PAS+2GAF+Kinase+ 2RR  | 1263 |
|     |                                                                             |     | B4VKN6 | WP_006099135.1            | 483  | PAS+LOV+Cyclase                 | 1264 |
|     |                                                                             |     | B4VSY1 | WP_006101616.1            | 1145 | RR+GAF+LOV+2PAS+GAF+Kinase      | 1265 |
|     |                                                                             |     | B4VJB8 | WP_006098397.1            | 776  | LOV+GAF+Kinase                  | 1266 |
|     |                                                                             |     | B4VY11 | WP_006103549.1            | 1393 | 2PAS+GAF+LOV+2PAS+GGDEF+EAL     | 1267 |
| 584 | <i>Microcoleus</i> sp. PCC 7113                                             | Cya | K9WJW9 | YP_007124111.1            | 880  | LOV+PAS+Kinase+RR               | 1268 |

|     |                                                 |     |        |                            |      |                                     |      |
|-----|-------------------------------------------------|-----|--------|----------------------------|------|-------------------------------------|------|
|     |                                                 |     | K9WIF3 | YP_007123389.1             | 1204 | RR+3PAS+LOV+GAF+Kinase              | 1269 |
|     |                                                 |     | K9WVF8 | YP_007122711.1             | 483  | LOV+PAS+GGDEF                       | 1270 |
|     |                                                 |     | K9W9I5 | YP_007120451.1             | 494  | RR+LOV+GGDEF                        | 1271 |
|     |                                                 |     | K9WEP7 | YP_007122079.1             | 929  | PAS+LOV+PAS+GAF+Kinase              | 1272 |
|     |                                                 |     | K9WK80 | YP_007123343.1             | 621  | RR+LOV+Kinase                       | 1273 |
| 585 | <i>Microcoleus vaginatus</i> FGP-2              | Cya | F5UCI6 | WP_006631032.1             | 1102 | LOV+4PAS+Kinase                     | 1274 |
|     |                                                 |     | F5UNN6 | WP_006635552.1             | 1113 | LOV+4PAS+GAF+Kinase                 | 1275 |
|     |                                                 |     | F5UBU5 | WP_006631635.1             | 1024 | LOV+4PAS+GGDEF+EAL                  | 1276 |
|     |                                                 |     | F5UC68 | WP_006631762.1             | 1375 | PAS+GAF+LOV+GAF+PAS+2EAL            | 1277 |
| 586 | <i>Nodosilinea nodulosa</i>                     | Cya |        | WP_017296958.1             | 834  | GAF+LOV+Kinase+RR+Hpt               | 1278 |
| 587 | <i>Nostoc punctiforme</i> PCC 73102             | Cya | B2JAQ5 | YP_001870050.1             | 1043 | LOV+2PAS+GGDEF+EAL                  | 1279 |
|     |                                                 |     | B2J8F4 | YP_001865874.1             | 1403 | PAS+LOV+PAS+GAF+Kinase+2RR+Hpt      | 1280 |
| 588 | <i>Nostoc</i> sp. ATCC 29411                    | Cya | K9QZN6 | YP_007078500.1             | 1019 | LOV+2PAS+GGDEF+EAL                  | 1281 |
| 589 | <i>Nostoc</i> sp. ATCC 29412                    | Cya | K9QT62 | YP_007076412.1             | 1712 | CHASE+PAS+LOV+PAS+GAF+Kinase+RR+HPT | 1282 |
| 590 | <i>Nostoc</i> sp. PCC 7107                      | Cya | K9QBD4 | YP_007049843.1             | 1567 | CHASE+PAS+LOV+PAS+GAF+Kinase+RR+HPT | 1283 |
| 591 | <i>Nostoc</i> sp. PCC 7120                      | Cya | Q8YSB9 | NP_487210.1                | 1021 | LOV+2PAS+GGDEF+EAL                  | 1284 |
|     |                                                 |     | Q8YT51 | NP_486915.1                | 1817 | PAS+LOV+3PAS+GAF+Kinase+ 2RR+Hpt    | 1285 |
| 592 | <i>Oscillatoria acuminata</i> PCC 6304          | Cya | K9TPZ8 | YP_007088398.1             | 1288 | PAS+GAF+2PAS+LOV+GGDEF+EAL          | 1286 |
| 593 | <i>Oscillatoria formosa</i>                     | Cya |        | WP_019486854.1             | 1518 | 2PAS+GAF+PAS+GAF+LOV+GGDEF+EAL      | 1287 |
| 594 | <i>Oscillatoria nigro-viridis</i> PCC 7112      | Cya | K9VLB1 | YP_007117299.1             | 1344 | PAS+GAF+LOV+PAS+GGDEF+EAL           | 1288 |
|     |                                                 |     | K9VF92 | YP_007114341.1             | 1003 | LOV+3PAS+GGDEF+EAL                  | 1289 |
|     |                                                 |     | K9VJW6 | YP_007115936.1             | 1113 | LOV+4PAS+GAF+Kinase                 | 1290 |
|     |                                                 |     | K9VDJ7 | YP_007114659.1             | 1102 | LOV+2PAS+Kinase                     | 1291 |
| 595 | <i>Oscillatoria</i> sp. PCC 10802               | Cya |        | WP_017717108.1             | 1992 | RR+2PAS+LOV+6PAS+GAF+Kinase+RR      | 1292 |
| 596 | <i>Oscillatoria</i> sp. PCC 6506                | Cya | D8FYX  | WP_007354786.1             | 631  | PAS+LOV+Kinase                      | 1293 |
|     |                                                 |     | D8G8N3 | WP_007358144.1             | 1041 | LOV+GAF+PAS+GGDEF+2EAL              | 1294 |
|     |                                                 |     | D8FU68 | WP_007353135.1             | 1432 | GAF+LOV+PAS+LOV+PAS+2GAF+Kinase     | 1295 |
|     |                                                 |     | D8G759 | WP_007357627.1             | 1140 | LOV+3PAS+GGDEF+2EAL                 | 1296 |
| 597 | <i>Pleurocapsa</i> sp. PCC 7327                 | Cya | K9T9F1 | YP_007082610.1             | 479  | RR+LOV+GGDEF                        | 1297 |
| 598 | <i>Pseudanabaena biceps</i> PCC 7429            | Cya | L8MY36 | WP_009626941.1             | 1179 | PAS+LOV+GAF+Kinase+RR+HpT           | 1298 |
|     |                                                 |     | L8MXD6 | WP_009628448.1             | 945  | PAS+LOV+PAS+GAF+Kinase              | 1299 |
| 599 | <i>Pseudanabaena</i> sp. PCC 6802               | Cya |        | WP_019500070.1             | 935  | LOV+2PAS+Kinase                     | 1300 |
|     |                                                 |     |        | WP_019498621.1             | 737  | RR+PAS+LOV+Kinase                   | 1301 |
| 600 | <i>Scytonema hofmanni</i>                       | Cya |        | WP_017745401.1             | 930  | MHYT+GAF+LOV+HAMP+MCP               | 1302 |
|     |                                                 |     |        | WP_017746529.1             | 883  | GAF+LOV+PAS+GGDEF+EAL               | 1303 |
|     |                                                 |     |        | WP_017740454.1             | 949  | CBS+LOV+PAS+Kinase                  | 1304 |
|     |                                                 |     |        | WP_017744138.1             | 931  | MHYT+GAF+LOV+HAMP+MCP               | 1305 |
|     |                                                 |     |        | WP_017740600.1             | 923  | 2RR+LOV+Kinase+RR                   | 1306 |
| 601 | <i>Spirulina subsalsa</i>                       | Cya |        | WP_017306948.1             | 1652 | RR+LOV+8PAS+Kinase                  | 1307 |
|     |                                                 |     |        | WP_017305004.1             | 451  | PAS+LOV+GGDEF                       | 1308 |
| 602 | <i>Synechococcus</i> sp. ATCC 27167             | Cya | K9RZ52 | YP_007063296.1             | 1154 | GAF+PAS+LOV+Kinase+RR               | 1309 |
| 603 | <i>Synechococcus</i> sp. PCC 6301               | Cya | Q5N2F7 | YP_172033.1                | 578  | LOV+GGDEF+EAL                       | 1310 |
|     |                                                 |     | Q5N5M8 | YP_170910.1                | 929  | RR+PAS+PAS+LOV+ GGDEF+EAL           | 1311 |
| 604 | <i>Synechococcus</i> sp. PCC 7002               | Cya | B1XLQ8 | YP_001734607.1             | 780  | GAF+LOV+PAS+GGDEF                   | 1312 |
| 605 | <i>Synechococcus</i> sp. PCC 7502               | Cya | K9SZJ8 | YP_007107456.1             | 914  | 2PAS+LOV+GAF+Kinase                 | 1313 |
| 606 | <i>Synechococcus</i> sp. PCC 7942               | Cya | Q31RU9 | YP_399207.1                | 578  | LOV+GGDEF+EAL                       | 1314 |
|     |                                                 |     | Q31NI4 | YP_400372.1                | 929  | RR+PAS+PAS+LOV+ GGDEF+EAL           | 1315 |
| 607 | <i>Synechocystis</i> sp. PCC 6803               | Cya | L8ARN4 | BAM54579.1                 | 1235 | GAF+LOV+3PAS+GGDEF+EAL              | 1316 |
|     |                                                 |     | Q55576 | NP_442010.1                | 1244 | GAF+LOV+3PAS+GGDEF+EAL              | 1317 |
|     |                                                 |     | F7URV3 | YP_005652070.1/NP_442010.1 | 1244 | GAF+LOV+3PAS+GGDEF+EAL              | 1318 |
| 608 | <i>Synechocystis</i> sp. PCC 6803 substr. PCC-P | Cya | H0PFN3 | YP_005387047.1/NP_442010.1 | 1244 | GAF+LOV+3PAS+GGDEF+EAL              | 1319 |
|     |                                                 |     | H0PAQ0 | YP_005409754.1/NP_442010.1 | 1244 | GAF+LOV+3PAS+GGDEF+EAL              | 1320 |
| 609 | <i>Synechocystis</i> sp. PCC 6803 substr. GT-I  | Cya | H0NY98 | YP_005383878.1/NP_442010.1 | 1244 | GAF+LOV+3PAS+GGDEF+EAL              | 1321 |

|     |                                                     |      |        |                |      |                                  |      |
|-----|-----------------------------------------------------|------|--------|----------------|------|----------------------------------|------|
| 610 | <i>Thermosynechococcus elongatus</i> BP-1           | Cya  | Q8DJE3 | NP_682072.1    | 1353 | GAF+PAS+LOV+2GAF +Kinase+ RR     | 1322 |
| 611 | <i>Gemmata obscuriglobus</i>                        | PI   |        | WP_010043508.1 | 823  | PAS+LOV+Kinase+RR                | 1323 |
|     |                                                     |      |        | WP_010043417.1 | 997  | RR+2PAS+LOV+PAS+Kinase           | 1324 |
|     |                                                     |      |        | WP_010041727.1 | 1032 | 2PAS+LOV+PAS+Kinase+RR           | 1325 |
|     |                                                     |      |        | WP_010042468.1 | 1178 | 2PAS+LOV+PAS+GAF+Kinase+RR       | 1326 |
| 612 | <i>planctomycete</i> KSU-1                          | PI   | I3IH21 | WP_007220142.1 | 1155 | GAF+LOV+2PAS+Kinase+RR           | 1327 |
| 613 | <i>Rhodopirellula baltica</i> SH1                   | PI   | Q7USG5 | NP_866145.1    | 1637 | CHEB+CHER+PAS+LOV+PAS+Kinase+ RR | 1328 |
|     | <i>Rhodopirellula baltica</i> SH28                  | PI   | K5DM72 | WP_007330973.1 | 1637 | CHER+2PAS+LOV+PAS+Kinase+RR      | 1329 |
|     | <i>Rhodopirellula baltica</i> SWK14                 | PI   | L7CQZ7 | WP_007335941.1 | 1637 | CHER+2PAS+LOV+PAS+Kinase+RR      | 1330 |
|     | <i>Rhodopirellula baltica</i> SWK14                 | PI   | L7C999 | WP_007340810.1 | 1739 | CHER+2PAS+LOV+PAS+Kinase+RR      | 1331 |
|     | <i>Rhodopirellula baltica</i> WH47                  | PI   | F2B0L3 | WP_007329423.1 | 1637 | RR+CHER-CHERB+3PAS+LOV+Kinase    | 1332 |
| 614 | <i>Rhodopirellula europaea</i> 6C                   | PI   | M2B329 | WP_008657036.1 | 651  | LOV+Kinase                       | 1333 |
|     |                                                     |      | M2AB22 | WP_008661450.1 | 1637 | CHER+2PAS+LOV+PAS+Kinase+RR      | 1334 |
|     |                                                     |      | M2B160 | WP_008658004.1 | 1739 | CHER+2PAS+LOV+PAS+Kinase+RR      | 1335 |
|     | <i>Rhodopirellula europaea</i> SH398                | PI   | M5S556 | WP_008666956.1 | 1637 | CHER+2PAS+LOV+PAS+Kinase+RR      | 1336 |
| 615 | <i>Rhodopirellula maiorica</i> SM1                  | PI   | M5RDE8 | WP_008703751.1 | 1471 | CHER+2PAS+LOV+PAS+Kinase+RR      | 1337 |
| 616 | <i>Rhodopirellula salentina</i> SM41                | PI   | M5U3R2 | WP_008678750.1 | 1752 | CHER+2PAS+LOV+PAS+Kinase+RR      | 1338 |
| 617 | <i>Rhodopirellula</i> sp. SWK7                      | PI   | M5TB77 | WP_009094396.1 | 1738 | CHER+2PAS+LOV+PAS+Kinase+RR      | 1339 |
| 618 | <i>Schlesneria paludicola</i>                       | PI   |        | WP_010583390.1 | 819  | PAS+GAF+LOV+Kinase+RR            | 1340 |
|     |                                                     |      |        | WP_010587131.1 | 925  | PAS+LOV+Kinase+RR+HPT            | 1341 |
| 619 | <i>Zavarzinella formosa</i>                         | PI   |        | WP_020473798.1 | 660  | LOV+Kinase+RR                    | 1342 |
| 620 | <i>Leptospirillum ferriphilum</i> (strain ML-04)    | Nit  | J9Z9K3 | YP_006766144.1 | 1036 | GAF+LOV+PAS+GGDEF+EAL            | 1343 |
| 621 | <i>Leptospirillum ferrodiazotrophum</i>             | Nit  | C6HUQ3 | EES53679.1     | 1354 | 2PAS+GAF+LOV+GGDEF+Globin        | 1344 |
|     |                                                     |      | C6HW67 | EES53172.1     | 1369 | PAS+2GAF+PAS+LOV+GGDEF+Globin    | 1345 |
|     |                                                     |      | C6HYK0 | EES52285.1     | 496  | PAS+LOV+Kinase                   | 1346 |
| 622 | <i>Leptospirillum ferrooxidans</i> (strain C2-3)    | Nit  | IOIRY1 | YP_005470160.1 | 489  | LOV+GGDEF                        | 1347 |
| 623 | <i>Leptospirillum</i> sp. Group II 'C75'            | Nit  |        | EIJ77392.1     | 1036 | GAF+PAS+LOV+GGDEF+EAL            | 1348 |
| 624 | <i>Leptospirillum</i> sp. Group IV 'UBA BS'         | Nit  | T0Z8K9 | WP_021811090.1 | 1614 | PAS+GAF+PAS+GAF+LOV+GGDEF+EAL    | 1349 |
| 625 | <i>Leptospirillum</i> sp. GroupII '5-way CG'        | Nit  | B6AQW0 | EDZ38519.1     | 1035 | GAF+LOV+PAS+GGDEF+EAL            | 1350 |
| 626 | <i>Leptospirillum</i> sp. GroupII UBA               | Nit  | A3ERH5 | EAY57303.1     | 1036 | GAF+LOV+PAS+GGDEF+EAL            | 1351 |
| 627 | <i>Acidobacterium</i> sp. (strain MP5ACTX9)         | Bact | E8X7C4 | YP_004210485.1 | 519  | LOV+Kinase                       | 1352 |
| 628 | <i>Cellulophaga algicola</i> DSM 14237              | Bact | E6XF72 | YP_004165806.1 | 628  | PAS+LOV+Kinase                   | 1353 |
|     |                                                     |      | E6XEC5 | YP_004165713.1 | 1083 | 3PAS+LOV+GAF+Kinase              | 1354 |
| 629 | <i>Chloroherpeton thalassium</i> ATCC 35110         | Bact | B3QWA0 | YP_001995660.1 | 190  | Short-LOV                        | 1355 |
| 630 | <i>Cyclobacterium qasimii</i> M12-11B               | Bact | S7V803 | WP_020889873.1 | 972  | 2PAS+LOV+GAF+Kinase              | 1356 |
| 631 | <i>Eudoraea adriatica</i>                           | Bact |        | WP_019670355.1 | 631  | PAS+LOV+PAS+Kinase               | 1357 |
| 632 | <i>Formosa</i> sp. AK20                             | Bact | M7MMR6 | WP_007647936.1 | 809  | PAS+LOV+PAS+GAF+Kinase           | 1358 |
| 633 | <i>Fulvivirga imtechensis</i> AK7                   | Bact | L8JI64 | WP_009583264.1 | 1336 | CHER+PAS+LOV+PAS+Kinase          | 1359 |
| 634 | <i>Granulicella mallensis</i> DSM 23137             | Bact | G8NP03 | YP_005058137.1 | 519  | LOV+Kinase                       | 1360 |
| 635 | <i>Mucilaginibacter paludis</i> DSM 18603           | Bact | H1Y366 | WP_008509841.1 | 508  | LOV+PAS+Kinase                   | 1361 |
| 636 | <i>Muricauda ruestringensis</i> (strain DSM 13258)  | Bact | G2PRN8 | YP_004786909.1 | 848  | PAS+LOV+GAF+Kinase               | 1362 |
| 637 | <i>Pedobacter agri</i>                              | Bact |        | WP_010603242.1 | 517  | LOV+PAS+Kinase                   | 1363 |
| 638 | <i>Pedobacter</i> sp. BAL39                         | Bact | A6E9H1 | WP_008239045.1 | 512  | LOV+PAS+Kinase                   | 1364 |
| 639 | <i>Polaribacter franzmannii</i>                     | Bact |        | WP_018944019.1 | 836  | PAS+LOV+GAF+Kinase               | 1365 |
| 640 | <i>Sphingobacterium</i> sp. (strain 21)             | Bact | F4CCK0 | YP_004320289.1 | 520  | LOV+PAS+Kinase                   | 1366 |
| 641 | <i>Sphingobacterium</i> sp. IITKGP-BTPF85           | Bact | T0MYW2 | WP_021188605.1 | 282  | LOV+PAS                          | 1367 |
| 642 | <i>Zobellia galactanivorans</i> strain DSM 12802    | Bact | G0L288 | YP_004738261.1 | 1092 | 3PAS+LOV+GAF+PAS+Kinase          | 1368 |
| 643 | <i>Deinococcus apachensis</i>                       | DeTh |        | WP_019586595.1 | 285  | LOV+GGDEF                        | 1369 |
| 644 | <i>Deinococcus peraridilitoris</i> strain DSM 19664 | DeTh | L0A6T3 | YP_007174032.1 | 297  | LOV+GGDEF                        | 1370 |
| 645 | <i>Meiothermus ruber</i> ATCC 35948                 | DeTh | D3PRD8 | YP_003507041.1 | 578  | LOV+2PAS+Kinase                  | 1371 |
| 646 | <i>Truepera radiovictrix</i> DSM 17093              | DeTh | D7CV48 | YP_003706418.1 | 465  | LOV+PAS+Kinase                   | 1372 |
| 647 | <i>Sulfuricurvum kujijense</i> DSM 16994            | P(e) | E4U216 | YP_004060773.1 | 730  | LOV+PDEase/HD                    | 1373 |
|     |                                                     |      | E4U0K3 | YP_004060520.1 | 568  | PAS+LOV+GGDEF                    | 1374 |

|     |                                                       |              |        |                |      |                             |      |
|-----|-------------------------------------------------------|--------------|--------|----------------|------|-----------------------------|------|
|     |                                                       |              | E4U0H9 | YP_004060496.1 | 239  | RR+LOV                      | 1375 |
| 648 | <i>Sulfurovum</i> sp. (strain NBC37-1)                | <b>P(ε)</b>  | A6Q686 | YP_001357352.1 | 169  | Short-LOV                   | 1376 |
| 649 | <i>Acidobacterium</i> sp. (strain MP5ACTX9)           | <b>Acido</b> | E8X1X9 | YP_004217920.1 | 507  | LOV+Kinase                  | 1377 |
| 650 | <i>Terriglobus roseus</i> strain DSM 18391            | <b>Acido</b> | I3ZG30 | YP_006421533.1 | 525  | PAS+LOV+GGDEF               | 1378 |
|     |                                                       |              | I3ZDW9 | YP_006420772.1 | 522  | LOV+Kinase                  | 1379 |
|     |                                                       |              | I3ZJG2 | YP_006422715.1 | 862  | 2PAS+LOV+GGDEF+EAL          | 1380 |
| 651 | <i>Turneriella parva</i> ATCC BAA-1111                | <b>Spi</b>   | I4BB34 | YP_006441997.1 | 876  | RR+2PAS+LOV+PAS+Kinase      | 1381 |
| 652 | bacterium enrichment culture clone pWThLOV            | <b>Unc</b>   | B5M445 | ACH61904.1     | 1204 | GAF+2PAS+LOV+2PAS+Kinase+RR | 1382 |
| 653 | uncultured bacterium                                  | <b>Unc</b>   | K2EZH7 | EKE24251.1     | 859  | GAF+PAS+LOV+GGDEF+EAL       | 1383 |
|     |                                                       |              | K2FIR8 | EKE10710.1     | 620  | LOV+Kinase+RR               | 1384 |
| 654 | <i>Bacteriovorax</i> sp. Seq25_V                      | <b>P(δ)</b>  | T0RBD1 | EQC43725.1     | 193  | Short-LOV                   | 1385 |
| 655 | <i>Desulfococcus multivorans</i> DSM 2059             | <b>P(δ)</b>  | S7VBV4 | WP_020875425.1 | 1264 | LOV+GAF+PAS+Kinase+RR       | 1386 |
| 656 | <i>Myxococcus fulvus</i> (strain ATCC BAA-855 / HW-1) | <b>P(δ)</b>  | F8C6F8 | YP_004665424.1 | 802  | MASE1+LOV+Kinase+RR         | 1387 |
| 657 | <i>Myxococcus</i> sp. (contaminant ex DSM 436)        | <b>P(δ)</b>  |        | WP_002637984.1 | 809  | MASE1+LOV+Kinase+RR         | 1388 |
| 658 | <i>Myxococcus xanthus</i>                             | <b>P(δ)</b>  | Q84FB2 | AAO22901.1     | 830  | MASE1+LOV+Kinase+RR         | 1389 |
|     | <i>Myxococcus xanthus</i> (strain DK 1622)            | <b>P(δ)</b>  | Q1CXA1 | YP_634972.1    | 842  | MASE1+LOV+Kinase+RR         | 1390 |
